# Supplementary material
Source: PubMed Central journal article supplement (PMC6511956)
Supplement: ml8b00556_si_001.pdf [file ml8b00556_si_001.pdf]

## < Supporting Information >

### Improved Th17 Selectivity of $\alpha$ -Galactosylceramide via Noncovalent Interactions with Diether Moiety

Yoon Soo Hwang,<sup>†,§</sup> Junhyeong Yim,<sup>‡,§</sup> Heebum Song,<sup>†,§</sup> and Seung Bum Park<sup>\*,†,‡</sup>

<sup>†</sup>CRI Center for Chemical Proteomics, Department of Chemistry, Seoul National University, Seoul 08826, Korea

<sup>‡</sup>Department of Biophysics and Chemical Biology, Seoul National University, Seoul 08826, Korea

<sup>§</sup>These authors contributed equally.

TEL: +82-2-880-9090; FAX: +82-2-884-4025; E-mail: sbpark@snu.ac.kr

| <b>Table of Contents</b>                                  | <b>Page No.</b> |
|-----------------------------------------------------------|-----------------|
| 1. Supplementary Figure and Table                         | S2–S3           |
| 2. General Experimental Information                       | S4–S7           |
| 3. Synthetic Procedures and Characterization of Compounds | S8–S23          |
| 4. <sup>1</sup> H and <sup>13</sup> C NMR Spectra         | S24–S101        |
| 5. References                                             | S102            |

## 1. Supplementary Figure and Table

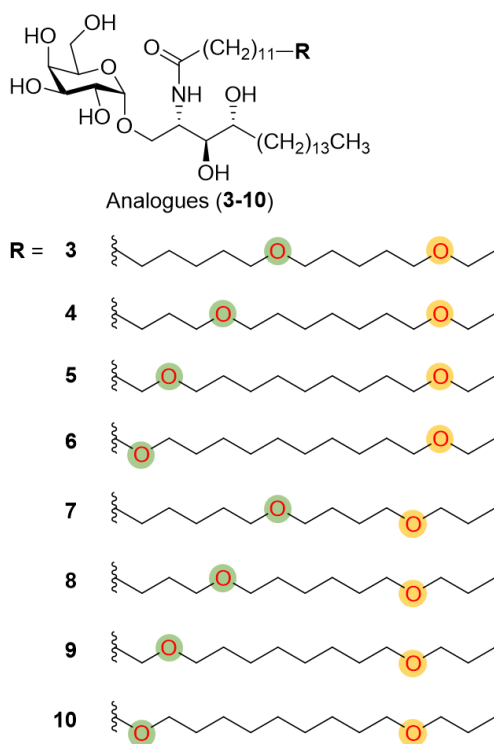

**Table S1.** Docking score of compounds 1–10 via molecular modeling

| Compound    | Docking score <sup>a</sup> |
|-------------|----------------------------|
| 6           | -39.7129                   |
| 5           | -38.8957                   |
| 10          | -38.8436                   |
| 9           | -31.5776                   |
| 4           | -29.9297                   |
| 8           | -27.7277                   |
| 1 (KRN7000) | -25.5371                   |
| 3           | -24.2426                   |
| 7           | -21.5563                   |
| 2 (OCH)     | N/A <sup>b</sup>           |

<sup>a</sup>Docking score by CDOCKER interaction energy

<sup>b</sup>2 (OCH) was filtered or failed to dock.

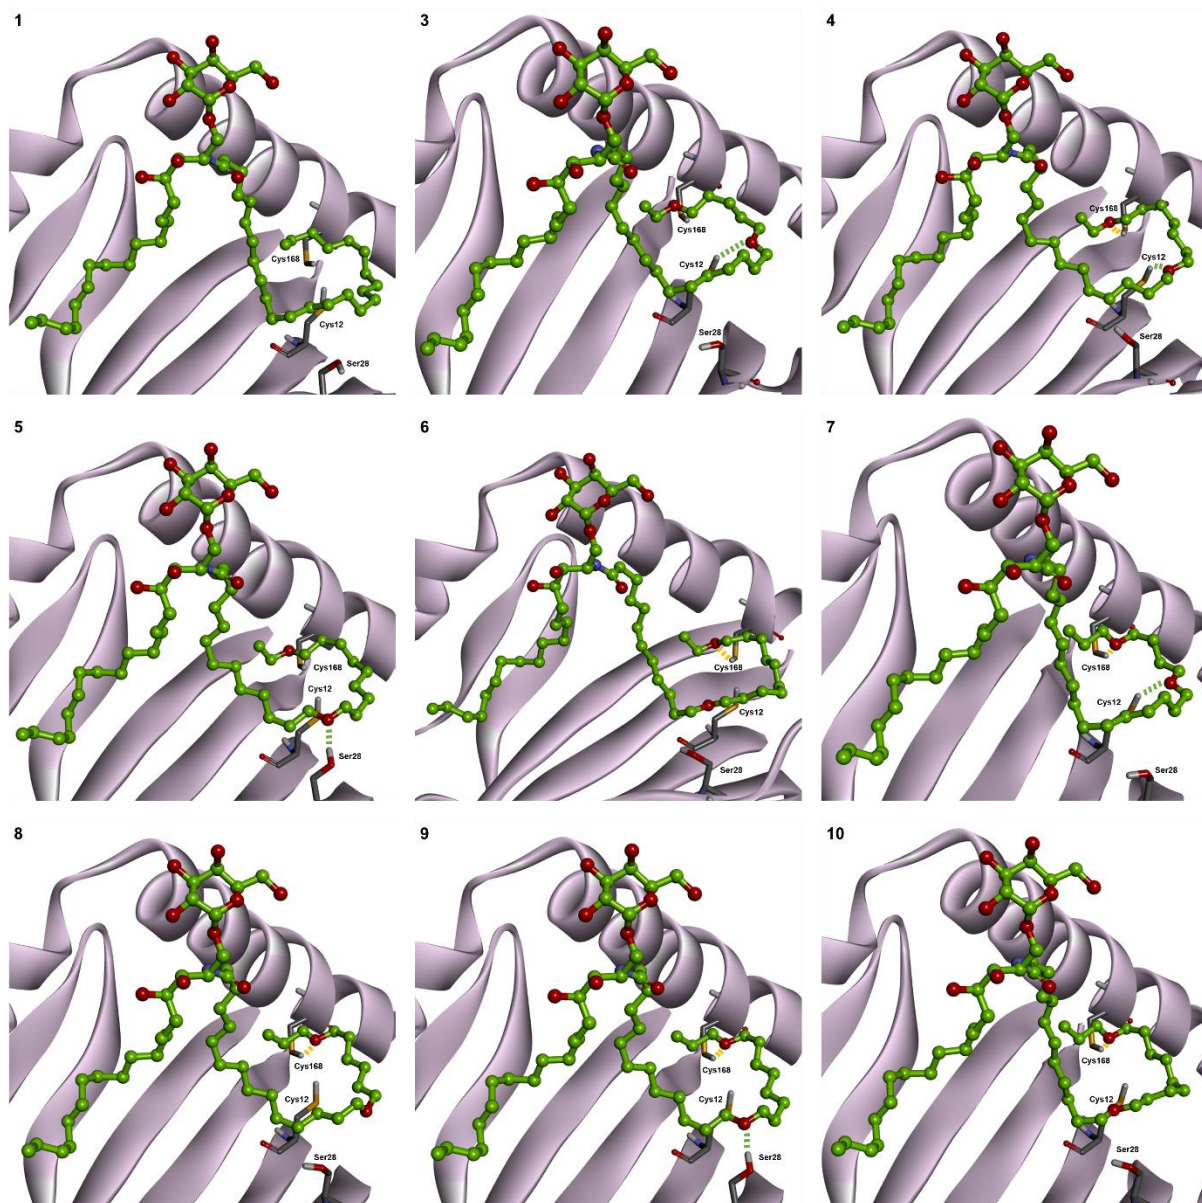

**Figure S1.** Optimized binding modes of compounds 1 and 3–10 within the binding pocket of mCD1d via *in situ* ligand minimization (PDB code: 3HE6). The potential hydrogen-bonding interactions are presented with green and yellow dotted lines.

## 2. General Experimental Information

### A. Molecular modeling

Preliminary evaluation of  $\alpha$ -GalCer analogues (**3–10**) was performed with Discovery Studio Client v16.1.0.15350. The co-crystal structure of mCD1d and KRN7000 (**1**) (PDB code: 3HE6) was utilized. Polar hydrogens in the side chain of Cys12, Ser28 and Cys168 were rotated to induce hydrogen-bonding interactions with ligands. The binding site was defined from receptor cavities. LigandFit module was used for docking and docking scores of each compound were summarized in Table S1. With ligands docked by LigandFit module, *in situ* ligand minimization protocol was performed to get the optimized binding mode of ligands within the binding pocket of mCD1d and find out potential hydrogen-bonding interactions between ligands and mCD1d.

### B. Materials

KRN7000 (**1**) (Purity  $\geq$  96% by  $^1\text{H}$  NMR) and OCH (**2**) (Purity  $\geq$  95% by  $^1\text{H}$  NMR) were purchased from AdipoGen Life Sciences. All commercially available reagents for organic synthesis were purchased from Sigma-Aldrich, Tokyo Chemical Industry Co., Ltd, or ThermoFisher Scientific and used without further purification unless otherwise specified. Solvents were purchased from commercial vendors and used without further purification unless otherwise mentioned. Dry solvents were prepared using ultimate solvent purification system CT-SPS-SA [Glass Contour]. The progress of reaction was monitored using thin-layer chromatography (TLC) (silica gel 60, F<sub>254</sub> 0.25 mm). Components on TLC were visualized by treating the TLC plates with *p*-anisaldehyde, KMnO<sub>4</sub>, or phosphomolybdic acid followed by heating. The compounds were purified by flash column chromatography on silica-gel (230–400 mesh). The eluent used for purification is reported in parentheses.

### C. Compound characterization

The optical rotations were measured by JP/P-1030 [JASCO] using a sodium lamp (D line, 589 nm).  $^1\text{H}$  and  $^{13}\text{C}$  NMR spectra were obtained on Bruker DRX-300 [Bruker Biospin], Agilent 400-MR DD2 [Agilent Technologies], or Varian Inova-500 [Varian Associates]. Chemical shifts were reported in parts per million ( $\delta$ , ppm).  $^1\text{H}$  NMR spectra were calibrated using the residual solvent peak (CDCl<sub>3</sub> 7.26 ppm; CD<sub>2</sub>Cl<sub>2</sub> 5.32 ppm) or tetramethylsilane (TMS, 0.00 ppm) as an internal standard.  $^{13}\text{C}$  NMR spectra were calibrated using the residual solvent peak (CDCl<sub>3</sub> 77.16 ppm or 77.23 ppm; CD<sub>2</sub>Cl<sub>2</sub> 53.84 ppm; CD<sub>3</sub>OD 49.00 ppm). Multiplicity was noted as: s (singlet); d (doublet); t (triplet); q (quartet); m (multiplet); dd (doublet of doublet); dt (doublet of triplet); td (triplet of doublet); br s (broad singlet), etc. Coupling constants were reported in Hz. Low-resolution mass spectrometry (LRMS) was obtained by LCMS-2020 [Shimadzu] and LTQ [Thermo Fisher Scientific] using electron spray ionization (ESI). High-resolution mass spectrometry (HRMS) of final compounds (**3–10**) was confirmed by Ultra High Resolution ESI Q-TOF mass spectrometer [Bruker] from *Organic Chemistry Research Center* at Sogang University. The purity of KRN7000 (**1**) and OCH (**2**) was measured by Vanquish DUO Flex [ThermoFisher Scientific].

### D. Purity of compounds 1–10

The purity of  $\alpha$ -GalCer analogues (**3–10**) was  $\geq$  95% based on  $^1\text{H}$  NMR spectra. The purity of KRN7000 (**1**) and OCH (**2**) from AdipoGen Life Sciences was claimed as  $\geq$  96% and  $\geq$  95% by  $^1\text{H}$  NMR, respectively. To check the purity of the commercial KRN7000 (**1**) and OCH (**2**), HPLC equipped with charged aerosol detector (CAD) was used. Chromatograms of KRN7000 (**1**) and OCH (**2**) are shown with detailed conditions of HPLC and CAD. In average, KRN7000 (**1**) showed 87.3% purity and OCH (**2**) showed 79.5% purity from three independent measurements. Although the purity of the commercial KRN7000 (**1**) and OCH (**2**) was less than  $\geq$  95%, the active ingredient of the compounds was still major (around 80% or higher). Thus, we used the commercial KRN7000 (**1**) and OCH (**2**) without further purification and the biological evaluations using these commercial compounds with that purity still provided the desired activity for our study.



**Chromatograms**

KRN7000 (1)

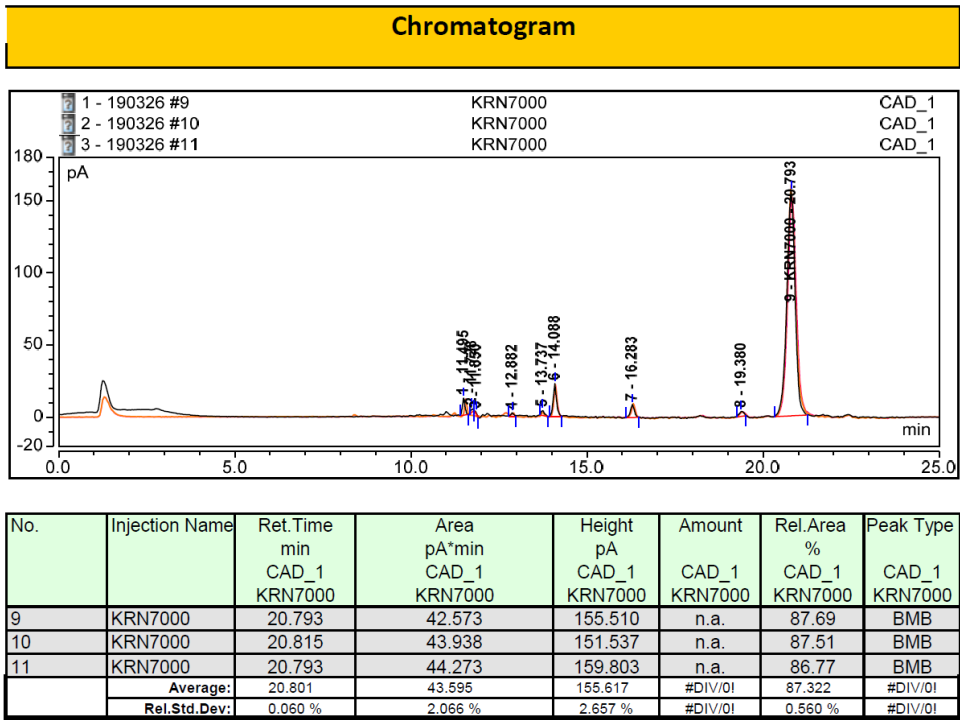

OCH (2)

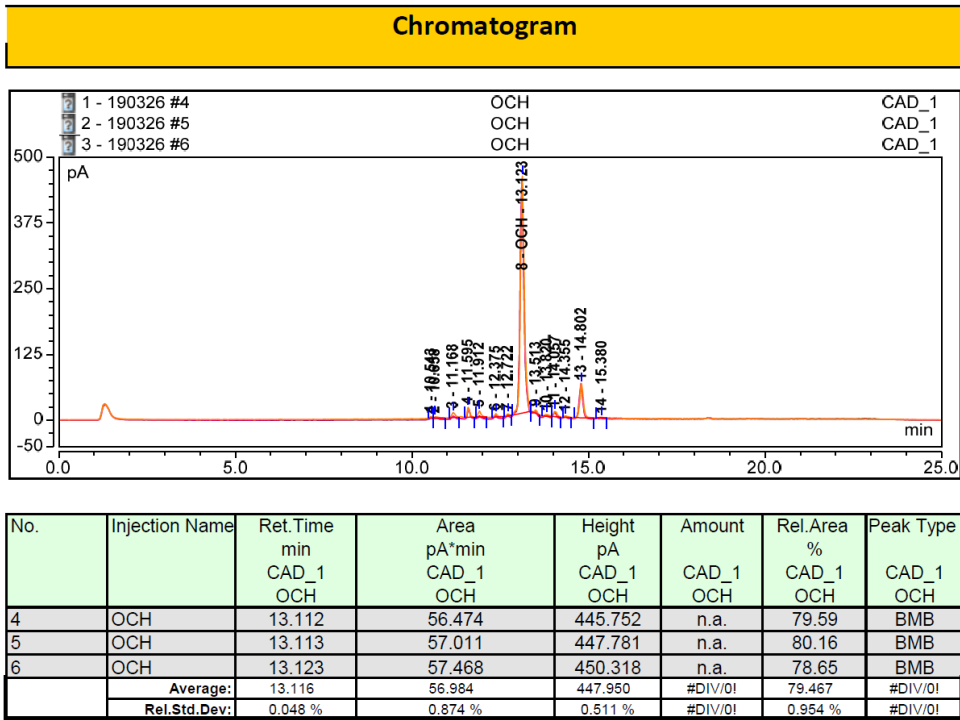

### Conditions of HPLC

\* Column: Acclaim™ 120 C18, 2.1 × 150 mm, 2.2 μm [ThermoFisher Scientific]

\* Mobile phase

- A: 0.05% TFA in H<sub>2</sub>O

- B: 0.05% TFA in MeOH

- 60% ~ 100% of % B gradient

| No | Time    | Flow [ml/min] | %B    | %C  | Curve    |
|----|---------|---------------|-------|-----|----------|
| 1  | 0.000   |               |       |     | Run      |
| 2  | 0.000   | 0.400         | 60.0  | 0.0 | 5        |
| 3  | 8.000   | 0.400         | 100.0 | 0.0 | 5        |
| 4  | 20.000  | 0.400         | 100.0 | 0.0 | 5        |
| 5  | 21.000  | 0.400         | 60.0  | 0.0 | 5        |
| 6  | 25.000  | 0.400         | 60.0  | 0.0 | 5        |
| 7  | New Row |               |       |     |          |
| 8  | 25.000  |               |       |     | Stop Run |

\* Flow rate: 0.4 mL/min

\* Injection volume: 5 μL

\* Column oven temperature: 40 °C (Active pre-heater 40 °C, Forced mode)

### Conditions of CAD

\* Evaporation temperature: 70 °C

\* Filter: 5.0 s

\* Data collection rate: 10 Hz

\* Power function: 1.0

## E. Biological methods

**In vitro stimulation of NKT cells.** Murine hepatic mononuclear cells (HMNC) from wild-type C57BL/6 mice [CRJ, Yokohama, Japan] were isolated using Percoll [GE Healthcare, 17-0891-01] gradients. Cells ( $2 \times 10^5$  cells) were stimulated with DMSO, KRN7000 (**1**), OCH (**2**) and  $\alpha$ -GalCer analogues (**3–10**) in a 96-well treated multiwell tissue culture U-BottomPlates [Falcon, 353077] for 24 or 72 h. Supernatants were collected and assayed to quantify secreted cytokines by ELISA. All assays were performed in duplicate (technical replicates) and repeated three or five times under independent conditions (biological replicates). Data are presented as mean  $\pm$  SEM.

**Flow cytometry.** Murine HMNCs were incubated with mAbs to mouse NK1.1 and TCR- $\beta$  that were conjugated to PE [BD Biosciences, 557391] or PE-Cyanine5 [eBioscience, 15-5961-82]. Cells were analyzed using a BD FACSDIVA™ v6.1 [BD Biosciences, San Jose, CA], and FlowJo software v10 [Tree Star, Ashland, OR]. About 25–30% of the total cells were NK1.1<sup>+</sup>TCR<sup>+</sup> cells.

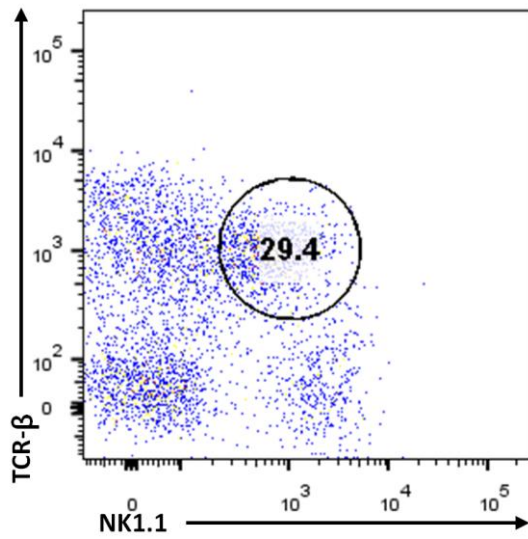

#### Enzyme-linked immunosorbent assay (ELISA).

Nunc clear polystyrene 96-well microwell plate with maxisorp surface plates [Thermo, 439454] was coated overnight with capture antibody from each ELISA Kit at room temperature (r.t.). All procedures were followed by manufacture's protocol. ELISA kit for IL-2 [R&D Systems, DY402] was used for quantifying 24 h incubated samples, and ELISA kits for IL-4 [R&D Systems, DY404], IFN- $\gamma$  [R&D Systems, DY485], IL-17 [R&D Systems, DY421] were used for quantifying 72 h incubated samples. The color was developed by using TMB solution [Thermo, 002023], and absorbance was observed at 450, 540 nm with Synergy HT [Biotek, Winooski, VT], and Gen5 v1.01.14 [Biotek, Winooski, VT]. Technical replicates



**Compound 12g:** Compound **12g** was synthesized from **11g** (1 g, 6.84 mmol) with the procedure A and obtained as colorless oil. Yield: 50% (784.0 mg, 3.40 mmol); <sup>1</sup>H NMR (400 MHz, CDCl<sub>3</sub>, reference peak CDCl<sub>3</sub> at 7.26 ppm): δ 4.57–4.56 (m, 1H), 3.89–3.83 (m, 1H), 3.72 (dt, *J* = 9.2, 6.8 Hz, 1H), 3.63 (t, *J* = 5.6 Hz, 2H), 3.50–3.46 (m, 1H), 3.37 (dt, *J* = 9.6, 6.8 Hz, 1H), 1.85–1.78 (m, 1H), 1.74–1.68 (m, 1H), 1.60–1.51 (m, 8H), 1.37–1.32 (m, 9H); <sup>13</sup>C NMR (100 MHz, CDCl<sub>3</sub>, reference peak CDCl<sub>3</sub> at 77.23 ppm): δ 99.1, 67.9, 63.2, 62.6, 33.0, 31.0, 29.9, 29.6, 29.5, 26.4, 25.9, 25.7, 19.9; LRMS (ESI) *m/z* calcd for C<sub>13</sub>H<sub>26</sub>NaO<sub>3</sub> [M+Na]<sup>+</sup>: 253.2, found: 253.3.

## B. General synthetic procedure and characterization for compounds 13a–13g

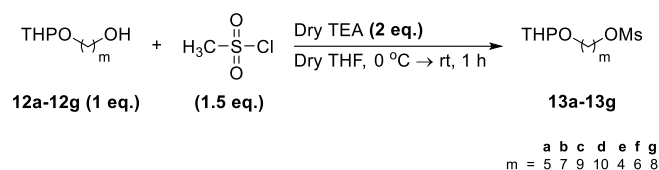

To a solution of **12a–12g** (1 equiv.) in dry THF (0.1 M for **12a–12g**) at 0 °C were added methanesulfonyl chloride (MsCl, 1.5 equiv.) and dry triethylamine (TEA, 2 equiv.) under Ar(g), then stirred at r.t. for 1 h. After reaction completion checked by TLC, the reaction mixture was filtered with EA and concentrated *in vacuo*. The residue was purified by silica-gel flash column chromatography (20% EA in hexane gradient to 25%) to obtain the desired compounds **13a–13g**.

**Compound 13a:** Compound **13a** was synthesized from **12a** (900 mg, 4.78 mmol) with the procedure B and obtained as colorless oil. Yield: 96% (1.2182 g, 4.57 mmol); <sup>1</sup>H NMR (400 MHz, CDCl<sub>3</sub>, reference peak CDCl<sub>3</sub> at 7.26 ppm): δ 4.56–4.55 (m, 1H), 4.23 (t, *J* = 6.6 Hz, 2H), 3.87–3.82 (m, 1H), 3.75 (dt, *J* = 9.6, 6.8 Hz, 1H), 3.52–3.47 (m, 1H), 3.39 (dt, *J* = 9.6, 6.8 Hz, 1H), 3.00 (s, 3H), 1.84–1.75 (m, 3H), 1.74–1.67 (m, 1H), 1.65–1.60 (m, 2H), 1.58–1.46 (m, 6H); <sup>13</sup>C NMR (100 MHz, CDCl<sub>3</sub>, reference peak CDCl<sub>3</sub> at 77.16 ppm): δ 99.1, 70.1, 67.2, 62.6, 37.5, 30.9, 29.3, 29.1, 25.6, 22.5, 19.8; LRMS (ESI) *m/z* calcd for C<sub>11</sub>H<sub>22</sub>NaO<sub>5</sub>S [M+Na]<sup>+</sup>: 289.1, found: 289.3.

**Compound 13b:** Compound **13b** was synthesized from **12b** (809.2 mg, 3.74 mmol) with the procedure B and obtained as colorless oil. Yield: 99% (1.0858 g, 3.69 mmol); <sup>1</sup>H NMR (400 MHz, CDCl<sub>3</sub>, reference peak CDCl<sub>3</sub> at 7.26 ppm): δ 4.56–4.54 (m, 1H), 4.20 (t, *J* = 6.4 Hz, 2H), 3.87–3.82 (m, 1H), 3.71 (dt, *J* = 9.2, 6.8 Hz, 1H), 3.51–3.45 (m, 1H), 3.36 (dt, *J* = 9.2, 6.8 Hz, 1H), 2.98 (s, 3H), 1.84–1.67 (m, 4H), 1.59–1.48 (m, 6H), 1.44–1.36 (m, 6H); <sup>13</sup>C NMR (100 MHz, CDCl<sub>3</sub>, reference peak CDCl<sub>3</sub> at 77.16 ppm): δ 99.0, 70.2, 67.6, 62.5, 37.4, 30.9, 29.7, 29.2, 28.9, 26.2, 25.6, 25.5, 19.8; LRMS (ESI) *m/z* calcd for C<sub>13</sub>H<sub>26</sub>NaO<sub>5</sub>S [M+Na]<sup>+</sup>: 317.1, found: 317.3.

**Compound 13c:** Compound **13c** was synthesized from **12c** (716.5 mg, 2.93 mmol) with the procedure B and obtained as colorless oil. Yield: 97% (920.1 mg, 2.85 mmol); <sup>1</sup>H NMR (400 MHz, CDCl<sub>3</sub>, reference peak CDCl<sub>3</sub> at 7.26 ppm): δ 4.56–4.55 (m, 1H), 4.21 (t, *J* = 6.6 Hz, 2H), 3.89–3.83 (m, 1H), 3.72 (dt, *J* = 9.6, 6.8 Hz, 1H), 3.50–3.46 (m, 1H), 3.37 (dt, *J* = 9.6, 6.4 Hz, 1H), 2.99 (s, 3H), 1.85–1.79 (m, 1H), 1.77–1.68 (m, 3H), 1.60–1.51 (m, 6H), 1.39–1.31 (m, 10H); <sup>13</sup>C NMR (100 MHz, CDCl<sub>3</sub>, reference peak CDCl<sub>3</sub> at 77.16 ppm): δ 99.0, 70.3, 67.8, 62.5, 37.5, 30.9, 29.8, 29.5, 29.2, 29.1, 26.3, 25.6, 25.5, 19.9; LRMS (ESI) *m/z* calcd for C<sub>15</sub>H<sub>30</sub>NaO<sub>5</sub>S [M+Na]<sup>+</sup>: 345.2, found: 345.4.

**Compound 13d:** Compound **13d** was synthesized from **12d** (219.6 mg, 0.85 mmol) with the procedure B and obtained as colorless oil. Yield: 98% (279.6 mg, 0.83 mmol); <sup>1</sup>H NMR (300 MHz, CDCl<sub>3</sub>, reference peak CDCl<sub>3</sub> at 7.26 ppm): δ 4.58–4.56 (m, 1H), 4.22 (t, *J* = 6.6 Hz, 2H), 3.90–3.83 (m, 1H), 3.72 (dt, *J* = 9.6, 6.9 Hz, 1H), 3.53–3.46 (m, 1H), 3.38 (dt, *J* = 9.6, 6.6 Hz, 1H), 3.00 (s, 3H), 1.87–1.65 (m, 4H), 1.63–1.48 (m, 6H), 1.41–1.29 (m, 12H); <sup>13</sup>C NMR (100 MHz, CDCl<sub>3</sub>, reference peak CDCl<sub>3</sub> at 77.23 ppm): δ 99.1, 70.4, 67.9, 62.6, 37.6, 31.0, 29.9, 29.6, 29.5, 29.3, 29.2, 26.4, 25.7, 25.6, 19.9; LRMS (ESI) *m/z* calcd for C<sub>16</sub>H<sub>32</sub>NaO<sub>5</sub>S [M+Na]<sup>+</sup>: 359.2, found: 359.5.

**Compound 13e:** Compound **13e** was synthesized from **12e** (785 mg, 4.50 mmol) with the procedure B and obtained as colorless oil. Yield: quantitative (1.144 g, 4.53 mmol); <sup>1</sup>H NMR (400 MHz, CDCl<sub>3</sub>, reference peak CDCl<sub>3</sub> at 7.26 ppm): δ 4.57–4.56 (m, 1H), 4.28 (t, *J* = 6.4 Hz, 2H), 3.87–3.75 (m, 2H), 3.53–3.48 (m, 1H), 3.42 (dt, *J* = 9.6, 6.4 Hz, 1H), 3.00 (s, 3H), 1.91–1.77 (m, 3H), 1.75–1.67 (m, 3H), 1.60–1.52 (m, 4H); <sup>13</sup>C NMR (100 MHz, CDCl<sub>3</sub>, reference peak CDCl<sub>3</sub> at 77.16 ppm): δ 99.1, 70.1, 66.7, 62.6, 37.5, 30.8, 26.5, 25.9, 25.6, 19.8; LRMS (ESI) *m/z* calcd for C<sub>10</sub>H<sub>20</sub>NaO<sub>5</sub>S [M+Na]<sup>+</sup>: 275.1, found: 275.3.

**Compound 13f:** Compound **13f** was synthesized from **12f** (750 mg, 3.71 mmol) with the procedure B and obtained as colorless oil. Yield: quantitative (1.0371 g, 3.70 mmol); <sup>1</sup>H NMR (400 MHz, CDCl<sub>3</sub>, reference peak CDCl<sub>3</sub> at 7.26 ppm): δ 4.57–4.55 (m, 1H), 4.22 (t, *J* = 6.8 Hz, 2H), 3.88–3.83 (m, 1H), 3.73 (dt, *J* = 9.2, 6.8 Hz, 1H), 3.51–3.47 (m, 1H), 3.38 (dt, *J* = 9.6, 6.8 Hz, 1H), 3.00 (s, 3H), 1.85–1.68 (m, 4H), 1.64–1.50 (m, 6H), 1.48–1.42 (m, 4H); <sup>13</sup>C NMR (100 MHz, CDCl<sub>3</sub>, reference peak CDCl<sub>3</sub> at 77.23 ppm): δ 99.2, 70.2, 67.6, 62.7, 37.6, 31.0, 29.7, 29.3, 26.0, 25.7, 25.5, 19.9; LRMS (ESI) *m/z* calcd for C<sub>12</sub>H<sub>24</sub>NaO<sub>5</sub>S [M+Na]<sup>+</sup>: 303.1, found: 303.4.

**Compound 13g:** Compound **13g** was synthesized from **12g** (760 mg, 3.30 mmol) with the procedure B and obtained as colorless oil. Yield: quantitative (1.0348 g, 3.36 mmol); <sup>1</sup>H NMR (400 MHz, CDCl<sub>3</sub>, reference peak CDCl<sub>3</sub> at 7.26 ppm): δ 4.57–4.56 (m, 1H), 4.21 (t, *J* = 6.4 Hz, 2H), 3.89–3.84 (m, 1H), 3.72 (dt, *J* = 9.6, 6.8 Hz, 1H), 3.52–3.47 (m, 1H), 3.37 (dt, *J* = 9.6, 6.8 Hz, 1H), 3.00 (s, 3H), 1.85–1.79 (m, 1H), 1.78–1.68 (m, 3H), 1.61–1.50 (m, 6H), 1.39–1.33 (m, 8H); <sup>13</sup>C NMR (100 MHz, CDCl<sub>3</sub>, reference peak CDCl<sub>3</sub> at 77.23 ppm): δ 99.1, 70.3, 67.8, 62.6, 37.6, 31.0, 29.9, 29.5, 29.3, 29.2, 26.3, 25.7, 25.6, 19.9; LRMS (ESI) *m/z* calcd for C<sub>14</sub>H<sub>28</sub>NaO<sub>5</sub>S [M+Na]<sup>+</sup>: 331.2, found: 331.4.

### C. General synthetic procedure and characterization for compounds 14a–14h

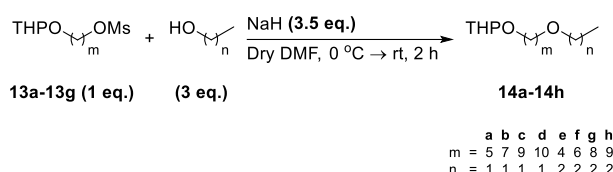

To a solution of NaH (3.5 equiv.) in dry dimethylformamide (DMF) at 0 °C was added ethanol or propanol (3 equiv.) under Ar(g), then stirred at 0 °C for 5 min. To the reaction mixture was added **13a–13g** (1 equiv.) in dry DMF, then stirred at r.t. for 2 h. The concentration of the reaction mixture was 0.1 M for **13a–13g**. After reaction completion checked by TLC, the reaction mixture was quenched with saturated NH<sub>4</sub>Cl(aq.). The resultant was extracted with EA three times. The combined organic layer was dried over anhydrous Na<sub>2</sub>SO<sub>4</sub>(s) and concentrated *in vacuo* after filtration. The resultant was evaporated with toluene twice to remove DMF. The residue was purified by silica-gel flash column chromatography (6.25% EA in hexane gradient to 7.69%) to obtain the desired compounds **14a–14h**.

**Compound 14a:** Compound **14a** was synthesized from **13a** (500 mg, 1.88 mmol) with the procedure C and obtained as colorless oil. Yield: 88% (356.5 mg, 1.65 mmol); <sup>1</sup>H NMR (400 MHz, CDCl<sub>3</sub>, reference peak CDCl<sub>3</sub> at 7.26 ppm): δ 4.57–4.56 (m, 1H), 3.89–3.83 (m, 1H), 3.74 (dt, *J* = 10, 6.8 Hz, 1H), 3.52–3.36 (m, 6H), 1.85–1.79 (m, 1H), 1.74–1.68 (m, 1H), 1.66–1.49 (m, 8H), 1.46–1.38 (m, 2H), 1.19 (t, *J* = 7.2 Hz, 3H); <sup>13</sup>C NMR (100 MHz, CDCl<sub>3</sub>, reference peak CDCl<sub>3</sub> at 77.16 ppm): δ 99.0, 70.7, 67.7, 66.2, 62.5, 30.9, 29.8, 29.7, 25.6, 23.0, 19.8, 15.4; LRMS (ESI) *m/z* calcd for C<sub>12</sub>H<sub>24</sub>NaO<sub>3</sub> [M+Na]<sup>+</sup>: 239.2, found: 239.3.

**Compound 14b:** Compound **14b** was synthesized from **13b** (500 mg, 1.70 mmol) with the procedure C and obtained as colorless oil. Yield: 93% (385.9 mg, 1.58 mmol); <sup>1</sup>H NMR (400 MHz, CDCl<sub>3</sub>, reference peak CDCl<sub>3</sub> at 7.26 ppm): δ 4.57–4.56 (m, 1H), 3.89–3.84 (m, 1H), 3.72 (dt, *J* = 9.2, 6.8 Hz, 1H), 3.52–3.35 (m, 6H), 1.85–1.78 (m, 1H), 1.74–1.68 (m, 1H), 1.62–1.49 (m, 8H), 1.40–1.28 (m, 6H), 1.19 (t, *J* = 7.2 Hz, 3H); <sup>13</sup>C NMR (100 MHz, CDCl<sub>3</sub>, reference peak CDCl<sub>3</sub> at 77.16 ppm): δ 99.0, 70.9, 67.8, 66.2, 62.5, 30.9, 29.9, 29.8, 29.5, 26.35, 26.31, 25.6, 19.8, 15.4; LRMS (ESI) *m/z* calcd for C<sub>14</sub>H<sub>28</sub>NaO<sub>3</sub> [M+Na]<sup>+</sup>: 267.2, found: 267.3.

**Compound 14c:** Compound **14c** was synthesized from **13c** (500 mg, 1.55 mmol) with the procedure C and obtained as colorless oil. Yield: 91% (385.4 mg, 1.41 mmol); <sup>1</sup>H NMR (400 MHz, CDCl<sub>3</sub>, reference peak CDCl<sub>3</sub> at 7.26 ppm): δ 4.57–4.56 (m, 1H), 3.89–3.84 (m, 1H), 3.72 (dt, *J* = 9.2, 7.0 Hz, 1H), 3.51–3.43 (m, 3H), 3.41–3.34 (m, 3H), 1.86–1.78 (m, 1H), 1.74–1.68 (m, 1H), 1.58–1.50 (m, 8H), 1.30 (m, 10H), 1.19 (t, *J* = 7.0 Hz, 3H); <sup>13</sup>C NMR (100 MHz, CDCl<sub>3</sub>, reference peak CDCl<sub>3</sub> at 77.16 ppm): δ 99.0, 70.9, 67.8, 66.2, 62.5, 30.9, 30.0, 29.9, 29.7, 29.59, 29.56, 26.4, 26.3, 25.6, 19.8, 15.4; LRMS (ESI) *m/z* calcd for C<sub>16</sub>H<sub>32</sub>NaO<sub>3</sub> [M+Na]<sup>+</sup>: 295.2, found: 295.4.

**Compound 14d:** Compound **14d** was synthesized from **13d** (313.9 mg, 0.93 mmol) with the procedure C and obtained as colorless oil. Yield: 97% (259.7 mg, 0.91 mmol); <sup>1</sup>H NMR (300 MHz, CDCl<sub>3</sub>, reference peak CDCl<sub>3</sub> at 7.26 ppm): δ 4.58–4.56 (m, 1H), 3.90–3.83 (m, 1H), 3.72 (dt, *J* = 9.6, 6.9 Hz, 1H), 3.53–3.45 (m, 3H), 3.42–3.33 (m, 3H), 1.87–1.77 (m, 1H), 1.75–1.65 (m, 1H), 1.61–1.48 (m, 8H), 1.40–1.28 (m, 12H), 1.19 (t, *J* = 7.05 Hz, 3H); <sup>13</sup>C NMR (75 MHz, CDCl<sub>3</sub>, reference peak CDCl<sub>3</sub> at 77.23 ppm): δ 99.1, 71.0, 67.9, 66.3, 62.6, 31.0, 30.04, 29.97, 29.8, 29.71, 29.69, 26.5, 26.4, 25.7, 19.9, 15.5; LRMS (ESI) *m/z* calcd for C<sub>17</sub>H<sub>34</sub>NaO<sub>3</sub> [M+Na]<sup>+</sup>: 309.2, found: 309.4.

**Compound 14e:** Compound **14e** was synthesized from **13e** (500 mg, 1.98 mmol) with the procedure C and obtained as colorless oil. Yield: 75% (319.7 mg, 1.48 mmol); <sup>1</sup>H NMR (300 MHz, CDCl<sub>3</sub>, reference peak CDCl<sub>3</sub> at 7.26 ppm): δ 4.57–4.55 (m, 1H), 3.88–3.80 (m, 1H), 3.77–3.70 (m, 1H), 3.51–3.32 (m, 6H), 1.85–1.75 (m, 1H), 1.73–1.62 (m, 5H), 1.60–1.46 (m, 6H), 0.89 (t, *J* = 7.35 Hz, 3H); <sup>13</sup>C NMR (75 MHz, CDCl<sub>3</sub>, reference peak CDCl<sub>3</sub> at 77.23 ppm): δ 99.0, 72.7, 70.8, 67.5, 62.4, 30.9, 26.8, 26.7, 25.7, 23.1, 19.8, 10.8; LRMS (ESI) *m/z* calcd for C<sub>12</sub>H<sub>24</sub>NaO<sub>3</sub> [M+Na]<sup>+</sup>: 239.2, found: 239.3.

**Compound 14f:** Compound **14f** was synthesized from **13f** (400 mg, 1.43 mmol) with the procedure C and obtained as colorless oil. Yield: 96% (333.3 mg, 1.36 mmol); <sup>1</sup>H NMR (300 MHz, CDCl<sub>3</sub>, reference peak CDCl<sub>3</sub> at 7.26 ppm): δ 4.58–4.55 (m, 1H), 3.90–3.82 (m, 1H), 3.73 (dt, *J* = 9.6, 6.9 Hz, 1H), 3.53–3.45 (m, 1H), 3.42–3.33 (m, 5H), 1.86–1.77 (m, 1H), 1.75–1.67 (m, 1H), 1.66–1.48 (m, 10H), 1.43–1.35 (m, 4H), 0.91 (t, *J* = 7.35 Hz, 3H); <sup>13</sup>C NMR (75 MHz, CDCl<sub>3</sub>, reference peak CDCl<sub>3</sub> at 77.23 ppm): δ 99.1, 72.8, 71.0, 67.8, 62.6, 31.0, 29.9, 26.4, 26.3, 25.7, 23.2, 19.9, 10.8; LRMS (ESI) *m/z* calcd for C<sub>14</sub>H<sub>28</sub>NaO<sub>3</sub> [M+Na]<sup>+</sup>: 267.2, found: 267.4.

**Compound 14g:** Compound **14g** was synthesized from **13g** (400 mg, 1.30 mmol) with the procedure C and obtained as colorless oil. Yield: 93% (329.4 mg, 1.21 mmol); <sup>1</sup>H NMR (300 MHz, CDCl<sub>3</sub>, reference peak CDCl<sub>3</sub> at 7.26 ppm): δ 4.58–4.55 (m, 1H), 3.90–3.83 (m, 1H), 3.72 (dt, *J* = 9.6, 6.9 Hz, 1H), 3.53–3.47 (m, 1H), 3.41–3.33 (m, 5H), 1.85–1.79 (m, 1H), 1.75–1.67 (m, 1H), 1.64–1.48 (m, 10H), 1.32 (m, 8H), 0.91 (t, *J* = 7.5 Hz, 3H); <sup>13</sup>C NMR (75 MHz, CDCl<sub>3</sub>, reference peak CDCl<sub>3</sub> at 77.23 ppm): δ 99.1, 72.8, 71.1, 67.9, 62.6, 31.0, 29.98, 29.95, 29.7, 26.39, 26.36, 25.7, 23.2, 19.9, 10.8; LRMS (ESI) *m/z* calcd for C<sub>16</sub>H<sub>32</sub>NaO<sub>3</sub> [M+Na]<sup>+</sup>: 295.2, found: 295.5.

**Compound 14h:** Compound **14h** was synthesized from **13c** (335 mg, 1.04 mmol) with the procedure C and obtained as colorless oil. Yield: 90% (268.9 mg, 0.94 mmol); <sup>1</sup>H NMR (400 MHz, CDCl<sub>3</sub>, reference peak CDCl<sub>3</sub> at 7.26 ppm): δ 4.57–4.56 (m, 1H), 3.89–3.84 (m, 1H), 3.72 (dt, *J* = 9.6, 6.8 Hz, 1H), 3.52–3.47 (m, 1H), 3.40–3.34 (m, 5H), 1.86–1.78 (m, 1H), 1.74–1.68 (m, 1H), 1.63–1.49 (m, 10H), 1.33–1.30 (m, 10H), 0.91 (t, *J* = 7.6 Hz, 3H); <sup>13</sup>C NMR (100 MHz, CDCl<sub>3</sub>, reference peak CDCl<sub>3</sub> at 77.16 ppm): δ 99.0, 72.7, 71.1, 67.8, 62.5, 30.9, 29.93, 29.89, 29.7, 29.59, 29.56, 26.4, 26.3, 25.7, 23.1, 19.8, 10.7; LRMS (ESI) *m/z* calcd for C<sub>17</sub>H<sub>34</sub>NaO<sub>3</sub> [M+Na]<sup>+</sup>: 309.2, found: 309.4.



## D. General synthetic procedure and characterization for compounds 15a–15h

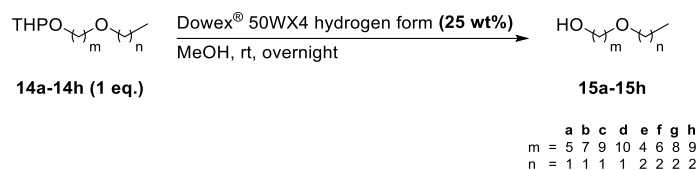

To a solution of **14a–14h** (1 equiv.) in MeOH (0.1 M for **14a–14h**) at r.t. was added Dowex<sup>®</sup> 50WX4 hydrogen form (hydrogen form, 100–200 mesh) (25 wt%), then stirred at r.t. for overnight. After reaction completion checked by TLC, the reaction mixture was filtered and concentrated *in vacuo*. The residue was purified by silica-gel flash column chromatography (11.11% EA in hexane gradient to 22.22%) to obtain the desired compounds **15a–15h**.

**Compound 15a:** Compound **15a** was synthesized from **14a** (380.2 mg, 1.76 mmol) with the procedure D and obtained as colorless oil. Yield: 72% (166.5 mg, 1.26 mmol); <sup>1</sup>H NMR (400 MHz, CDCl<sub>3</sub>, reference peak CDCl<sub>3</sub> at 7.26 ppm): δ 3.66–3.65 (m, 2H), 3.50–3.41 (m, 4H), 1.65–1.56 (m, 4H), 1.47–1.38 (m, 3H), 1.20 (t, *J* = 7.0 Hz, 3H); <sup>13</sup>C NMR (100 MHz, CDCl<sub>3</sub>, reference peak CDCl<sub>3</sub> at 77.16 ppm): δ 70.7, 66.3, 63.0, 32.7, 29.6, 22.6, 15.4; LRMS (ESI) *m/z* calcd for C<sub>7</sub>H<sub>17</sub>O<sub>2</sub> [M+H]<sup>+</sup>: 133.1, found: 133.2.

**Compound 15b:** Compound **15b** was synthesized from **14b** (371.4 mg, 1.52 mmol) with the procedure D and obtained as colorless oil. Yield: 64% (156.5 mg, 0.98 mmol); <sup>1</sup>H NMR (400 MHz, CDCl<sub>3</sub>, reference peak CDCl<sub>3</sub> at 7.26 ppm): δ 3.64 (td, *J* = 6.4, 4.4 Hz, 2H), 3.46 (q, *J* = 7.2 Hz, 2H), 3.40 (t, *J* = 6.8 Hz, 2H), 1.59–1.56 (m, 4H), 1.40–1.35 (m, 7H), 1.20 (t, *J* = 7.2 Hz, 3H); <sup>13</sup>C NMR (100 MHz, CDCl<sub>3</sub>, reference peak CDCl<sub>3</sub> at 77.16 ppm): δ 70.9, 66.2, 63.2, 32.9, 29.9, 29.4, 26.3, 25.8, 15.4; LRMS (ESI) *m/z* calcd for C<sub>9</sub>H<sub>21</sub>O<sub>2</sub> [M+H]<sup>+</sup>: 161.2, found: 161.2.

**Compound 15c:** Compound **15c** was synthesized from **14c** (275.2 mg, 1.01 mmol) with the procedure D and obtained as colorless oil. Yield: 94% (178.5 mg, 0.95 mmol); <sup>1</sup>H NMR (400 MHz, CDCl<sub>3</sub>, reference peak CDCl<sub>3</sub> at 7.26 ppm): δ 3.63 (m, 2H), 3.46 (q, *J* = 7.2 Hz, 2H), 3.40 (t, *J* = 7.0 Hz, 2H), 1.58–1.53 (m, 4H), 1.30 (m, 11H), 1.20 (t, *J* = 7.2 Hz, 3H); <sup>13</sup>C NMR (100 MHz, CDCl<sub>3</sub>, reference peak CDCl<sub>3</sub> at 77.16 ppm): δ 70.9, 66.2, 63.2, 32.9, 30.0, 29.7, 29.6, 29.5, 26.3, 25.9, 15.4; LRMS (ESI) *m/z* calcd for C<sub>11</sub>H<sub>25</sub>O<sub>2</sub> [M+H]<sup>+</sup>: 189.2, found: 189.2.

**Compound 15d:** Compound **15d** was synthesized from **14d** (290 mg, 1.01 mmol) with the procedure D and obtained as colorless oil. Yield: 96% (196.3 mg, 0.97 mmol); <sup>1</sup>H NMR (400 MHz, CDCl<sub>3</sub>, reference peak CDCl<sub>3</sub> at 7.26 ppm): δ 3.63 (t, *J* = 6.4 Hz, 2H), 3.46 (q, *J* = 7.2 Hz, 2H), 3.39 (t, *J* = 7.0 Hz, 2H), 1.57–1.52 (m, 4H), 1.34–1.29 (m, 13H), 1.19 (t, *J* = 7.2 Hz, 3H); <sup>13</sup>C NMR (100 MHz, CDCl<sub>3</sub>, reference peak CDCl<sub>3</sub> at 77.23 ppm): δ 71.0, 66.3, 63.3, 33.0, 30.0, 29.73, 29.71, 29.69, 29.6, 26.4, 25.9, 15.4; LRMS (ESI) *m/z* calcd for C<sub>12</sub>H<sub>27</sub>O<sub>2</sub> [M+H]<sup>+</sup>: 203.2, found: 203.2.

**Compound 15e:** Compound **15e** was synthesized from **14e** (290 mg, 1.3222 mmol) with the procedure D and obtained as colorless oil. Yield: 90% (157.9 mg, 1.1944 mmol); <sup>1</sup>H NMR (300 MHz, CDCl<sub>3</sub>, reference peak CDCl<sub>3</sub> at 7.26 ppm): δ 3.63 (m, 2H), 3.47–3.43 (m, 2H), 3.39 (t, *J* = 6.75 Hz, 2H), 2.73 (br s, 1H), 1.70–1.53 (m, 6H), 0.91 (t, *J* = 7.5 Hz, 3H); <sup>13</sup>C NMR (75 MHz, CDCl<sub>3</sub>, reference peak CDCl<sub>3</sub> at 77.23 ppm): δ 73.0, 71.1, 62.9, 30.7, 27.2, 23.0, 10.8; LRMS (ESI) *m/z* calcd for C<sub>7</sub>H<sub>17</sub>O<sub>2</sub> [M+H]<sup>+</sup>: 133.1, found: 133.2.

**Compound 15f:** Compound **15f** was synthesized from **14f** (320 mg, 1.31 mmol) with the procedure D and obtained as colorless oil. Yield: 97% (204.2 mg, 1.27 mmol); <sup>1</sup>H NMR (400 MHz, CDCl<sub>3</sub>, reference peak CDCl<sub>3</sub> at 7.26 ppm): δ 3.63 (t, *J* = 6.6 Hz, 2H), 3.40 (t, *J* = 6.8 Hz, 2H), 3.35 (t, *J* = 6.8 Hz, 2H), 1.62–1.54 (m, 6H), 1.41–1.36 (m, 5H), 0.91 (t, *J* = 7.4 Hz, 3H); <sup>13</sup>C NMR (100 MHz, CDCl<sub>3</sub>, reference peak CDCl<sub>3</sub> at 77.23 ppm): δ 72.8, 71.0, 63.1, 32.9, 29.9, 26.2, 25.8, 23.1, 10.8; LRMS (ESI) *m/z* calcd for C<sub>9</sub>H<sub>21</sub>O<sub>2</sub> [M+H]<sup>+</sup>: 161.2, found: 161.2.

**Compound 15g:** Compound **15g** was synthesized from **14g** (315 mg, 1.16 mmol) with the procedure D and obtained as colorless oil. Yield: 92% (201.1 mg, 1.07 mmol); <sup>1</sup>H NMR (400 MHz, CDCl<sub>3</sub>, reference peak CDCl<sub>3</sub> at 7.26 ppm): δ 3.63 (t, *J* = 6.6 Hz, 2H), 3.41–3.34 (m, 4H), 1.63–1.53 (m, 6H), 1.32 (m, 9H), 0.91 (t, *J* = 7.6 Hz,

3H);  $^{13}\text{C}$  NMR (100 MHz,  $\text{CDCl}_3$ , reference peak  $\text{CDCl}_3$  at 77.23 ppm):  $\delta$  72.8, 71.1, 63.2, 33.0, 30.0, 29.65, 29.57, 26.3, 25.9, 23.1, 10.8; LRMS (ESI)  $m/z$  calcd for  $\text{C}_{11}\text{H}_{25}\text{O}_2$   $[\text{M}+\text{H}]^+$ : 189.2, found: 189.2.

**Compound 15h:** Compound **15h** was synthesized from **14h** (335.7 mg, 1.17 mmol) with the procedure D and obtained as colorless oil. Yield: 83% (195.9 mg, 0.97 mmol);  $^1\text{H}$  NMR (400 MHz,  $\text{CDCl}_3$ , reference peak  $\text{CDCl}_3$  at 7.26 ppm):  $\delta$  3.63 (td,  $J = 6.2, 4.8$  Hz, 2H), 3.41–3.34 (m, 4H), 1.63–1.53 (m, 6H), 1.30 (m, 11H), 0.91 (t,  $J = 7.6$  Hz, 3H);  $^{13}\text{C}$  NMR (100 MHz,  $\text{CDCl}_3$ , reference peak  $\text{CDCl}_3$  at 77.16 ppm):  $\delta$  72.7, 71.1, 63.2, 32.9, 29.9, 29.7, 29.6, 29.5, 26.3, 25.9, 23.1, 10.7; LRMS (ESI)  $m/z$  calcd for  $\text{C}_{12}\text{H}_{27}\text{O}_2$   $[\text{M}+\text{H}]^+$ : 203.2, found: 203.2.

## E. General synthetic procedure and characterization for compounds 16a–16h

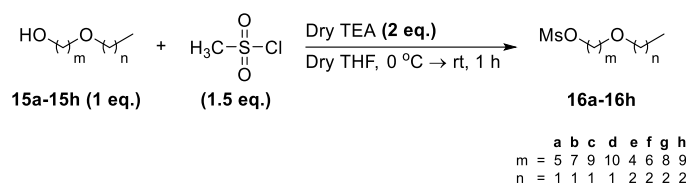

To a solution of **15a–15h** (1 equiv.) in dry THF (0.1 M for **15a–15h**) at 0 °C were added MsCl (1.5 equiv.) and dry TEA (2 equiv.) under Ar(g), then stirred at r.t. for 1 h. After reaction completion checked by TLC, the reaction mixture was filtered with EA and concentrated *in vacuo*. The residue was purified by silica-gel flash column chromatography (25% EA in hexane gradient to 33%) to obtain the desired compounds **16a–16h**.

**Compound 16a:** Compound **16a** was synthesized from **15a** (160.9 mg, 1.22 mmol) with the procedure E and obtained as colorless oil. Yield: quantitative (259.1 mg, 1.23 mmol);  $^1\text{H}$  NMR (400 MHz,  $\text{CDCl}_3$ , reference peak  $\text{CDCl}_3$  at 7.26 ppm):  $\delta$  4.23 (t,  $J = 6.6$  Hz, 2H), 3.49–3.40 (m, 4H), 3.00 (s, 3H), 1.82–1.75 (m, 2H), 1.63–1.58 (m, 2H), 1.52–1.46 (m, 2H), 1.19 (t,  $J = 7.2$  Hz, 3H);  $^{13}\text{C}$  NMR (100 MHz,  $\text{CDCl}_3$ , reference peak  $\text{CDCl}_3$  at 77.16 ppm):  $\delta$  70.3, 70.1, 66.3, 37.5, 29.3, 29.1, 22.4, 15.4; LRMS (ESI)  $m/z$  calcd for  $\text{C}_8\text{H}_{19}\text{O}_4\text{S}$   $[\text{M}+\text{H}]^+$ : 211.1, found: 211.1.

**Compound 16b:** Compound **16b** was synthesized from **15b** (151 mg, 0.94 mmol) with the procedure E and obtained as colorless oil. Yield: 99% (223.4 mg, 0.94 mmol);  $^1\text{H}$  NMR (400 MHz,  $\text{CDCl}_3$ , reference peak  $\text{CDCl}_3$  at 7.26 ppm):  $\delta$  4.22 (t,  $J = 6.6$  Hz, 2H), 3.46 (q,  $J = 7.2$  Hz, 2H), 3.40 (t,  $J = 6.8$  Hz, 2H), 3.00 (s, 3H), 1.78–1.71 (m, 2H), 1.60–1.54 (m, 2H), 1.44–1.35 (m, 6H), 1.19 (t,  $J = 7.2$  Hz, 3H);  $^{13}\text{C}$  NMR (100 MHz,  $\text{CDCl}_3$ , reference peak  $\text{CDCl}_3$  at 77.16 ppm):  $\delta$  70.7, 70.2, 66.2, 37.5, 29.8, 29.2, 29.0, 26.2, 25.5, 15.4; LRMS (ESI)  $m/z$  calcd for  $\text{C}_{10}\text{H}_{23}\text{O}_4\text{S}$   $[\text{M}+\text{H}]^+$ : 239.1, found: 239.2.

**Compound 16c:** Compound **16c** was synthesized from **15c** (178.5 mg, 0.95 mmol) with the procedure E and obtained as colorless oil. Yield: quantitative (262.2 mg, 0.98 mmol);  $^1\text{H}$  NMR (400 MHz,  $\text{CDCl}_3$ , reference peak  $\text{CDCl}_3$  at 7.26 ppm):  $\delta$  4.22 (t,  $J = 6.6$  Hz, 2H), 3.46 (q,  $J = 7.2$  Hz, 2H), 3.40 (t,  $J = 6.8$  Hz, 2H), 3.00 (s, 3H), 1.78–1.71 (m, 2H), 1.58–1.53 (m, 2H), 1.41–1.31 (m, 10H), 1.20 (t,  $J = 7.2$  Hz, 3H);  $^{13}\text{C}$  NMR (100 MHz,  $\text{CDCl}_3$ , reference peak  $\text{CDCl}_3$  at 77.16 ppm):  $\delta$  70.9, 70.3, 66.2, 37.5, 29.9, 29.5, 29.3, 29.1, 26.3, 25.5, 15.4; LRMS (ESI)  $m/z$  calcd for  $\text{C}_{12}\text{H}_{27}\text{O}_4\text{S}$   $[\text{M}+\text{H}]^+$ : 267.2, found: 267.2.

**Compound 16d:** Compound **16d** was synthesized from **15d** (185 mg, 0.91 mmol) with the procedure E and obtained as colorless oil. Yield: quantitative (256.3 mg, 0.91 mmol);  $^1\text{H}$  NMR (300 MHz,  $\text{CDCl}_3$ , reference peak  $\text{CDCl}_3$  at 7.26 ppm):  $\delta$  4.21 (t,  $J = 6.6$  Hz, 2H), 3.46 (q,  $J = 7.2$  Hz, 2H), 3.39 (t,  $J = 6.75$  Hz, 2H), 3.00 (s, 3H), 1.79–1.69 (m, 2H), 1.60–1.51 (m, 2H), 1.41–1.25 (m, 12H), 1.19 (t,  $J = 7.2$  Hz, 3H);  $^{13}\text{C}$  NMR (75 MHz,  $\text{CDCl}_3$ , reference peak  $\text{CDCl}_3$  at 77.23 ppm):  $\delta$  71.0, 70.4, 66.3, 37.6, 30.0, 29.6, 29.5, 29.3, 29.2, 26.4, 25.6, 15.5; LRMS (ESI)  $m/z$  calcd for  $\text{C}_{13}\text{H}_{29}\text{O}_4\text{S}$   $[\text{M}+\text{H}]^+$ : 281.2, found: 281.2.

**Compound 16e:** Compound **16e** was synthesized from **15e** (147 mg, 1.11 mmol) with the procedure E and obtained as colorless oil. Yield: 98% (230 mg, 1.09 mmol);  $^1\text{H}$  NMR (300 MHz,  $\text{CDCl}_3$ , reference peak  $\text{CDCl}_3$  at 7.26 ppm):  $\delta$  4.27 (t,  $J = 6.3$  Hz, 2H), 3.44 (t,  $J = 6.0$  Hz, 2H), 3.36 (t,  $J = 6.75$  Hz, 2H), 3.00 (s, 3H), 1.90–1.81

(m, 2H), 1.73–1.52 (m, 4H), 0.91 (t,  $J = 7.5$  Hz, 3H);  $^{13}\text{C}$  NMR (75 MHz,  $\text{CDCl}_3$ , reference peak  $\text{CDCl}_3$  at 77.23 ppm):  $\delta$  72.9, 70.2, 70.0, 37.6, 26.5, 25.9, 23.1, 10.8; LRMS (ESI)  $m/z$  calcd for  $\text{C}_8\text{H}_{19}\text{O}_4\text{S}$   $[\text{M}+\text{H}]^+$ : 211.1, found: 211.1.

**Compound 16f:** Compound **16f** was synthesized from **15f** (194 mg, 1.21 mmol) with the procedure E and obtained as colorless oil. Yield: 99% (285.5 mg, 1.20 mmol);  $^1\text{H}$  NMR (300 MHz,  $\text{CDCl}_3$ , reference peak  $\text{CDCl}_3$  at 7.26 ppm):  $\delta$  4.22 (t,  $J = 6.6$  Hz, 2H), 3.42–3.33 (m, 4H), 2.99 (s, 3H), 1.80–1.71 (m, 2H), 1.64–1.52 (m, 4H), 1.45–1.37 (m, 4H), 0.91 (t,  $J = 7.35$  Hz, 3H);  $^{13}\text{C}$  NMR (75 MHz,  $\text{CDCl}_3$ , reference peak  $\text{CDCl}_3$  at 77.23 ppm):  $\delta$  72.8, 70.7, 70.3, 37.6, 29.8, 29.3, 25.9, 25.5, 23.1, 10.8; LRMS (ESI)  $m/z$  calcd for  $\text{C}_{10}\text{H}_{23}\text{O}_4\text{S}$   $[\text{M}+\text{H}]^+$ : 239.1, found: 239.2.

**Compound 16g:** Compound **16g** was synthesized from **15g** (259.3 mg, 1.38 mmol) with the procedure E and obtained as colorless oil. Yield: 98% (360.9 mg, 1.35 mmol);  $^1\text{H}$  NMR (300 MHz,  $\text{CDCl}_3$ , reference peak  $\text{CDCl}_3$  at 7.26 ppm):  $\delta$  4.21 (t,  $J = 6.6$  Hz, 2H), 3.41–3.33 (m, 4H), 3.00 (s, 3H), 1.79–1.69 (m, 2H), 1.64–1.52 (m, 4H), 1.42–1.33 (m, 8H), 0.91 (t,  $J = 7.5$  Hz, 3H);  $^{13}\text{C}$  NMR (75 MHz,  $\text{CDCl}_3$ , reference peak  $\text{CDCl}_3$  at 77.23 ppm):  $\delta$  72.8, 71.0, 70.4, 37.6, 29.9, 29.5, 29.3, 29.2, 26.3, 25.6, 23.1, 10.8; LRMS (ESI)  $m/z$  calcd for  $\text{C}_{12}\text{H}_{27}\text{O}_4\text{S}$   $[\text{M}+\text{H}]^+$ : 267.2, found: 267.2.

**Compound 16h:** Compound **16h** was synthesized from **15h** (186.5 mg, 0.92 mmol) with the procedure E and obtained as colorless oil. Yield: quantitative (281 mg, 1.00 mmol);  $^1\text{H}$  NMR (400 MHz,  $\text{CDCl}_3$ , reference peak  $\text{CDCl}_3$  at 7.26 ppm):  $\delta$  4.22 (t,  $J = 6.4$  Hz, 2H), 3.41–3.34 (m, 4H), 3.00 (s, 3H), 1.78–1.71 (m, 2H), 1.63–1.53 (m, 4H), 1.41–1.31 (m, 10H), 0.91 (t,  $J = 7.4$  Hz, 3H);  $^{13}\text{C}$  NMR (100 MHz,  $\text{CDCl}_3$ , reference peak  $\text{CDCl}_3$  at 77.16 ppm):  $\delta$  72.7, 71.0, 70.3, 37.5, 29.9, 29.5, 29.3, 29.1, 26.3, 25.5, 23.1, 10.7; LRMS (ESI)  $m/z$  calcd for  $\text{C}_{13}\text{H}_{29}\text{O}_4\text{S}$   $[\text{M}+\text{H}]^+$ : 281.2, found: 281.2.

## F. General synthetic procedure and characterization for compounds 18a–18h

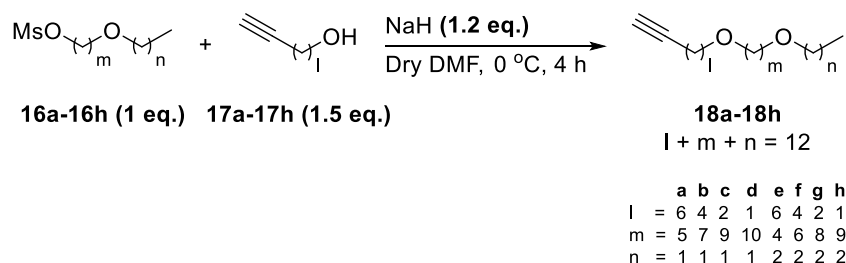

To a solution of NaH (1.2 equiv.) in dry DMF at 0 °C was added **17a–17h** (1.5 equiv.) in dry DMF under Ar(g), then stirred at 0 °C for 5 min. To the reaction mixture was added **16a–16h** (1 equiv.) in dry DMF. The concentration of the reaction mixture was 0.1 M for **16a–16h**. After being stirred at 0 °C for 4 h, the reaction mixture was quenched with saturated  $\text{NH}_4\text{Cl}$ (aq.). The resultant was extracted with EA three times. The combined organic layer was dried over anhydrous  $\text{Na}_2\text{SO}_4$ (s) and concentrated *in vacuo* after filtration. The resultant was evaporated with toluene twice to remove DMF. The residue was purified by silica-gel flash column chromatography (4.76% EA in hexane gradient to 33.33%) to obtain the desired compounds **18a–18h** and recover starting materials **16a–16h**.

**Compound 18a:** Compound **18a** was synthesized from **16a** (259.1 mg, 1.23 mmol) with the procedure F and obtained as colorless oil. Yield: 47% (137.6 mg, 0.57 mmol);  $^1\text{H}$  NMR (400 MHz,  $\text{CDCl}_3$ , reference peak  $\text{CDCl}_3$  at 7.26 ppm):  $\delta$  3.49–3.37 (m, 8H), 2.18 (td,  $J = 7.0, 2.4$  Hz, 2H), 1.93 (t,  $J = 2.4$  Hz, 1H), 1.63–1.50 (m, 8H), 1.45–1.31 (m, 6H), 1.19 (t,  $J = 6.8$  Hz, 3H);  $^{13}\text{C}$  NMR (100 MHz,  $\text{CDCl}_3$ , reference peak  $\text{CDCl}_3$  at 77.16 ppm):  $\delta$  84.8, 70.97, 70.95, 70.8, 68.3, 66.2, 29.78, 29.75, 28.7, 28.6, 25.9, 23.0, 18.5, 15.4; LRMS (ESI)  $m/z$  calcd for  $\text{C}_{15}\text{H}_{29}\text{O}_2$   $[\text{M}+\text{H}]^+$ : 241.2, found: 241.2.

**Compound 18b:** Compound **18b** was synthesized from **16b** (156.3 mg, 0.66 mmol) with the procedure F and obtained as colorless oil. Yield: 51% (81.1 mg, 0.34 mmol); <sup>1</sup>H NMR (400 MHz, CDCl<sub>3</sub>, reference peak CDCl<sub>3</sub> at 7.26 ppm): δ 3.49–3.37 (m, 8H), 2.22 (td, *J* = 6.8, 2.4 Hz, 2H), 1.94 (t, *J* = 2.4 Hz, 1H), 1.72–1.54 (m, 8H), 1.33–1.28 (m, 6H), 1.19 (t, *J* = 7.0 Hz, 3H); <sup>13</sup>C NMR (100 MHz, CDCl<sub>3</sub>, reference peak CDCl<sub>3</sub> at 77.16 ppm): δ 84.6, 71.1, 70.9, 70.3, 68.5, 66.2, 29.9, 29.8, 29.5, 28.9, 26.31, 26.29, 25.4, 18.4, 15.4; LRMS (ESI) *m/z* calcd for C<sub>15</sub>H<sub>29</sub>O<sub>2</sub> [M+H]<sup>+</sup>: 241.2, found: 241.3.

**Compound 18c:** Compound **18c** was synthesized from **16c** (249.3 mg, 0.94 mmol) with the procedure F and obtained as colorless oil. Yield: 76% (172.2 mg, 0.72 mmol); <sup>1</sup>H NMR (500 MHz, CDCl<sub>3</sub>, reference peak CDCl<sub>3</sub> at 7.26 ppm): δ 3.54 (t, *J* = 7.0 Hz, 2H), 3.47–3.42 (m, 4H), 3.38 (t, *J* = 7.0 Hz, 2H), 2.45 (td, *J* = 7.0, 2.5 Hz, 2H), 1.96 (t, *J* = 2.5 Hz, 1H), 1.58–1.52 (m, 4H), 1.33–1.28 (m, 10H), 1.19 (t, *J* = 7.0 Hz, 3H); <sup>13</sup>C NMR (125 MHz, CDCl<sub>3</sub>, reference peak CDCl<sub>3</sub> at 77.16 ppm): δ 81.6, 71.3, 70.9, 69.3, 68.9, 66.2, 30.0, 29.8, 29.7, 29.6, 29.5, 26.3, 26.2, 20.0, 15.4; LRMS (ESI) *m/z* calcd for C<sub>15</sub>H<sub>29</sub>O<sub>2</sub> [M+H]<sup>+</sup>: 241.2, found: 241.2.

**Compound 18d:** Compound **18d** was synthesized from **16d** (192 mg, 0.69 mmol) with the procedure F and obtained as colorless oil. Yield: 90% (156.7 mg, 0.65 mmol); <sup>1</sup>H NMR (300 MHz, CDCl<sub>3</sub>, reference peak CDCl<sub>3</sub> at 7.26 ppm): δ 4.13 (d, *J* = 2.4 Hz, 2H), 3.50 (t, *J* = 6.6 Hz, 2H), 3.46 (q, *J* = 7.2 Hz, 2H), 3.39 (t, *J* = 6.75 Hz, 2H), 2.41 (t, *J* = 2.4 Hz, 1H), 1.63–1.51 (m, 4H), 1.28 (m, 12H), 1.19 (t, *J* = 7.2 Hz, 3H); <sup>13</sup>C NMR (75 MHz, CDCl<sub>3</sub>, reference peak CDCl<sub>3</sub> at 77.23 ppm): δ 80.3, 74.2, 71.0, 70.5, 66.3, 58.2, 30.0, 29.7, 29.6, 26.4, 26.3, 15.5; LRMS (ESI) *m/z* calcd for C<sub>15</sub>H<sub>29</sub>O<sub>2</sub> [M+H]<sup>+</sup>: 241.2, found: 241.2.

**Compound 18e:** Compound **18e** was synthesized from **16e** (220 mg, 1.05 mmol) with the procedure F and obtained as colorless oil. Yield: 29% (72.1 mg, 0.30 mmol); <sup>1</sup>H NMR (400 MHz, CDCl<sub>3</sub>, reference peak CDCl<sub>3</sub> at 7.26 ppm): δ 3.42–3.34 (m, 8H), 2.18 (td, *J* = 7.0, 2.8 Hz, 2H), 1.93 (t, *J* = 2.8 Hz, 1H), 1.64–1.50 (m, 10H), 1.45–1.34 (m, 4H), 0.91 (t, *J* = 7.6 Hz, 3H); <sup>13</sup>C NMR (100 MHz, CDCl<sub>3</sub>, reference peak CDCl<sub>3</sub> at 77.23 ppm): δ 84.9, 72.8, 71.0, 70.9, 70.8, 68.3, 29.9, 28.8, 28.6, 26.7, 25.9, 23.2, 18.6, 10.8; LRMS (ESI) *m/z* calcd for C<sub>15</sub>H<sub>29</sub>O<sub>2</sub> [M+H]<sup>+</sup>: 241.2, found: 241.2.

**Compound 18f:** Compound **18f** was synthesized from **16f** (241.9 mg, 1.02 mmol) with the procedure F and obtained as colorless oil. Yield: 48% (117.8 mg, 0.49 mmol); <sup>1</sup>H NMR (300 MHz, CDCl<sub>3</sub>, reference peak CDCl<sub>3</sub> at 7.26 ppm): δ 3.44–3.33 (m, 8H), 2.21 (td, *J* = 6.9, 2.7 Hz, 2H), 1.94 (t, *J* = 2.7 Hz, 1H), 1.73–1.52 (m, 10H), 1.38–1.33 (m, 4H), 0.91 (t, *J* = 7.5 Hz, 3H); <sup>13</sup>C NMR (75 MHz, CDCl<sub>3</sub>, reference peak CDCl<sub>3</sub> at 77.23 ppm): δ 84.6, 72.8, 71.1, 71.0, 70.4, 68.5, 30.0, 29.0, 26.3, 25.5, 23.2, 18.5, 10.8; LRMS (ESI) *m/z* calcd for C<sub>15</sub>H<sub>29</sub>O<sub>2</sub> [M+H]<sup>+</sup>: 241.2, found: 241.3.

**Compound 18g:** Compound **18g** was synthesized from **16g** (200 mg, 0.75 mmol) with the procedure F and obtained as colorless oil. Yield: 36% (80.1 mg, 0.33 mmol); <sup>1</sup>H NMR (500 MHz, CDCl<sub>3</sub>, reference peak CDCl<sub>3</sub> at 7.26 ppm): δ 3.54 (t, *J* = 7.25 Hz, 2H), 3.44 (t, *J* = 7.0 Hz, 2H), 3.38 (t, *J* = 7.0 Hz, 2H), 3.35 (t, *J* = 7.0 Hz, 2H), 2.45 (td, *J* = 7.25, 2.5 Hz, 2H), 1.97 (t, *J* = 2.5 Hz, 1H), 1.61–1.53 (m, 6H), 1.34–1.28 (m, 8H), 0.91 (t, *J* = 7.25 Hz, 3H); <sup>13</sup>C NMR (75 MHz, CDCl<sub>3</sub>, reference peak CDCl<sub>3</sub> at 77.23 ppm): δ 81.6, 72.8, 71.4, 71.1, 69.4, 69.0, 30.0, 29.8, 29.64, 29.61, 26.4, 26.2, 23.2, 20.1, 10.8; LRMS (ESI) *m/z* calcd for C<sub>15</sub>H<sub>29</sub>O<sub>2</sub> [M+H]<sup>+</sup>: 241.2, found: 241.3.

**Compound 18h:** Compound **18h** was synthesized from **16h** (269.1 mg, 0.96 mmol) with the procedure F and obtained as colorless oil. Yield: 81% (187.5 mg, 0.78 mmol); <sup>1</sup>H NMR (400 MHz, CDCl<sub>3</sub>, reference peak CDCl<sub>3</sub> at 7.26 ppm): δ 4.13 (d, *J* = 2.4 Hz, 2H), 3.50 (t, *J* = 6.6 Hz, 2H), 3.41–3.34 (m, 4H), 2.41 (t, *J* = 2.4 Hz, 1H), 1.63–1.52 (m, 6H), 1.30 (m, 10H), 0.91 (t, *J* = 7.6 Hz, 3H); <sup>13</sup>C NMR (100 MHz, CDCl<sub>3</sub>, reference peak CDCl<sub>3</sub> at 77.16 ppm): δ 80.2, 74.2, 72.7, 71.1, 70.4, 58.1, 29.9, 29.65, 29.57, 29.5, 26.3, 26.2, 23.1, 10.7; LRMS (ESI) *m/z* calcd for C<sub>15</sub>H<sub>29</sub>O<sub>2</sub> [M+H]<sup>+</sup>: 241.2, found: 241.2.

## G. General synthetic procedure and characterization for compounds 19a–19h

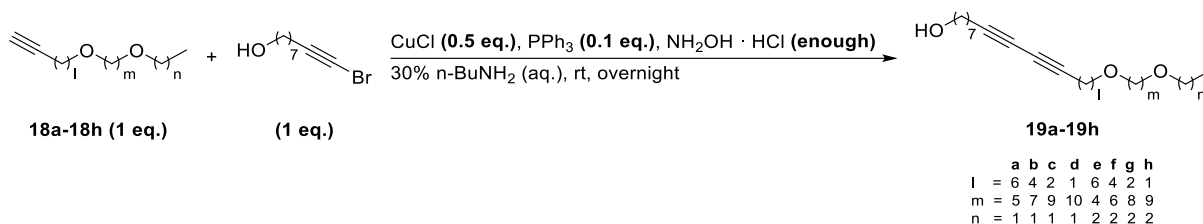

To a solution of CuCl (0.5 equiv.) and PPh<sub>3</sub> (0.1 equiv.) in 30% *n*-BuNH<sub>2</sub>(aq.) with NH<sub>2</sub>OH·HCl at r.t. was added **18a–18h** (1 equiv.) in 30% *n*-BuNH<sub>2</sub>(aq.) with NH<sub>2</sub>OH·HCl under Ar(g). To the reaction mixture was added 9-bromonon-8-yn-1-ol<sup>1)</sup> (1 equiv.) in 30% *n*-BuNH<sub>2</sub>(aq.) with NH<sub>2</sub>OH·HCl over 4 h, then 30% *n*-BuNH<sub>2</sub>(aq.) with NH<sub>2</sub>OH·HCl was added over overnight to prevent Cu (I) oxidation. The concentration of the reaction mixture was 0.05 M for **18a–18h**. After reaction completion checked by TLC, the reaction mixture was neutralized with 2N HCl and checked by pH paper until pH became below 7. The resultant was extracted with EA three times. The combined organic layer was dried over anhydrous Na<sub>2</sub>SO<sub>4</sub>(s) and concentrated *in vacuo* after filtration. The residue was purified by silica-gel flash column chromatography (4.76% EA in hexane gradient to 33.33%) to obtain the desired compounds **19a–19h**.

**Compound 19a:** Compound **19a** was synthesized from **18a** (193 mg, 0.80 mmol) with the procedure G and obtained as white solid. Yield: 44% (133 mg, 0.35 mmol); <sup>1</sup>H NMR (400 MHz, CD<sub>2</sub>Cl<sub>2</sub>, reference peak CD<sub>2</sub>Cl<sub>2</sub> at 5.32 ppm): δ 3.58 (t, *J* = 6.6 Hz, 2H), 3.45–3.36 (m, 8H), 2.24 (t, *J* = 6.8 Hz, 4H), 1.54–1.51 (m, 13H), 1.38–1.33 (m, 12H), 1.15 (t, *J* = 7.0 Hz, 3H); <sup>13</sup>C NMR (100 MHz, CD<sub>2</sub>Cl<sub>2</sub>, reference peak CD<sub>2</sub>Cl<sub>2</sub> at 53.84 ppm): δ 77.9, 71.09, 71.05, 70.9, 66.3, 65.5, 63.1, 33.2, 30.1, 30.0, 29.3, 29.2, 29.1, 28.8, 28.7, 26.1, 26.0, 23.3, 19.5, 19.4, 15.5; LRMS (ESI) *m/z* calcd for C<sub>24</sub>H<sub>43</sub>O<sub>3</sub> [M+H]<sup>+</sup>: 379.3, found: 379.4.

**Compound 19b:** Compound **19b** was synthesized from **18b** (95.8 mg, 0.44 mmol) with the procedure G and obtained as white solid. Yield: 27% (44.6 mg, 0.12 mmol); <sup>1</sup>H NMR (400 MHz, CD<sub>2</sub>Cl<sub>2</sub>, reference peak CD<sub>2</sub>Cl<sub>2</sub> at 5.32 ppm): δ 3.58 (t, *J* = 6.4 Hz, 2H), 3.45–3.34 (m, 8H), 2.29–2.22 (m, 4H), 1.64–1.48 (m, 13H), 1.42–1.32 (m, 12H), 1.15 (t, *J* = 7.0 Hz, 3H); <sup>13</sup>C NMR (100 MHz, CD<sub>2</sub>Cl<sub>2</sub>, reference peak CD<sub>2</sub>Cl<sub>2</sub> at 53.84 ppm): δ 78.0, 77.7, 71.2, 71.0, 70.4, 66.3, 65.7, 65.5, 63.1, 33.2, 30.2, 30.1, 29.7, 29.31, 29.26, 29.2, 28.7, 26.58, 26.56, 26.0, 25.6, 19.4, 19.3, 15.5; LRMS (ESI) *m/z* calcd for C<sub>24</sub>H<sub>43</sub>O<sub>3</sub> [M+H]<sup>+</sup>: 379.3, found: 379.3.

**Compound 19c:** Compound **19c** was synthesized from **18c** (171.1 mg, 0.71 mmol) with the procedure G and obtained as white solid. Yield: 37% (100.4 mg, 0.27 mmol); <sup>1</sup>H NMR (400 MHz, CDCl<sub>3</sub>, reference peak CDCl<sub>3</sub> at 7.26 ppm): δ 3.63 (t, *J* = 6.6 Hz, 2H), 3.53 (t, *J* = 7.0 Hz, 2H), 3.49–3.38 (m, 6H), 2.52 (t, *J* = 7.0 Hz, 2H), 2.24 (t, *J* = 7.0 Hz, 2H), 1.58–1.48 (m, 8H), 1.43–1.29 (m, 17H), 1.19 (t, *J* = 7.0 Hz, 3H); <sup>13</sup>C NMR (100 MHz, CDCl<sub>3</sub>, reference peak CDCl<sub>3</sub> at 77.16 ppm): δ 78.0, 74.2, 71.3, 70.9, 68.6, 66.4, 66.2, 65.3, 63.1, 32.8, 29.9, 29.74, 29.66, 29.6, 29.5, 29.0, 28.9, 28.3, 26.3, 26.2, 25.7, 20.8, 19.3, 15.4; LRMS (ESI) *m/z* calcd for C<sub>24</sub>H<sub>43</sub>O<sub>3</sub> [M+H]<sup>+</sup>: 379.3, found: 379.4.

**Compound 19d:** Compound **19d** was synthesized from **18d** (180 mg, 0.75 mmol) with the procedure G and obtained as white solid. Yield: 75% (212.8 mg, 0.56 mmol); <sup>1</sup>H NMR (300 MHz, CDCl<sub>3</sub>, reference peak CDCl<sub>3</sub> at 7.26 ppm): δ 4.17 (s, 2H), 3.63 (t, *J* = 6.6 Hz, 2H), 3.51–3.42 (m, 4H), 3.39 (t, *J* = 6.75 Hz, 2H), 2.27 (t, *J* = 6.9 Hz, 2H), 1.58–1.48 (m, 8H), 1.45–1.28 (m, 19H), 1.19 (t, *J* = 7.05 Hz, 3H); <sup>13</sup>C NMR (75 MHz, CDCl<sub>3</sub>, reference peak CDCl<sub>3</sub> at 77.23 ppm): δ 81.2, 72.4, 71.2, 71.0, 70.6, 66.3, 64.8, 63.1, 58.8, 32.9, 30.0, 29.7, 29.6, 29.0, 28.9, 28.3, 26.4, 26.3, 25.8, 19.4, 15.5; LRMS (ESI) *m/z* calcd for C<sub>24</sub>H<sub>43</sub>O<sub>3</sub> [M+H]<sup>+</sup>: 379.3, found: 379.3.

**Compound 19e:** Compound **19e** was synthesized from **18e** (61 mg, 0.25 mmol) with the procedure G and obtained as white solid. Yield: 67% (61.2 mg, 0.16 mmol); <sup>1</sup>H NMR (300 MHz, CDCl<sub>3</sub>, reference peak CDCl<sub>3</sub> at 7.26 ppm): δ 3.63 (td, *J* = 6.3, 3.9 Hz, 2H), 3.44–3.34 (m, 8H), 2.24 (t, *J* = 6.9 Hz, 4H), 1.66–1.48 (m, 14H), 1.45–1.25 (m, 11H), 0.91 (t, *J* = 7.5 Hz, 3H); <sup>13</sup>C NMR (75 MHz, CDCl<sub>3</sub>, reference peak CDCl<sub>3</sub> at 77.23 ppm): δ 72.8, 71.0, 70.9, 70.8, 65.5, 63.2, 32.9, 29.8, 29.1, 29.0, 28.9, 28.5, 28.4, 26.7, 25.9, 25.8, 23.2, 19.39, 19.37, 10.8; LRMS (ESI) *m/z* calcd for C<sub>24</sub>H<sub>43</sub>O<sub>3</sub> [M+H]<sup>+</sup>: 379.3, found: 379.4.

**Compound 19f:** Compound **19f** was synthesized from **18f** (55 mg, 0.23 mmol) with the procedure G and obtained as white solid. Yield: 58% (47.7 mg, 0.13 mmol); <sup>1</sup>H NMR (400 MHz, CDCl<sub>3</sub>, reference peak CDCl<sub>3</sub> at 7.26 ppm): δ 3.63 (t, *J* = 6.8 Hz, 2H), 3.41–3.34 (m, 8H), 2.24 (m, 4H), 1.70–1.48 (m, 15H), 1.43–1.27 (m, 10H), 0.91 (t, *J* = 7.6 Hz, 3H); <sup>13</sup>C NMR (100 MHz, CDCl<sub>3</sub>, reference peak CDCl<sub>3</sub> at 77.16 ppm): δ 77.6, 77.3, 72.7, 71.0, 70.9, 70.3, 65.6, 65.4, 63.1, 32.8, 29.9, 29.8, 29.0, 28.9, 28.3, 26.2, 25.7, 25.3, 23.1, 19.3, 19.2, 10.7; LRMS (ESI) *m/z* calcd for C<sub>24</sub>H<sub>43</sub>O<sub>3</sub> [M+H]<sup>+</sup>: 379.3, found: 379.4.

**Compound 19g:** Compound **19g** was synthesized from **18g** (75 mg, 0.31 mmol) with the procedure G and obtained as white solid. Yield: 70% (78.9 mg, 0.21 mmol); <sup>1</sup>H NMR (300 MHz, CDCl<sub>3</sub>, reference peak CDCl<sub>3</sub> at 7.26 ppm): δ 3.63 (t, *J* = 6.45 Hz, 2H), 3.53 (t, *J* = 7.05 Hz, 2H), 3.45–3.33 (m, 6H), 2.52 (t, *J* = 7.05 Hz, 2H), 2.24 (t, *J* = 6.75 Hz, 2H), 1.64–1.47 (m, 10H), 1.44–1.31 (m, 15H), 0.91 (t, *J* = 7.35 Hz, 3H); <sup>13</sup>C NMR (75 MHz, CDCl<sub>3</sub>, reference peak CDCl<sub>3</sub> at 77.23 ppm): δ 78.1, 74.2, 72.8, 71.4, 71.1, 68.7, 66.5, 65.4, 63.2, 32.9, 30.0, 29.8, 29.64, 29.61, 29.1, 28.9, 28.4, 26.3, 26.2, 25.8, 23.2, 20.8, 19.4, 10.8; LRMS (ESI) *m/z* calcd for C<sub>24</sub>H<sub>43</sub>O<sub>3</sub> [M+H]<sup>+</sup>: 379.3, found: 379.4.

**Compound 19h:** Compound **19h** was synthesized from **18h** (179.2 mg, 0.75 mmol) with the procedure G and obtained as white solid. Yield: 53% (149.1 mg, 0.39 mmol); <sup>1</sup>H NMR (500 MHz, CDCl<sub>3</sub>, reference peak CDCl<sub>3</sub> at 7.26 ppm): δ 4.18 (s, 2H), 3.64 (t, *J* = 6.5 Hz, 2H), 3.49 (t, *J* = 6.5 Hz, 2H), 3.39 (t, *J* = 6.5 Hz, 2H), 3.36 (t, *J* = 6.75 Hz, 2H), 2.27 (t, *J* = 7.0 Hz, 2H), 1.62–1.50 (m, 10H), 1.43–1.29 (m, 17H), 0.91 (t, *J* = 7.75 Hz, 3H); <sup>13</sup>C NMR (125 MHz, CDCl<sub>3</sub>, reference peak CDCl<sub>3</sub> at 77.16 ppm): δ 81.1, 72.7, 72.3, 71.2, 71.1, 70.5, 64.8, 63.1, 58.7, 32.8, 29.9, 29.7, 29.6, 29.5, 29.0, 28.9, 28.2, 26.3, 26.2, 25.7, 23.1, 19.4, 10.7; LRMS (ESI) *m/z* calcd for C<sub>24</sub>H<sub>43</sub>O<sub>3</sub> [M+H]<sup>+</sup>: 379.3, found: 379.3.

## H. General synthetic procedure and characterization for compounds 20a–20h

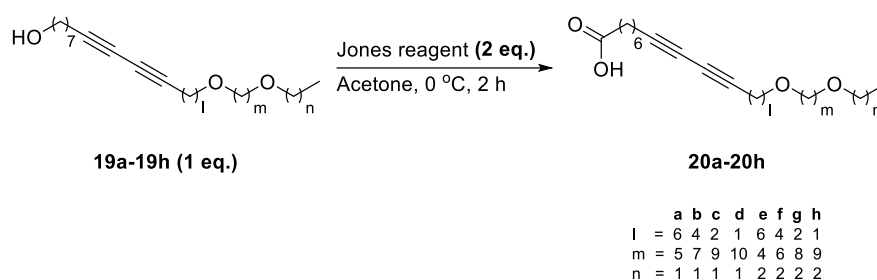

To a solution of **19a–19h** (1 equiv.) in acetone (0.1 M for **19a–19h**) at 0 °C was added Jones reagent (2 equiv.), then stirred at 0 °C for 2 h. After reaction completion checked by TLC, the reaction mixture was quenched with 2N HCl and saturated NH<sub>4</sub>Cl(aq.). The resultant was extracted with EA five times. The combined organic layer was dried over anhydrous Na<sub>2</sub>SO<sub>4</sub>(s) and concentrated *in vacuo* after filtration. The residue was purified by silica-gel flash column chromatography (14.29% EA in hexane with 1% AcOH gradient to 22.22%) to obtain the desired compounds. **20a–20h**.

**Compound 20a:** Compound **20a** was synthesized from **19a** (106.8 mg, 0.28 mmol) with the procedure H and obtained as white solid. Yield: 77% (84.8 mg, 0.22 mmol); <sup>1</sup>H NMR (400 MHz, CDCl<sub>3</sub>, reference peak CDCl<sub>3</sub> at 7.26 ppm): δ 10.15 (br s, 1H), 3.49–3.37 (m, 8H), 2.35 (m, 2H), 2.24 (t, *J* = 6.6 Hz, 4H), 1.65–1.48 (m, 12H), 1.40–1.33 (m, 10H), 1.19 (t, *J* = 7.2 Hz, 3H); <sup>13</sup>C NMR (100 MHz, CDCl<sub>3</sub>, reference peak CDCl<sub>3</sub> at 77.16 ppm): δ 179.4, 77.6, 77.3, 70.9, 70.7, 66.2, 65.5, 65.4, 34.1, 29.8, 29.65, 29.62, 28.7, 28.6, 28.5, 28.3, 28.2, 25.8, 24.6, 22.9, 19.23, 19.21, 15.3; LRMS (ESI) *m/z* calcd for C<sub>24</sub>H<sub>41</sub>O<sub>4</sub> [M+H]<sup>+</sup>: 393.3, found: 393.3.

**Compound 20b:** Compound **20b** was synthesized from **19b** (67 mg, 0.18 mmol) with the procedure H and obtained as white solid. Yield: 48% (33.1 mg, 0.08 mmol); <sup>1</sup>H NMR (400 MHz, CDCl<sub>3</sub>, reference peak CDCl<sub>3</sub> at 7.26 ppm): δ 10.24 (br s, 1H), 3.46 (q, *J* = 6.8 Hz, 2H), 3.41–3.36 (m, 6H), 2.33 (t, *J* = 7.2 Hz, 2H), 2.29–2.22 (m, 4H), 1.69–1.48 (m, 12H), 1.44–1.32 (m, 10H), 1.19 (t, *J* = 6.8 Hz, 3H); <sup>13</sup>C NMR (100 MHz, CDCl<sub>3</sub>, reference

peak CDCl<sub>3</sub> at 77.16 ppm):  $\delta$  179.3, 77.4, 77.3, 71.1, 70.8, 70.2, 66.2, 65.6, 65.5, 34.1, 29.81, 29.77, 29.4, 28.9, 28.6, 28.5, 28.2, 26.3, 26.2, 25.2, 24.6, 19.2, 19.1, 15.3; LRMS (ESI) m/z calcd for C<sub>24</sub>H<sub>41</sub>O<sub>4</sub> [M+H]<sup>+</sup>: 393.3, found: 393.3.

**Compound 20c:** Compound **20c** was synthesized from **19c** (91.7 mg, 0.24 mmol) with the procedure H and obtained as white solid. Yield: 57% (54.2 mg, 0.14 mmol); <sup>1</sup>H NMR (400 MHz, CDCl<sub>3</sub>, reference peak CDCl<sub>3</sub> at 7.26 ppm):  $\delta$  10.50 (br s, 1H), 3.52 (t, *J* = 6.8 Hz, 2H), 3.49–3.38 (m, 6H), 2.50 (t, *J* = 6.8 Hz, 2H), 2.34 (m, 2H), 2.23 (t, *J* = 6.6 Hz, 2H), 1.62–1.49 (m, 8H), 1.39–1.28 (m, 14H), 1.18 (t, *J* = 7.2 Hz, 3H); <sup>13</sup>C NMR (100 MHz, CDCl<sub>3</sub>, reference peak CDCl<sub>3</sub> at 77.16 ppm):  $\delta$  179.4, 77.7, 74.2, 71.3, 70.9, 68.6, 66.4, 66.2, 65.4, 34.0, 29.8, 29.7, 29.6, 29.54, 29.49, 28.6, 28.5, 28.1, 26.3, 26.2, 24.6, 20.7, 19.2, 15.3; LRMS (ESI) m/z calcd for C<sub>24</sub>H<sub>41</sub>O<sub>4</sub> [M+H]<sup>+</sup>: 393.3, found: 393.3.

**Compound 20d:** Compound **20d** was synthesized from **19d** (200 mg, 0.53 mmol) with the procedure H and obtained as white solid. Yield: 68% (141.2 mg, 0.36 mmol); <sup>1</sup>H NMR (300 MHz, CDCl<sub>3</sub>, reference peak CDCl<sub>3</sub> at 7.26 ppm):  $\delta$  8.37 (br s, 1H), 4.18 (s, 2H), 3.51–3.44 (m, 4H), 3.40 (t, *J* = 6.75 Hz, 2H), 2.33 (t, *J* = 7.5 Hz, 2H), 2.28 (t, *J* = 6.9 Hz, 2H), 1.69–1.49 (m, 8H), 1.47–1.28 (m, 16H), 1.20 (t, *J* = 7.05 Hz, 3H); <sup>13</sup>C NMR (75 MHz, CDCl<sub>3</sub>, reference peak CDCl<sub>3</sub> at 77.23 ppm):  $\delta$  179.2, 81.0, 72.4, 71.2, 71.0, 70.6, 66.3, 64.9, 58.8, 34.1, 30.0, 29.71, 29.69, 29.6, 28.7, 28.6, 28.1, 26.4, 26.3, 24.7, 19.4, 15.4; LRMS (ESI) m/z calcd for C<sub>24</sub>H<sub>41</sub>O<sub>4</sub> [M+H]<sup>+</sup>: 393.3, found: 393.3.

**Compound 20e:** Compound **20e** was synthesized from **19e** (56.9 mg, 0.15 mmol) with the procedure H and obtained as white solid. Yield: 83% (49.2 mg, 0.13 mmol); <sup>1</sup>H NMR (400 MHz, CDCl<sub>3</sub>, reference peak CDCl<sub>3</sub> at 7.26 ppm):  $\delta$  10.35 (br s, 1H), 3.42–3.34 (m, 8H), 2.33–2.31 (m, 2H), 2.23 (t, *J* = 6.6 Hz, 4H), 1.62–1.60 (m, 6H), 1.58–1.48 (m, 8H), 1.39–1.33 (m, 8H), 0.90 (t, *J* = 7.4 Hz, 3H); <sup>13</sup>C NMR (100 MHz, CDCl<sub>3</sub>, reference peak CDCl<sub>3</sub> at 77.23 ppm):  $\delta$  179.6, 77.7, 77.4, 72.7, 70.9, 70.8, 70.7, 65.6, 65.5, 34.2, 29.7, 28.8, 28.7, 28.6, 28.4, 28.3, 26.6, 25.9, 24.7, 23.1, 19.33, 19.31, 10.8; LRMS (ESI) m/z calcd for C<sub>24</sub>H<sub>41</sub>O<sub>4</sub> [M+H]<sup>+</sup>: 393.3, found: 393.3.

**Compound 20f:** Compound **20f** was synthesized from **19f** (46.5 mg, 0.12 mmol) with the procedure H and obtained as white solid. Yield: 96% (46.1 mg, 0.12 mmol); <sup>1</sup>H NMR (400 MHz, CDCl<sub>3</sub>, reference peak CDCl<sub>3</sub> at 7.26 ppm):  $\delta$  10.32 (br s, 1H), 3.41–3.34 (m, 8H), 2.33 (t, *J* = 7.4 Hz, 2H), 2.28–2.22 (m, 4H), 1.68–1.48 (m, 14H), 1.44–1.33 (m, 8H), 0.90 (t, *J* = 7.4 Hz, 3H); <sup>13</sup>C NMR (100 MHz, CDCl<sub>3</sub>, reference peak CDCl<sub>3</sub> at 77.16 ppm):  $\delta$  179.4, 77.4, 77.3, 72.7, 71.0, 70.9, 70.2, 65.6, 65.5, 34.0, 29.8, 28.9, 28.6, 28.5, 28.2, 26.2, 25.2, 24.6, 23.0, 19.2, 19.1, 10.7; LRMS (ESI) m/z calcd for C<sub>24</sub>H<sub>41</sub>O<sub>4</sub> [M+H]<sup>+</sup>: 393.3, found: 393.3.

**Compound 20g:** Compound **20g** was synthesized from **19g** (70 mg, 0.18 mmol) with the procedure H and obtained as white solid. Yield: 64% (46.3 mg, 0.12 mmol); <sup>1</sup>H NMR (300 MHz, CDCl<sub>3</sub>, reference peak CDCl<sub>3</sub> at 7.26 ppm):  $\delta$  10.56 (br s, 1H), 3.52 (t, *J* = 7.05 Hz, 2H), 3.44–3.33 (m, 6H), 2.51 (t, *J* = 7.05 Hz, 2H), 2.33 (t, *J* = 7.2 Hz, 2H), 2.23 (t, *J* = 6.75 Hz, 2H), 1.65–1.47 (m, 10H), 1.45–1.30 (m, 12H), 0.90 (t, *J* = 7.35 Hz, 3H); <sup>13</sup>C NMR (75 MHz, CDCl<sub>3</sub>, reference peak CDCl<sub>3</sub> at 77.23 ppm):  $\delta$  179.7, 77.8, 74.2, 72.7, 71.3, 71.1, 68.7, 66.4, 65.5, 34.2, 29.9, 29.7, 29.60, 29.57, 28.7, 28.6, 28.2, 26.3, 26.2, 24.7, 23.1, 20.8, 19.3, 10.8; LRMS (ESI) m/z calcd for C<sub>24</sub>H<sub>41</sub>O<sub>4</sub> [M+H]<sup>+</sup>: 393.3, found: 393.3.

**Compound 20h:** Compound **20h** was synthesized from **19h** (136 mg, 0.36 mmol) with the procedure H and obtained as white solid. Yield: 61% (86.2 mg, 0.22 mmol); <sup>1</sup>H NMR (400 MHz, CDCl<sub>3</sub>, reference peak CDCl<sub>3</sub> at 7.26 ppm):  $\delta$  10.39 (br s, 1H), 4.18 (s, 2H), 3.49 (t, *J* = 6.6 Hz, 2H), 3.42–3.35 (m, 4H), 2.36 (t, *J* = 6.8 Hz, 2H), 2.28 (t, *J* = 6.8 Hz, 2H), 1.66–1.51 (m, 10H), 1.46–1.30 (m, 14H), 0.91 (t, *J* = 7.6 Hz, 3H); <sup>13</sup>C NMR (100 MHz, CDCl<sub>3</sub>, reference peak CDCl<sub>3</sub> at 77.16 ppm):  $\delta$  179.5, 80.9, 72.7, 72.3, 71.1, 71.0, 70.5, 64.8, 58.7, 34.0, 29.8, 29.6, 29.54, 29.49, 28.6, 28.5, 28.0, 26.3, 26.2, 24.6, 23.0, 19.3, 10.7; LRMS (ESI) m/z calcd for C<sub>24</sub>H<sub>41</sub>O<sub>4</sub> [M+H]<sup>+</sup>: 393.3, found: 393.3.



## I. General synthetic procedure and characterization for compounds **22a–22h**

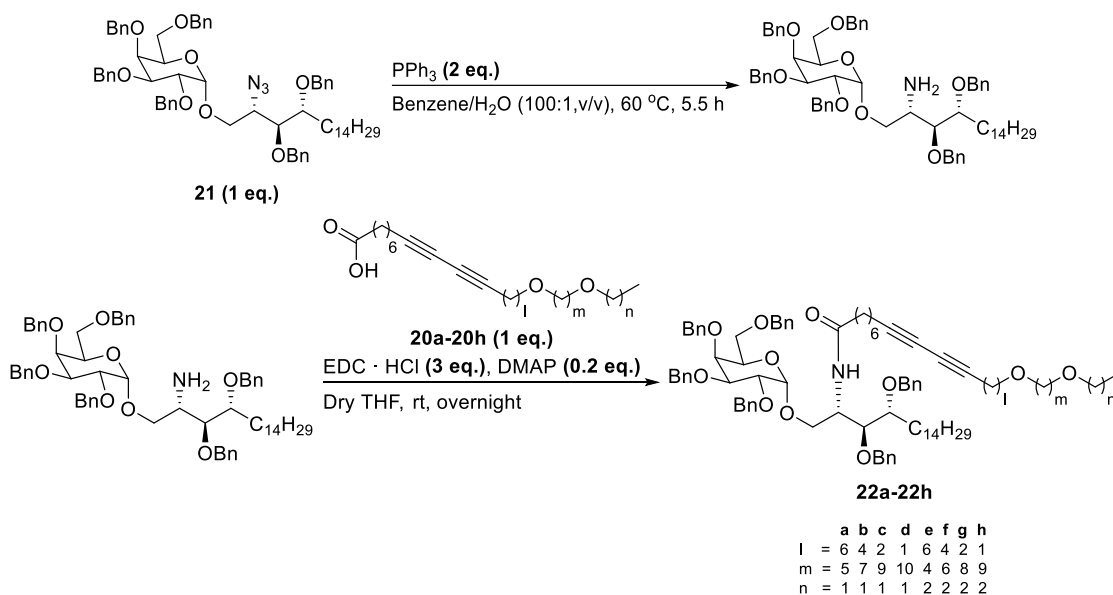

To a solution of **21**<sup>2)</sup> (1 equiv.) at r.t. in benzene (2 mL) and H<sub>2</sub>O (20 μL) was added PPh<sub>3</sub> (2 equiv.), then stirred at 60 °C for 5.5 h. After reaction completion checked by TLC, the reaction mixture was concentrated *in vacuo*. The residue was evaporated with dry toluene three times to remove H<sub>2</sub>O. **20a–20h** (1 equiv.), 1-(3-dimethylaminopropyl)-3-ethylcarbodiimide hydrochloride (EDC·HCl, 3 equiv.) and 4-dimethylaminopyridine (DMAP) (0.2 equiv.) were added to the corresponding mixture and dissolved in dry THF (2 mL) under Ar(g), then stirred at r.t. for overnight. After reaction completion checked by TLC, the reaction mixture was concentrated *in vacuo*. The residue was purified by silica-gel flash column chromatography (16.67% EA in hexane gradient to 25%) to obtain the desired compounds **22a–22h**.

**Compound 22a:** Compound **22a** was synthesized from **21** (78.4 mg, 0.075 mmol) and **20a** (29.4 mg, 0.075 mmol) with the procedure I and obtained as colorless gel. Two step yield: 75% (78.8 mg, 0.056 mmol); [ $\alpha$ ]<sub>D</sub><sup>25</sup> +16.0 (*c* = 1.00, CHCl<sub>3</sub>); <sup>1</sup>H NMR (400 MHz, CDCl<sub>3</sub>, reference peak TMS at 0.00 ppm):  $\delta$  7.38–7.21 (m, 30H), 6.12 (d, *J* = 8.8 Hz, 1H), 4.92 (d, *J* = 11.6 Hz, 1H), 4.85 (d, *J* = 3.6 Hz, 1H), 4.81–4.73 (m, 4H), 4.65–4.35 (m, 7H), 4.20–4.13 (m, 1H), 4.06–3.99 (m, 2H), 3.94–3.84 (m, 4H), 3.74 (dd, *J* = 10.8, 3.2 Hz, 1H), 3.52–3.36 (m, 11H), 2.23–2.17 (m, 4H), 1.95–1.86 (m, 2H), 1.68–1.16 (m, 51H), 0.88 (t, *J* = 6.6 Hz, 3H); <sup>13</sup>C NMR (100 MHz, CDCl<sub>3</sub>, reference peak CDCl<sub>3</sub> at 77.16 ppm):  $\delta$  172.7, 138.8, 138.7, 138.57, 138.56, 137.7, 128.52, 128.48, 128.46, 128.44, 128.42, 128.39, 128.3, 128.01, 127.97, 127.9, 127.81, 127.76, 127.66, 127.65, 127.6, 127.5, 99.7, 80.2, 79.0, 78.8, 77.6, 77.39, 77.36, 76.8, 74.9, 74.8, 73.7, 73.6, 73.0, 71.8, 70.9, 70.7, 70.1, 69.5, 69.4, 66.2, 65.6, 65.4, 50.5, 36.6, 32.0, 30.0, 29.9, 29.84, 29.78, 29.75, 29.71, 29.5, 28.9, 28.8, 28.7, 28.4, 28.3, 26.2, 25.8, 25.5, 23.0, 22.8, 19.2, 15.4, 14.2; LRMS (ESI) *m/z* calcd for C<sub>90</sub>H<sub>123</sub>NNaO<sub>11</sub> [M+Na]<sup>+</sup>: 1416.9, found: 1417.2.

**Compound 22b:** Compound **22b** was synthesized from **21** (75.6 mg, 0.072 mmol) and **20b** (28.4 mg, 0.072 mmol) with the procedure I and obtained as colorless gel. Two step yield: 64% (64.4 mg, 0.046 mmol); [ $\alpha$ ]<sub>D</sub><sup>25</sup> +16.6 (*c* = 1.00, CHCl<sub>3</sub>); <sup>1</sup>H NMR (400 MHz, CDCl<sub>3</sub>, reference peak TMS at 0.00 ppm):  $\delta$  7.38–7.21 (m, 30H), 6.12 (d, *J* = 8.4 Hz, 1H), 4.92 (d, *J* = 11.6 Hz, 1H), 4.85 (d, *J* = 3.6 Hz, 1H), 4.81–4.72 (m, 4H), 4.65–4.35 (m, 7H), 4.20–4.13 (m, 1H), 4.06–3.99 (m, 2H), 3.94–3.84 (m, 4H), 3.74 (dd, *J* = 11.0, 3.4 Hz, 1H), 3.52–3.35 (m, 11H), 2.25 (t, *J* = 6.8 Hz, 2H), 2.18 (t, *J* = 6.8 Hz, 2H), 1.95–1.86 (m, 2H), 1.68–1.18 (m, 51H), 0.88 (t, *J* = 6.8 Hz, 3H); <sup>13</sup>C NMR (100 MHz, CDCl<sub>3</sub>, reference peak CDCl<sub>3</sub> at 77.16 ppm):  $\delta$  172.7, 138.79, 138.78, 138.7, 138.58, 138.56, 137.7, 128.53, 128.49, 128.47, 128.45, 128.43, 128.39, 128.36, 128.01, 127.98, 127.9, 127.81, 127.76, 127.67, 127.65, 127.6, 127.5, 99.7, 80.2, 79.0, 78.8, 77.4, 76.8, 74.9, 74.8, 73.7, 73.6, 73.0, 71.8, 71.1, 70.8, 70.2, 70.1, 69.5, 69.4, 66.2, 65.7, 65.6, 50.5, 36.6, 32.0, 30.0, 29.93, 29.87, 29.84, 29.80, 29.49, 29.46, 29.0, 28.9, 28.7, 28.3, 26.28, 26.25, 26.2, 25.5, 25.3, 22.8, 19.2, 19.1, 15.4, 14.3; LRMS (ESI) *m/z* calcd for C<sub>90</sub>H<sub>123</sub>NNaO<sub>11</sub> [M+Na]<sup>+</sup>: 1416.9, found: 1417.3.

**Compound 22c:** Compound **22c** was synthesized from **21** (76.7 mg, 0.073 mmol) and **20c** (28.8 mg, 0.073 mmol) with the procedure I and obtained as colorless gel. Two step yield: 67% (68.6 mg, 0.049 mmol);  $[\alpha]_{\text{D}}^{25} +17.5$  ( $c = 1.00$ ,  $\text{CHCl}_3$ );  $^1\text{H NMR}$  (400 MHz,  $\text{CDCl}_3$ , reference peak TMS at 0.00 ppm):  $\delta$  7.39–7.21 (m, 30H), 6.13 (d,  $J = 8.8$  Hz, 1H), 4.92 (d,  $J = 11.6$  Hz, 1H), 4.85 (d,  $J = 3.6$  Hz, 1H), 4.81–4.72 (m, 4H), 4.65–4.35 (m, 7H), 4.20–4.13 (m, 1H), 4.06–3.99 (m, 2H), 3.94–3.84 (m, 4H), 3.74 (dd,  $J = 11.0, 3.4$  Hz, 1H), 3.52–3.38 (m, 11H), 2.49 (t,  $J = 7.0$  Hz, 2H), 2.18 (t,  $J = 7.0$  Hz, 2H), 1.93–1.88 (m, 2H), 1.68–1.16 (m, 51H), 0.88 (t,  $J = 6.8$  Hz, 3H);  $^{13}\text{C NMR}$  (100 MHz,  $\text{CDCl}_3$ , reference peak  $\text{CDCl}_3$  at 77.16 ppm):  $\delta$  172.7, 138.78, 138.77, 138.7, 138.6, 138.5, 137.7, 128.53, 128.49, 128.47, 128.44, 128.42, 128.39, 128.3, 128.01, 127.97, 127.9, 127.81, 127.76, 127.7, 127.65, 127.63, 127.5, 99.7, 80.2, 79.0, 78.8, 77.8, 77.4, 76.8, 74.9, 74.8, 74.1, 73.69, 73.68, 73.6, 73.0, 71.8, 71.3, 70.9, 70.1, 69.5, 69.4, 68.6, 66.4, 66.1, 65.4, 50.5, 36.6, 32.0, 30.0, 29.9, 29.84, 29.81, 29.79, 29.7, 29.6, 29.55, 29.50, 29.49, 28.9, 28.6, 28.2, 26.3, 26.2, 25.5, 22.8, 20.7, 19.2, 15.4, 14.2; LRMS (ESI)  $m/z$  calcd for  $\text{C}_{90}\text{H}_{123}\text{NNaO}_{11}$   $[\text{M}+\text{Na}]^+$ : 1416.9, found: 1417.3.

**Compound 22d:** Compound **22d** was synthesized from **21** (100 mg, 0.096 mmol) and **20d** (37.5 mg, 0.096 mmol) with the procedure I and obtained as colorless gel. Two step yield: 75% (99.8 mg, 0.072 mmol);  $[\alpha]_{\text{D}}^{25} +14.9$  ( $c = 1.00$ ,  $\text{CHCl}_3$ );  $^1\text{H NMR}$  (400 MHz,  $\text{CDCl}_3$ , reference peak TMS at 0.00 ppm):  $\delta$  7.38–7.21 (m, 30H), 6.12 (d,  $J = 8.8$  Hz, 1H), 4.92 (d,  $J = 11.6$  Hz, 1H), 4.84 (d,  $J = 3.6$  Hz, 1H), 4.82–4.72 (m, 4H), 4.65–4.35 (m, 7H), 4.19–4.13 (m, 3H), 4.06–4.00 (m, 2H), 3.94–3.84 (m, 4H), 3.74 (dd,  $J = 11.0, 3.4$  Hz, 1H), 3.52–3.38 (m, 9H), 2.21 (t,  $J = 7.0$  Hz, 2H), 1.95–1.86 (m, 2H), 1.68–1.18 (m, 53H), 0.88 (t,  $J = 7.0$  Hz, 3H);  $^{13}\text{C NMR}$  (100 MHz,  $\text{CDCl}_3$ , reference peak  $\text{CDCl}_3$  at 77.23 ppm):  $\delta$  172.8, 138.88, 138.86, 138.8, 138.7, 137.8, 128.64, 128.60, 128.57, 128.55, 128.53, 128.50, 128.46, 128.11, 128.07, 128.0, 127.91, 127.87, 127.8, 127.7, 127.6, 99.8, 81.0, 80.3, 79.1, 78.9, 77.4, 76.9, 75.0, 74.9, 73.8, 73.7, 73.1, 72.4, 71.9, 71.2, 71.0, 70.6, 70.2, 69.7, 69.5, 66.3, 64.9, 58.8, 50.6, 36.6, 32.1, 30.1, 30.0, 29.94, 29.89, 29.73, 29.71, 29.69, 29.64, 29.59, 28.9, 28.8, 28.2, 26.4, 26.3, 25.6, 22.9, 19.4, 15.5, 14.3; LRMS (ESI)  $m/z$  calcd for  $\text{C}_{90}\text{H}_{123}\text{NNaO}_{11}$   $[\text{M}+\text{Na}]^+$ : 1416.9, found: 1417.1.

**Compound 22e:** Compound **22e** was synthesized from **21** (81 mg, 0.077 mmol) and **20e** (30.4 mg, 0.077 mmol) with the procedure I and obtained as colorless gel. Two step yield: 69% (74.4 mg, 0.053 mmol);  $[\alpha]_{\text{D}}^{25} +15.0$  ( $c = 1.00$ ,  $\text{CHCl}_3$ );  $^1\text{H NMR}$  (400 MHz,  $\text{CDCl}_3$ , reference peak TMS at 0.00 ppm):  $\delta$  7.38–7.21 (m, 30H), 6.09 (d,  $J = 8.4$  Hz, 1H), 4.92 (d,  $J = 11.6$  Hz, 1H), 4.84 (d,  $J = 3.6$  Hz, 1H), 4.82–4.72 (m, 4H), 4.65–4.35 (m, 7H), 4.19–4.13 (m, 1H), 4.06–3.99 (m, 2H), 3.94–3.84 (m, 4H), 3.74 (dd,  $J = 11.0, 3.4$  Hz, 1H), 3.52–3.34 (m, 11H), 2.24–2.17 (m, 4H), 1.95–1.85 (m, 2H), 1.68–1.18 (m, 48H), 0.93–0.86 (m, 6H);  $^{13}\text{C NMR}$  (100 MHz,  $\text{CDCl}_3$ , reference peak  $\text{CDCl}_3$  at 77.23 ppm):  $\delta$  172.8, 138.89, 138.88, 138.8, 138.7, 137.8, 128.63, 128.59, 128.56, 128.54, 128.52, 128.49, 128.4, 128.11, 128.07, 128.0, 127.90, 127.86, 127.8, 127.7, 127.6, 99.8, 80.3, 79.1, 78.9, 77.7, 77.4, 76.9, 75.0, 74.9, 73.8, 73.7, 73.1, 72.8, 71.9, 71.0, 70.9, 70.8, 70.2, 69.7, 69.5, 65.6, 65.5, 50.6, 36.7, 32.1, 30.1, 30.0, 29.94, 29.89, 29.8, 29.6, 29.0, 28.9, 28.8, 28.5, 28.4, 26.7, 26.3, 25.9, 25.6, 23.2, 22.9, 19.4, 14.3, 10.8; LRMS (ESI)  $m/z$  calcd for  $\text{C}_{90}\text{H}_{123}\text{NNaO}_{11}$   $[\text{M}+\text{Na}]^+$ : 1416.9, found: 1417.2.

**Compound 22f:** Compound **22f** was synthesized from **21** (92.2 mg, 0.088 mmol) and **20f** (34.6 mg, 0.088 mmol) with the procedure I and obtained as colorless gel. Two step yield: 60% (74.1 mg, 0.053 mmol);  $[\alpha]_{\text{D}}^{25} +16.6$  ( $c = 1.00$ ,  $\text{CHCl}_3$ );  $^1\text{H NMR}$  (400 MHz,  $\text{CDCl}_3$ , reference peak TMS at 0.00 ppm):  $\delta$  7.38–7.21 (m, 30H), 6.09 (d,  $J = 8.4$  Hz, 1H), 4.92 (d,  $J = 12.0$  Hz, 1H), 4.84 (d,  $J = 3.6$  Hz, 1H), 4.82–4.72 (m, 4H), 4.65–4.35 (m, 7H), 4.19–4.13 (m, 1H), 4.06–3.99 (m, 2H), 3.94–3.84 (m, 4H), 3.74 (dd,  $J = 11.0, 3.8$  Hz, 1H), 3.52–3.34 (m, 11H), 2.26 (t,  $J = 7.0$  Hz, 2H), 2.18 (t,  $J = 7.0$  Hz, 2H), 1.95–1.85 (m, 2H), 1.69–1.16 (m, 48H), 0.93–0.86 (m, 6H);  $^{13}\text{C NMR}$  (100 MHz,  $\text{CDCl}_3$ , reference peak  $\text{CDCl}_3$  at 77.23 ppm):  $\delta$  172.8, 138.89, 138.88, 138.8, 138.7, 137.8, 128.63, 128.59, 128.56, 128.54, 128.52, 128.49, 128.4, 128.11, 128.07, 128.0, 127.90, 127.86, 127.8, 127.75, 127.73, 127.6, 99.8, 80.3, 79.1, 78.9, 77.5, 76.9, 75.0, 74.9, 73.8, 73.7, 73.1, 72.8, 71.9, 71.1, 71.0, 70.3, 70.2, 69.7, 69.5, 65.7, 65.6, 50.6, 36.7, 32.1, 30.1, 30.0, 29.94, 29.89, 29.6, 29.1, 29.0, 28.8, 28.4, 26.7, 26.3, 25.6, 25.3, 23.2, 22.9, 19.3, 19.2, 14.3, 10.8; LRMS (ESI)  $m/z$  calcd for  $\text{C}_{90}\text{H}_{123}\text{NNaO}_{11}$   $[\text{M}+\text{Na}]^+$ : 1416.9, found: 1417.2.

**Compound 22g:** Compound **22g** was synthesized from **21** (104 mg, 0.099 mmol) and **20g** (39 mg, 0.099 mmol) with the procedure I and obtained as colorless gel. Two step yield: 68% (94.3 mg, 0.068 mmol);  $[\alpha]_{\text{D}}^{25} +14.8$  ( $c = 1.00$ ,  $\text{CHCl}_3$ );  $^1\text{H NMR}$  (400 MHz,  $\text{CDCl}_3$ , reference peak TMS at 0.00 ppm):  $\delta$  7.38–7.21 (m, 30H), 6.09 (d,  $J = 8.0$  Hz, 1H), 4.92 (d,  $J = 11.6$  Hz, 1H), 4.84 (d,  $J = 3.6$  Hz, 1H), 4.82–4.72 (m, 4H), 4.65–4.35 (m, 7H), 4.19–4.13 (m, 1H), 4.06–4.00 (m, 2H), 3.94–3.84 (m, 4H), 3.74 (dd,  $J = 11.0, 3.4$  Hz, 1H), 3.52–3.34 (m, 11H), 2.50 (t,  $J = 7.2$  Hz, 2H), 2.18 (t,  $J = 6.8$  Hz, 2H), 1.95–1.85 (m, 2H), 1.66–1.16 (m, 48H), 0.93–0.86 (m, 6H);  $^{13}\text{C NMR}$  (100

MHz, CDCl<sub>3</sub>, reference peak CDCl<sub>3</sub> at 77.23 ppm):  $\delta$  172.8, 138.88, 138.87, 138.8, 138.7, 137.8, 128.63, 128.58, 128.56, 128.54, 128.52, 128.49, 128.4, 128.10, 128.07, 128.0, 127.90, 127.86, 127.8, 127.7, 127.6, 99.8, 80.3, 79.1, 78.9, 77.9, 76.9, 75.0, 74.9, 74.2, 73.8, 73.7, 73.1, 72.8, 71.9, 71.4, 71.1, 70.2, 69.7, 69.5, 68.7, 66.5, 65.5, 50.6, 36.7, 32.1, 30.1, 30.03, 29.97, 29.94, 29.88, 29.8, 29.63, 29.60, 29.58, 29.0, 28.8, 28.3, 26.34, 26.28, 26.2, 25.6, 23.2, 22.9, 20.8, 19.3, 14.3, 10.8; LRMS (ESI) *m/z* calcd for C<sub>90</sub>H<sub>123</sub>NNaO<sub>11</sub> [M+Na]<sup>+</sup>: 1416.9, found: 1417.3.

**Compound 22h:** Compound **22h** was synthesized from **21** (104 mg, 0.099 mmol) and **20g** (39.0 mg, 0.099 mmol) with the procedure I and obtained as colorless gel. Two step yield: 50% (70 mg, 0.050 mmol); [ $\alpha$ ]<sub>D</sub><sup>25</sup> +15.4 (*c* = 1.00, CHCl<sub>3</sub>); <sup>1</sup>H NMR (400 MHz, CDCl<sub>3</sub>, reference peak TMS at 0.00 ppm):  $\delta$  7.38–7.21 (m, 30H), 6.13 (d, *J* = 8.4 Hz, 1H), 4.92 (d, *J* = 11.6 Hz, 1H), 4.85 (d, *J* = 3.6 Hz, 1H), 4.81–4.72 (m, 4H), 4.65–4.35 (m, 7H), 4.19–4.15 (m, 3H), 4.06–3.99 (m, 2H), 3.94–3.84 (m, 4H), 3.74 (dd, *J* = 11.0, 3.4 Hz, 1H), 3.52–3.34 (m, 9H), 2.21 (t, *J* = 7.0 Hz, 2H), 1.95–1.86 (m, 2H), 1.68–1.16 (m, 50H), 0.93–0.86 (m, 6H); <sup>13</sup>C NMR (100 MHz, CDCl<sub>3</sub>, reference peak CDCl<sub>3</sub> at 77.16 ppm):  $\delta$  172.7, 138.78, 138.77, 138.7, 138.565, 138.556, 137.7, 128.53, 128.49, 128.47, 128.45, 128.42, 128.39, 128.36, 128.01, 127.97, 127.9, 127.81, 127.76, 127.67, 127.65, 127.6, 127.5, 99.7, 80.9, 80.2, 79.0, 78.8, 76.8, 74.9, 74.8, 73.70, 73.68, 73.6, 73.0, 72.7, 72.3, 71.8, 71.1, 71.0, 70.5, 70.1, 69.6, 69.4, 64.8, 58.7, 50.5, 36.5, 32.0, 30.0, 29.93, 29.89, 29.84, 29.79, 29.6, 29.53, 29.49, 28.8, 28.7, 28.1, 26.3, 26.2, 25.5, 23.1, 22.8, 19.3, 14.2, 10.7; LRMS (ESI) *m/z* calcd for C<sub>90</sub>H<sub>123</sub>NNaO<sub>11</sub> [M+Na]<sup>+</sup>: 1416.9, found: 1417.2.

## J. General synthetic procedure and characterization for compounds 3–10

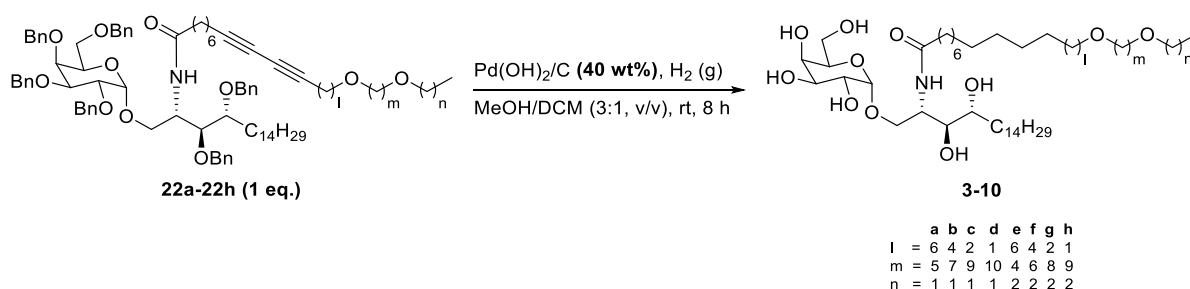

To a solution of **22a–22h** (1 equiv.) in MeOH (3 mL) and DCM (1 mL) at r.t. was added Pd(OH)<sub>2</sub>/C (40 wt%), then stirred at r.t. for 8 h under H<sub>2</sub>(g). After reaction completion checked by TLC, the reaction mixture was filtered through celite with MeOH/DCM (4:1, v/v). The resultant was concentrated *in vacuo* to obtain the desired compounds **3–10**.

**Compound 3:** Compound **3** was synthesized from **22a** (78.1 mg, 0.056 mmol) with the procedure J and obtained as white solid. Yield: 90% (43.3 mg, 0.050 mmol); [ $\alpha$ ]<sub>D</sub><sup>25</sup> +55.1 (*c* = 0.50, MeOH/CHCl<sub>3</sub> (1:1, v/v)); <sup>1</sup>H NMR (400 MHz, CD<sub>3</sub>OD/CDCl<sub>3</sub> (1:1, v/v), reference peak TMS at 0.00 ppm):  $\delta$  4.91 (d, *J* = 3.6 Hz, 1H), 4.20 (q, *J* = 4.4 Hz, 1H), 3.93 (d, *J* = 2.8 Hz, 1H), 3.89 (dd, *J* = 10.6, 4.6 Hz, 1H), 3.84–3.79 (m, 2H), 3.76–3.68 (m, 4H), 3.59–3.42 (m, 10H), 2.22 (t, *J* = 7.6 Hz, 2H), 1.66–1.54 (m, 8H), 1.45–1.27 (m, 52H), 1.21 (t, *J* = 6.8 Hz, 3H), 0.89 (t, *J* = 6.6 Hz, 3H); <sup>13</sup>C NMR (100 MHz, CD<sub>3</sub>OD/CDCl<sub>3</sub> (1:1, v/v), reference peak CD<sub>3</sub>OD at 49.00 ppm):  $\delta$  175.2, 100.4, 75.0, 72.5, 71.6, 71.5, 71.3, 71.2, 70.8, 70.4, 69.5, 67.8, 66.7, 62.3, 51.1, 36.9, 32.8, 32.5, 30.33, 30.31, 30.25, 30.22, 30.21, 30.16, 30.1, 30.0, 29.93, 29.92, 29.91, 26.6, 26.5, 26.4, 23.25, 23.19, 15.3, 14.3; HRMS (ESI) *m/z* calcd for C<sub>48</sub>H<sub>95</sub>NNaO<sub>11</sub> [M+Na]<sup>+</sup>: 884.6797, found: 884.6794.

**Compound 4:** Compound **4** was synthesized from **22b** (52.9 mg, 0.038 mmol) with the procedure J and obtained as white solid. Yield: quantitative (35 mg, 0.0401 mmol); [ $\alpha$ ]<sub>D</sub><sup>25</sup> +52.9 (*c* = 0.50, MeOH/CHCl<sub>3</sub> (1:1, v/v)); <sup>1</sup>H NMR (400 MHz, CD<sub>3</sub>OD/CDCl<sub>3</sub> (1:1, v/v), reference peak TMS at 0.00 ppm):  $\delta$  4.91 (d, *J* = 3.6 Hz, 1H), 4.21 (q, *J* = 4.4 Hz, 1H), 3.93 (d, *J* = 2.8 Hz, 1H), 3.89 (dd, *J* = 10.4, 4.8 Hz, 1H), 3.84–3.79 (m, 2H), 3.76–3.68 (m, 4H), 3.59–3.42 (m, 10H), 2.22 (t, *J* = 7.6 Hz, 2H), 1.67–1.56 (m, 8H), 1.38–1.27 (m, 52H), 1.21 (t, *J* = 7.0 Hz, 3H), 0.89 (t, *J* = 6.8 Hz, 3H); <sup>13</sup>C NMR (100 MHz, CD<sub>3</sub>OD/CDCl<sub>3</sub> (1:1, v/v), reference peak CD<sub>3</sub>OD at 49.00 ppm):  $\delta$

175.2, 100.4, 75.1, 72.4, 71.54, 71.45, 71.3, 70.8, 70.3, 69.5, 67.8, 66.7, 62.3, 51.1, 36.9, 32.8, 32.5, 30.32, 30.30, 30.25, 30.22, 30.19, 30.17, 30.11, 30.07, 30.04, 30.02, 29.99, 29.9, 29.8, 26.64, 26.59, 26.5, 26.4, 23.2, 15.3, 14.3; HRMS (ESI)  $m/z$  calcd for  $C_{48}H_{95}NNaO_{11}$   $[M+Na]^+$ : 884.6797, found: 884.6800.

**Compound 5:** Compound **5** was synthesized from **22c** (56 mg, 0.040 mmol) with the procedure J and obtained as white solid. Yield: 95% (33 mg, 0.038 mmol);  $[\alpha]_D^{25} +59.8$  ( $c = 0.50$ , MeOH/ $CHCl_3$  (1:1, v/v));  $^1H$  NMR (400 MHz,  $CD_3OD/CDCl_3$  (1:1, v/v), reference peak TMS at 0.00 ppm):  $\delta$  4.91 (d,  $J = 3.6$  Hz, 1H), 4.21 (q,  $J = 4.4$  Hz, 1H), 3.93 (d,  $J = 2.8$  Hz, 1H), 3.89 (dd,  $J = 10.6, 4.6$  Hz, 1H), 3.84–3.79 (m, 2H), 3.76–3.68 (m, 4H), 3.57–3.42 (m, 10H), 2.22 (t,  $J = 7.6$  Hz, 2H), 1.67–1.54 (m, 8H), 1.36–1.27 (m, 52H), 1.21 (t,  $J = 7.0$  Hz, 3H), 0.89 (t,  $J = 6.6$  Hz, 3H);  $^{13}C$  NMR (100 MHz,  $CD_3OD/CDCl_3$  (1:1, v/v), reference peak  $CD_3OD$  at 49.00 ppm):  $\delta$  175.1, 100.3, 75.1, 72.4, 71.53, 71.51, 71.3, 70.8, 70.3, 69.5, 67.8, 66.7, 62.3, 51.1, 36.9, 32.8, 32.5, 30.32, 30.29, 30.25, 30.21, 30.19, 30.16, 30.12, 30.09, 30.05, 30.03, 29.99, 29.91, 26.64, 26.59, 26.5, 26.4, 23.2, 15.3, 14.3; HRMS (ESI)  $m/z$  calcd for  $C_{48}H_{95}NNaO_{11}$   $[M+Na]^+$ : 884.6797, found: 884.6798.

**Compound 6:** Compound **6** was synthesized from **22d** (40 mg, 0.029 mmol) with the procedure J and obtained as white solid. Yield: 95% (23.5 mg, 0.027 mmol);  $[\alpha]_D^{25} +51.1$  ( $c = 0.50$ , MeOH/ $CHCl_3$  (1:1, v/v));  $^1H$  NMR (400 MHz,  $CD_3OD/CDCl_3$  (1:1, v/v), reference peak TMS at 0.00 ppm):  $\delta$  4.91 (d,  $J = 3.6$  Hz, 1H), 4.21 (q,  $J = 4.4$  Hz, 1H), 3.93 (d,  $J = 2.4$  Hz, 1H), 3.89 (dd,  $J = 10.6, 4.6$  Hz, 1H), 3.84–3.79 (m, 2H), 3.76–3.68 (m, 4H), 3.59–3.42 (m, 10H), 2.22 (t,  $J = 7.6$  Hz, 2H), 1.70–1.54 (m, 8H), 1.36–1.27 (m, 52H), 1.21 (t,  $J = 7.0$  Hz, 3H), 0.89 (t,  $J = 6.6$  Hz, 3H);  $^{13}C$  NMR (100 MHz,  $CD_3OD/CDCl_3$  (1:1, v/v), reference peak  $CD_3OD$  at 49.00 ppm):  $\delta$  175.2, 100.4, 75.1, 72.5, 71.59, 71.55, 71.4, 70.9, 70.4, 69.6, 67.8, 66.7, 62.3, 51.1, 36.9, 32.9, 32.5, 30.34, 30.31, 30.27, 30.21, 30.18, 30.15, 30.12, 30.10, 30.07, 30.05, 29.99, 29.98, 29.9, 26.7, 26.6, 26.5, 26.4, 23.2, 15.3, 14.3; HRMS (ESI)  $m/z$  calcd for  $C_{48}H_{95}NNaO_{11}$   $[M+Na]^+$ : 884.6797, found: 884.6796.

**Compound 7:** Compound **7** was synthesized from **22e** (40 mg, 0.029 mmol) with the procedure J and obtained as white solid. Yield: 88% (21.8 mg, 0.25 mmol);  $[\alpha]_D^{25} +60.0$  ( $c = 0.50$ , MeOH/ $CHCl_3$  (1:1, v/v));  $^1H$  NMR (300 MHz,  $CD_3OD/CDCl_3$  (1:1, v/v), reference peak TMS at 0.00 ppm):  $\delta$  4.91 (d,  $J = 3.6$  Hz, 1H), 4.24–4.17 (m, 1H), 3.93 (d,  $J = 2.4$  Hz, 1H), 3.88 (dd,  $J = 10.95, 4.65$  Hz, 1H), 3.84–3.79 (m, 2H), 3.76–3.67 (m, 4H), 3.61–3.53 (m, 2H), 3.47–3.38 (m, 8H), 2.22 (t,  $J = 7.65$  Hz, 2H), 1.69–1.54 (m, 10H), 1.44–1.27 (m, 50H), 0.96–0.87 (m, 6H);  $^{13}C$  NMR (75 MHz,  $CD_3OD/CDCl_3$  (1:1, v/v), reference peak  $CD_3OD$  at 49.00 ppm):  $\delta$  175.3, 100.4, 75.0, 73.2, 72.4, 71.6, 71.2, 70.9, 70.4, 69.6, 67.8, 62.3, 51.2, 37.0, 32.8, 32.5, 30.34, 30.28, 30.19, 30.15, 30.0, 29.9, 26.9, 26.8, 26.7, 26.53, 26.46, 23.3, 23.2, 14.3, 10.8; HRMS (ESI)  $m/z$  calcd for  $C_{48}H_{95}NNaO_{11}$   $[M+Na]^+$ : 884.6797, found: 884.6801.

**Compound 8:** Compound **8** was synthesized from **22f** (40 mg, 0.029 mmol) with the procedure J and obtained as white solid. Yield: 94% (23.2 mg, 0.27 mmol);  $[\alpha]_D^{25} +61.6$  ( $c = 0.50$ , MeOH/ $CHCl_3$  (1:1, v/v));  $^1H$  NMR (300 MHz,  $CD_3OD/CDCl_3$  (1:1, v/v), reference peak TMS at 0.00 ppm):  $\delta$  4.91 (d,  $J = 3.3$  Hz, 1H), 4.20 (q,  $J = 4.5$  Hz, 1H), 3.94–3.93 (m, 1H), 3.88 (dd,  $J = 10.95, 4.65$  Hz, 1H), 3.84–3.79 (m, 2H), 3.76–3.67 (m, 4H), 3.61–3.53 (m, 2H), 3.47–3.38 (m, 8H), 2.22 (t,  $J = 7.5$  Hz, 2H), 1.66–1.56 (m, 10H), 1.41–1.27 (m, 50H), 0.96–0.87 (m, 6H);  $^{13}C$  NMR (100 MHz,  $CD_3OD/CDCl_3$  (1:1, v/v), reference peak  $CD_3OD$  at 49.00 ppm):  $\delta$  175.2, 100.4, 75.1, 73.2, 72.5, 71.6, 71.40, 71.38, 70.9, 70.4, 69.6, 67.8, 62.3, 51.1, 37.0, 32.8, 32.5, 30.34, 30.32, 30.27, 30.24, 30.21, 30.19, 30.14, 30.09, 30.04, 30.02, 29.94, 29.92, 26.7, 26.50, 26.49, 26.4, 23.3, 23.2, 14.3, 10.7; HRMS (ESI)  $m/z$  calcd for  $C_{48}H_{95}NNaO_{11}$   $[M+Na]^+$ : 884.6797, found: 884.6796.

**Compound 9:** Compound **9** was synthesized from **22g** (40 mg, 0.027 mmol) with the procedure J and obtained as white solid. Yield: 64% (15.9 mg, 0.18 mmol);  $[\alpha]_D^{25} +57.9$  ( $c = 0.50$ , MeOH/ $CHCl_3$  (1:1, v/v));  $^1H$  NMR (300 MHz,  $CD_3OD/CDCl_3$  (1:1, v/v), reference peak TMS at 0.00 ppm):  $\delta$  4.91 (d,  $J = 3.6$  Hz, 1H), 4.21 (q,  $J = 4.5$  Hz, 1H), 3.93 (d,  $J = 2.4$  Hz, 1H), 3.89 (dd,  $J = 10.95, 4.65$  Hz, 1H), 3.84–3.78 (m, 2H), 3.76–3.67 (m, 4H), 3.60–3.52 (m, 2H), 3.46–3.38 (m, 8H), 2.22 (t,  $J = 7.5$  Hz, 2H), 1.66–1.54 (m, 10H), 1.34–1.27 (m, 50H), 0.95–0.87 (m, 6H);  $^{13}C$  NMR (75 MHz,  $CD_3OD/CDCl_3$  (1:1, v/v), reference peak  $CD_3OD$  at 49.00 ppm):  $\delta$  175.2, 100.4, 75.1, 73.2, 72.4, 71.6, 71.51, 71.49, 70.9, 70.4, 69.5, 67.8, 62.3, 51.1, 36.9, 32.8, 32.5, 30.33, 30.32, 30.27, 30.23, 30.21, 30.19, 30.14, 30.10, 30.05, 30.01, 29.95, 29.9, 26.7, 26.6, 26.5, 26.4, 23.3, 23.2, 14.3, 10.7; HRMS (ESI)  $m/z$  calcd for  $C_{48}H_{95}NNaO_{11}$   $[M+Na]^+$ : 884.6797, found: 884.6799.

**Compound 10:** Compound **10** was synthesized from **22h** (57.8 mg, 0.041 mmol) with the procedure J and obtained as white solid. Yield: 89% (31.7 mg, 0.37 mmol);  $[\alpha]_{\text{D}}^{25} +56.2$  ( $c = 0.50$ , MeOH/CHCl<sub>3</sub> (1:1, v/v)); <sup>1</sup>H NMR (400 MHz, CD<sub>3</sub>OD/CDCl<sub>3</sub> (1:1, v/v), reference peak TMS at 0.00 ppm):  $\delta$  4.91 (d,  $J = 3.6$  Hz, 1H), 4.21 (q,  $J = 4.4$  Hz, 1H), 3.93 (d,  $J = 2.8$  Hz, 1H), 3.89 (dd,  $J = 10.6, 4.6$  Hz, 1H), 3.84–3.79 (m, 2H), 3.76–3.68 (m, 4H), 3.59–3.53 (m, 2H), 3.46–3.38 (m, 8H), 2.22 (t,  $J = 7.6$  Hz, 2H), 1.67–1.54 (m, 10H), 1.36–1.27 (m, 50H), 0.95–0.87 (m, 6H); <sup>13</sup>C NMR (100 MHz, CD<sub>3</sub>OD/CDCl<sub>3</sub> (1:1, v/v), reference peak CD<sub>3</sub>OD at 49.00 ppm):  $\delta$  175.1, 100.3, 75.1, 73.1, 72.4, 71.53, 71.52, 71.48, 70.8, 70.3, 69.5, 67.8, 62.3, 51.0, 36.9, 32.8, 32.5, 30.32, 30.29, 30.24, 30.19, 30.16, 30.12, 30.09, 30.06, 30.03, 29.98, 29.91, 29.89, 26.65, 26.59, 26.5, 26.4, 23.3, 23.2, 14.3, 10.7; HRMS (ESI)  $m/z$  calcd for C<sub>48</sub>H<sub>95</sub>NNaO<sub>11</sub> [M+Na]<sup>+</sup>: 884.6797, found: 884.6796.

## 4. <sup>1</sup>H and <sup>13</sup>C NMR Spectra

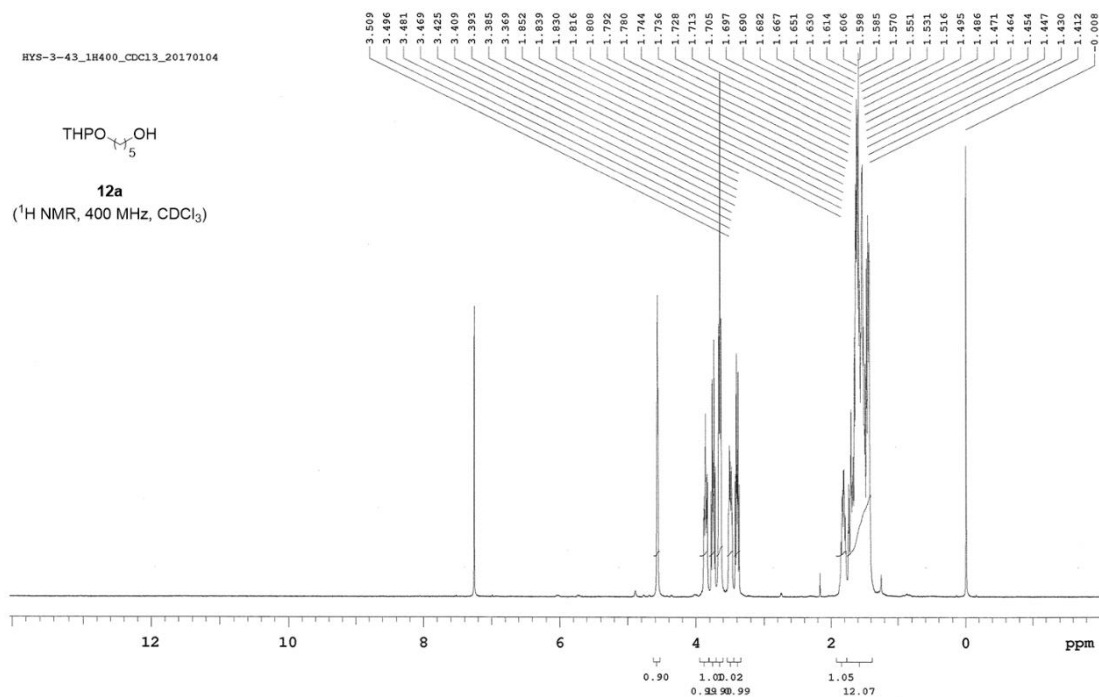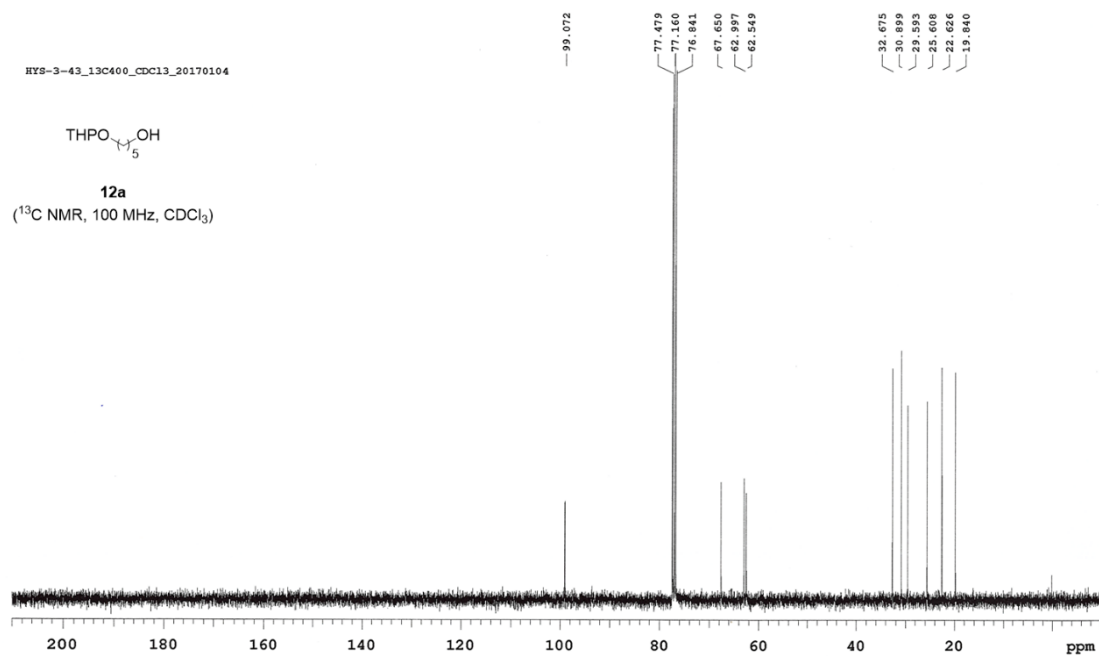

HYS-3-44\_1H400\_CDC13\_20170105

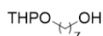

**12b**

(<sup>1</sup>H NMR, 400 MHz, CDCl<sub>3</sub>)

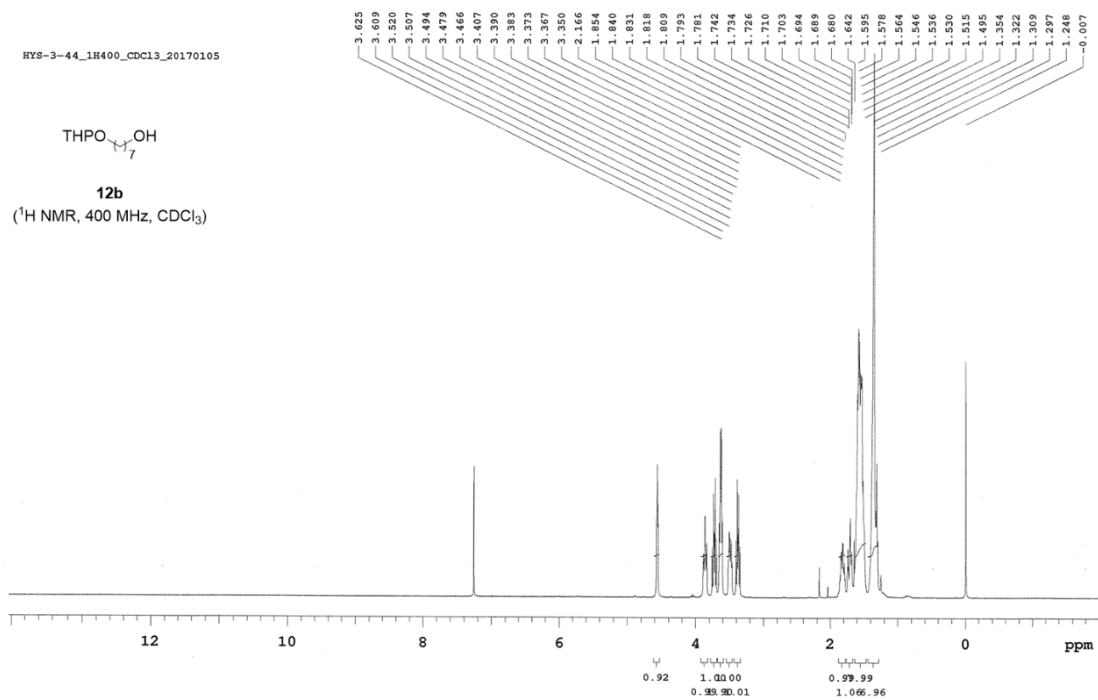

HYS-3-44\_13C400\_CDC13\_20170105

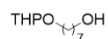

**12b**

(<sup>13</sup>C NMR, 100 MHz, CDCl<sub>3</sub>)

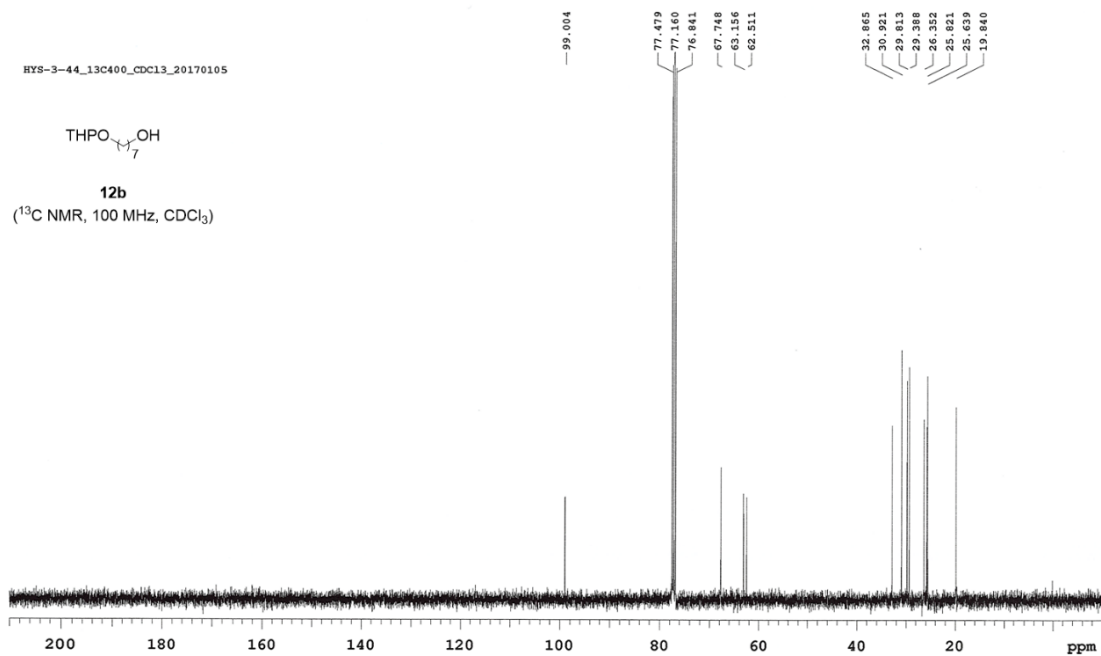



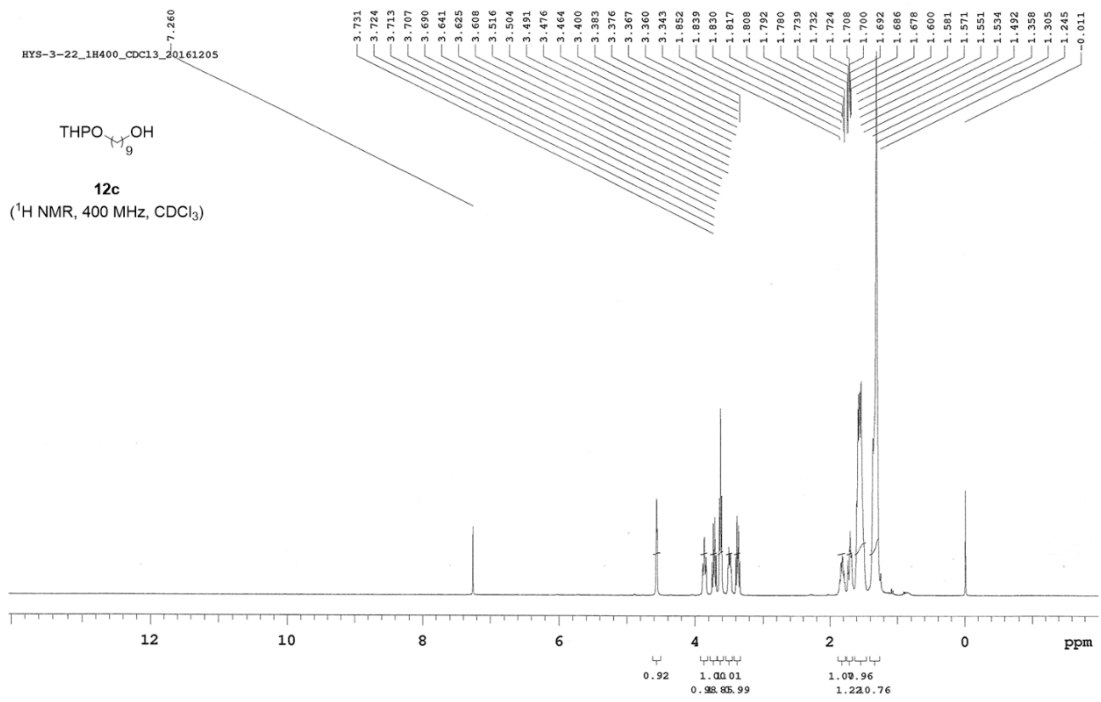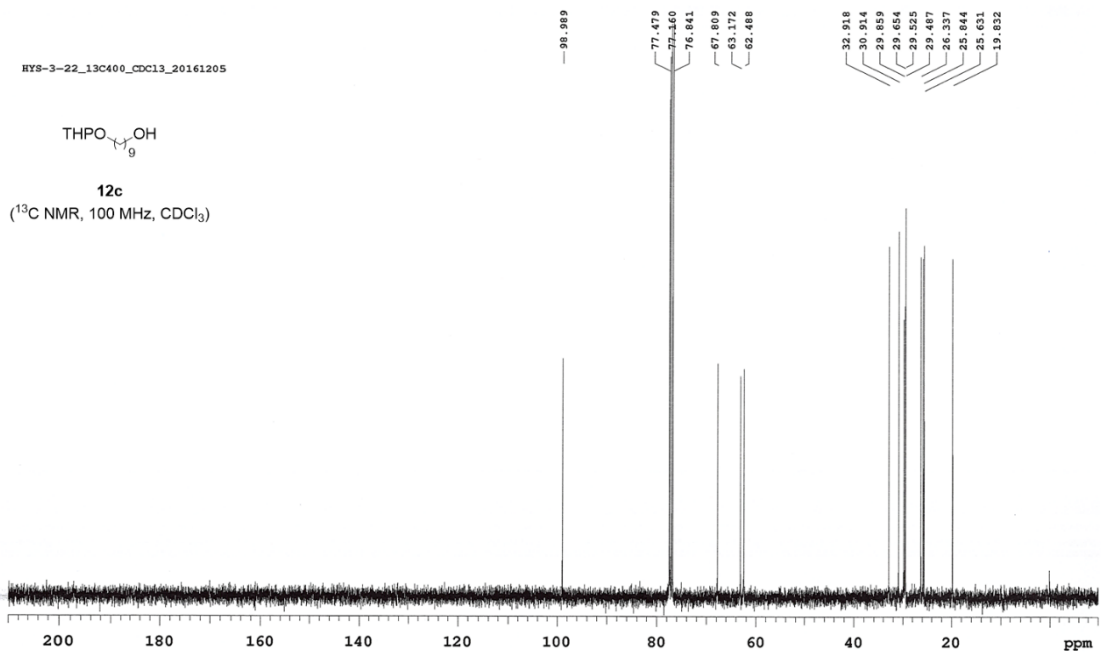

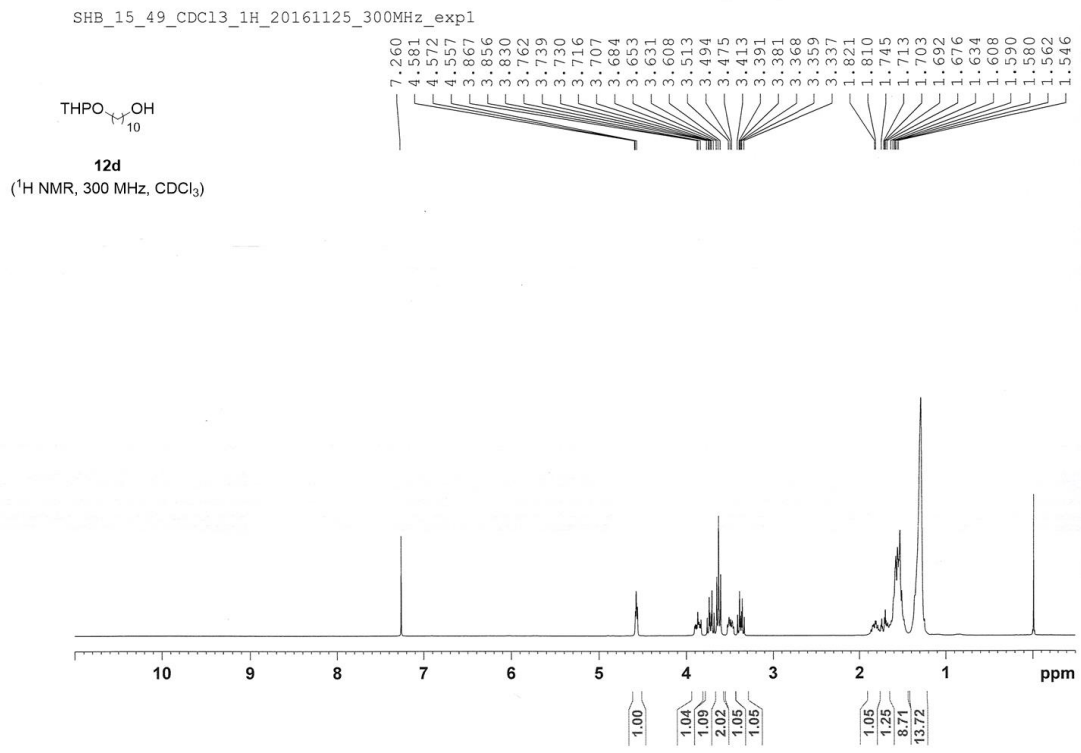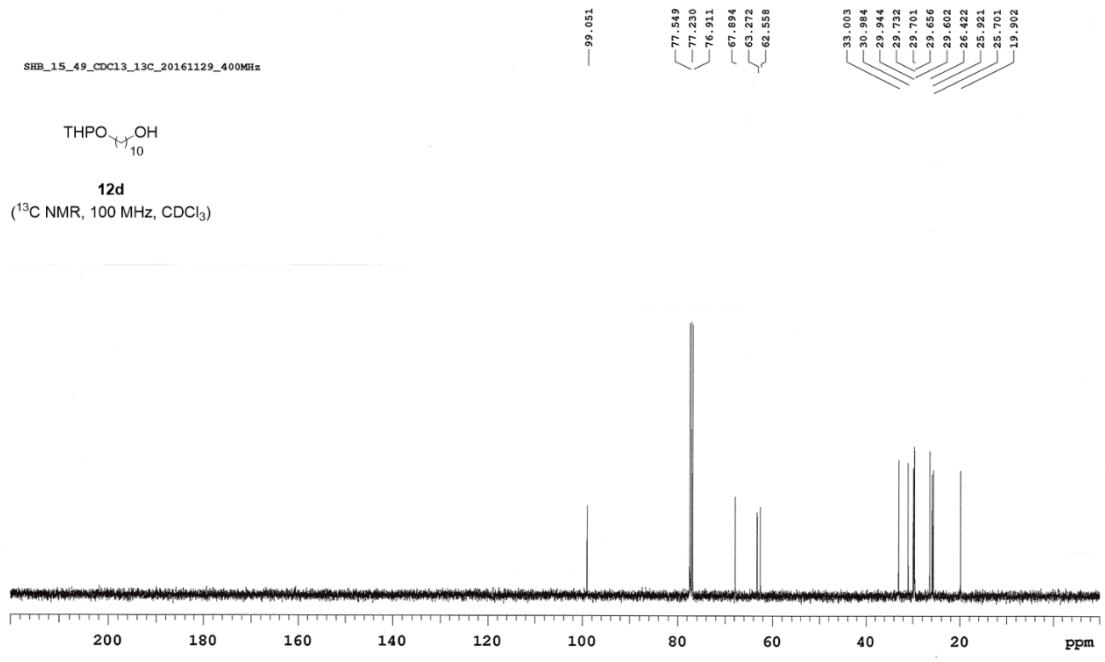

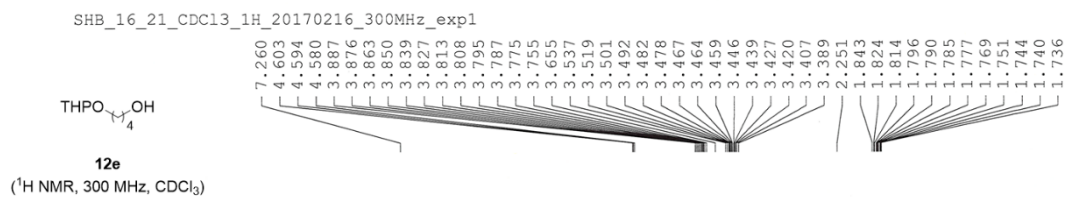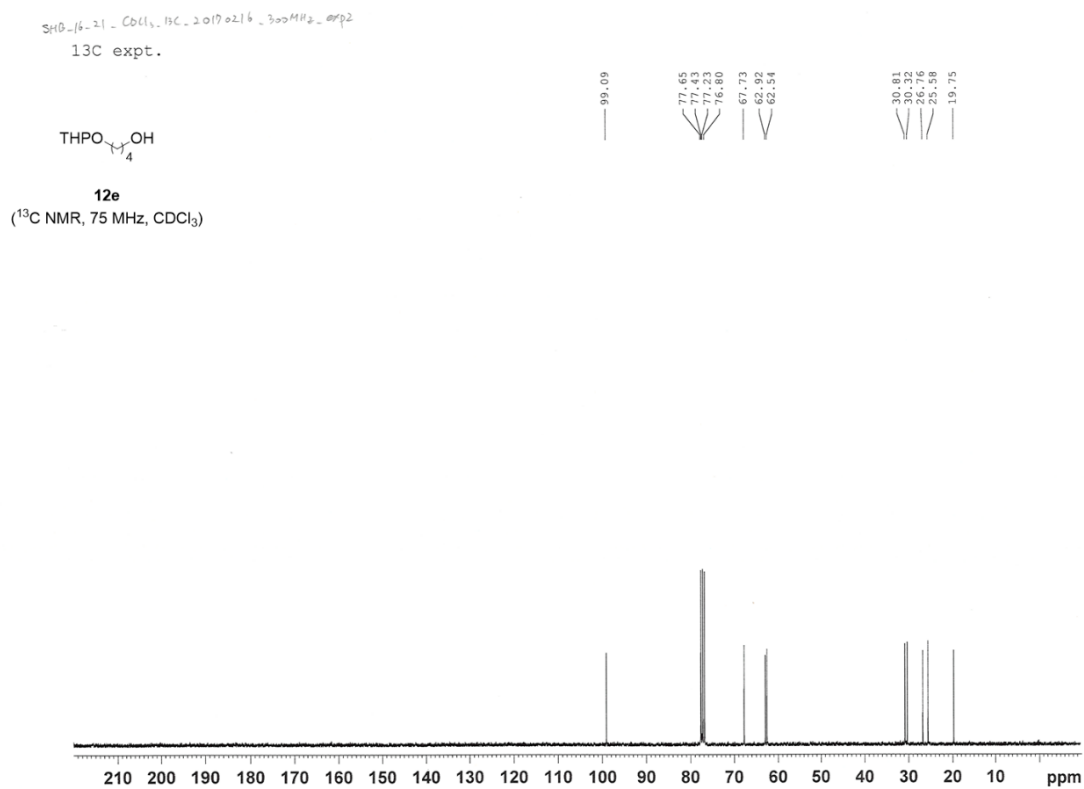

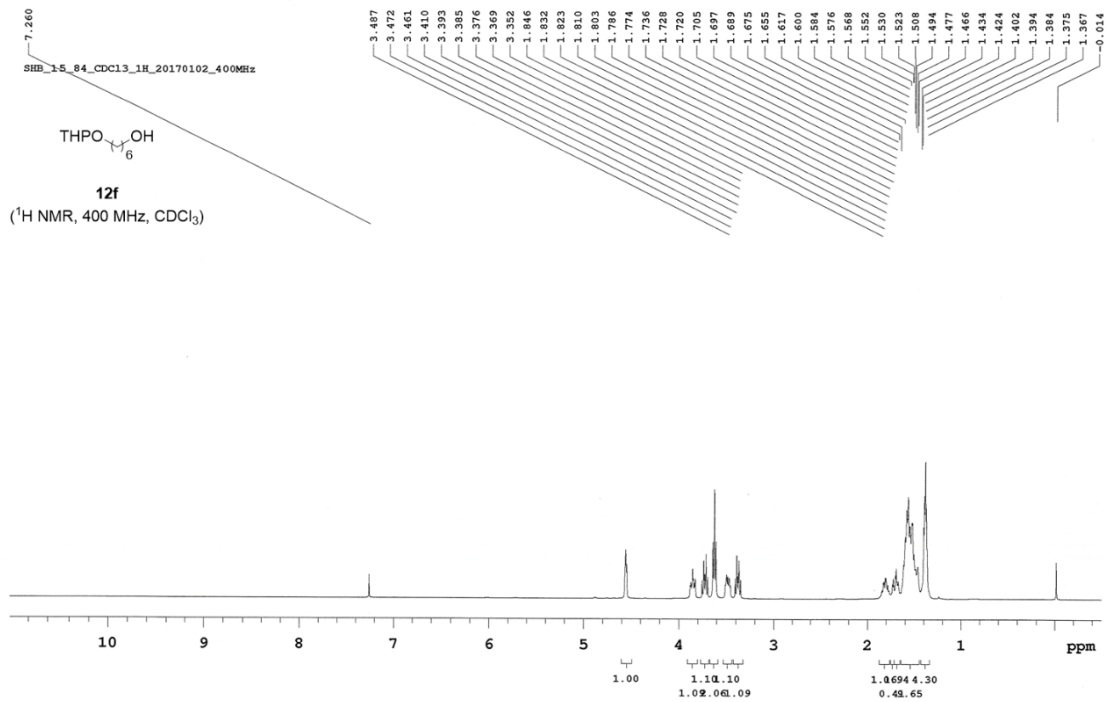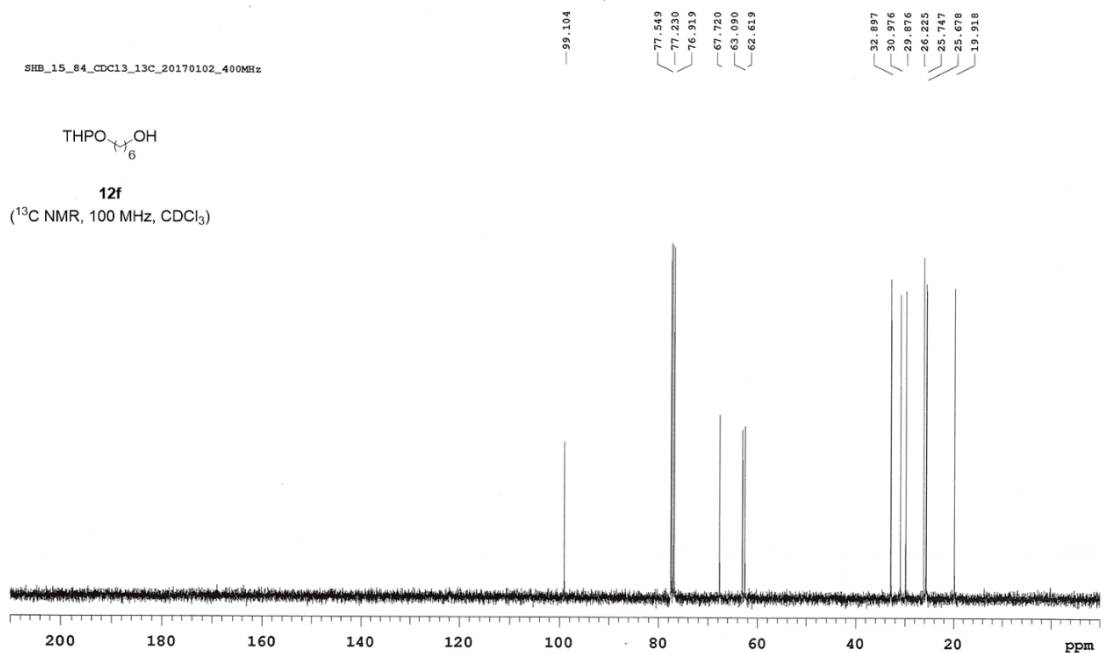

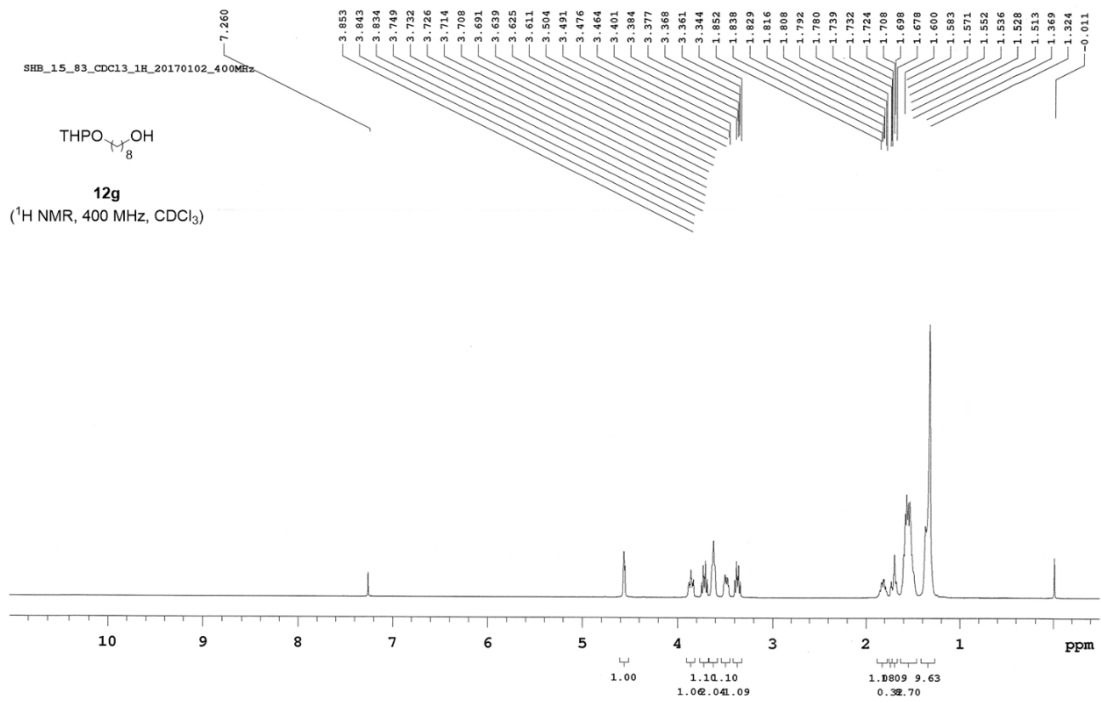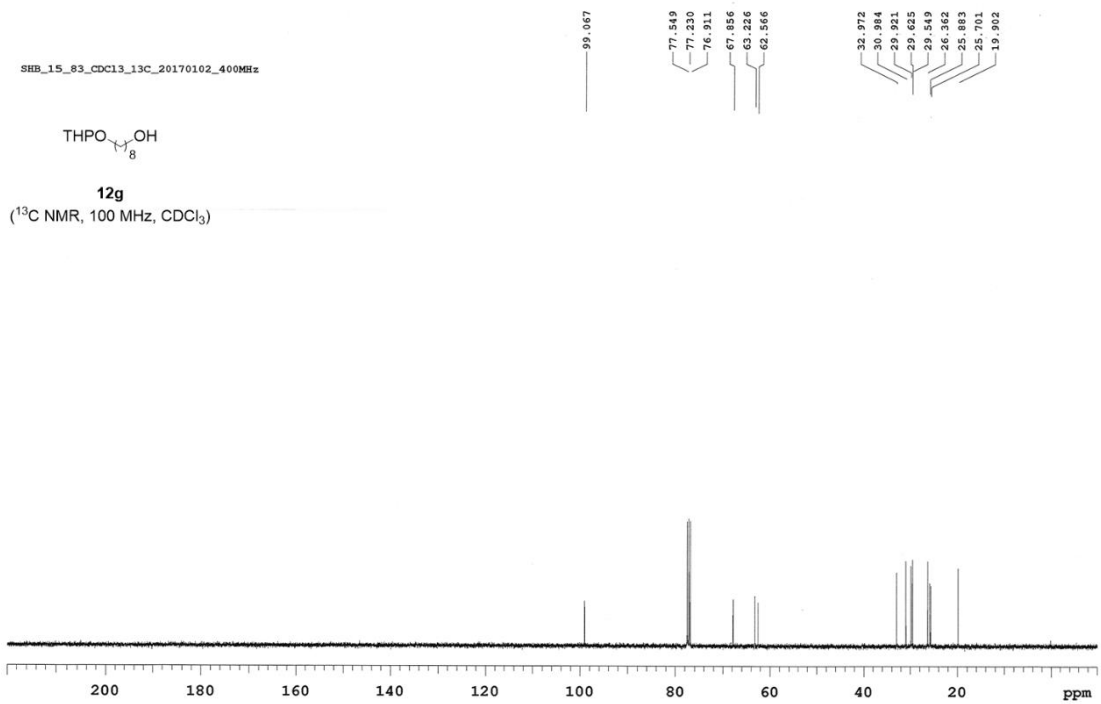

HYS-3-46\_1H400\_CDCl3\_20170109

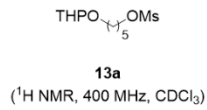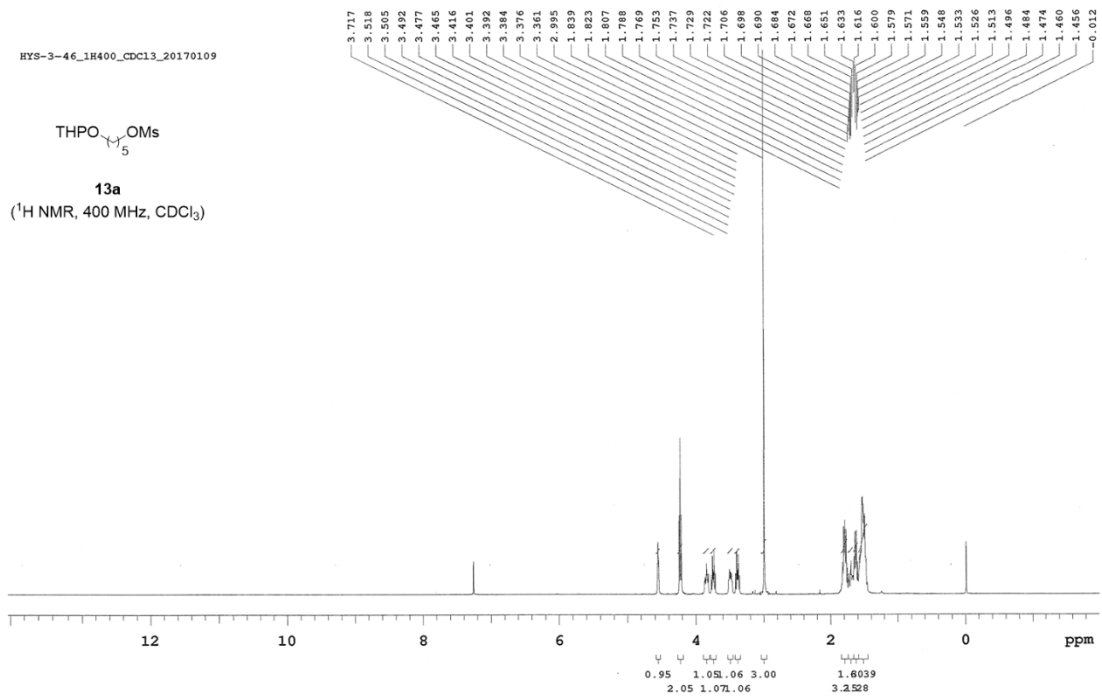

HYS-3-46\_13C400\_CDCl3\_20170109

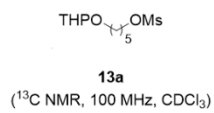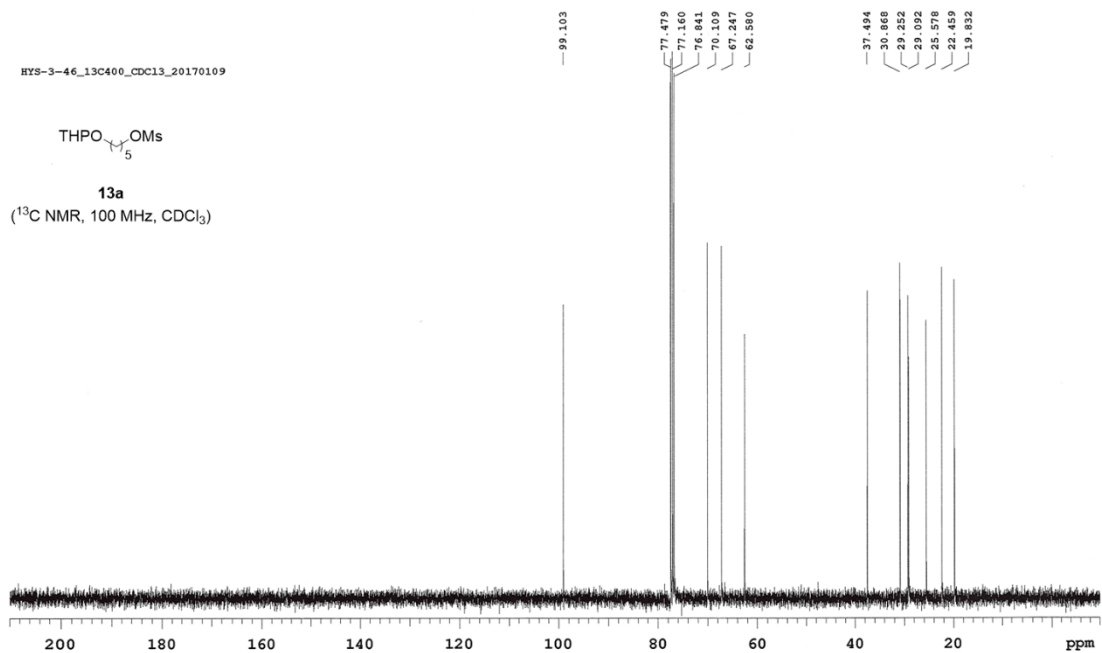

HYS-3-47\_1H400\_CDCl3\_20170107

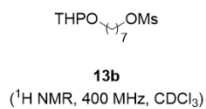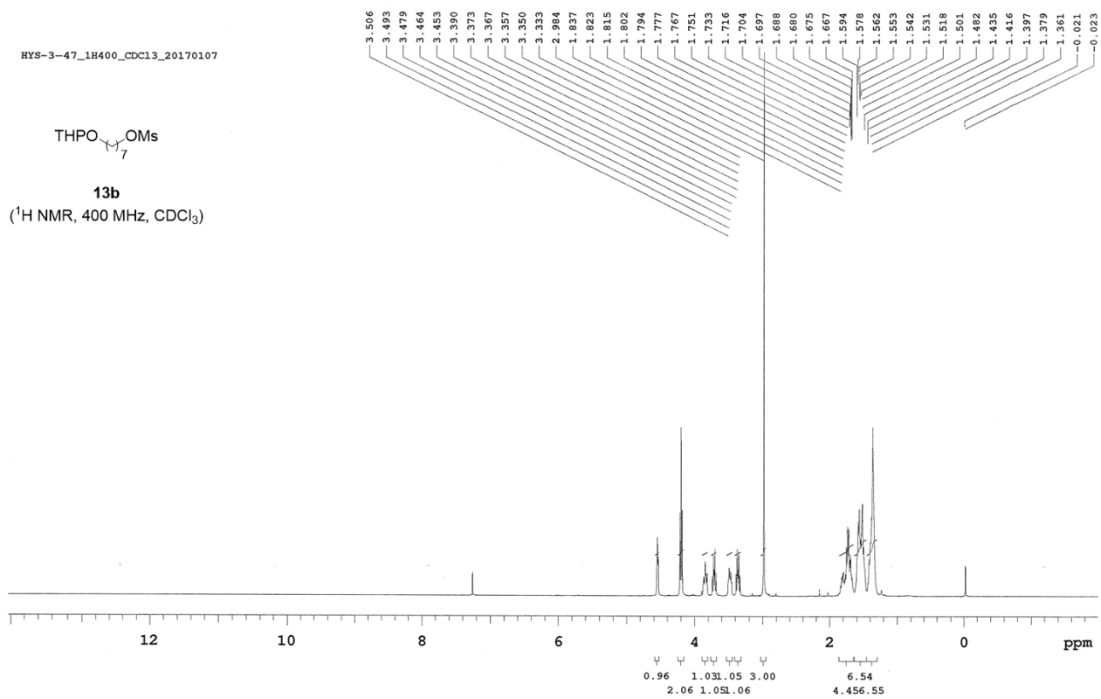

HYS-3-47\_13C400\_CDCl3\_20170107

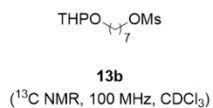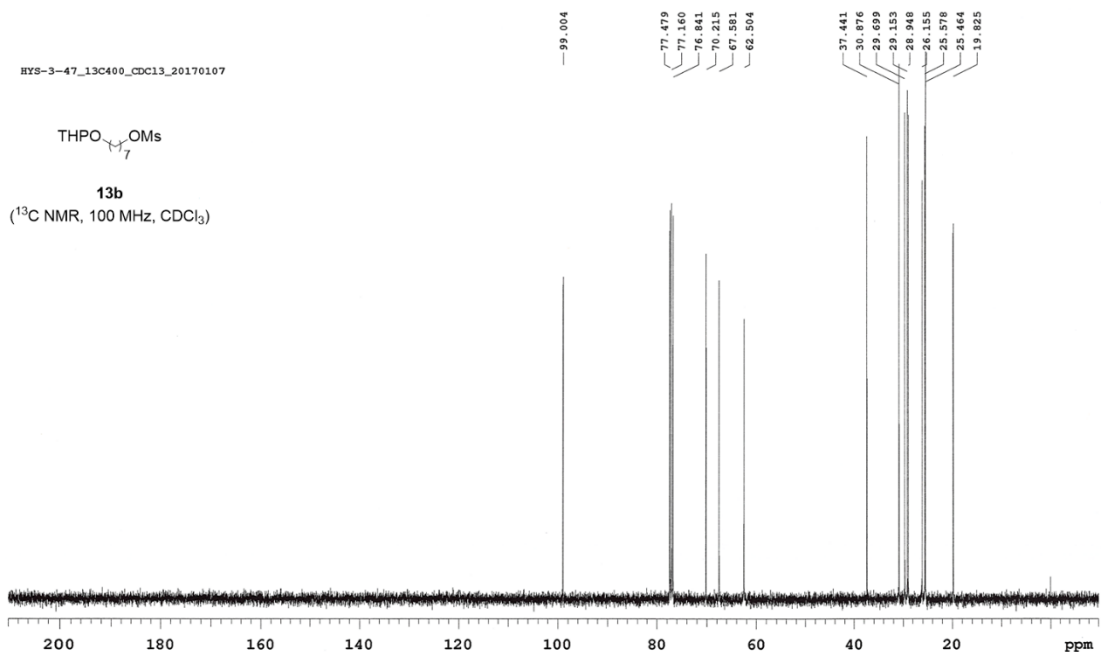



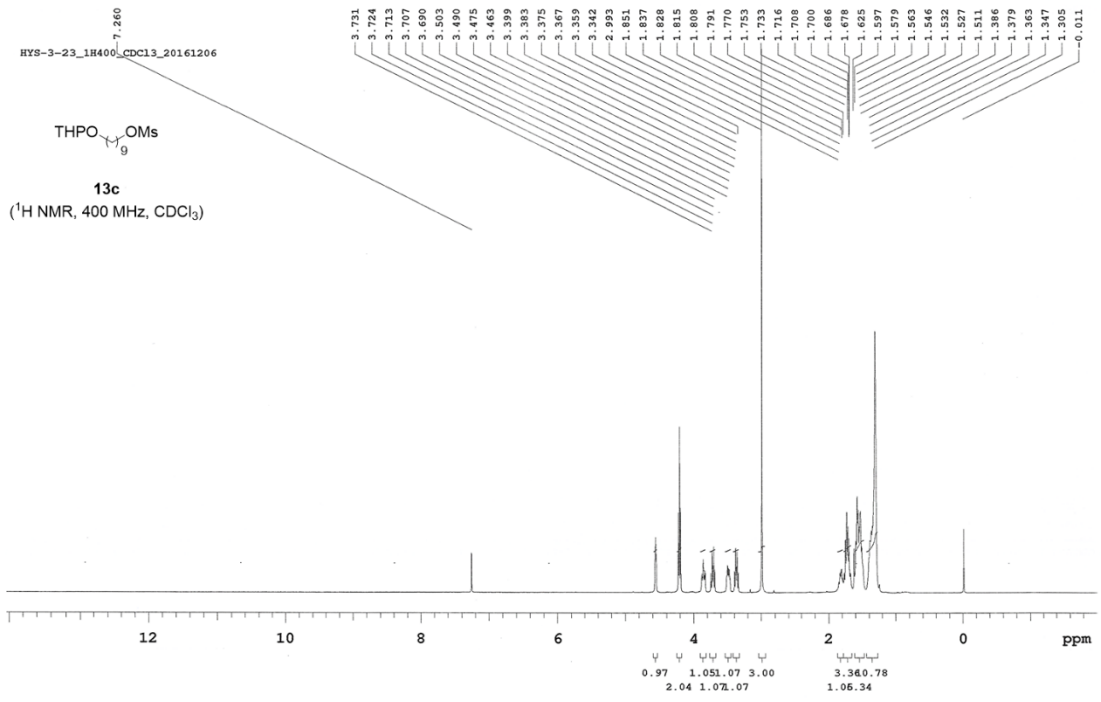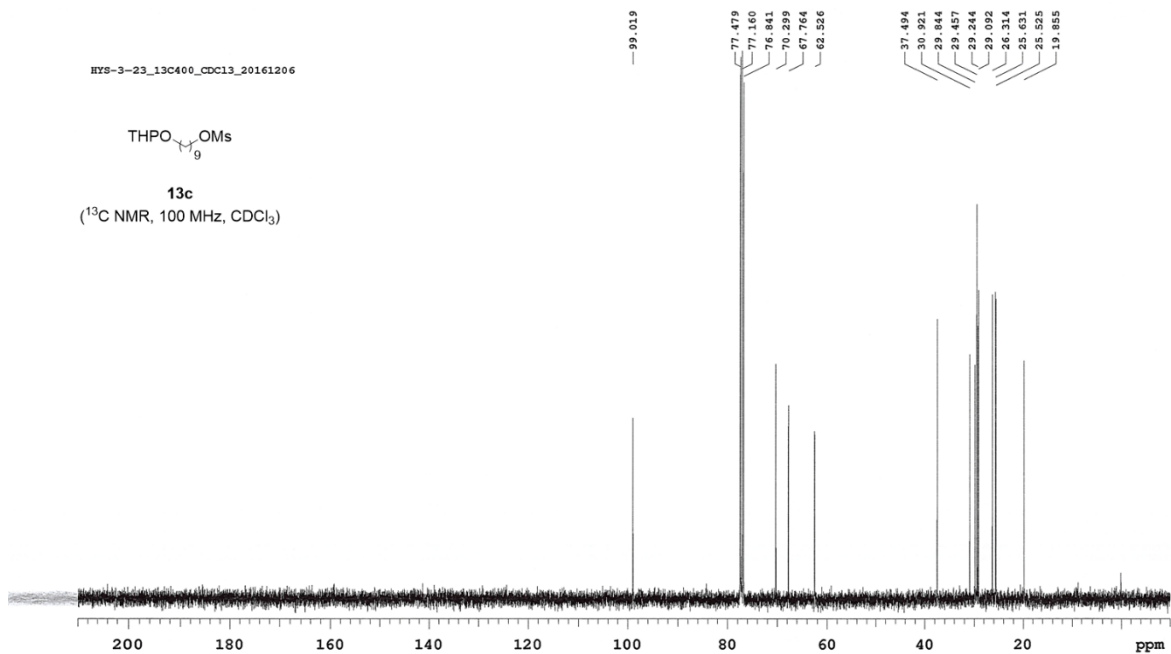

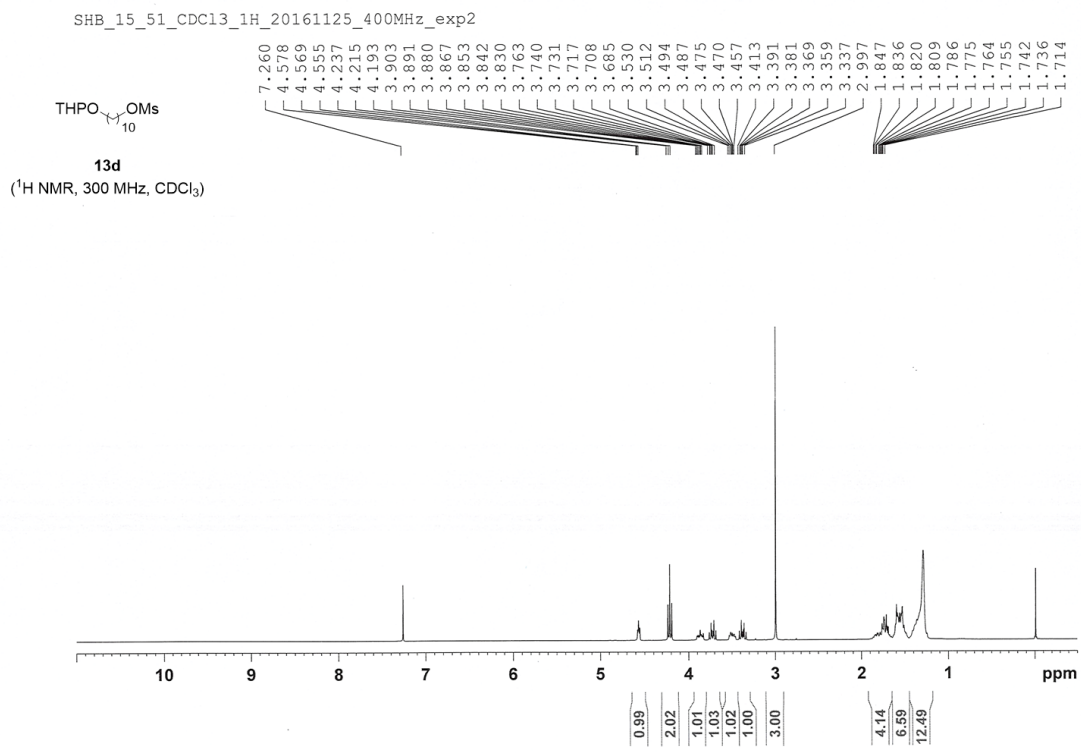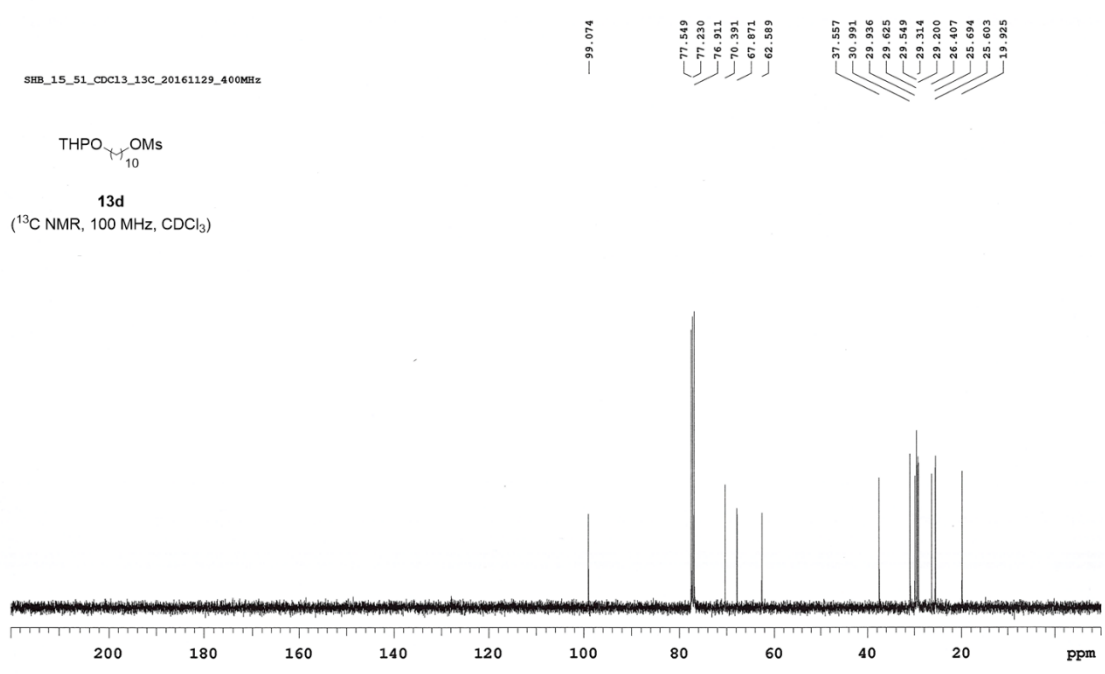

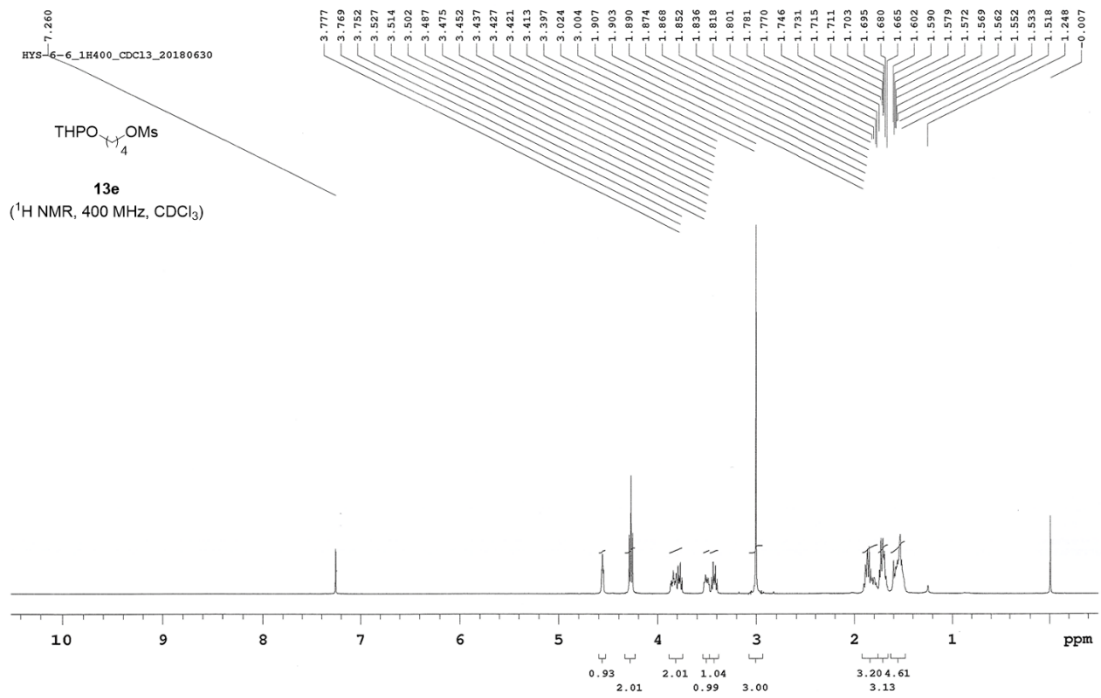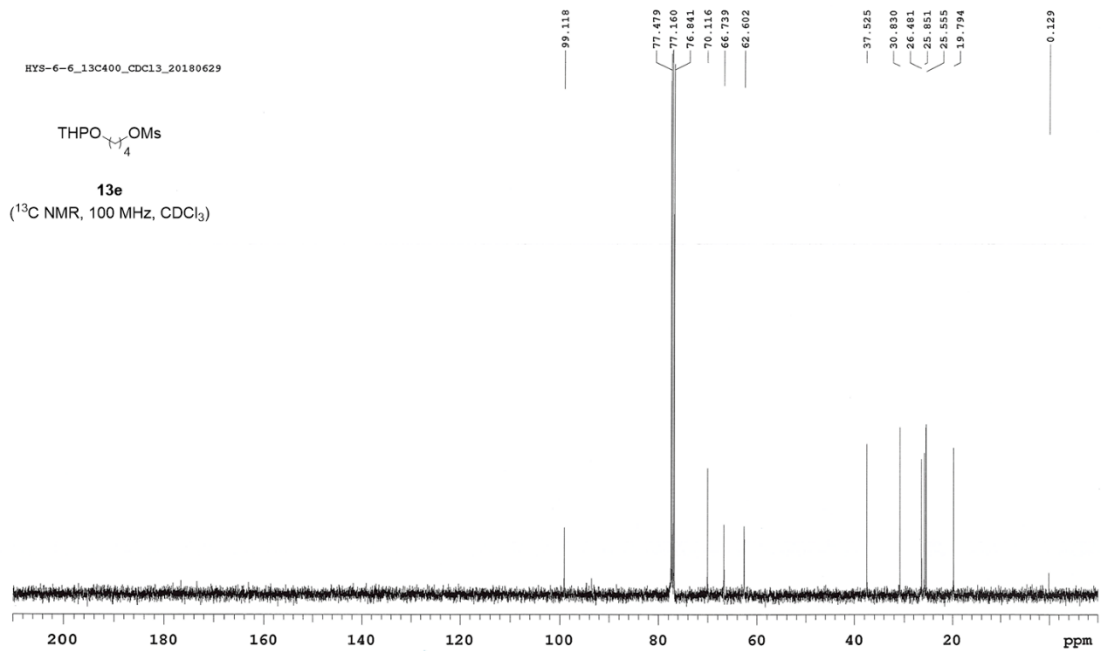

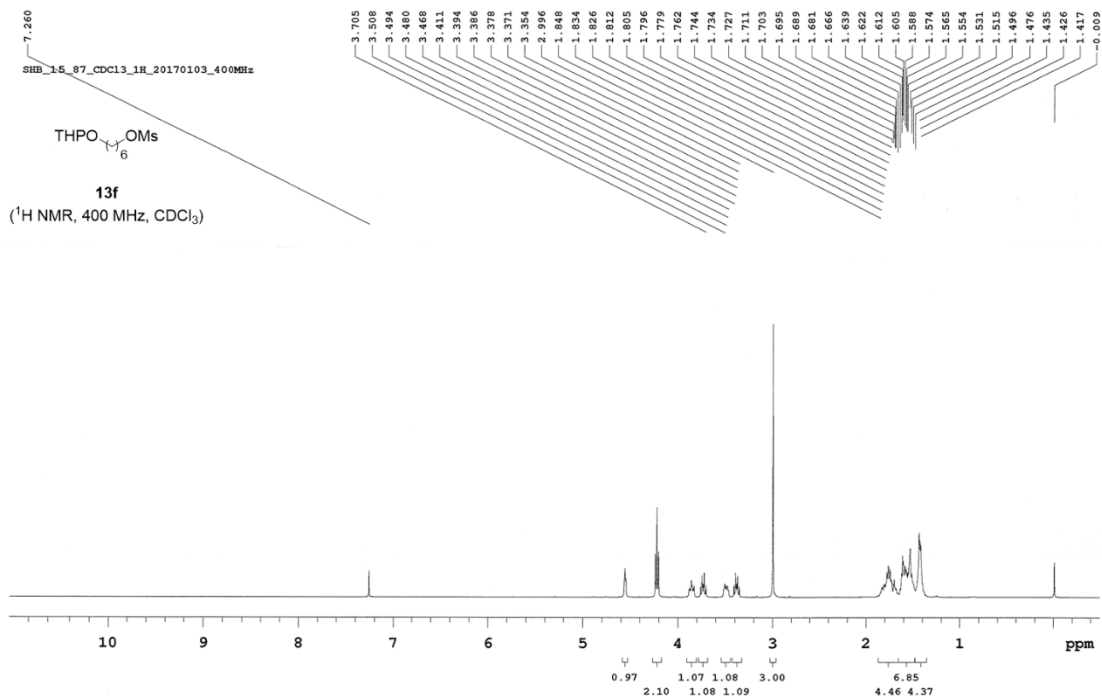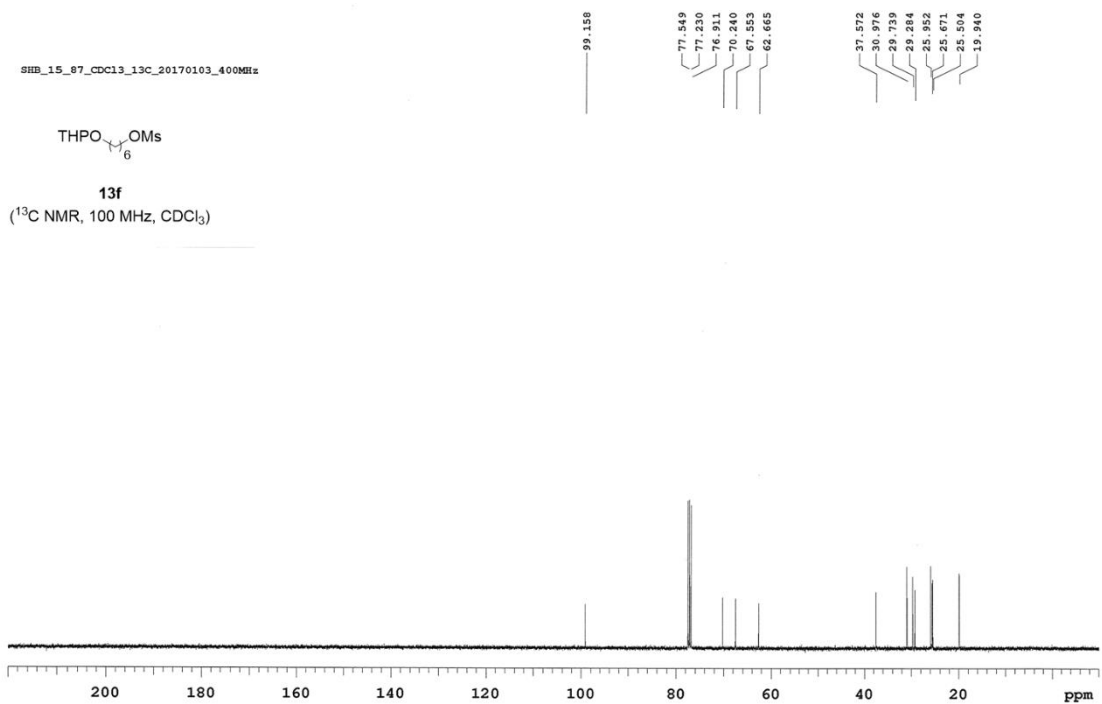

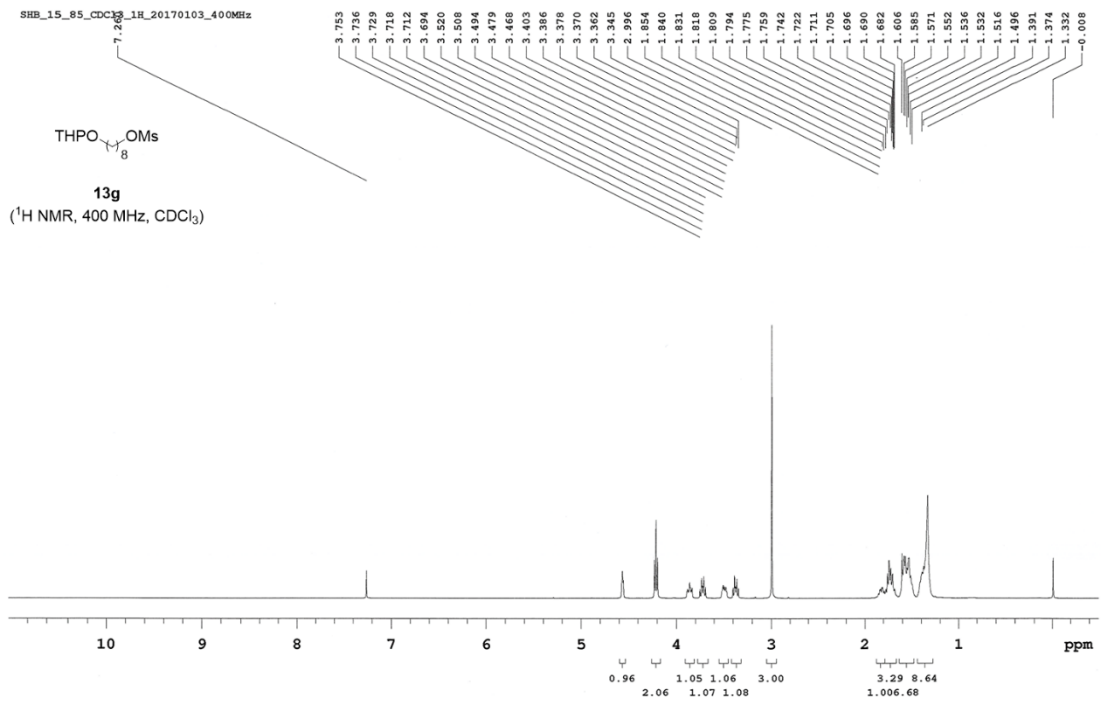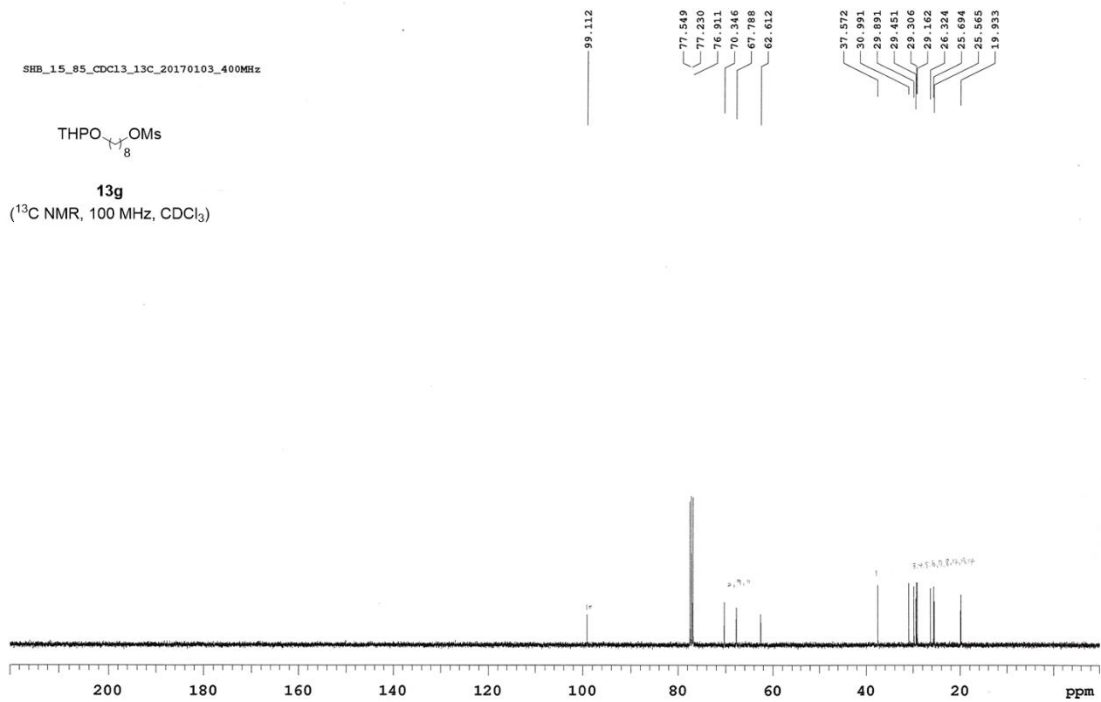

HYS-3-48A\_1H400\_CDC13\_20170110

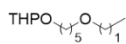

**14a**  
(<sup>1</sup>H NMR, 400 MHz, CDCl<sub>3</sub>)

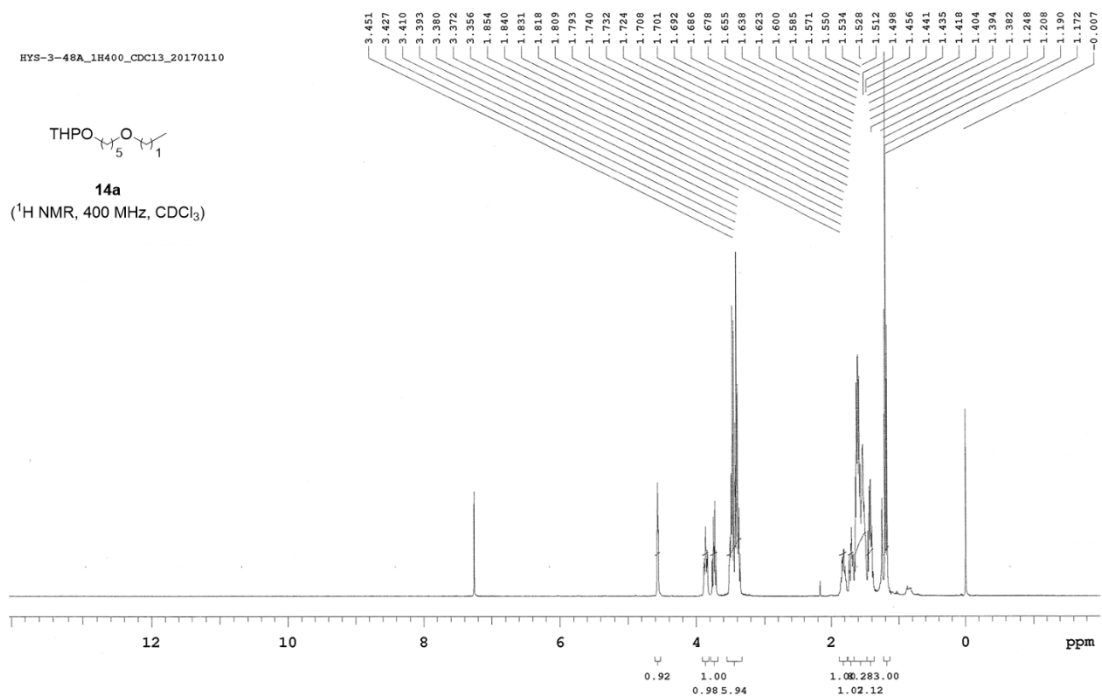

HYS-3-48A\_13C400\_CDC13\_20170110

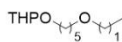

**14a**  
(<sup>13</sup>C NMR, 100 MHz, CDCl<sub>3</sub>)

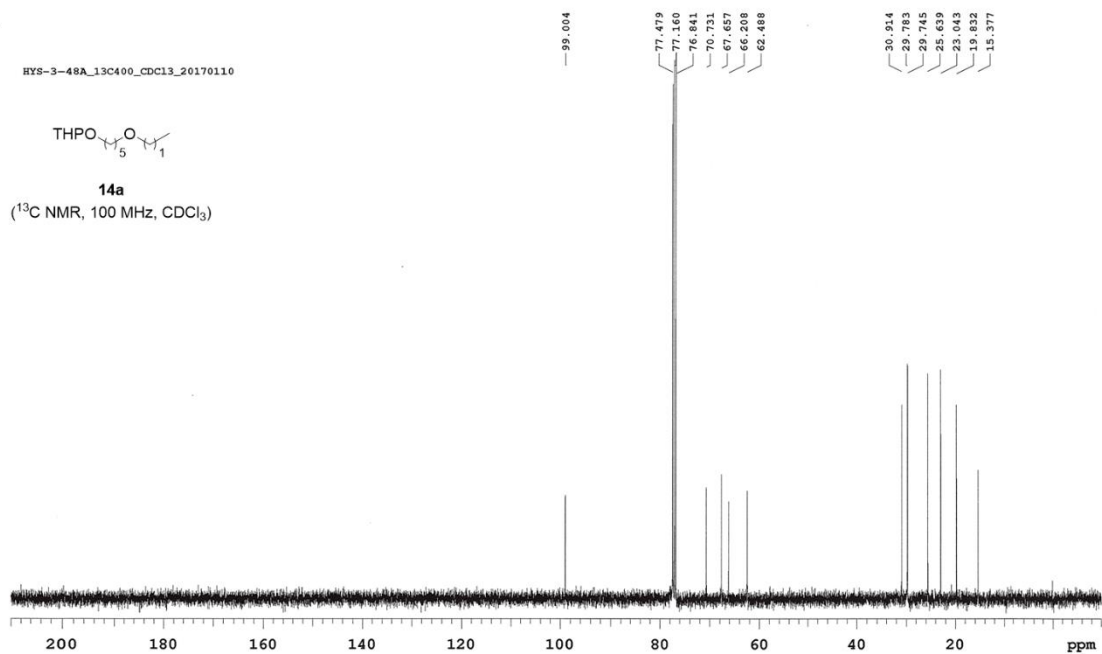

HYS-3-48B\_1H400\_CDCl3\_20170110

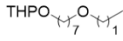

**14b**  
(<sup>1</sup>H NMR, 400 MHz, CDCl<sub>3</sub>)

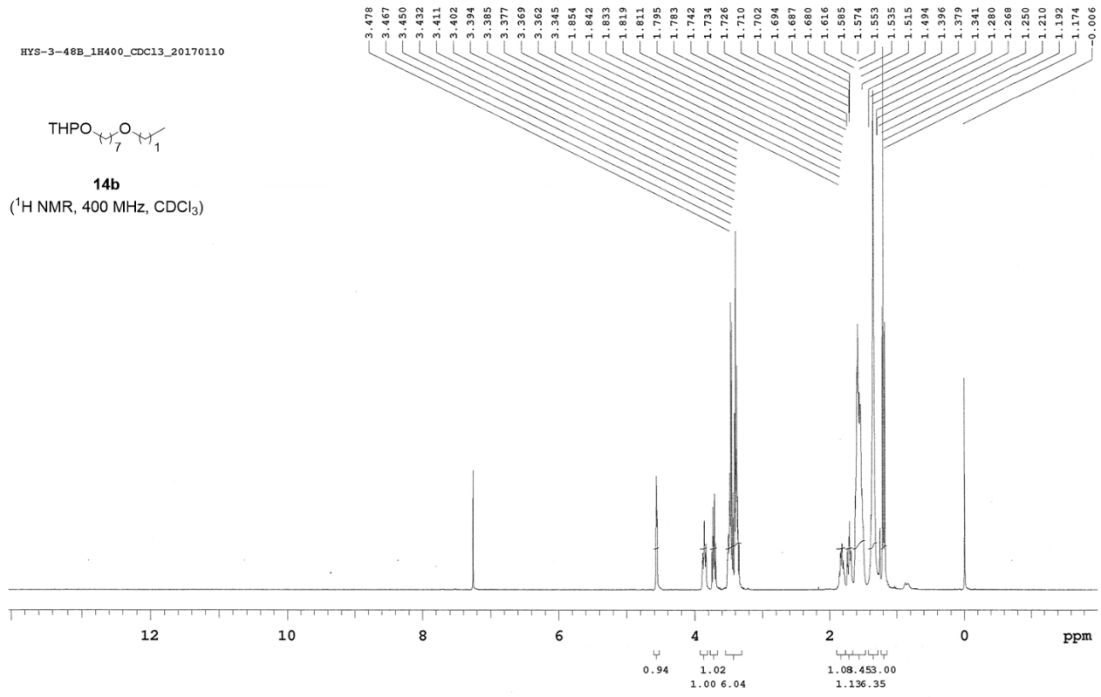

HYS-3-48B\_13C400\_CDCl3\_20170110

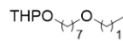

**14b**  
(<sup>13</sup>C NMR, 100 MHz, CDCl<sub>3</sub>)

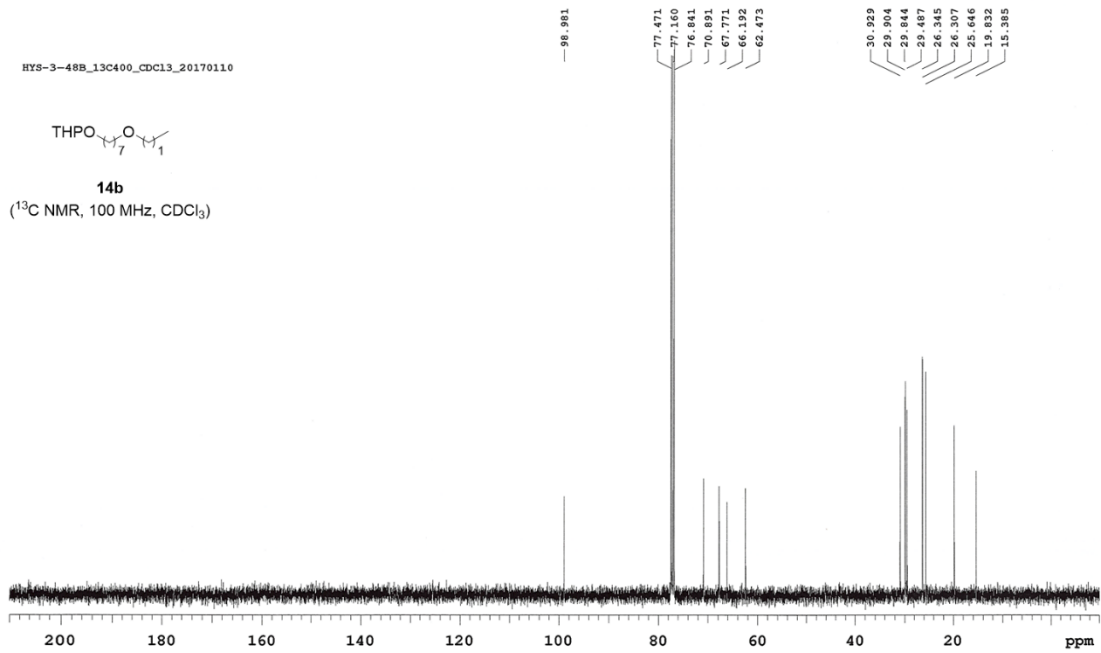

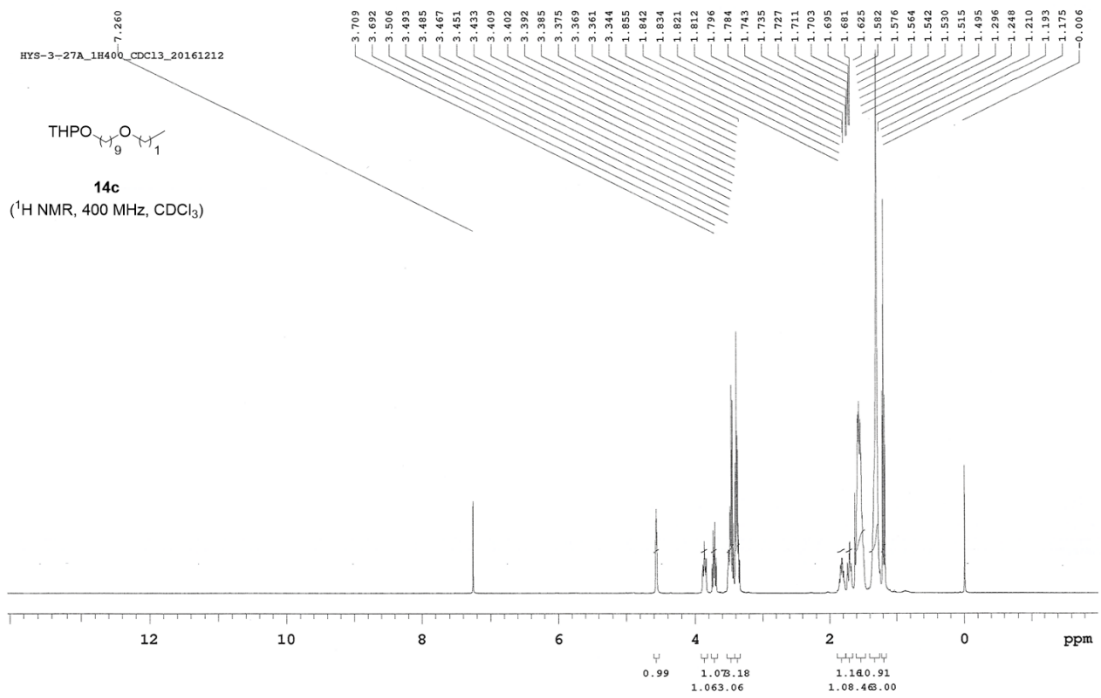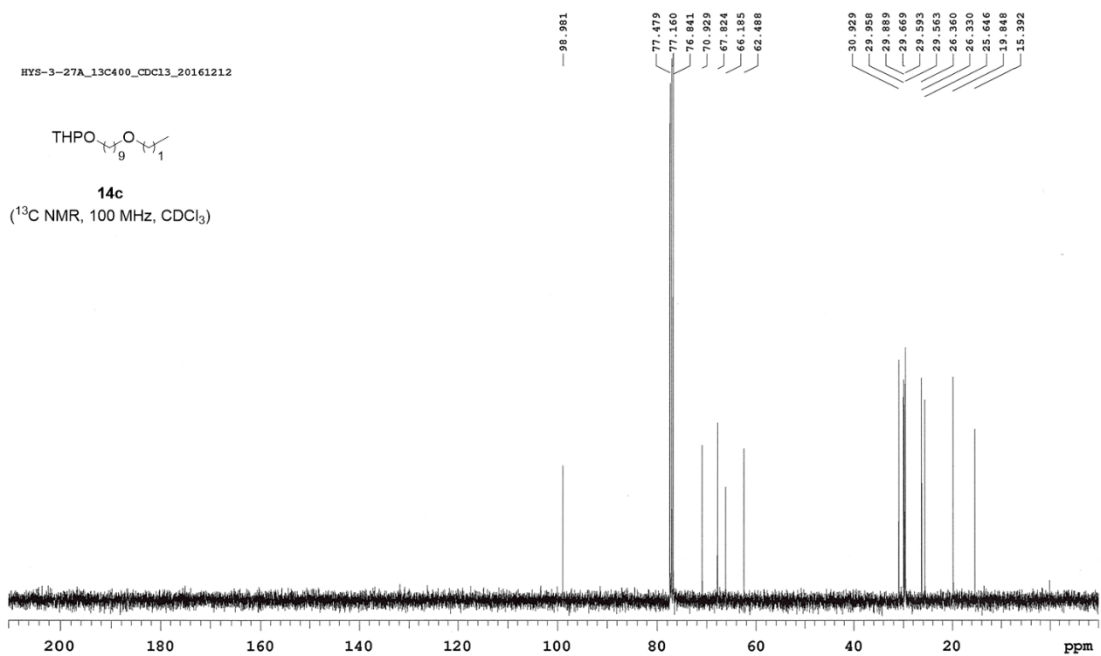



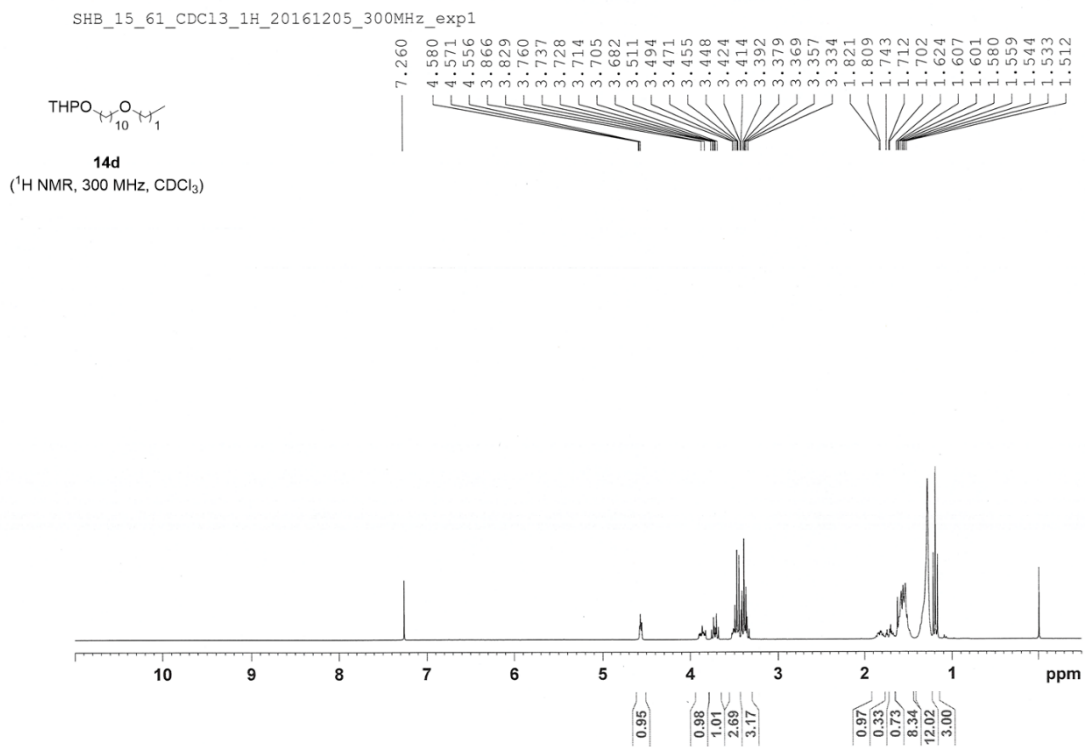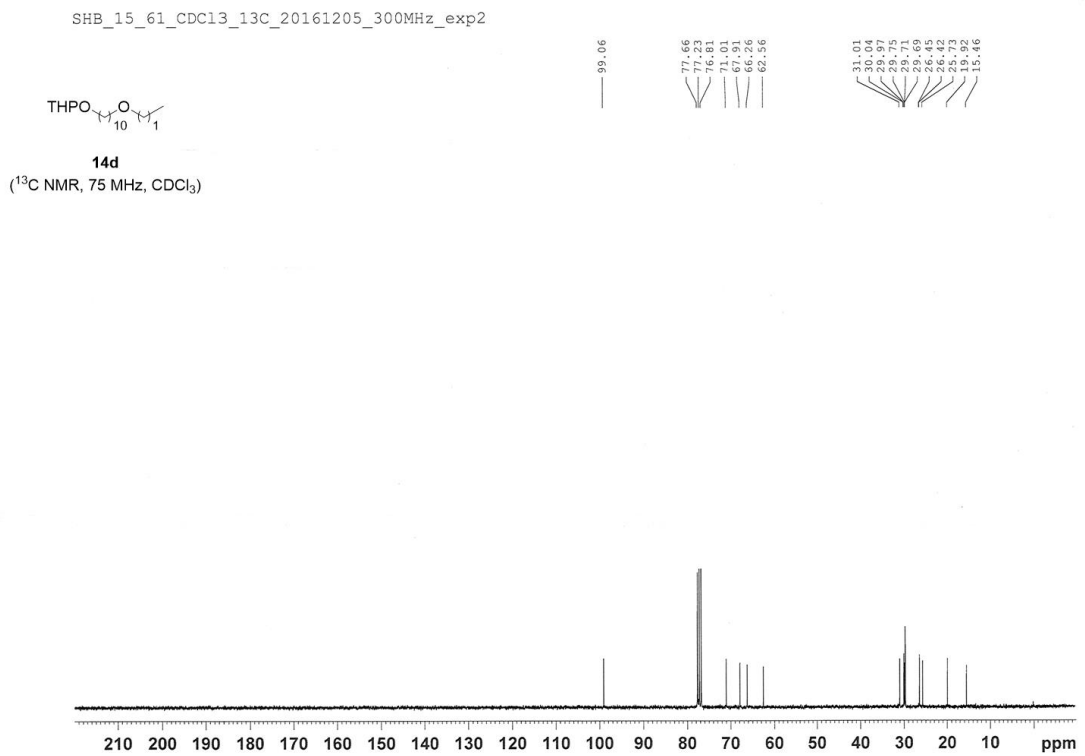

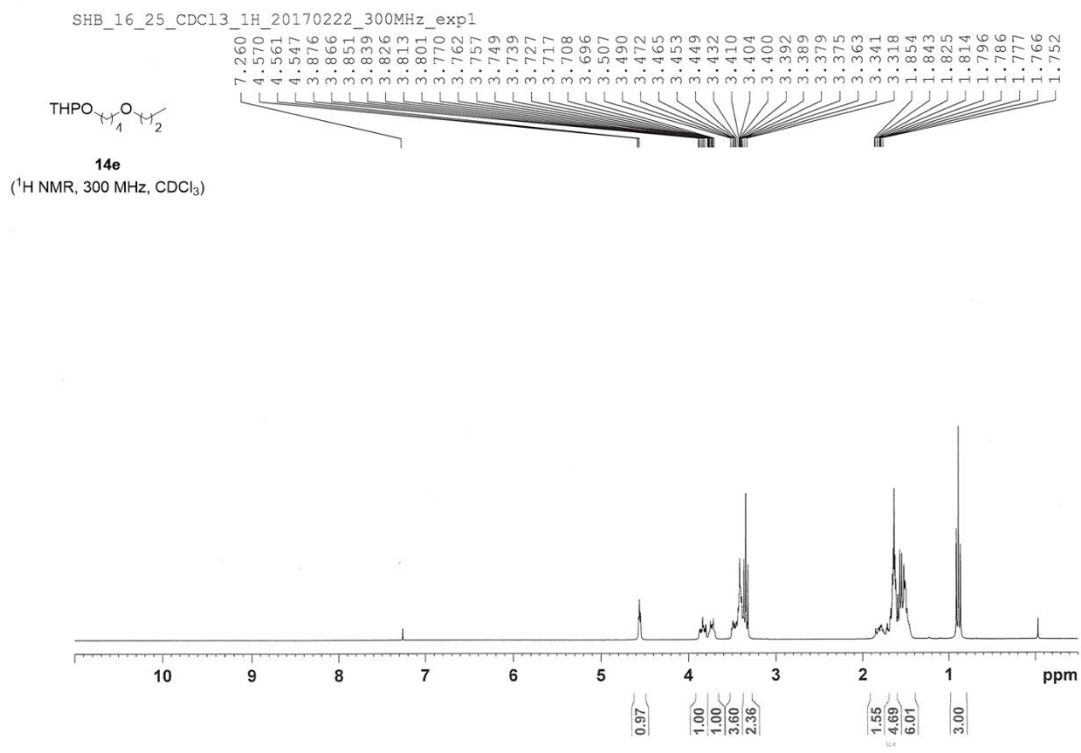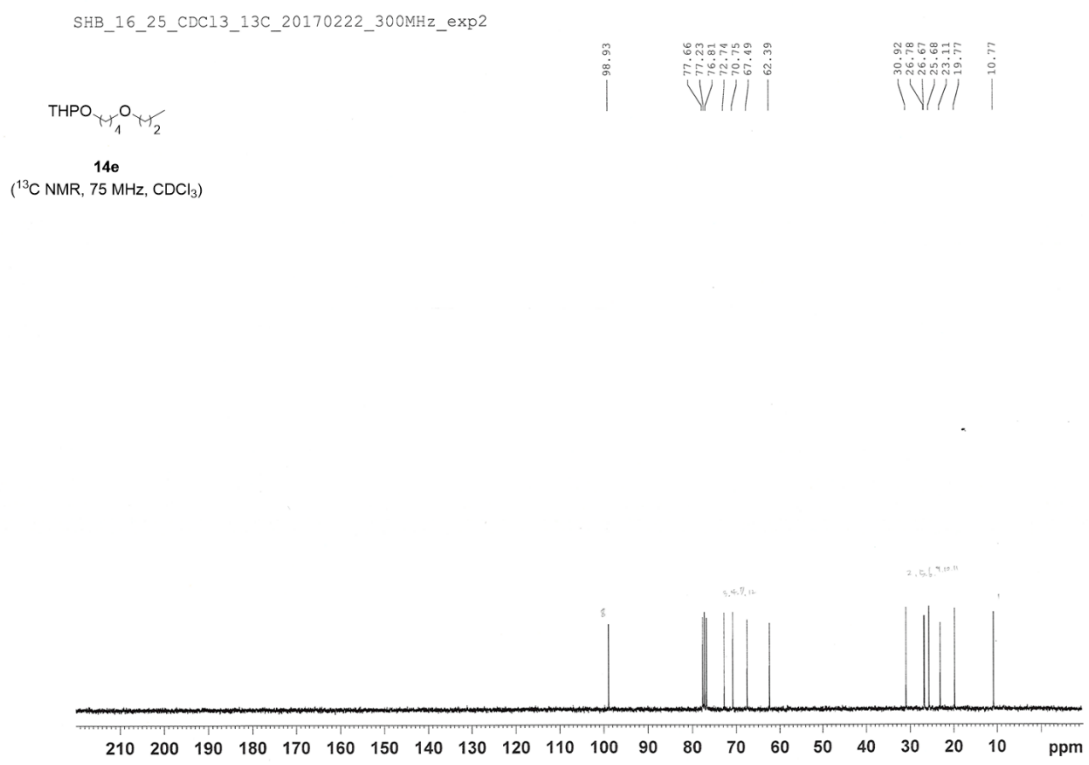

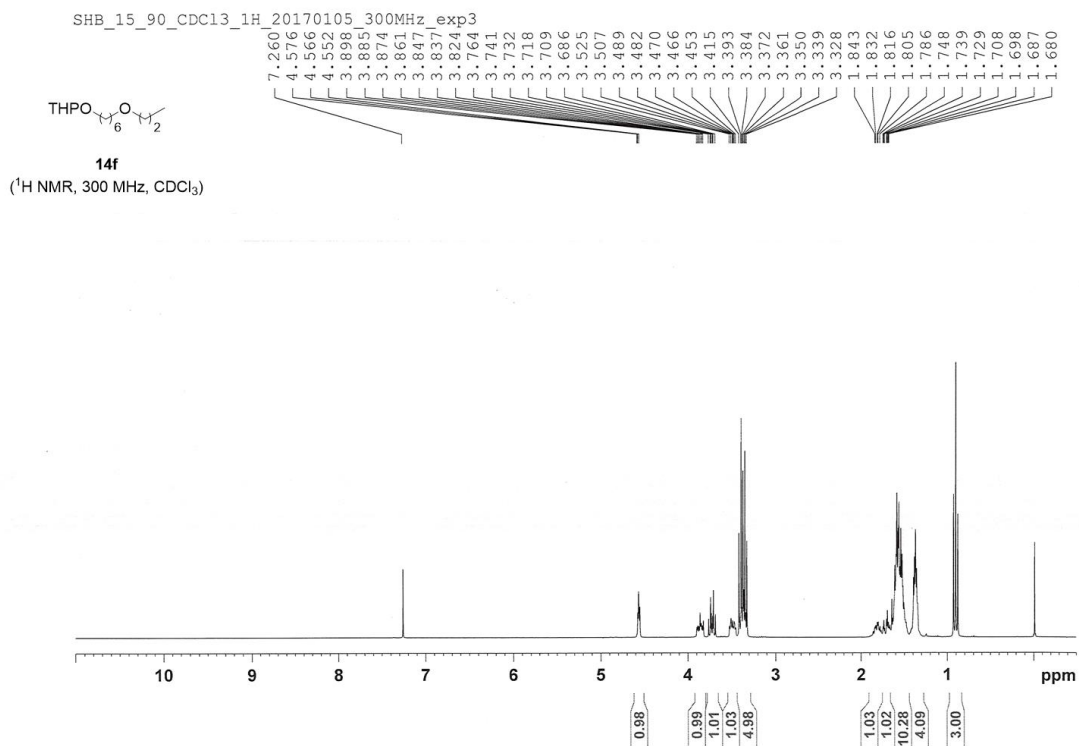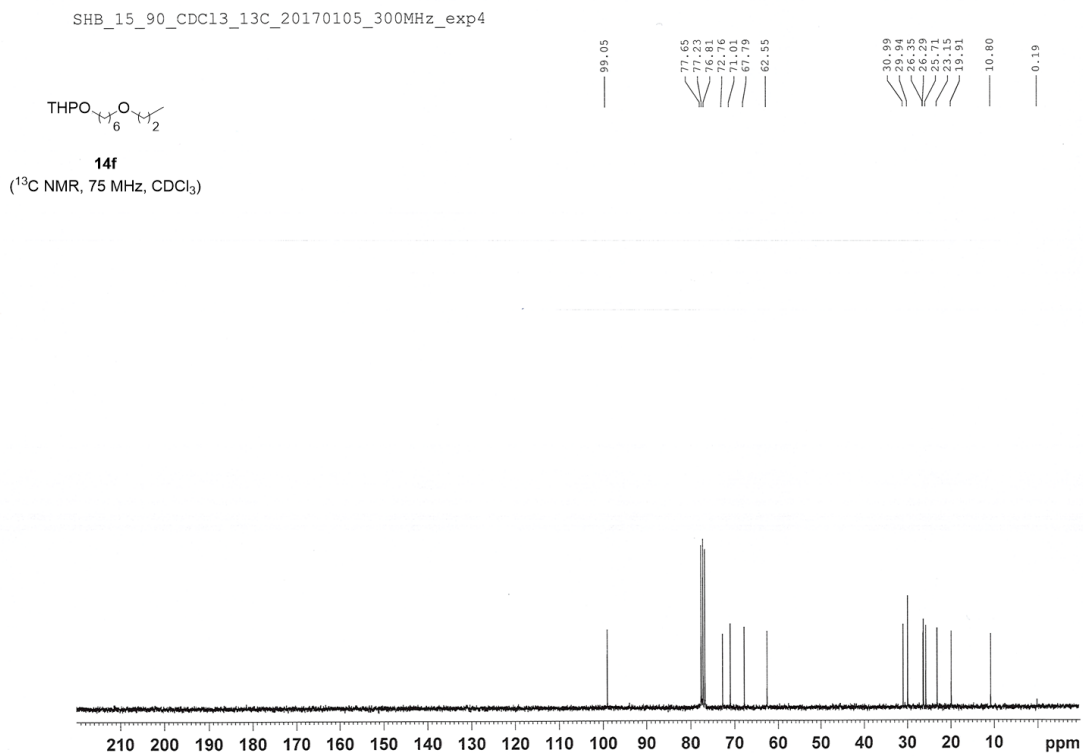

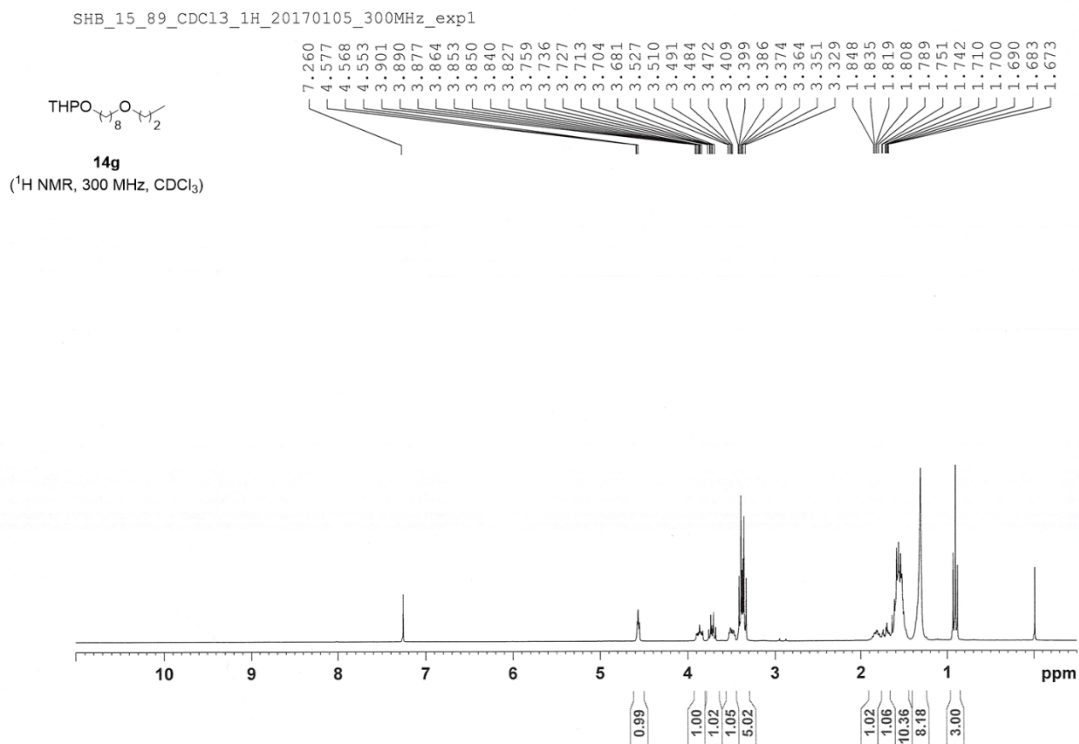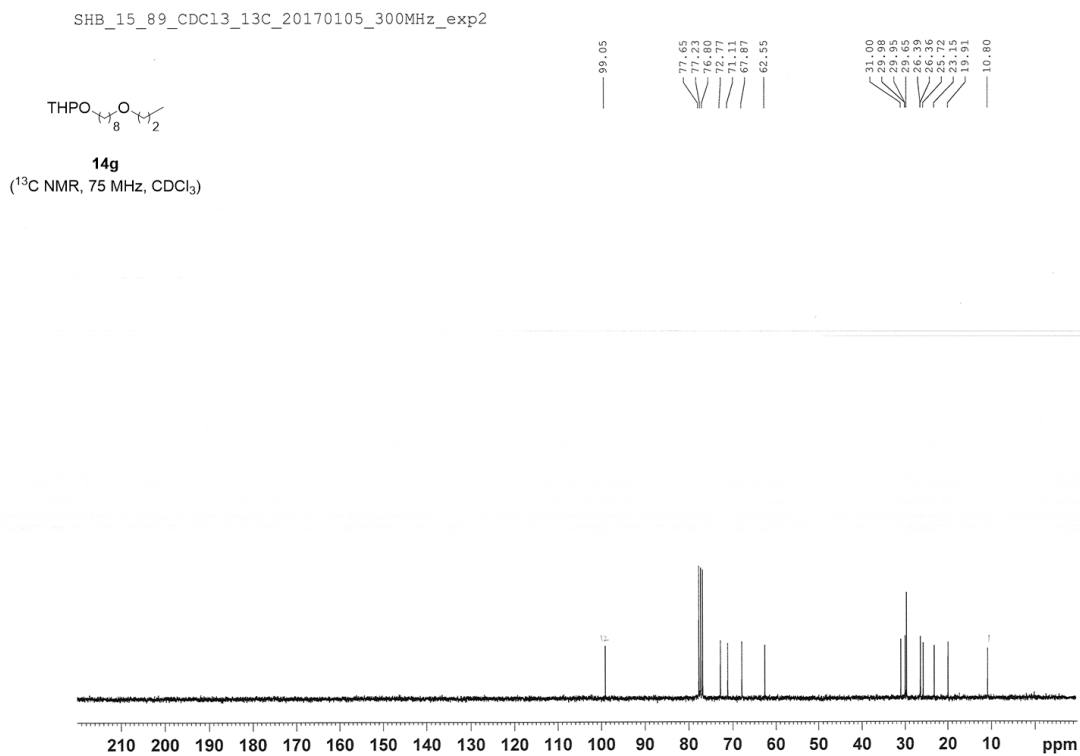

HYS-3-24\_1H400\_CDCl3\_20171220

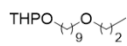

**14h**  
(<sup>1</sup>H NMR, 400 MHz, CDCl<sub>3</sub>)

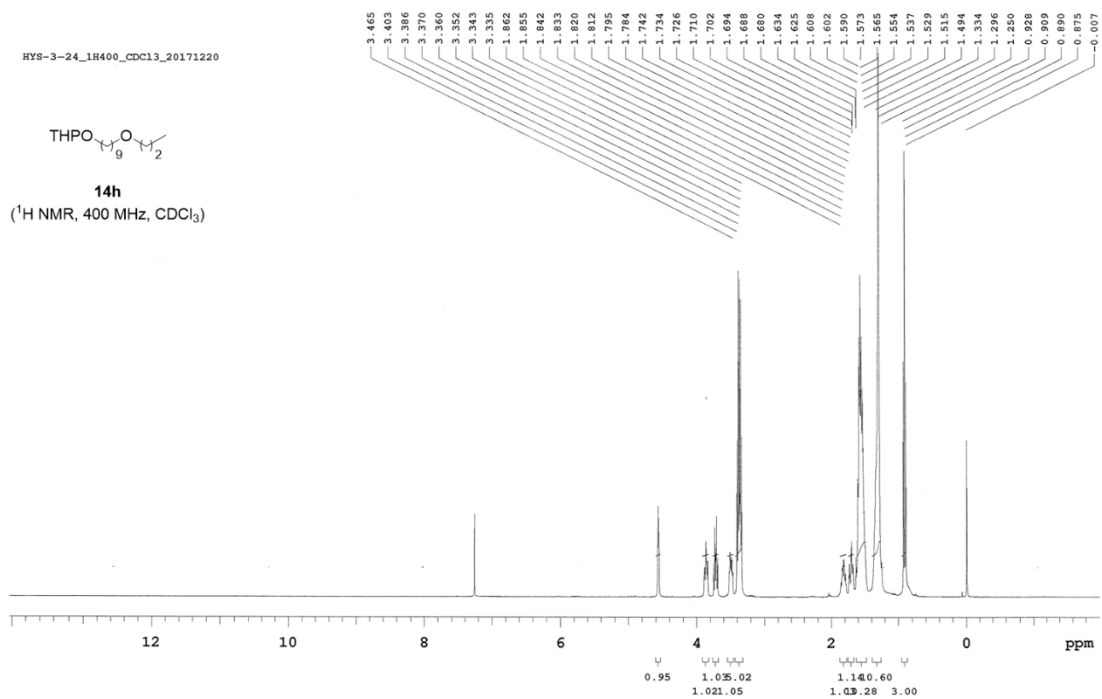

HYS-3-24\_13C400\_CDCl3\_20161208

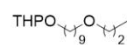

**14h**  
(<sup>13</sup>C NMR, 100 MHz, CDCl<sub>3</sub>)

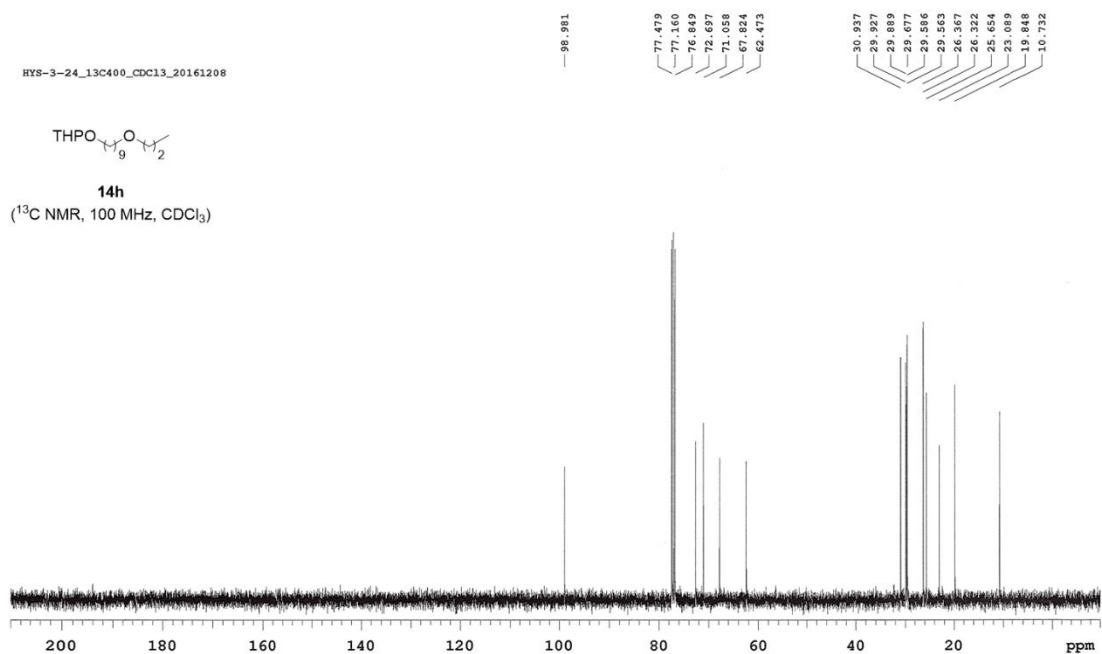

HYS-3-49A\_1H400\_CDCl3\_20170113

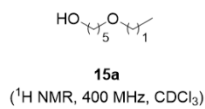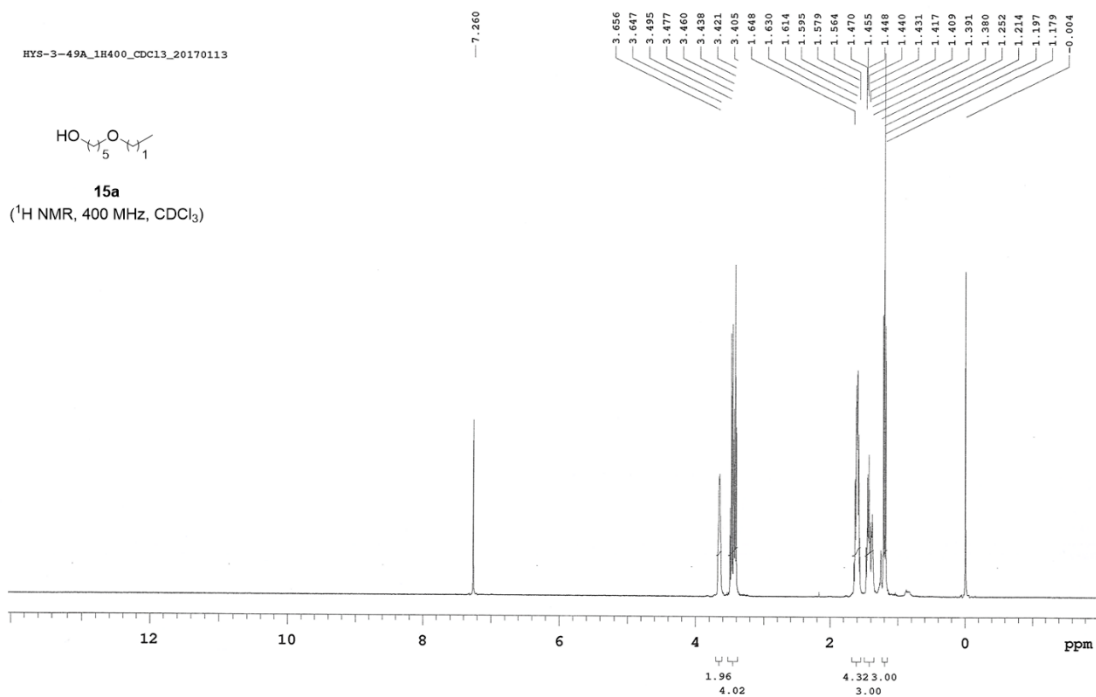

HYS-3-49A\_13C400\_CDCl3\_20170113

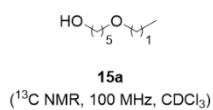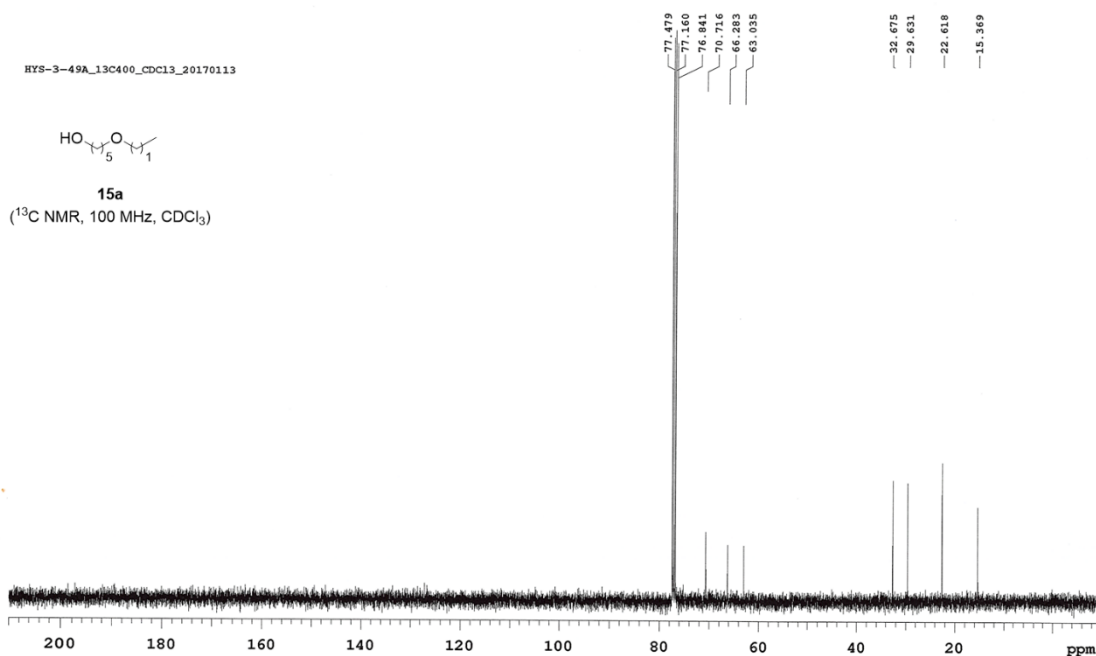

HYS-3-49B\_1H400\_CDCl3\_20170113

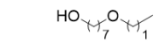

**15b**  
(<sup>1</sup>H NMR, 400 MHz, CDCl<sub>3</sub>)

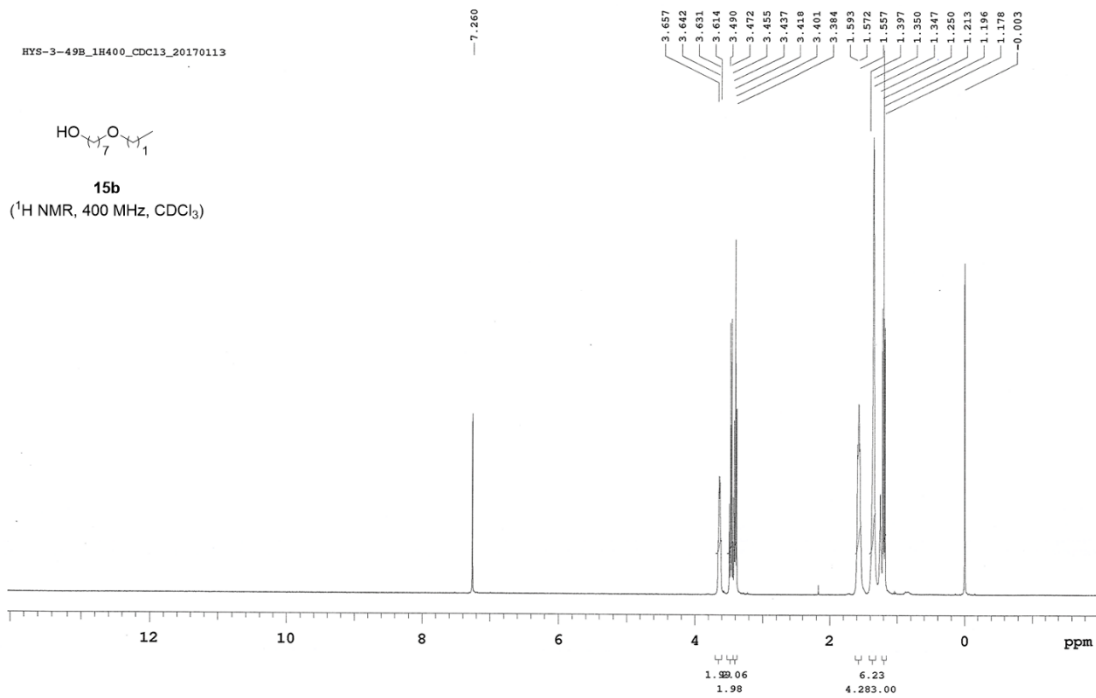

HYS-3-49B\_13C400\_CDCl3\_20170113

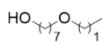

**15b**  
(<sup>13</sup>C NMR, 100 MHz, CDCl<sub>3</sub>)

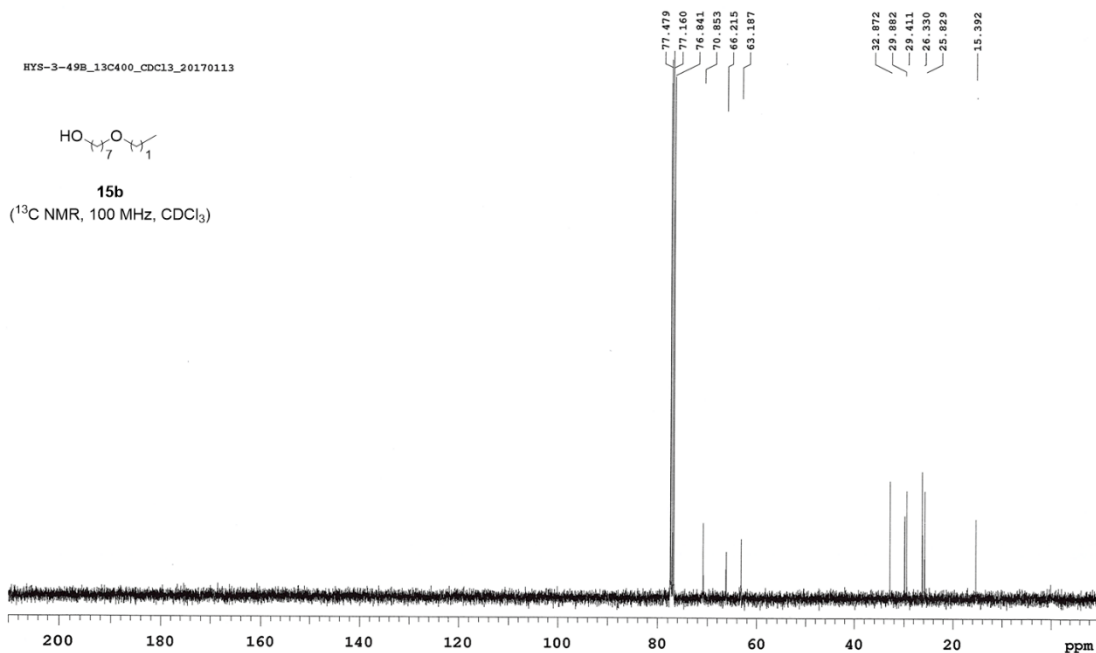

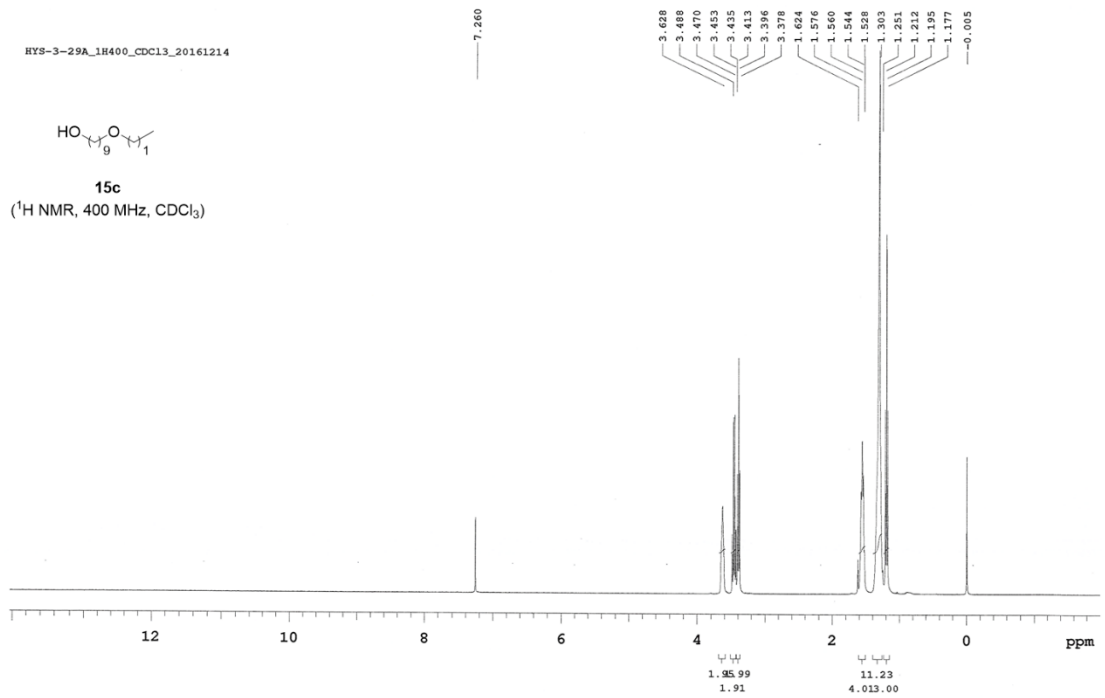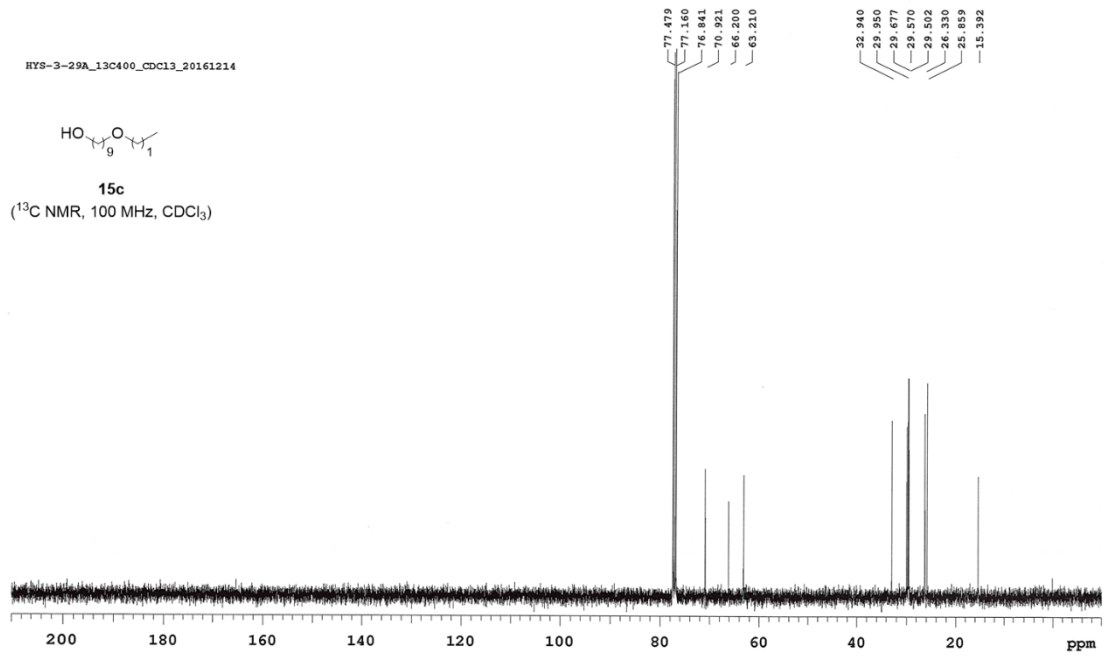



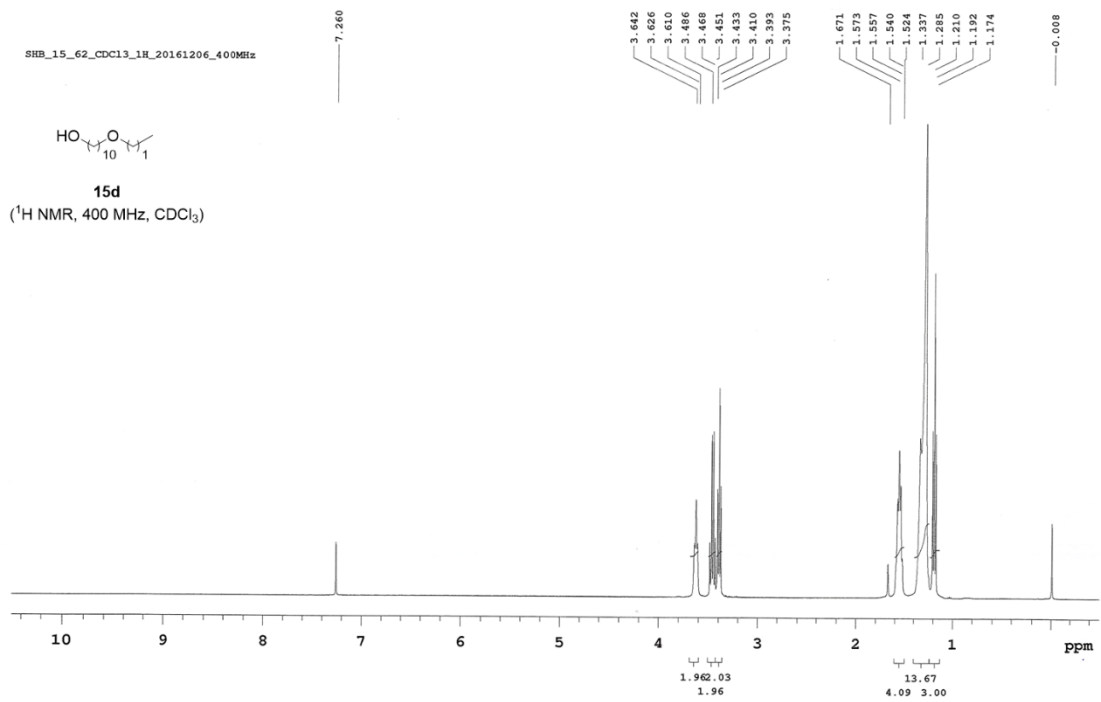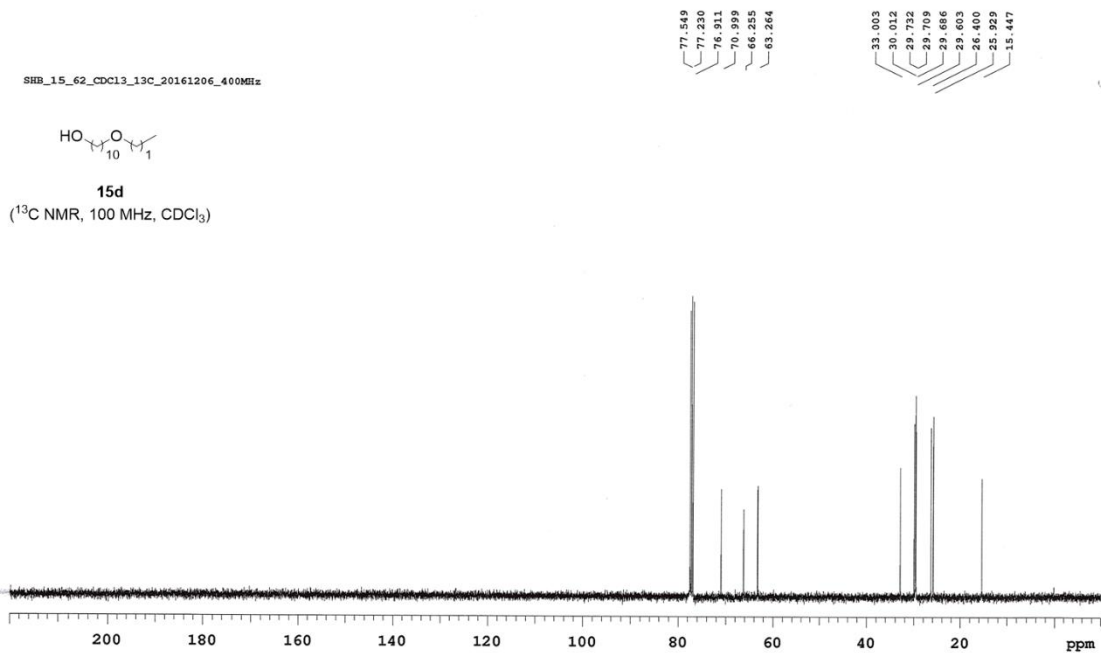

SHB\_16\_27\_CDC13\_1H\_20170223\_300MHz\_exp1

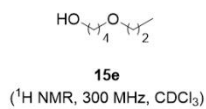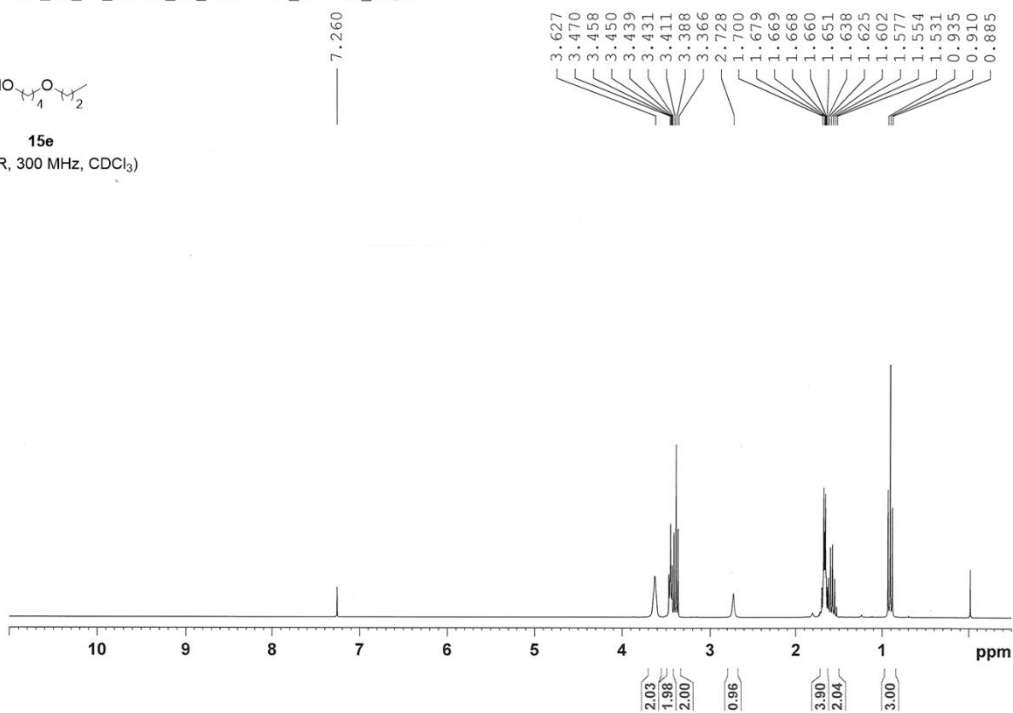

SHB\_16\_27\_CDC13\_13C\_20170223\_300MHz\_exp2

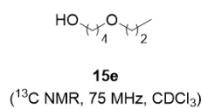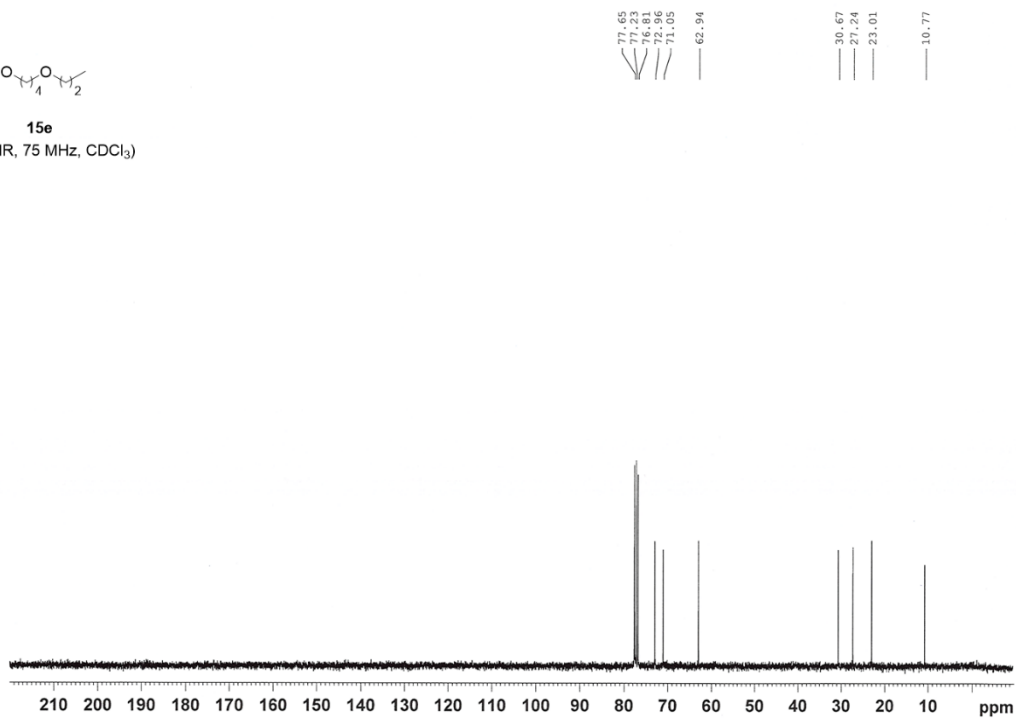

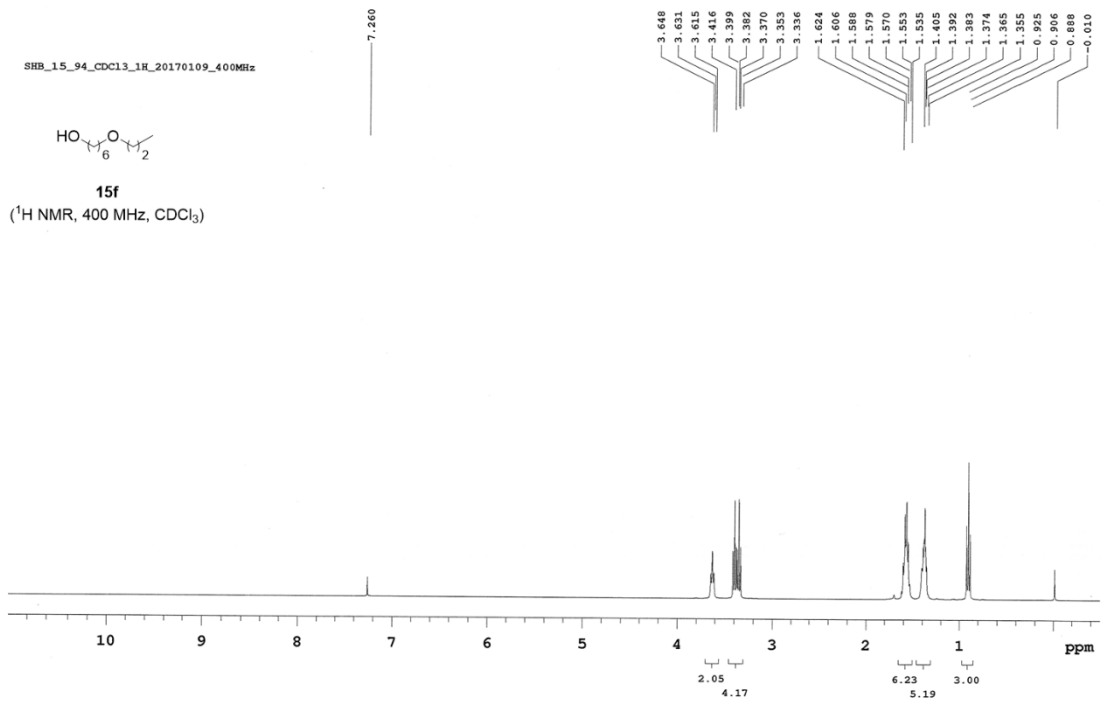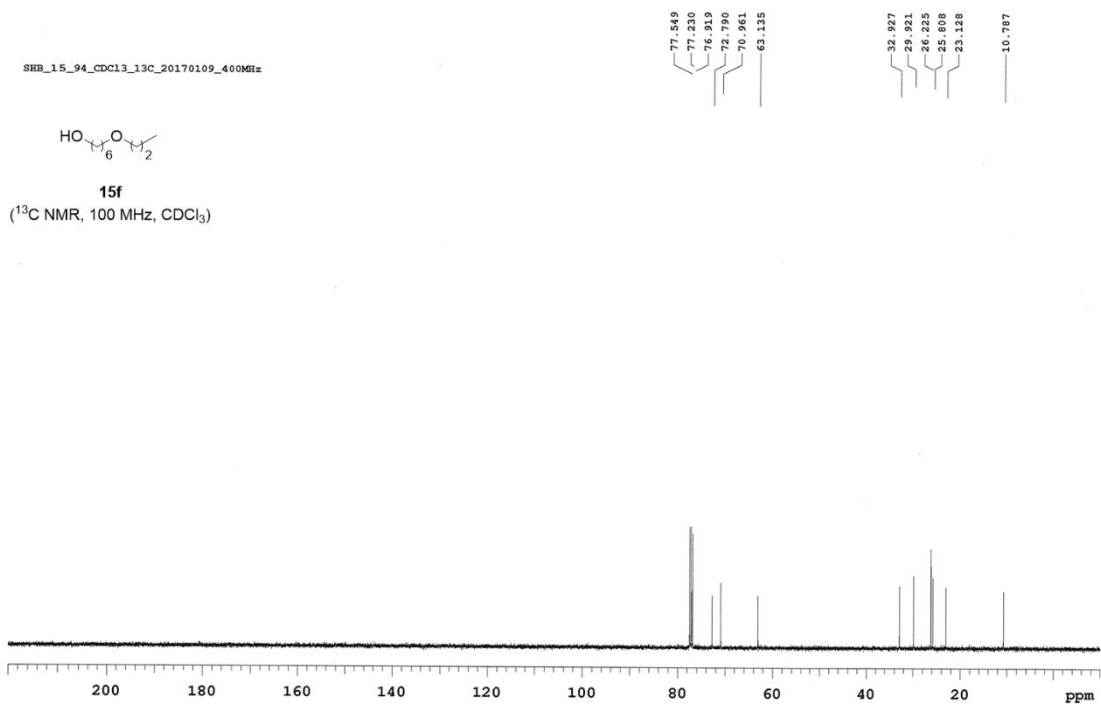

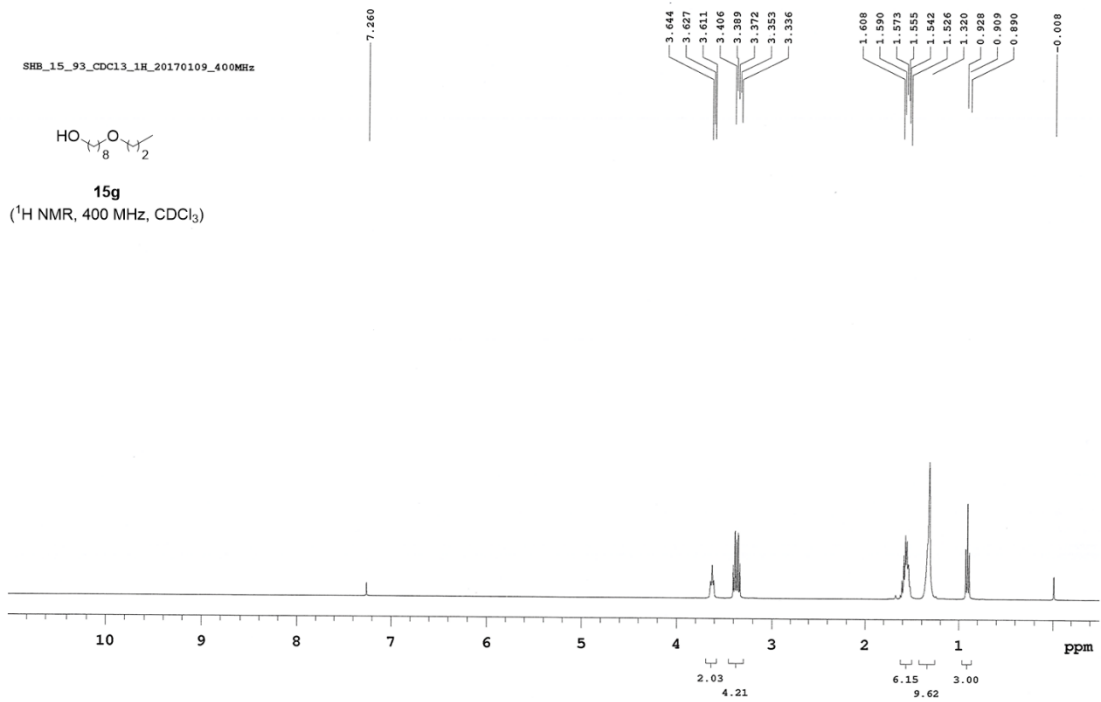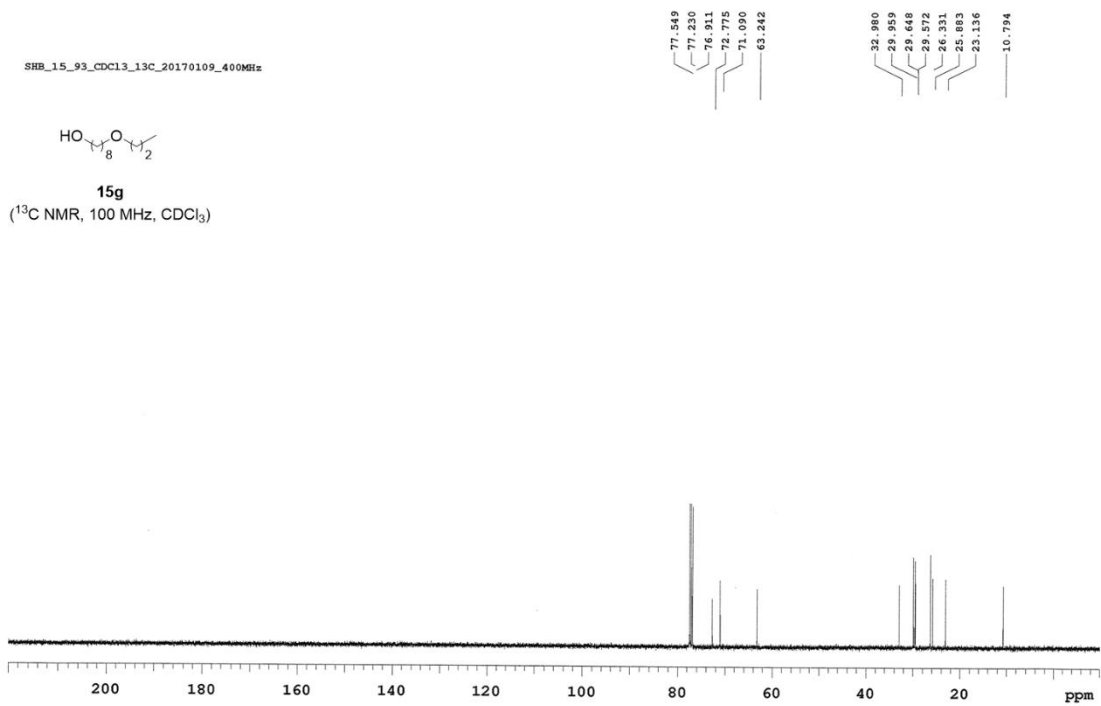

HYS-3-29B\_1H400\_CDCl3\_20161214

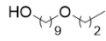

**15h**  
(<sup>1</sup>H NMR, 400 MHz, CDCl<sub>3</sub>)

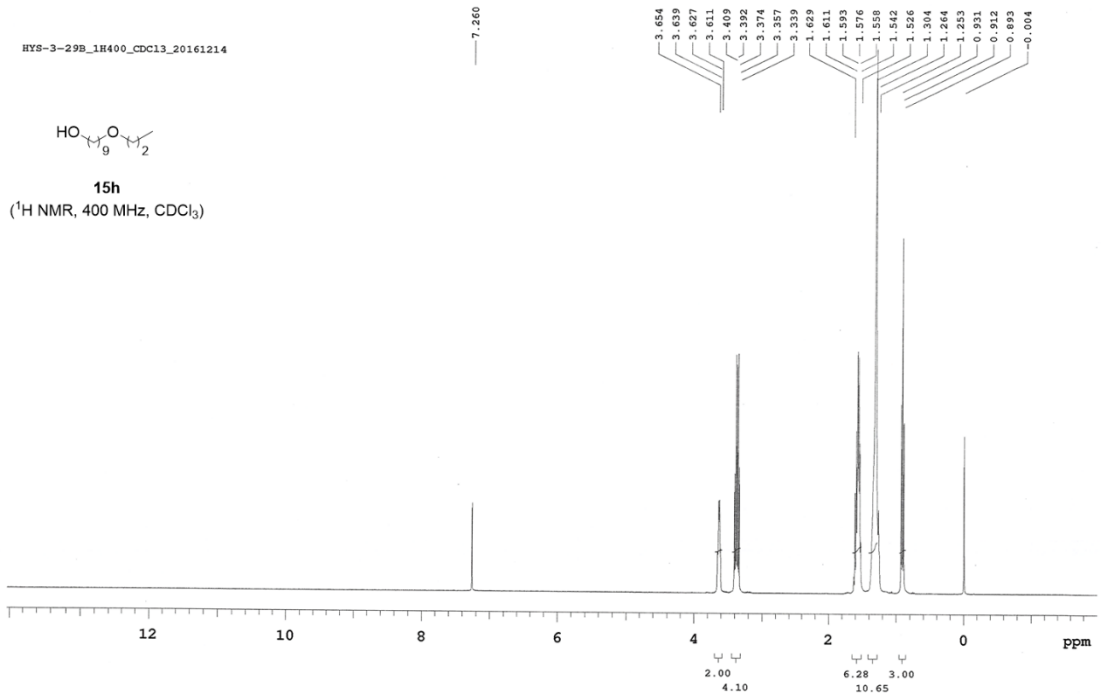

HYS-3-29B\_13C400\_CDCl3\_20161214

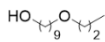

**15h**  
(<sup>13</sup>C NMR, 100 MHz, CDCl<sub>3</sub>)

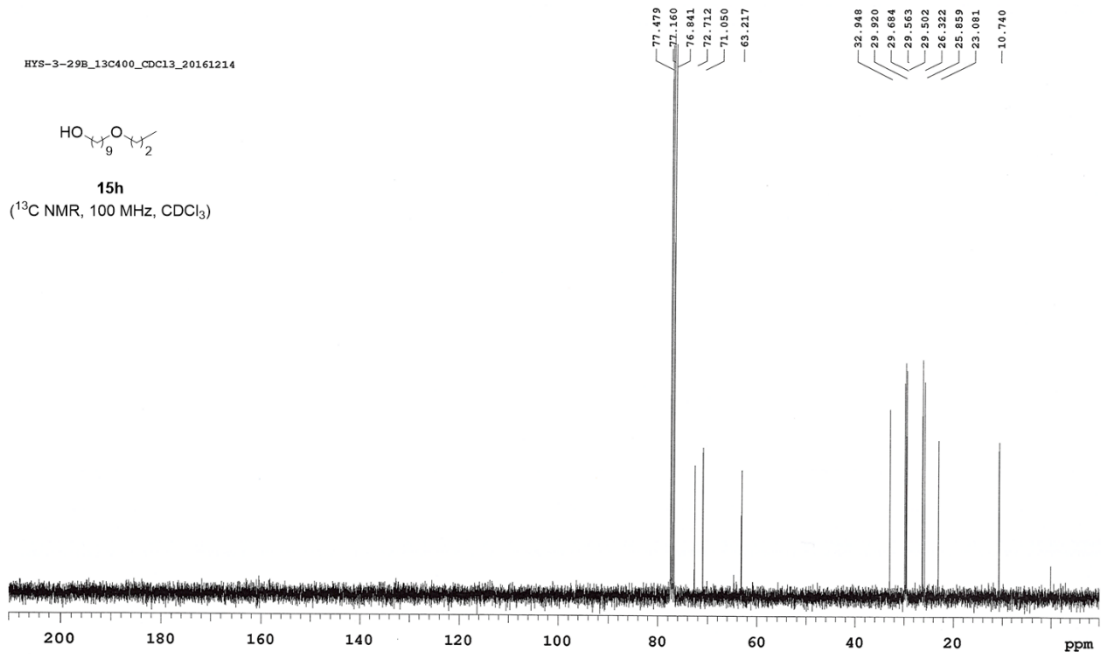

HYS-3-50A\_1H400\_CDCl3\_20170116

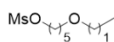

**16a**  
(<sup>1</sup>H NMR, 400 MHz, CDCl<sub>3</sub>)

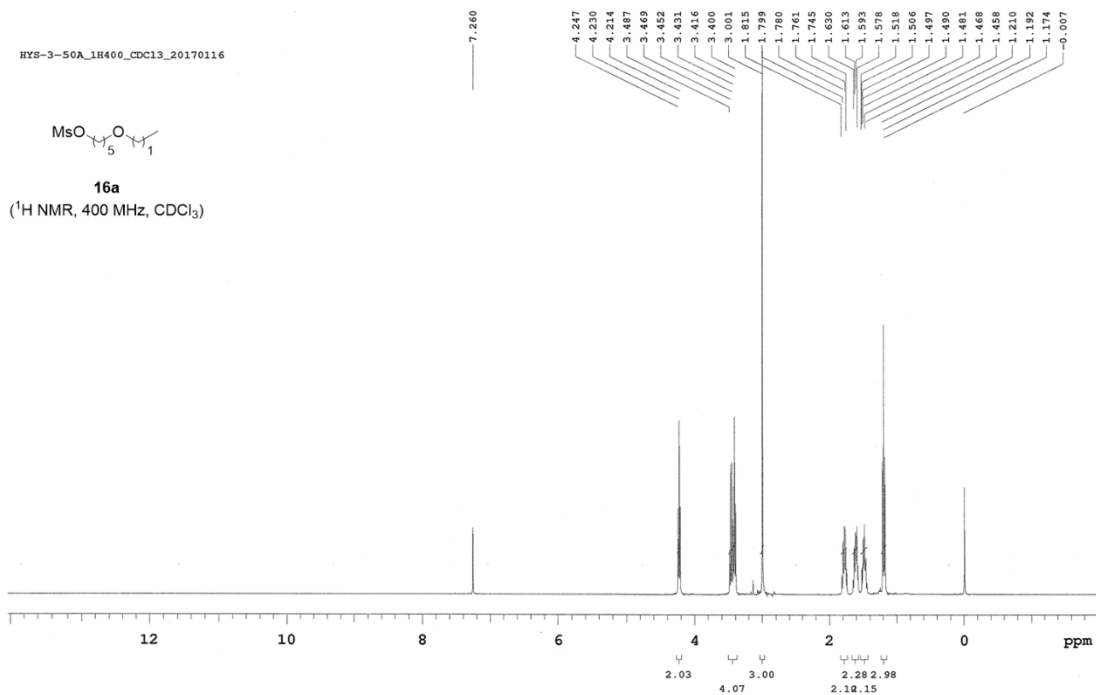

HYS-3-50A\_13C400\_CDCl3\_20170116

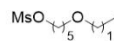

**16a**  
(<sup>13</sup>C NMR, 100 MHz, CDCl<sub>3</sub>)

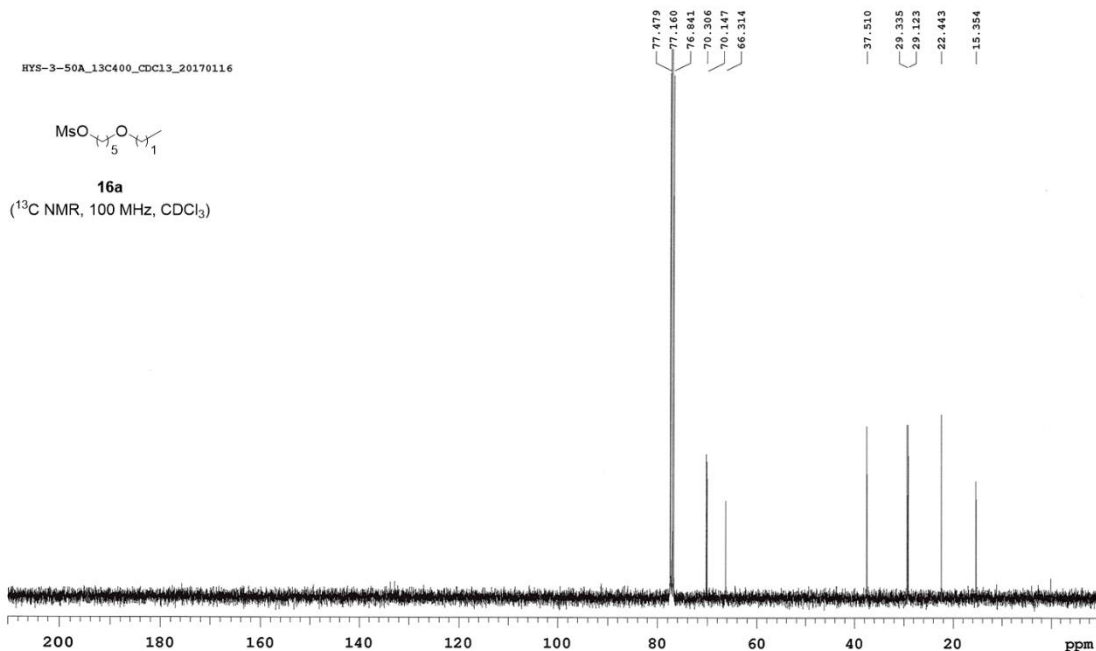

HYS-3-50B\_1H400\_CDCl3\_20170116

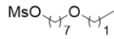

**16b**  
(<sup>1</sup>H NMR, 400 MHz, CDCl<sub>3</sub>)

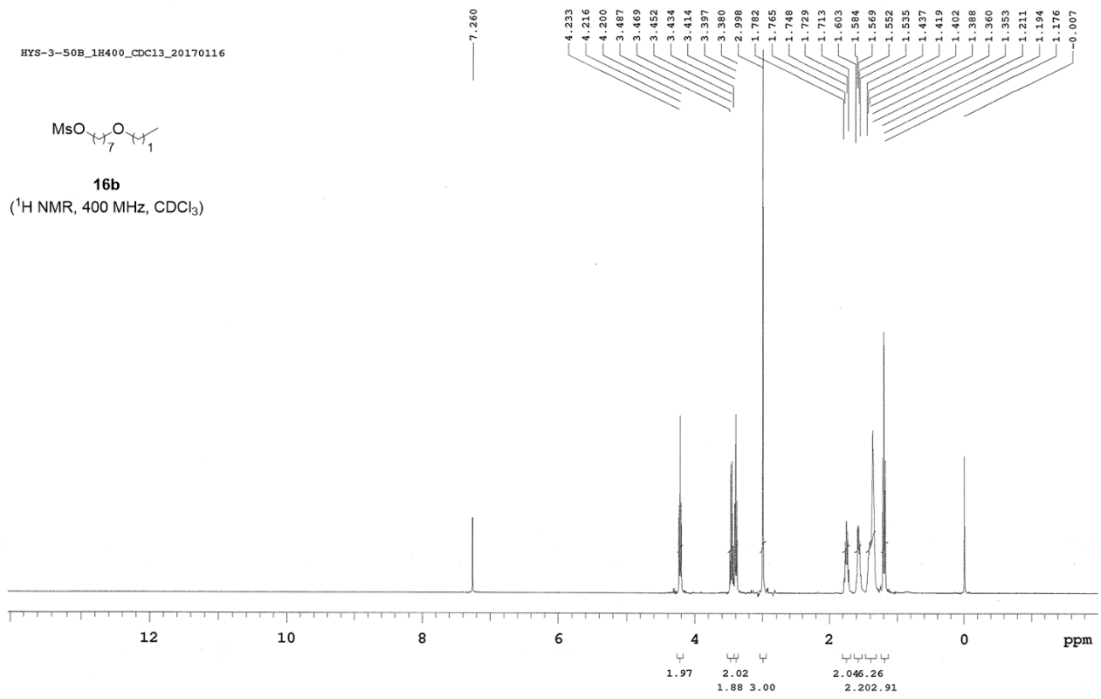

HYS-3-50B\_13C400\_CDCl3\_20170116

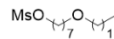

**16b**  
(<sup>13</sup>C NMR, 100 MHz, CDCl<sub>3</sub>)

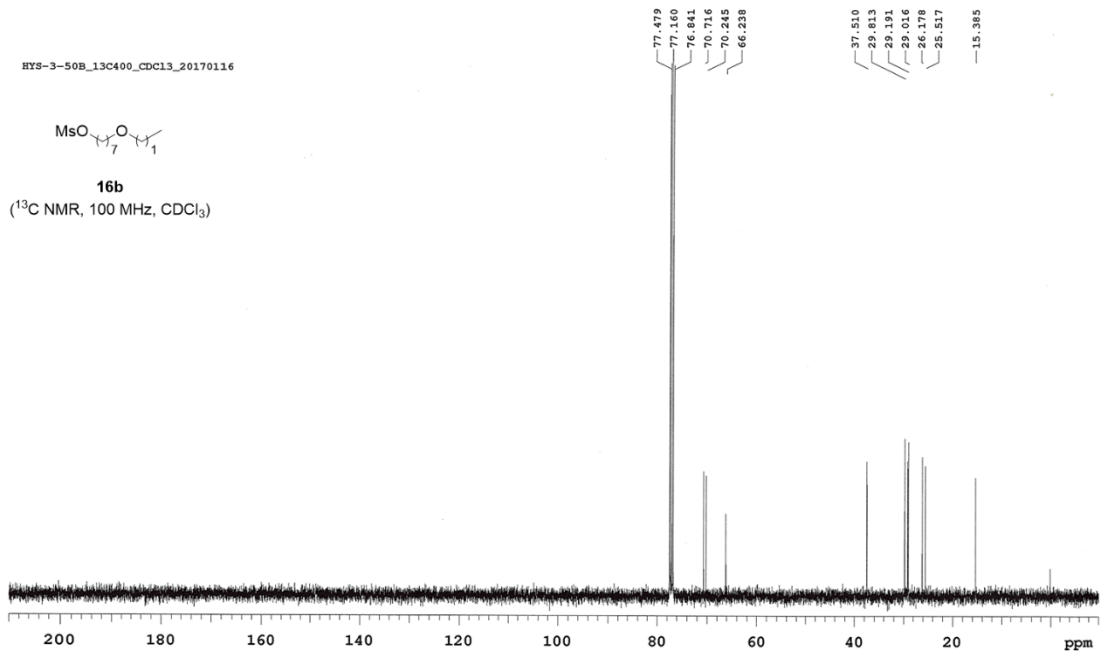

HYS-3-30A\_1H400\_CDCl3\_20161215

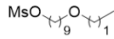

**16c**  
(<sup>1</sup>H NMR, 400 MHz, CDCl<sub>3</sub>)

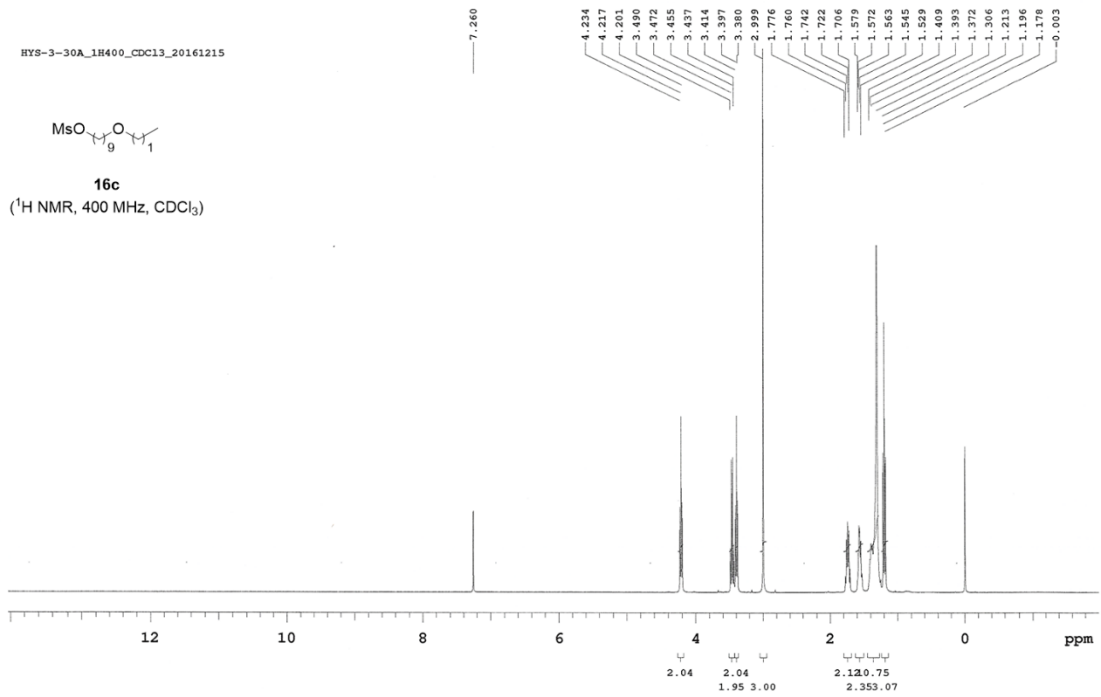

HYS-3-30A\_13C400\_CDCl3\_20161215

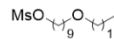

**16c**  
(<sup>13</sup>C NMR, 100 MHz, CDCl<sub>3</sub>)

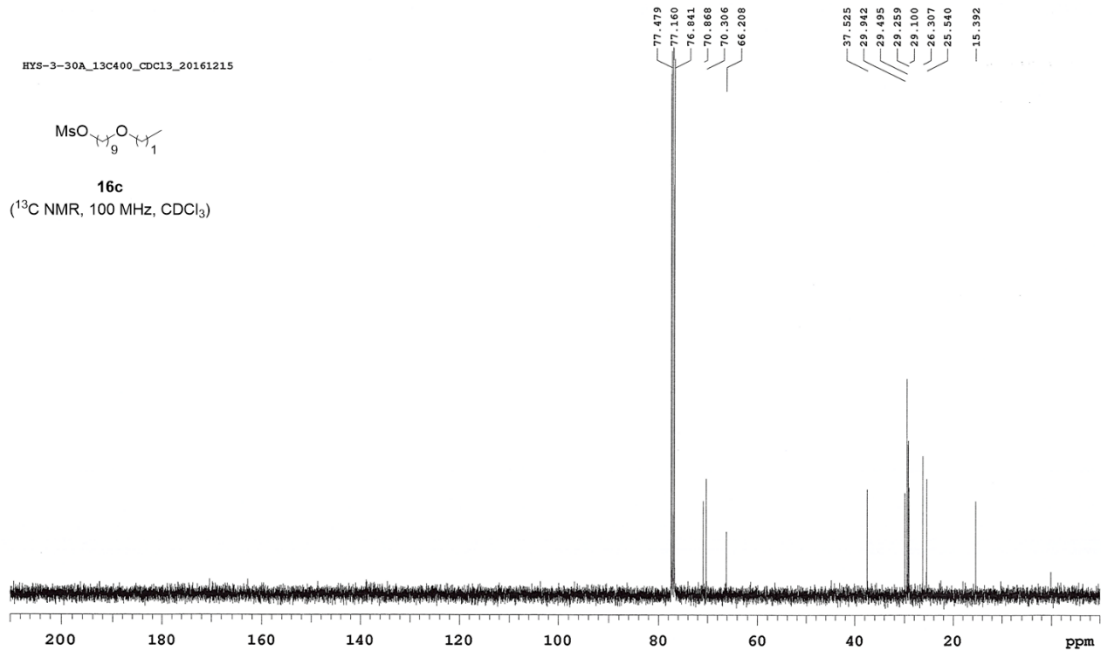



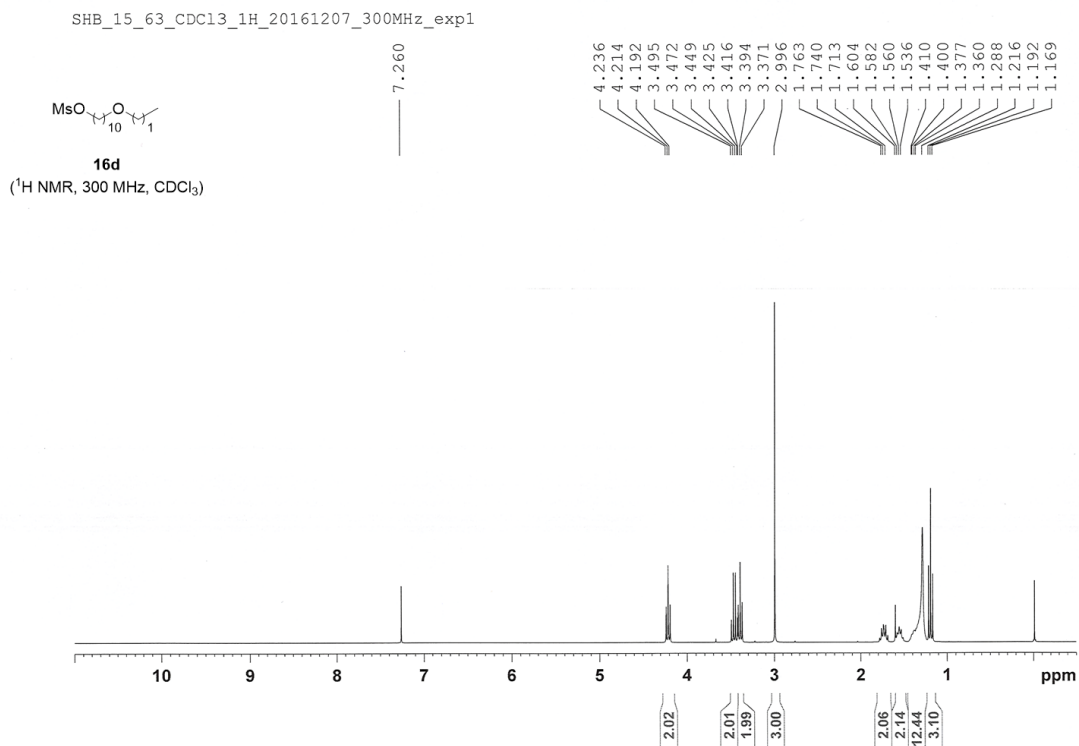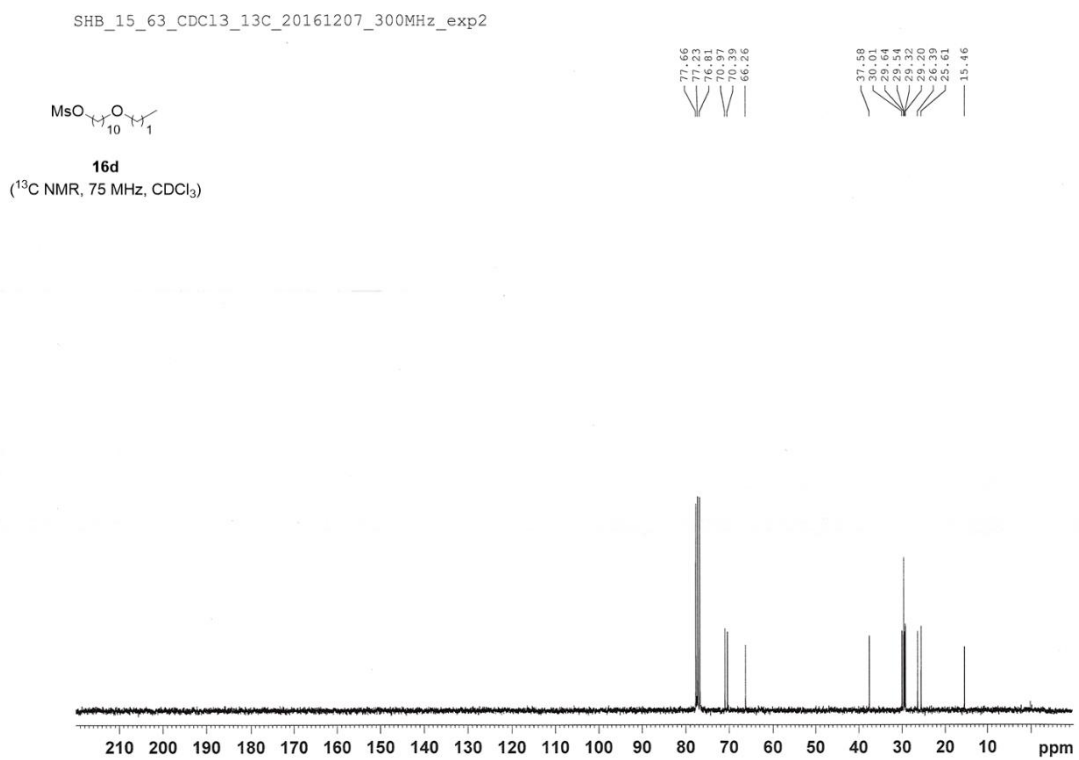

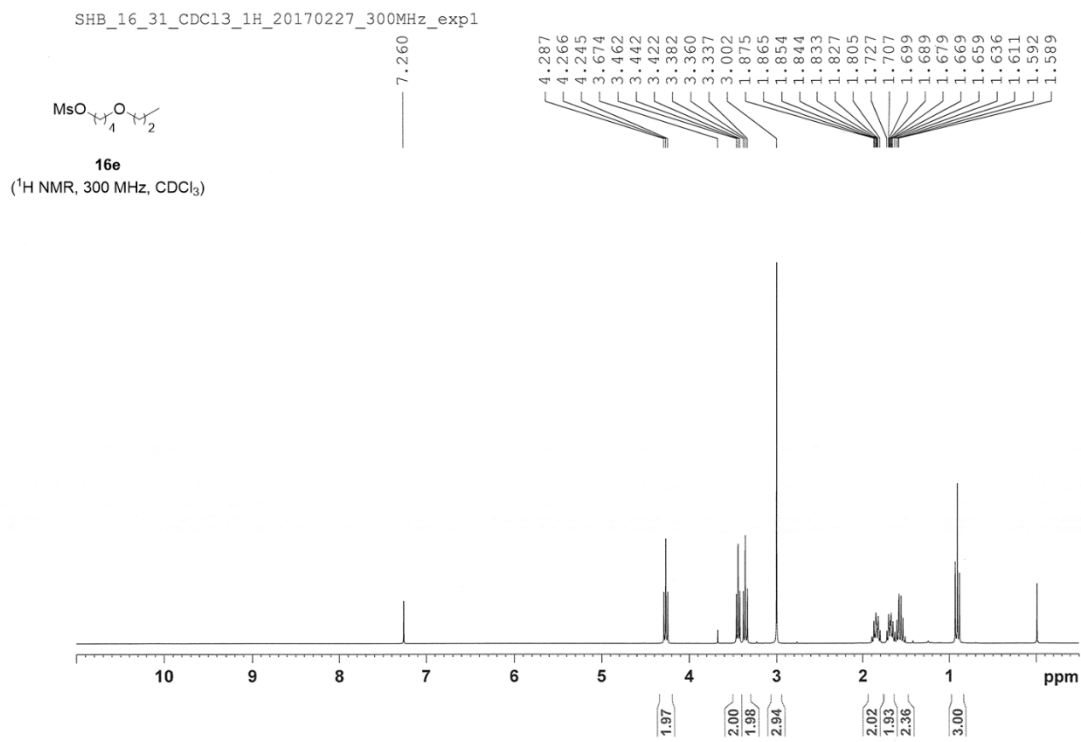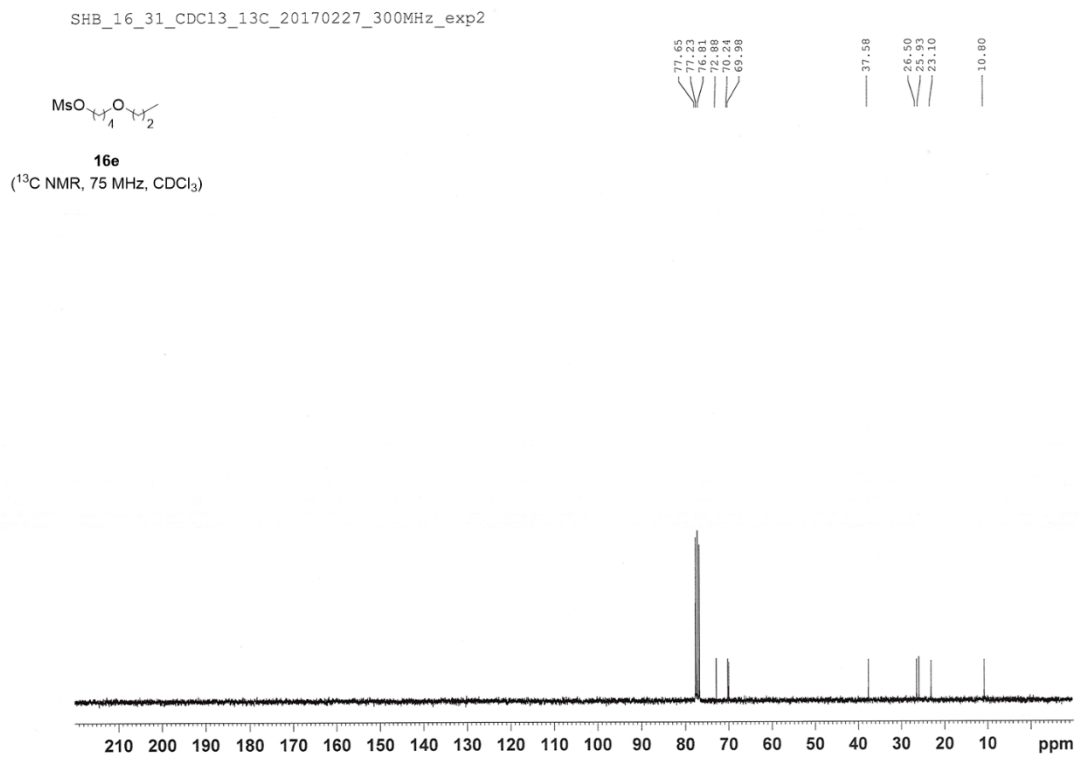

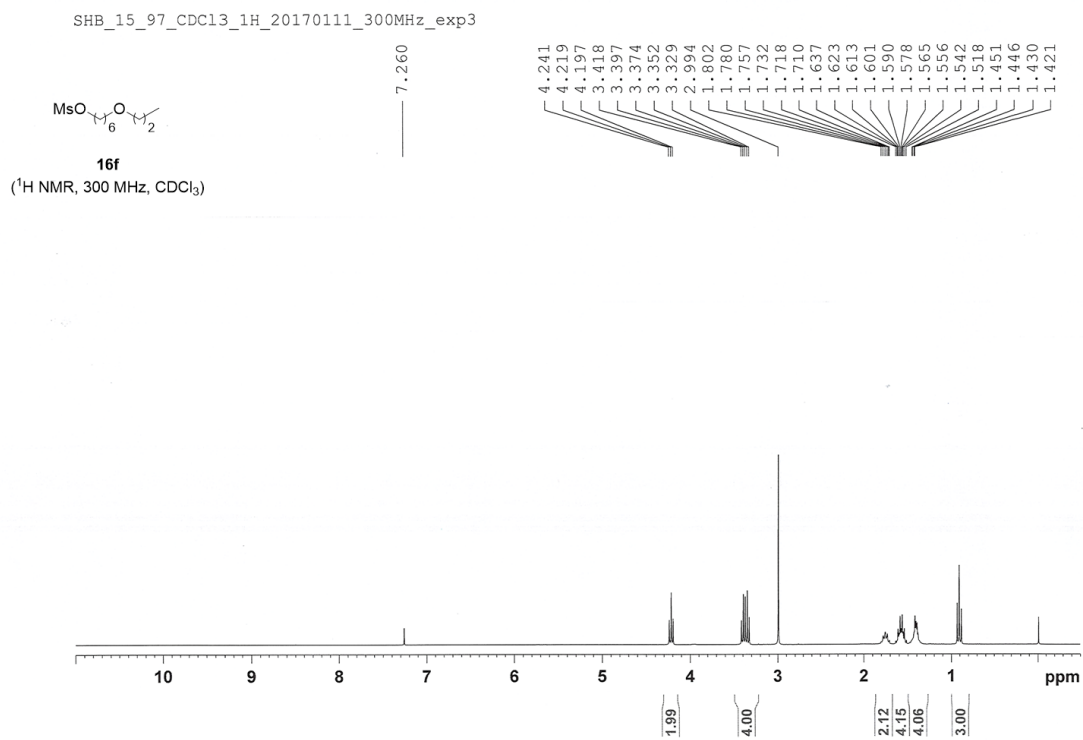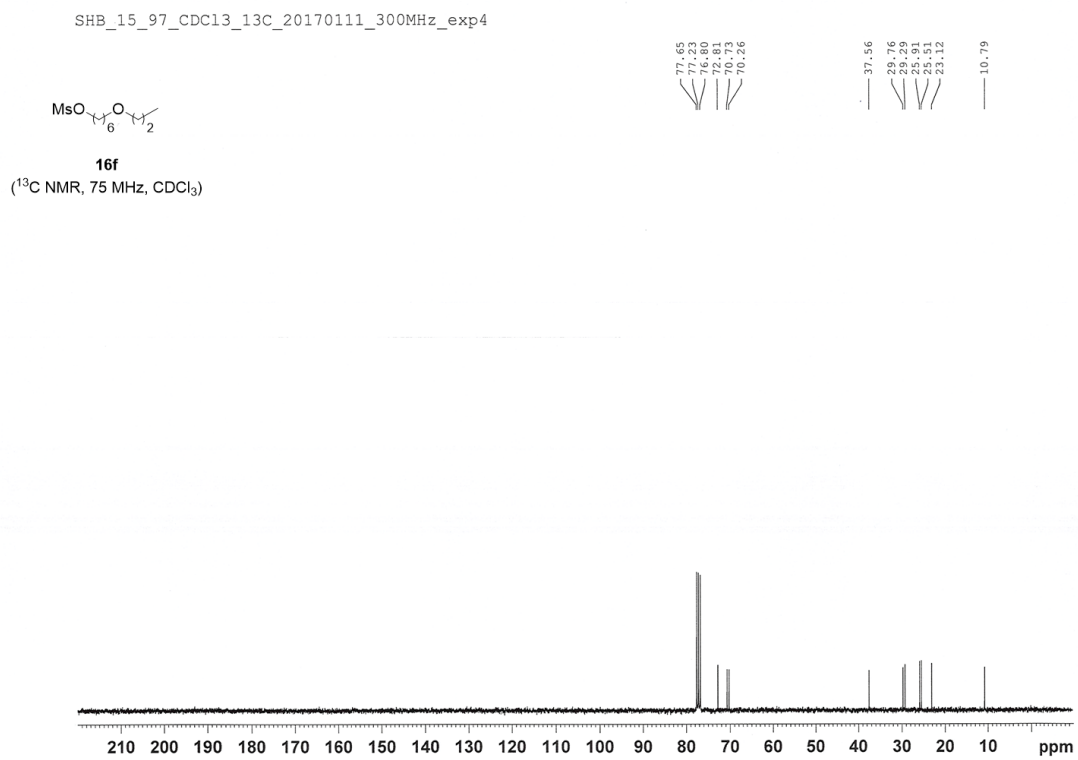

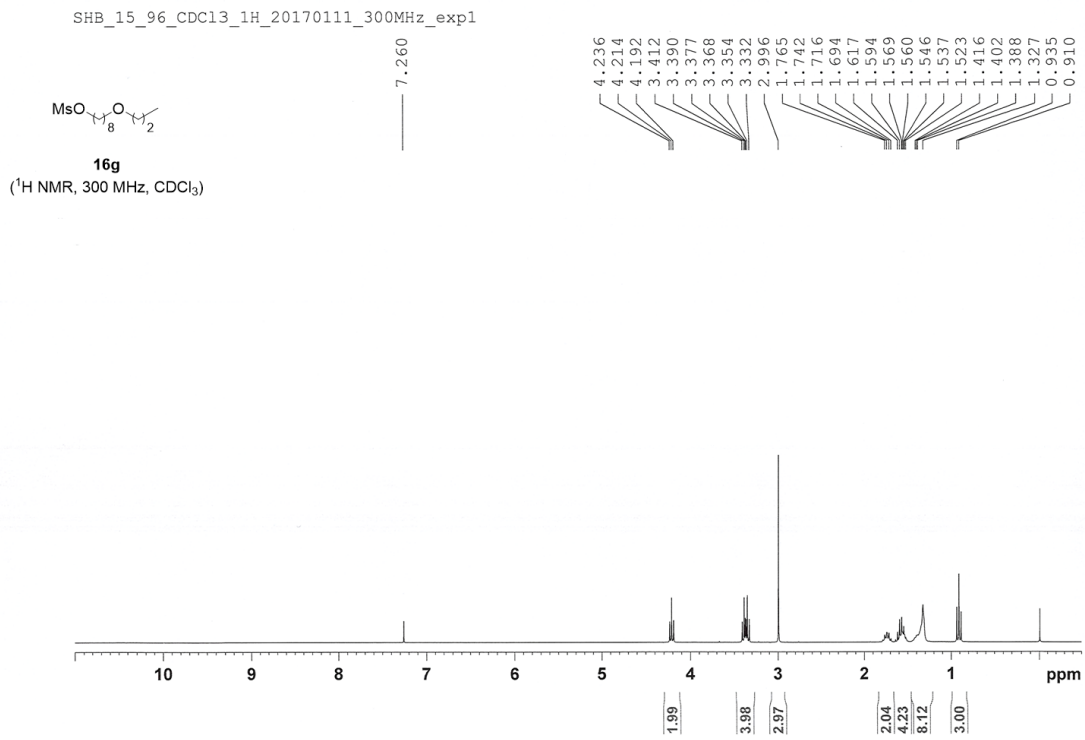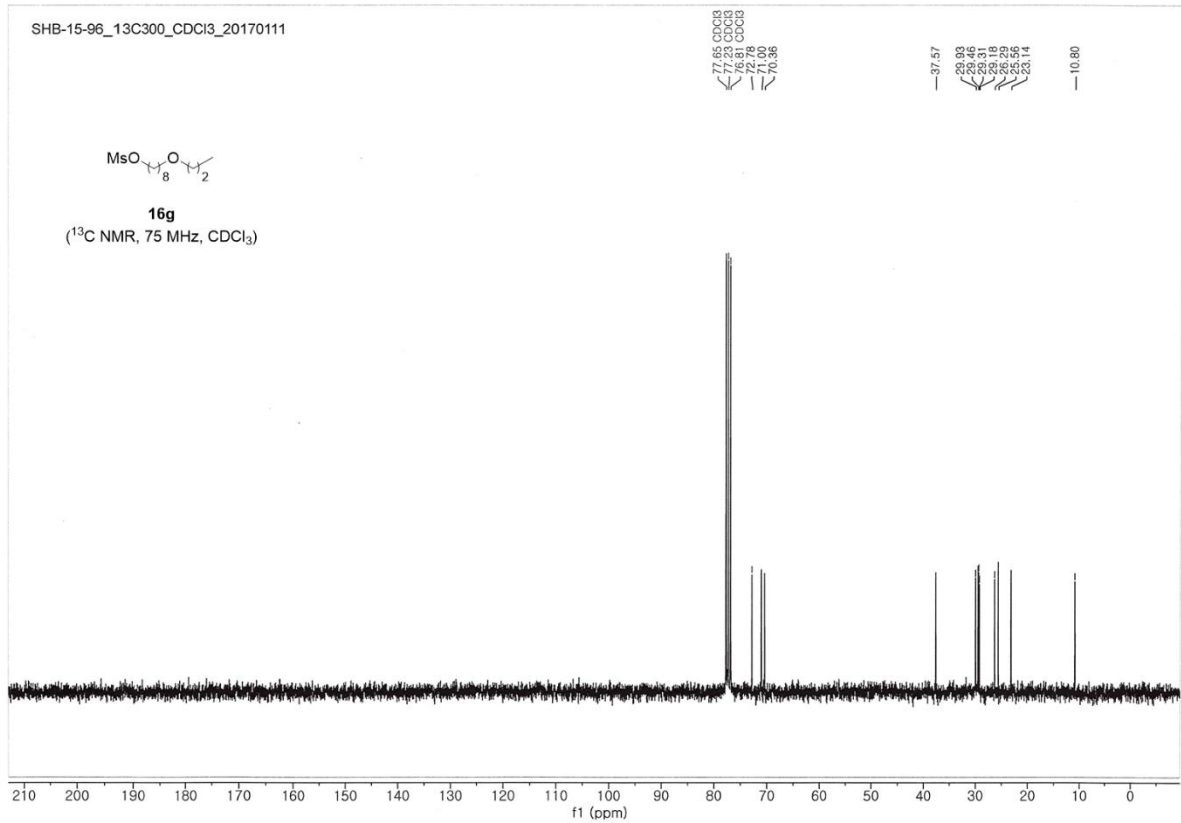

HYS-3-30B\_1H400\_CDCl3\_20161219

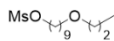

**16h**  
(<sup>1</sup>H NMR, 400 MHz, CDCl<sub>3</sub>)

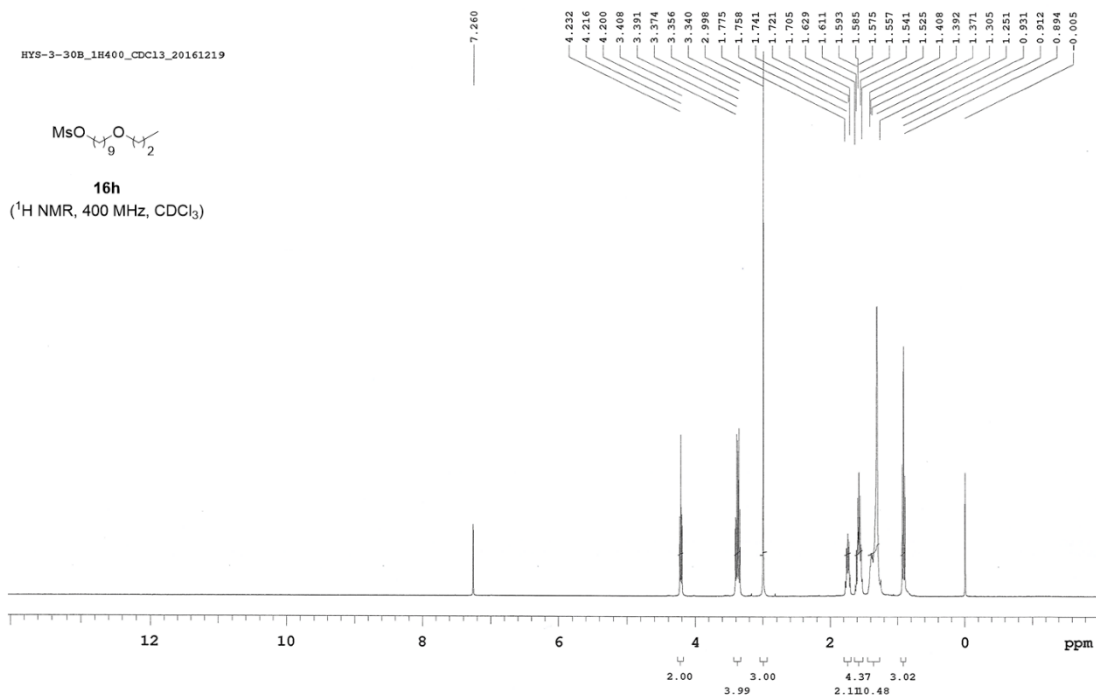

HYS-3-30B\_13C400\_CDCl3\_20161219

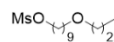

**16h**  
(<sup>13</sup>C NMR, 100 MHz, CDCl<sub>3</sub>)

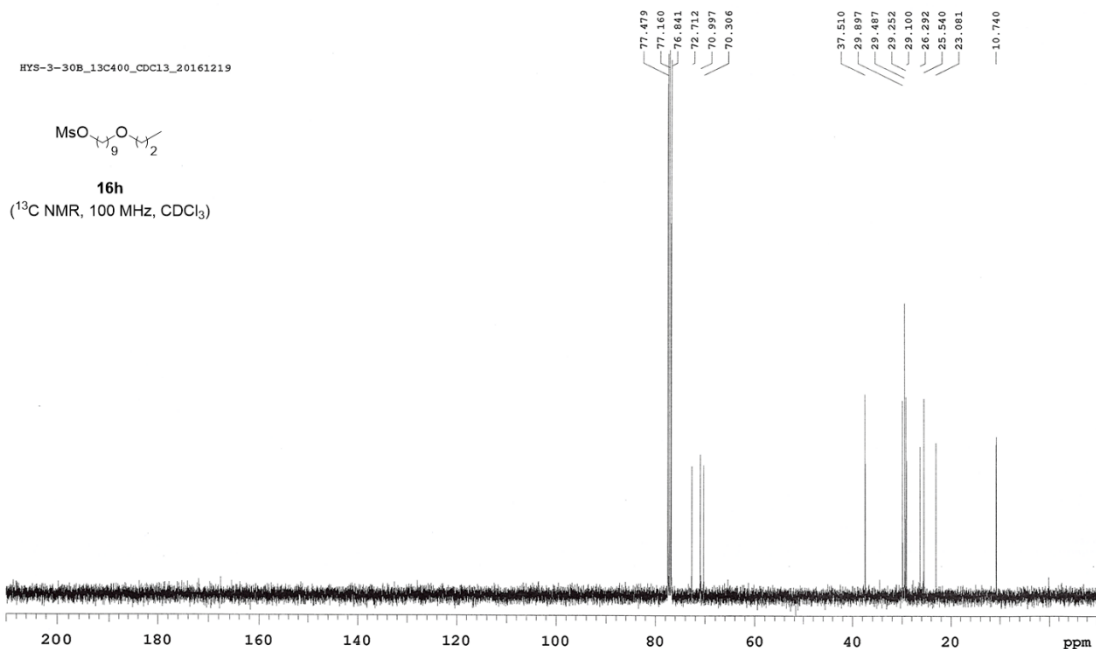

HYS-3-54\_1H400\_CDCl3\_20170126

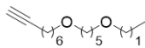

**18a**

(<sup>1</sup>H NMR, 400 MHz, CDCl<sub>3</sub>)

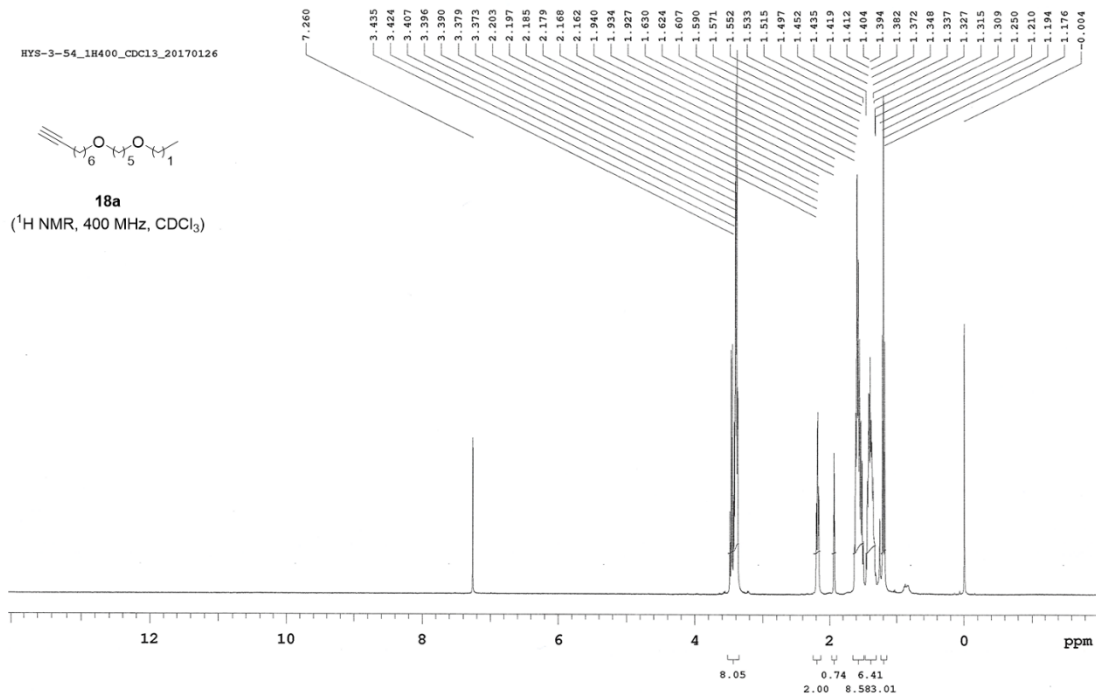

HYS-3-54\_13C400\_CDCl3\_20170126

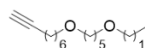

**18a**

(<sup>13</sup>C NMR, 100 MHz, CDCl<sub>3</sub>)

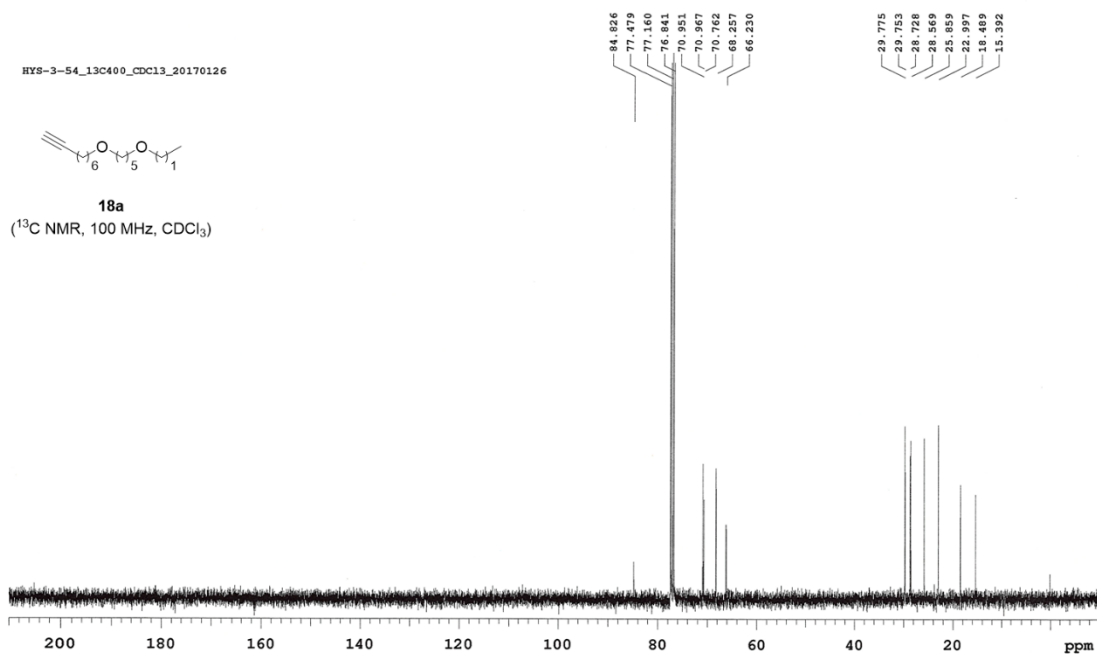

HYS-3-53\_1H400\_CDCl3\_20170123

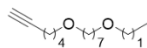

**18b**  
(<sup>1</sup>H NMR, 400 MHz, CDCl<sub>3</sub>)

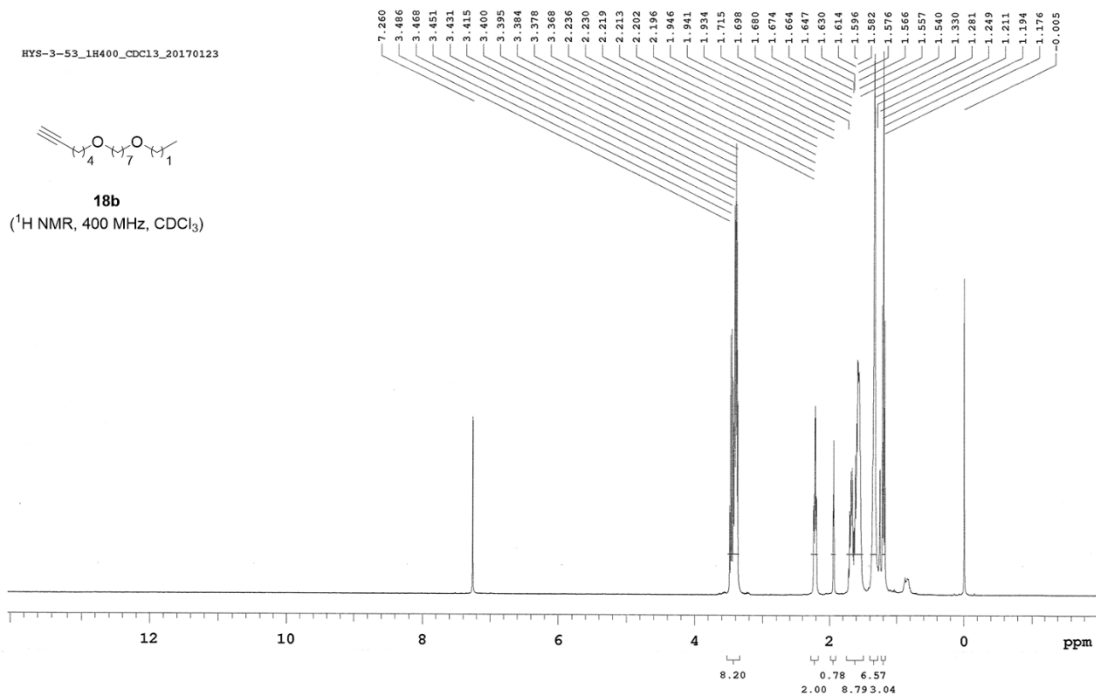

HYS-3-53\_13C400\_CDCl3\_20170123

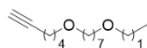

**18b**  
(<sup>13</sup>C NMR, 100 MHz, CDCl<sub>3</sub>)

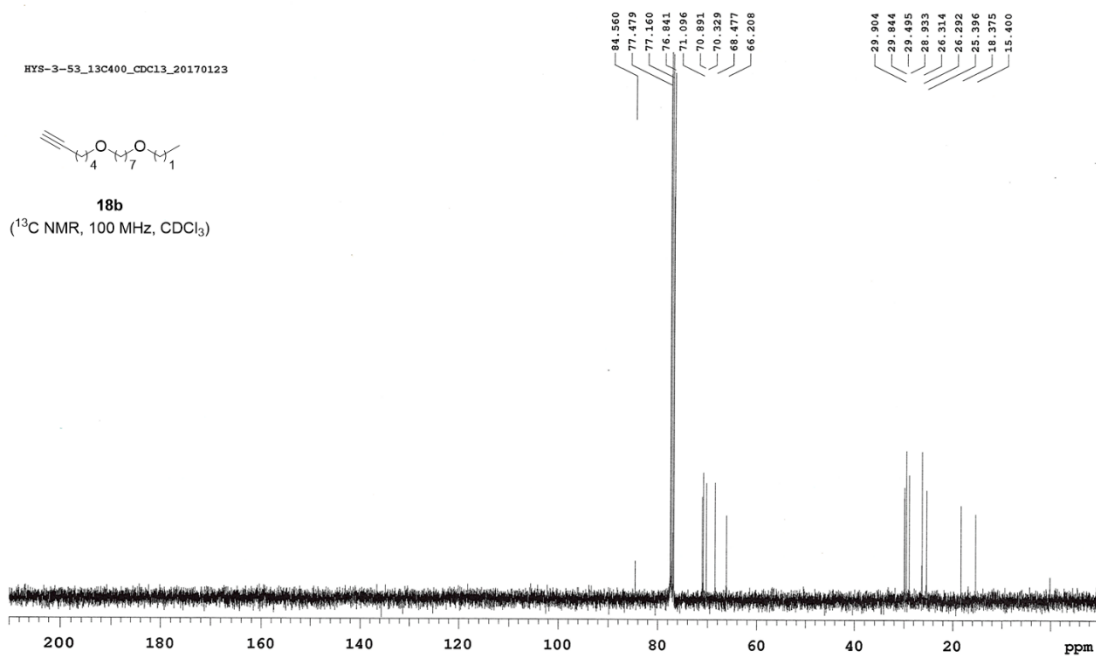

HYS-6-65\_1H500\_CDCl3\_20181018  
Sample Name:  
HYS-6-65\_1H500\_CDCl3\_20181018  
Data Collected on:  
Agilent-NMR.chem.com-vmrs500  
Archive directory:  
Sample directory:  
FidFile: PROTON  
Pulse Sequence: PROTON (s2pul)  
Solvent: cdcl3  
Data collected on: Oct 18 2018

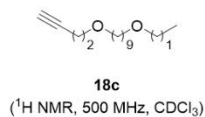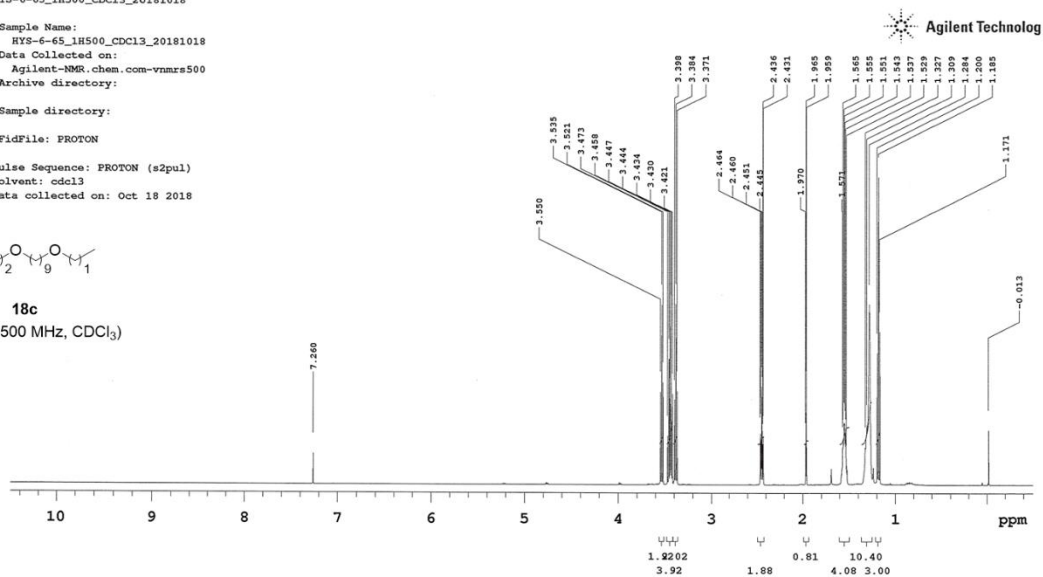

HYS-6-65\_13C500\_CDCl3\_20181018  
Sample Name:  
HYS-6-65\_13C500\_CDCl3\_20181018  
Data Collected on:  
Agilent-NMR.chem.com-vmrs500  
Archive directory:  
Sample directory:  
FidFile: CARBON  
Pulse Sequence: CARBON (s2pul)  
Solvent: cdcl3  
Data collected on: Oct 18 2018

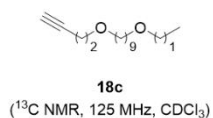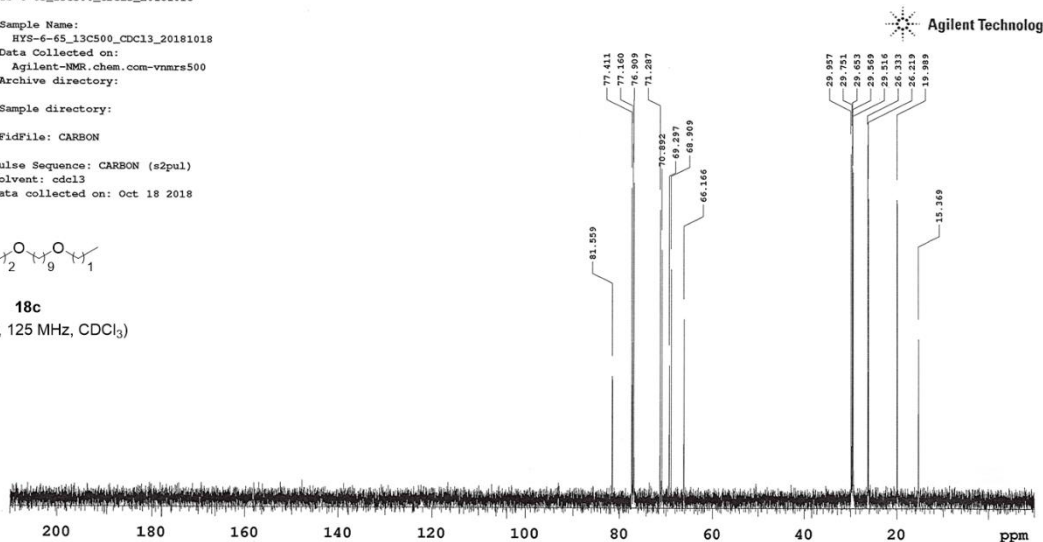



SHB\_15\_65&66\_CDC13\_1H\_20161209\_300MHz\_exp1

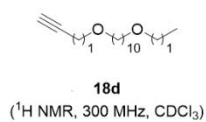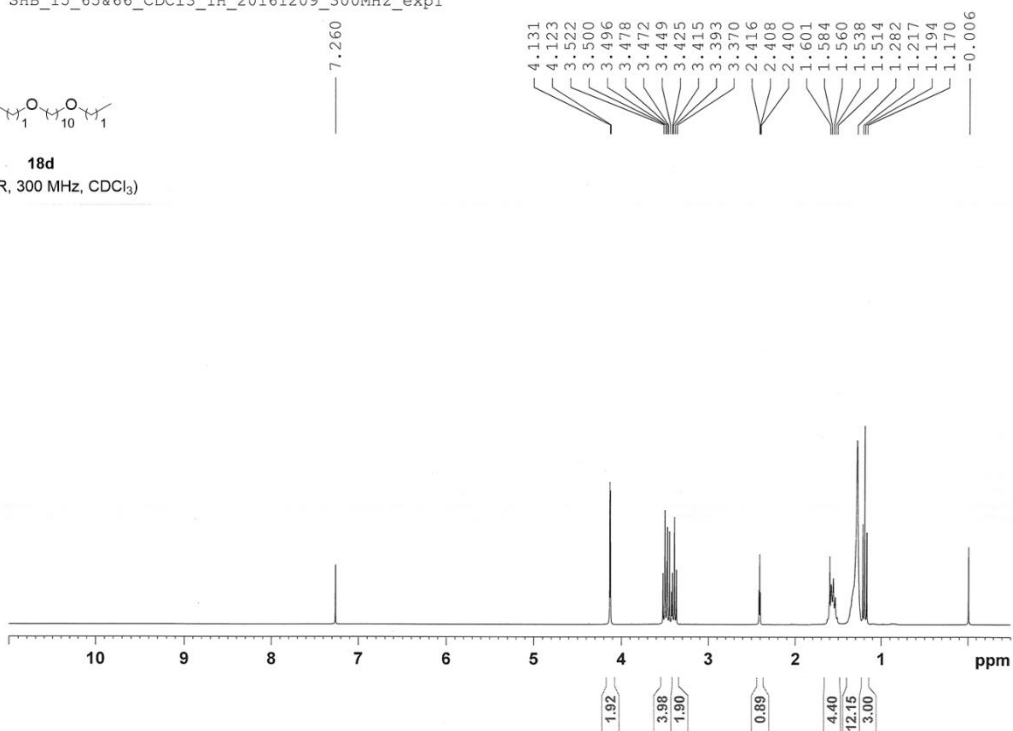

SHB\_15\_65&66\_CDC13\_13C\_20161209\_300MHz\_exp2

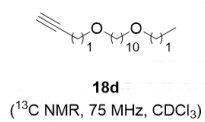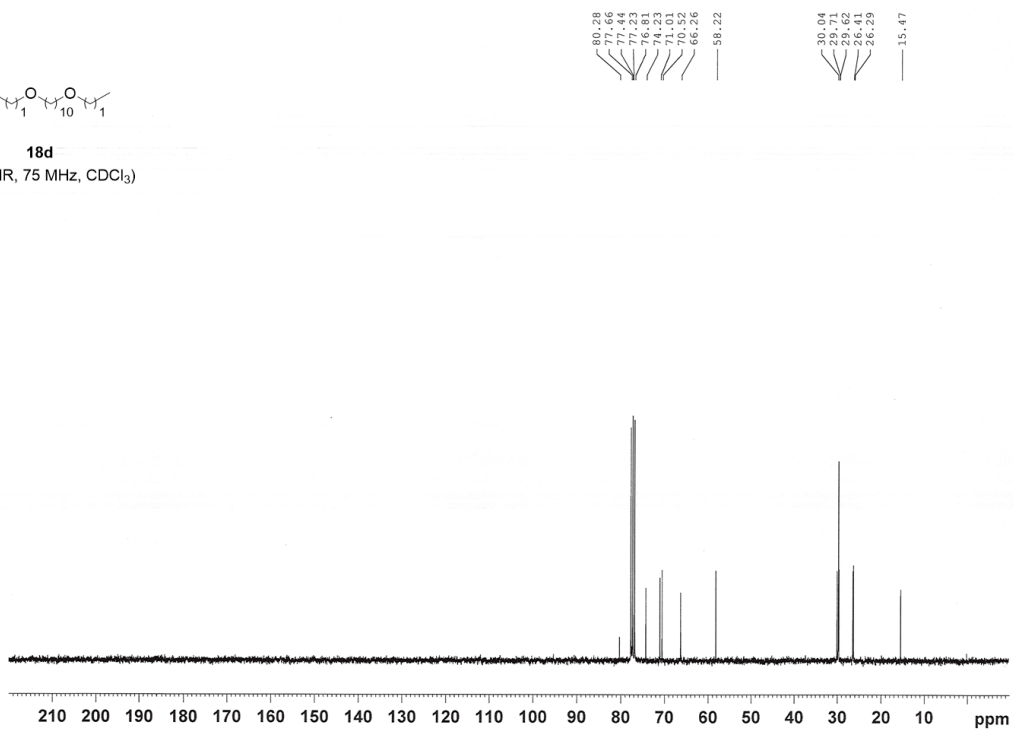

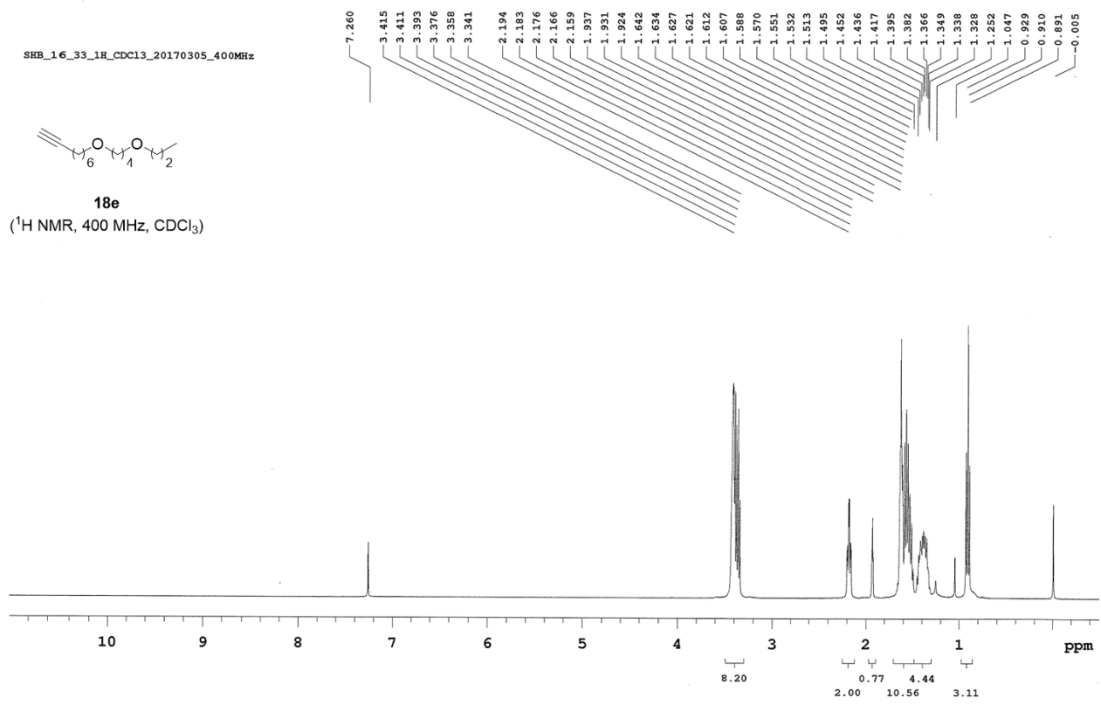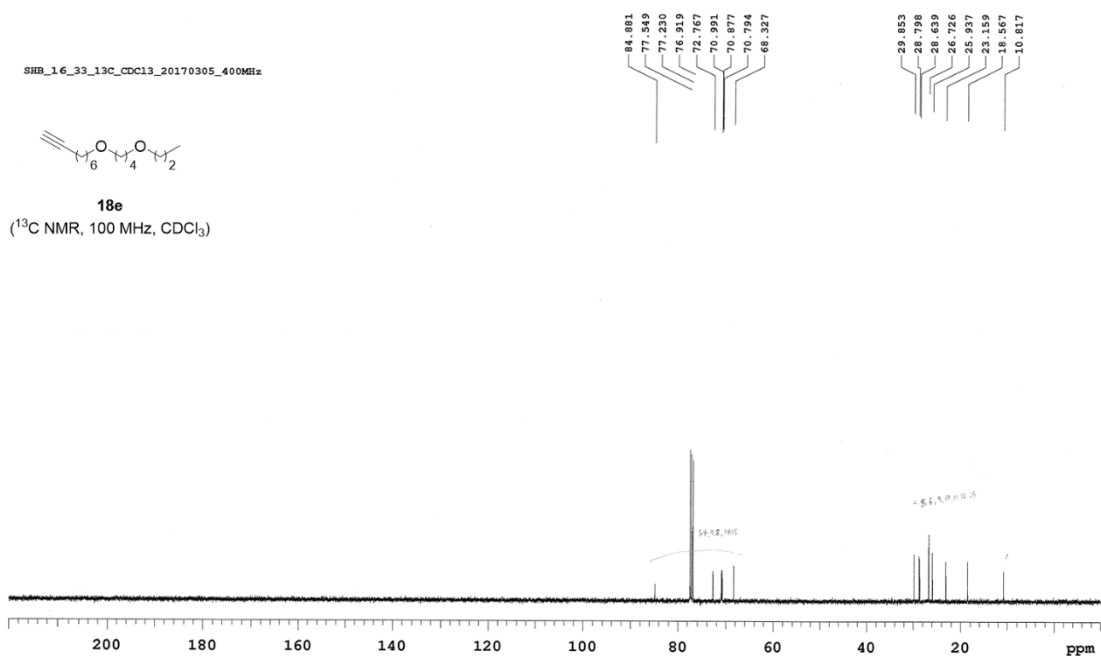

SHB\_16\_4&5\_CDCl3\_1H\_20170119\_300MHz\_exp3

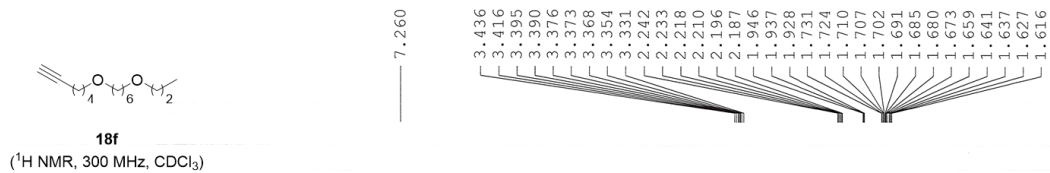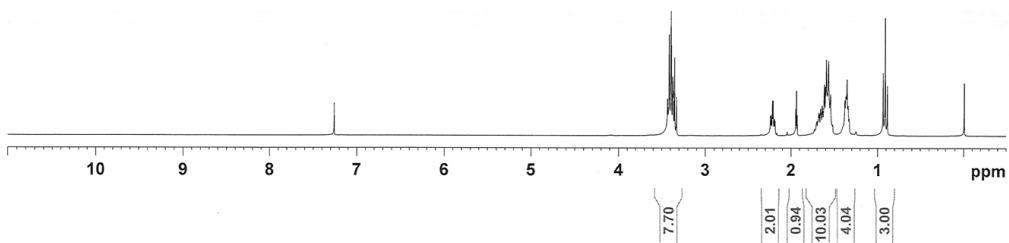

SHB\_16\_4&5\_CDCl3\_13C\_20170119\_300MHz\_exp4

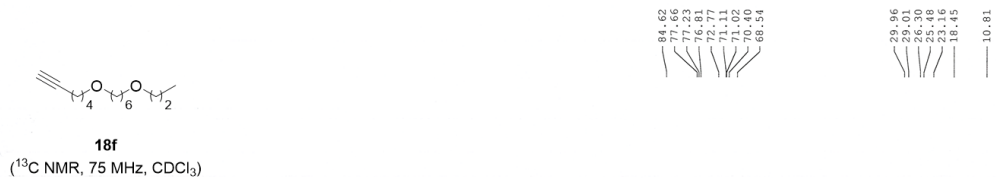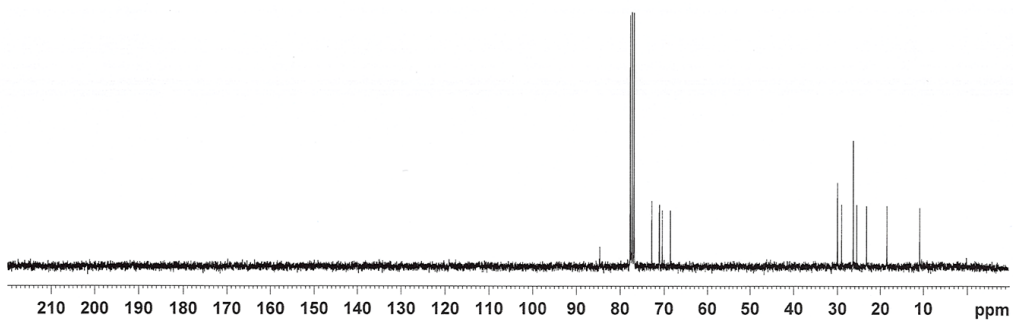

HYS-6-66\_1H500\_CDCl3\_20181019  
 Sample Name:  
 HYS-6-66\_1H500\_CDCl3\_20181019  
 Data Collected on:  
 Agilent-NMR.chem.com-vmrs500  
 Archive directory:  
 Sample directory:  
 FidFile: PROTON  
 Pulse Sequence: PROTON (s2pul)  
 Solvent: cdcl3  
 Data collected on: Oct 19 2018

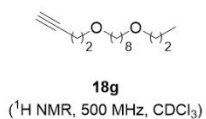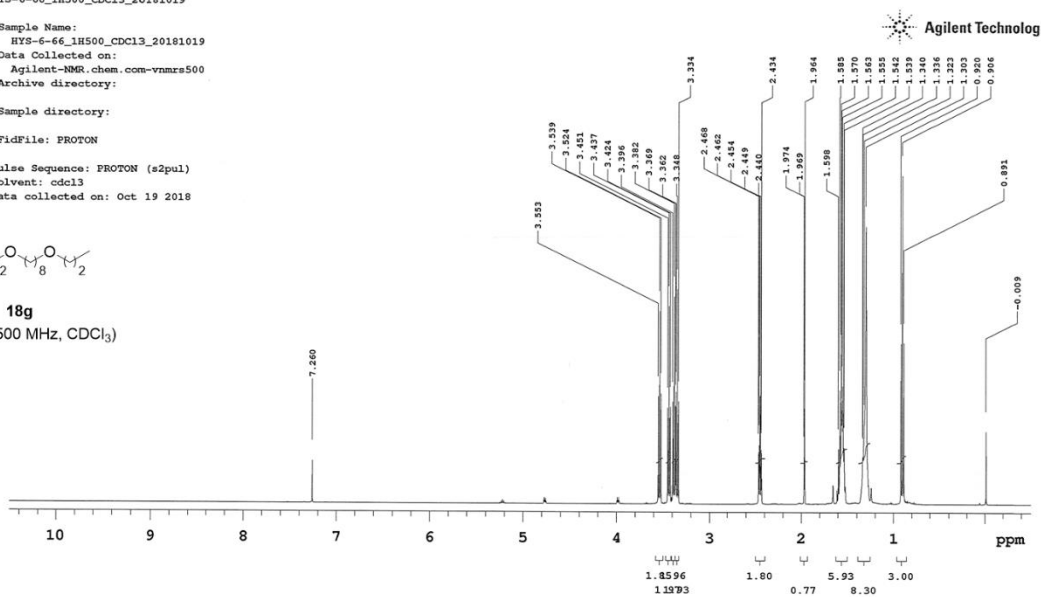

SHB\_15\_99&100\_CDCl3\_13C\_20170119\_300MHz\_exp2

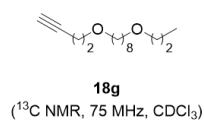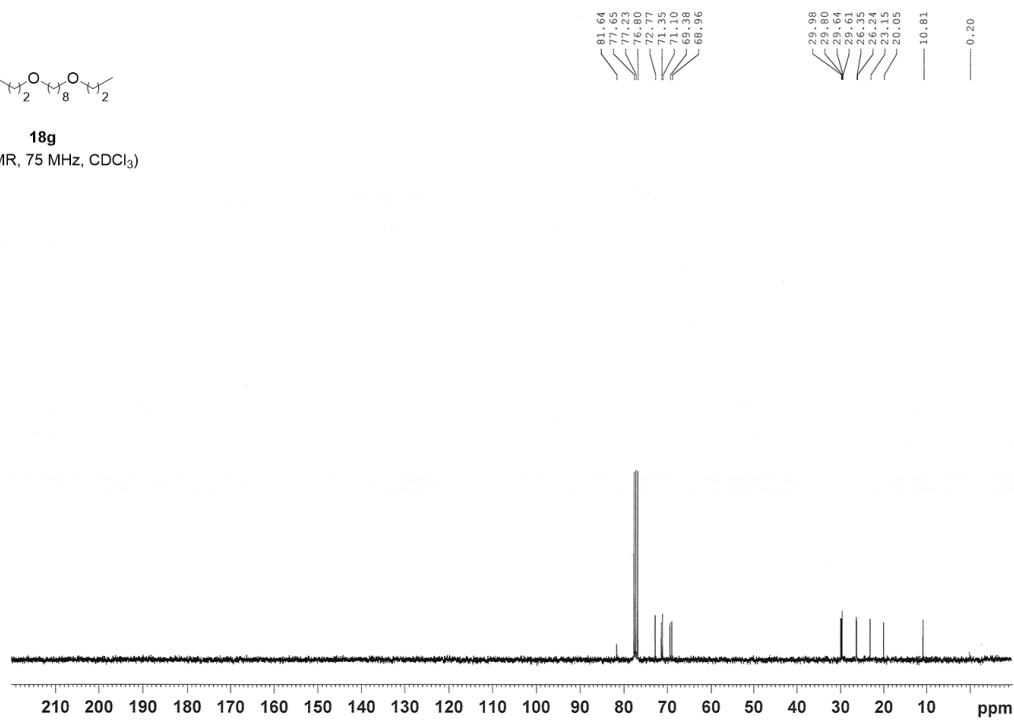

HYS-3-32\_1H400\_CDCl3\_20161217

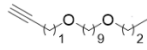

**18h**  
(<sup>1</sup>H NMR, 400 MHz, CDCl<sub>3</sub>)

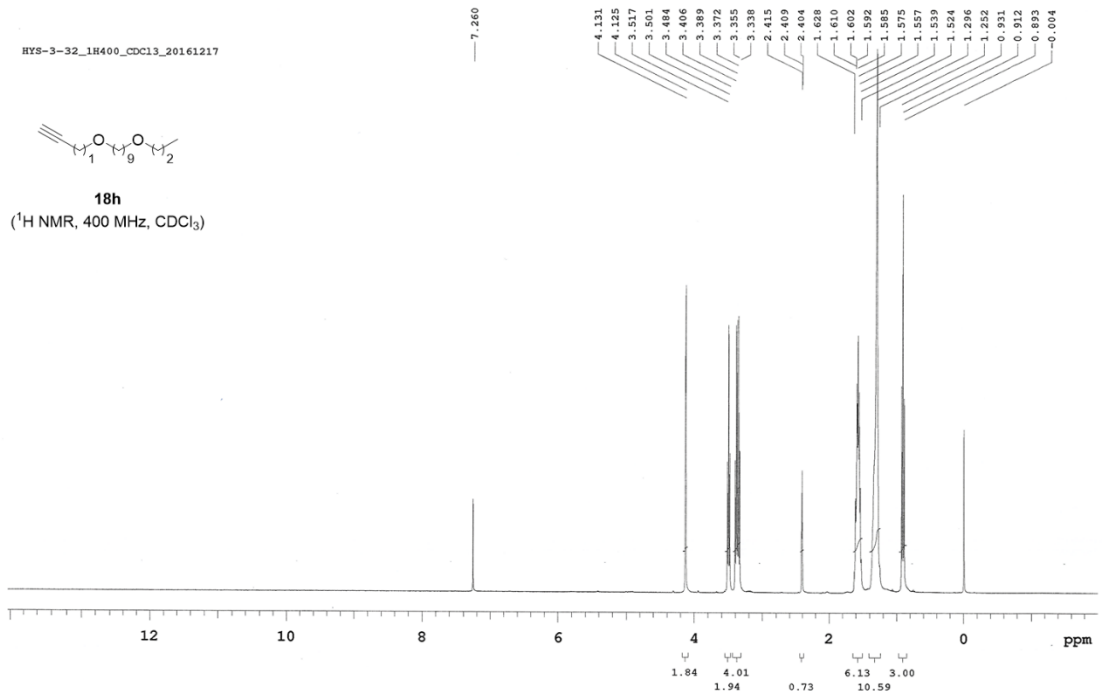

HYS-3-32\_13C400\_CDCl3\_20161217

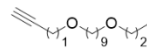

**18h**  
(<sup>13</sup>C NMR, 100 MHz, CDCl<sub>3</sub>)

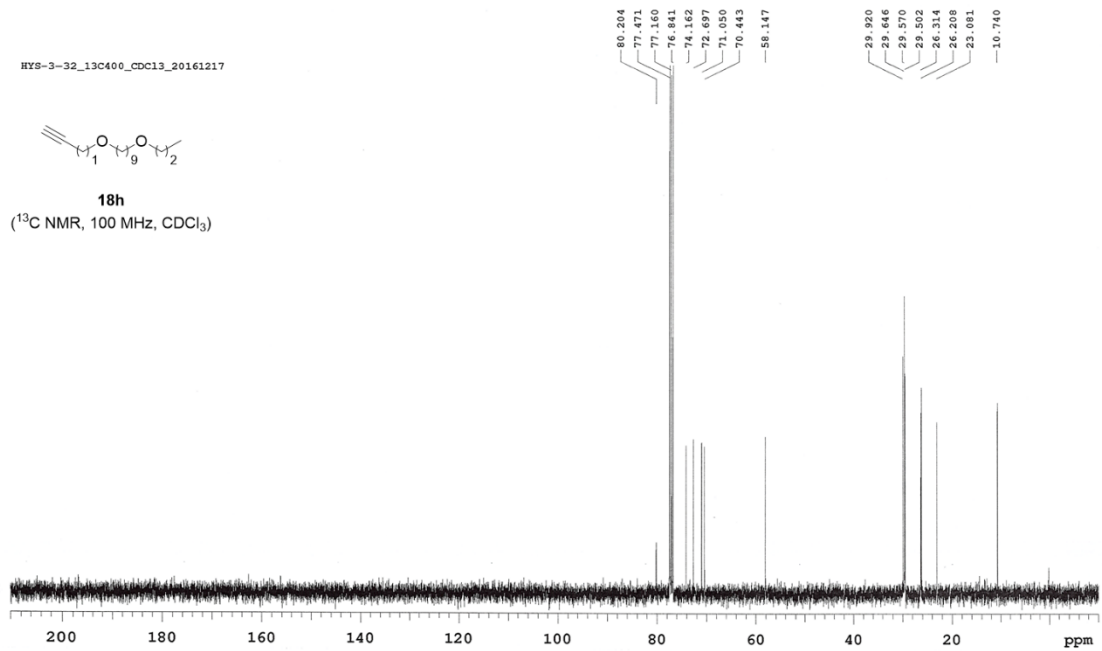

HYS-3-78\_1H400\_CD2Cl2\_20170329

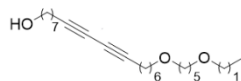

**19a**

(<sup>1</sup>H NMR, 400 MHz, CD<sub>2</sub>Cl<sub>2</sub>)

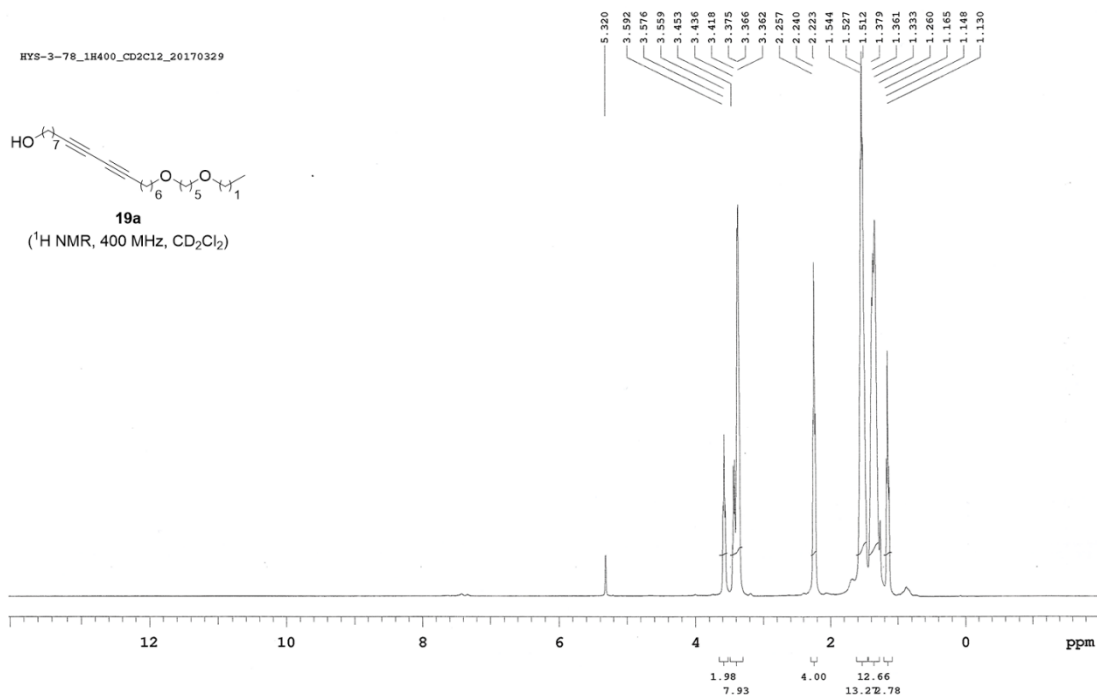

HYS-3-78\_13C400\_CD2Cl2\_20170329

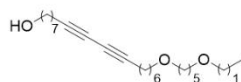

**19a**

(<sup>13</sup>C NMR, 100 MHz, CD<sub>2</sub>Cl<sub>2</sub>)

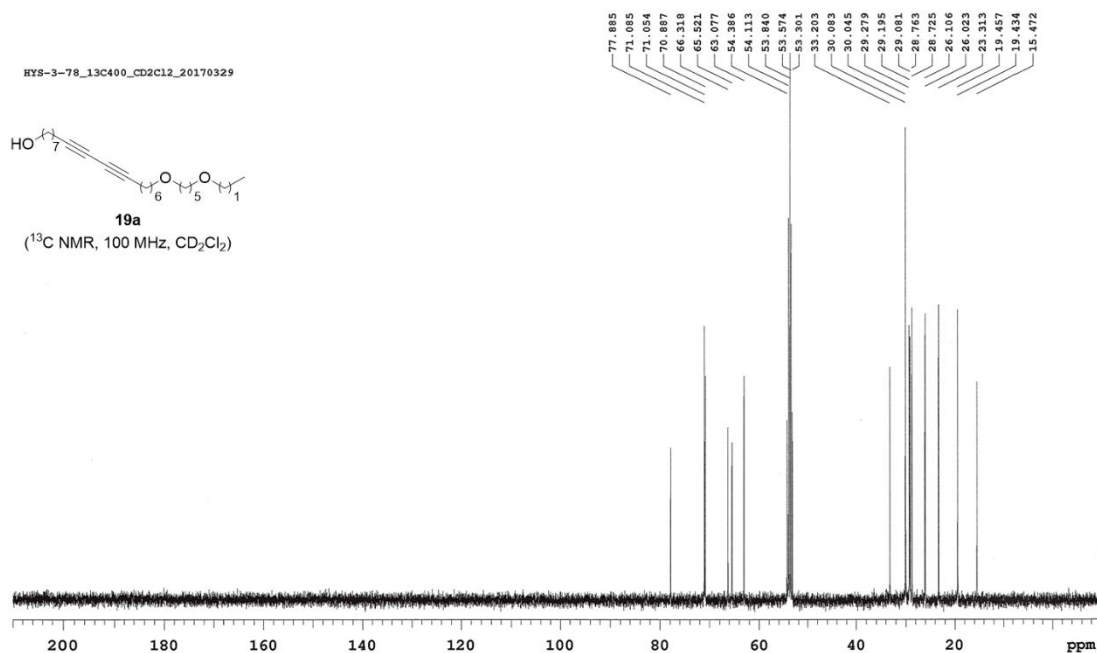

HYS-3-56\_1H400\_CD2Cl2\_20170202

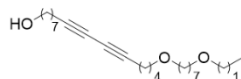

**19b**

(<sup>1</sup>H NMR, 400 MHz, CD<sub>2</sub>Cl<sub>2</sub>)

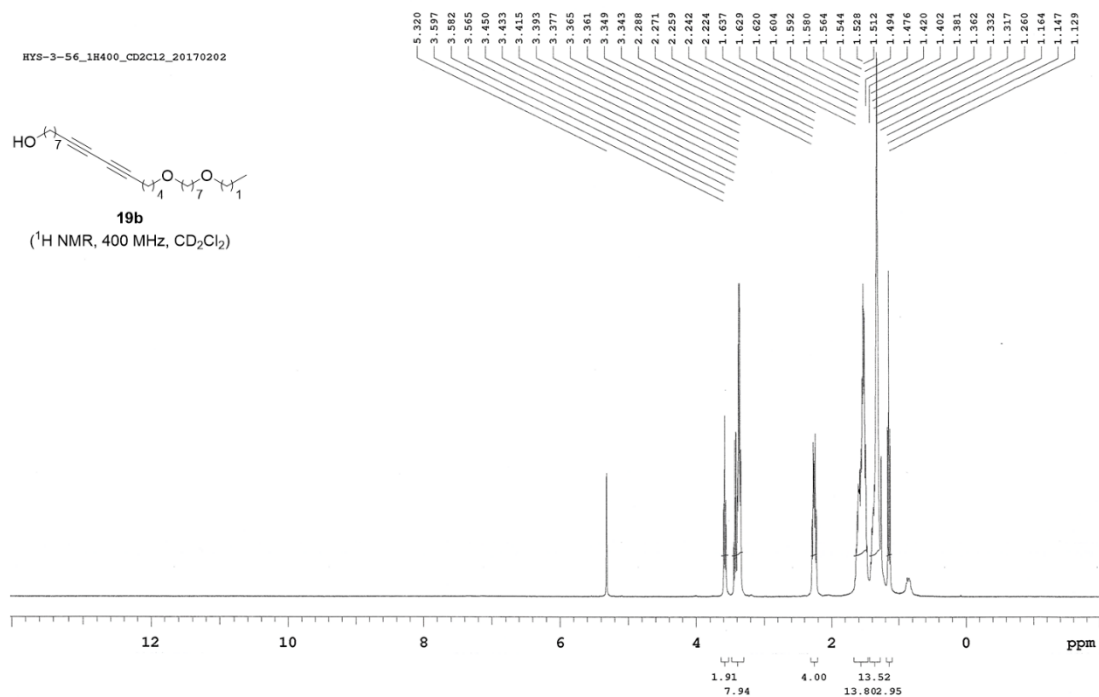

HYS-3-56\_13C400\_CD2Cl2\_20170202

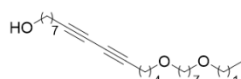

**19b**

(<sup>13</sup>C NMR, 100 MHz, CD<sub>2</sub>Cl<sub>2</sub>)

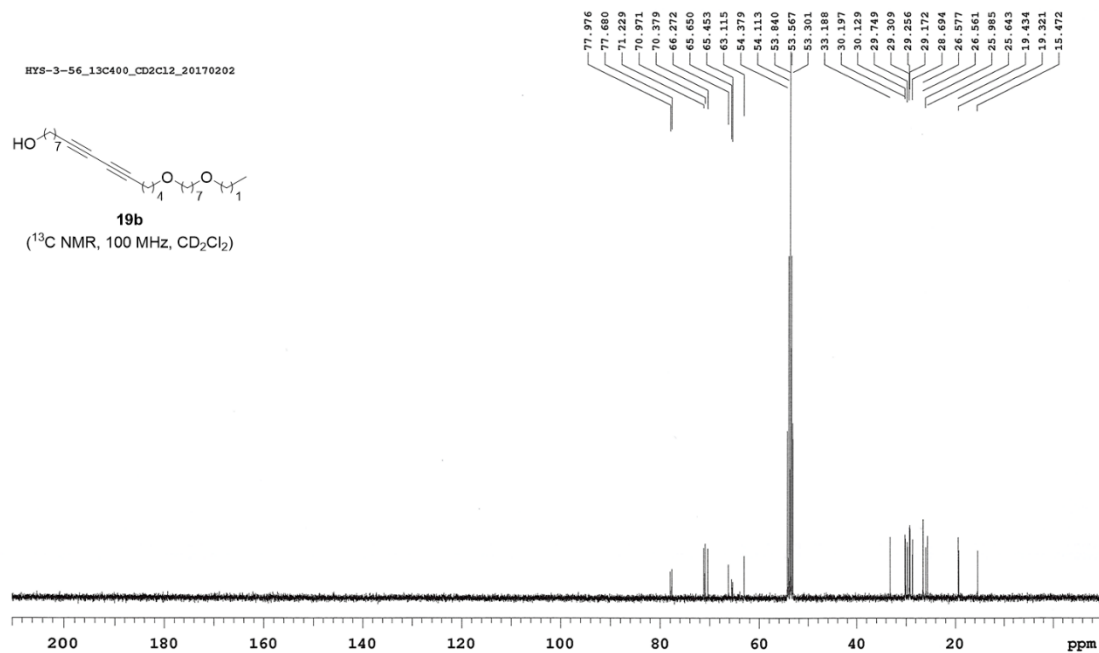

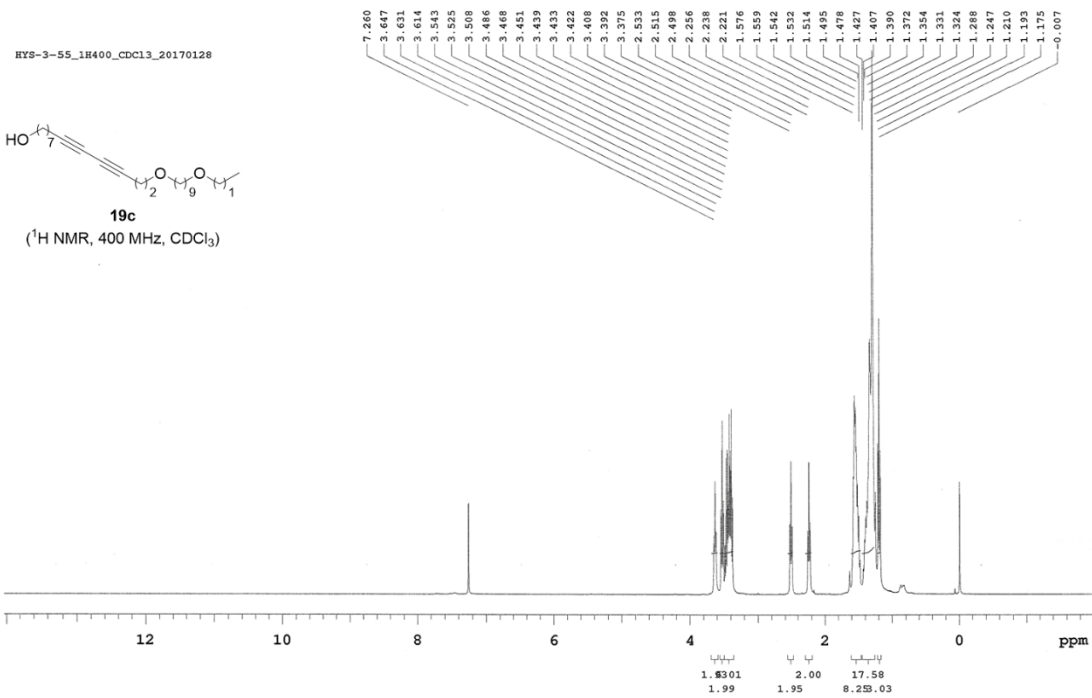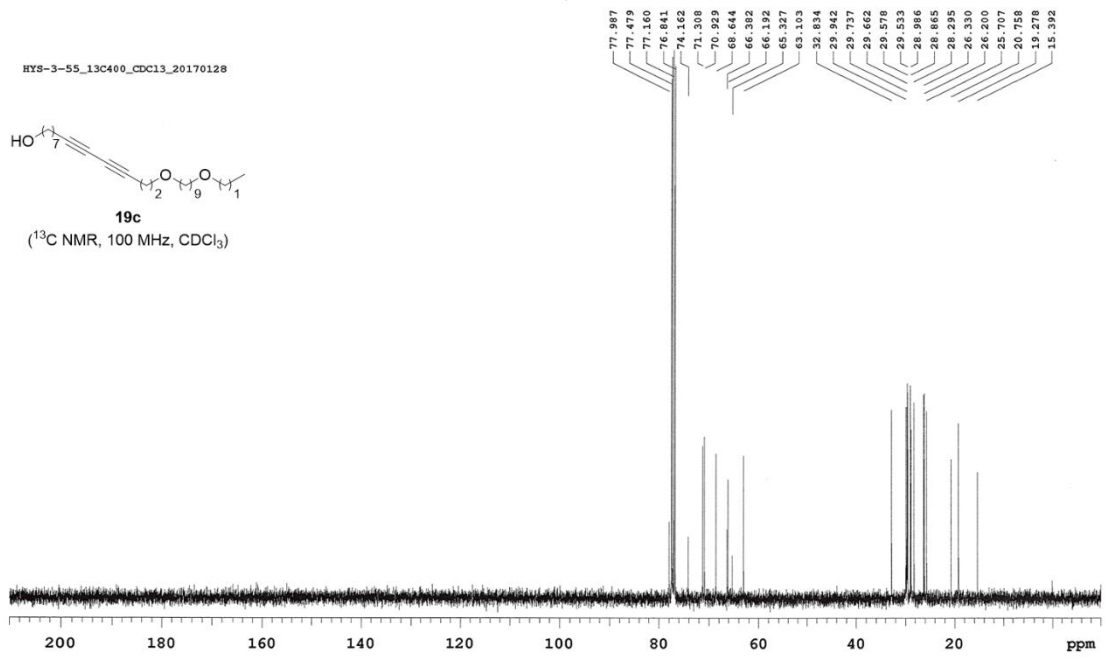



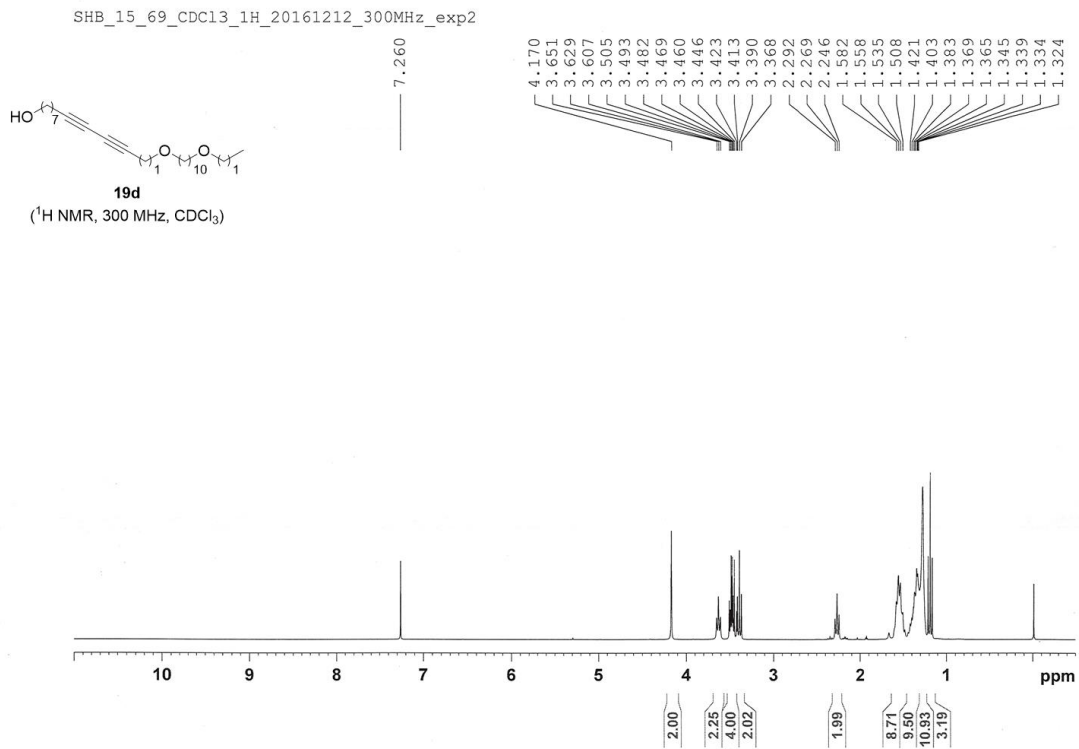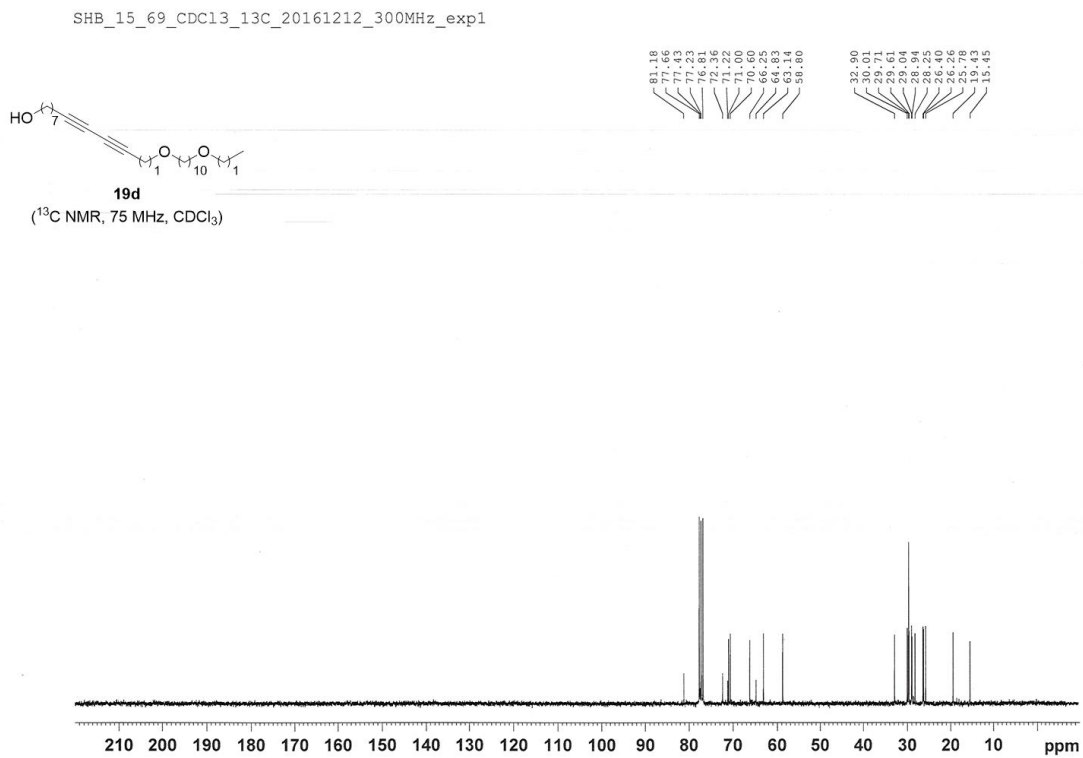

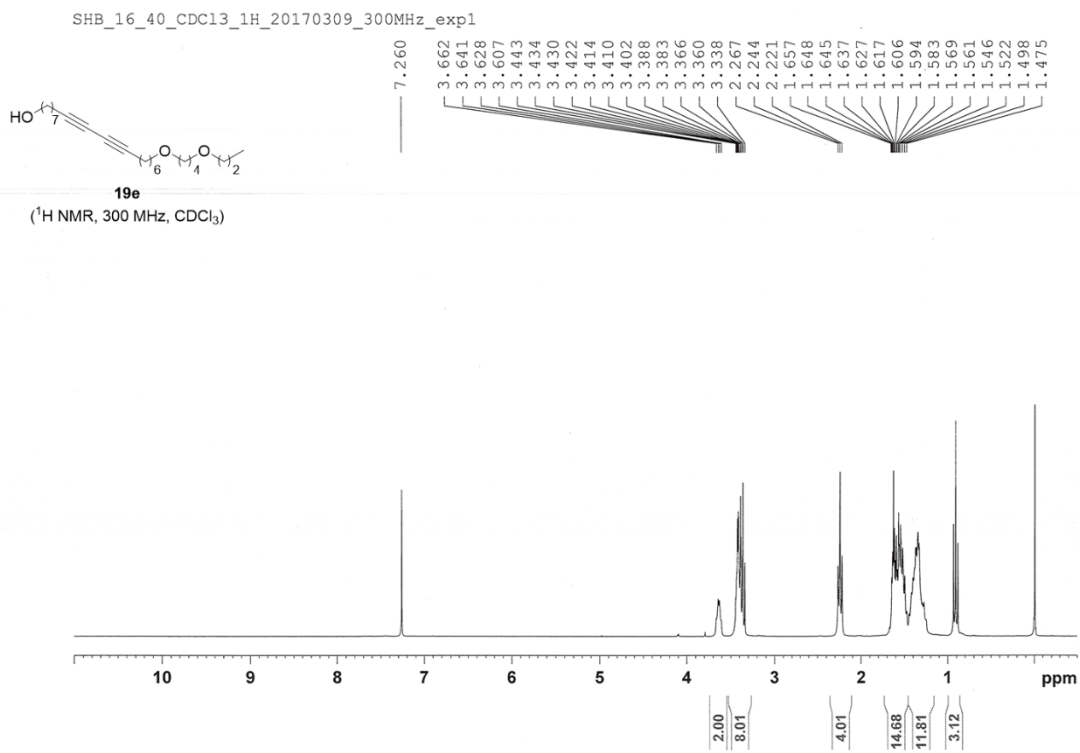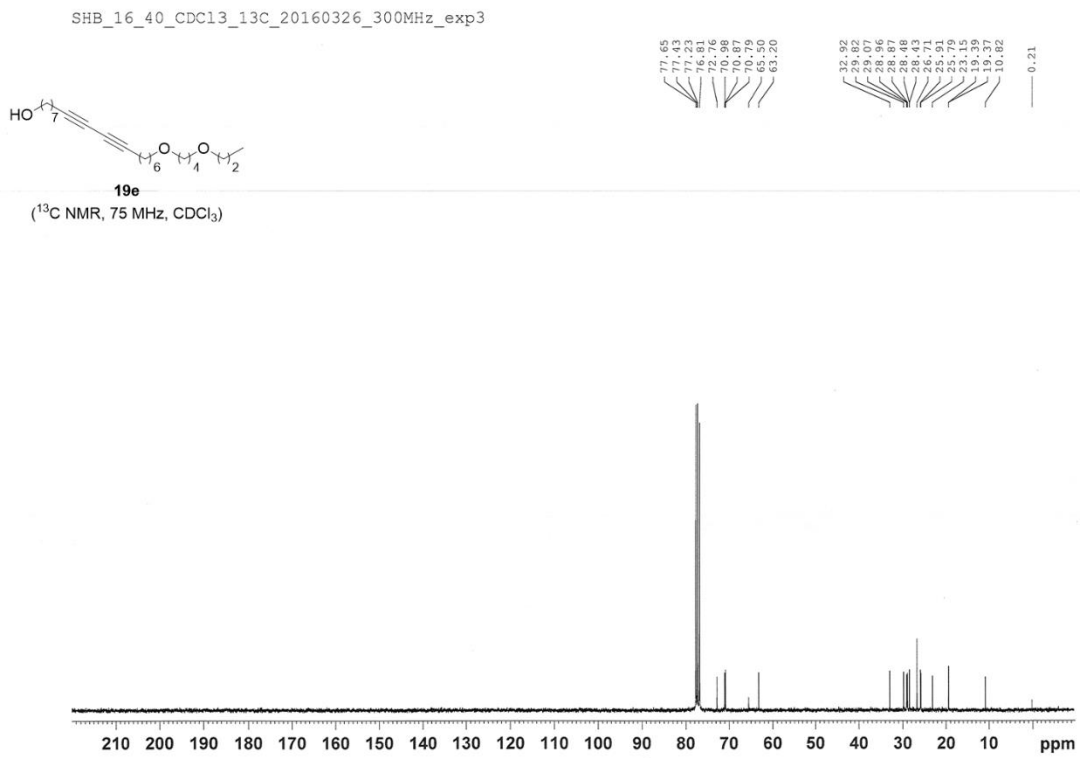

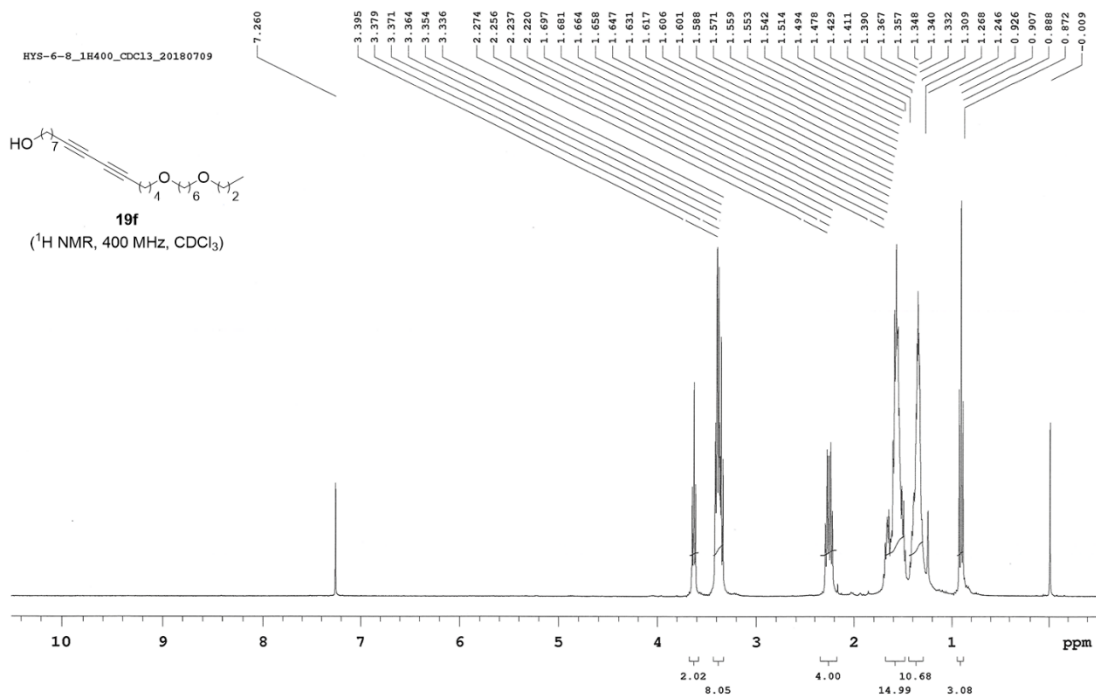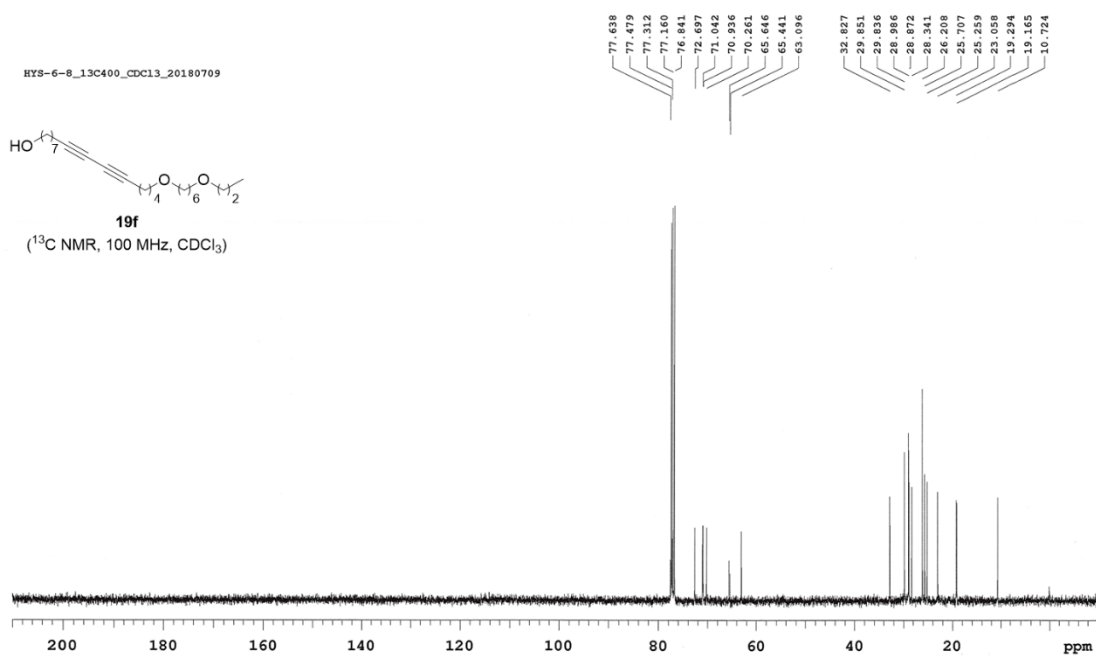

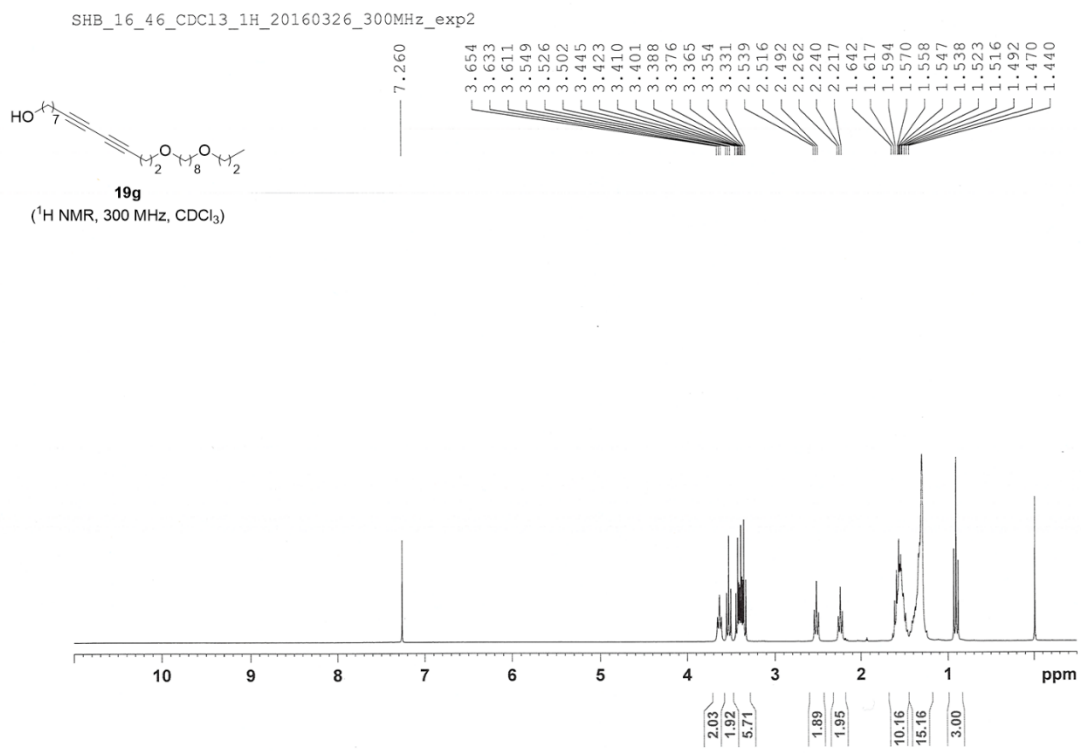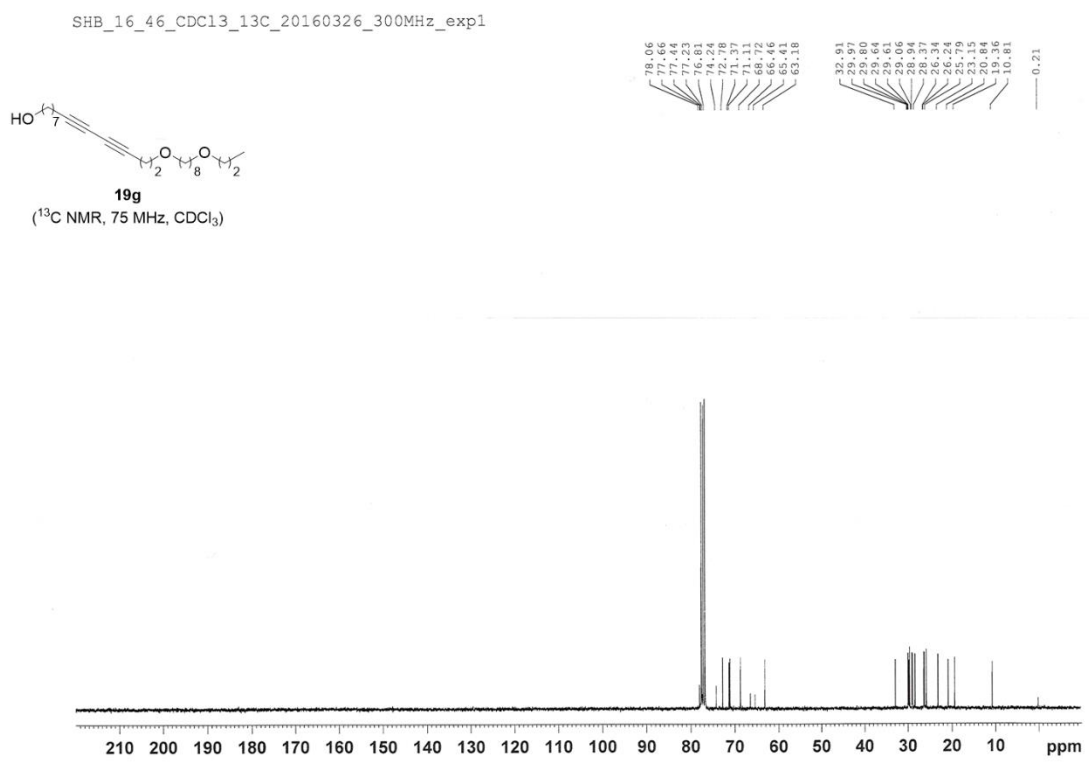

HYS-3-34\_1H500\_CDCl3\_20161221

Sample Name:  
 HYS-3-34\_1H500\_CDCl3\_20161221  
 Data Collected on:  
 Agilent-NMR.chem.com-vmr500  
 Archive directory:  
 /home/vmr1/vmr500/data  
 Sample directory:  
 Ethylindanone  
 FidFile: HYS-3-34\_1H500\_CDCl3\_20161221

Pulse Sequence: PROTON (s2pul)  
 Solvent: cdcl3  
 Data collected on: Dec 21 2016

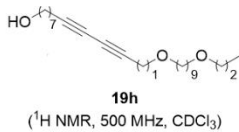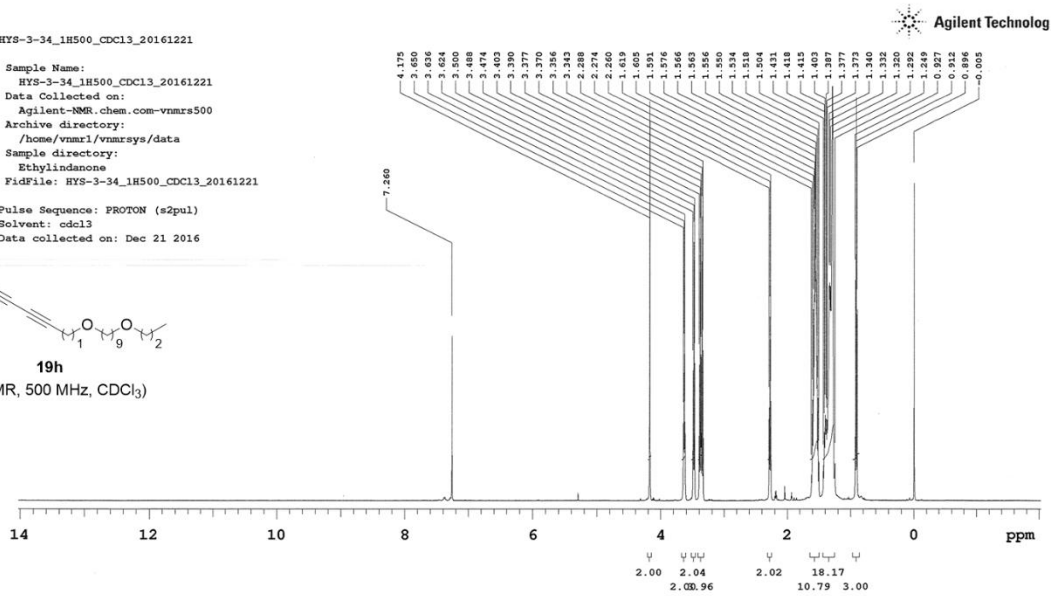

HYS-3-34\_13C500\_CDCl3\_20161221

Sample Name:  
 HYS-3-34\_13C500\_CDCl3\_20161221  
 Data Collected on:  
 Agilent-NMR.chem.com-vmr500  
 Archive directory:  
 Sample directory:  
 FidFile: CARBON

Pulse Sequence: CARBON (s2pul)  
 Solvent: cdcl3  
 Data collected on: Dec 21 2016

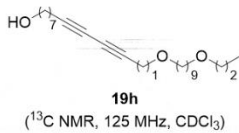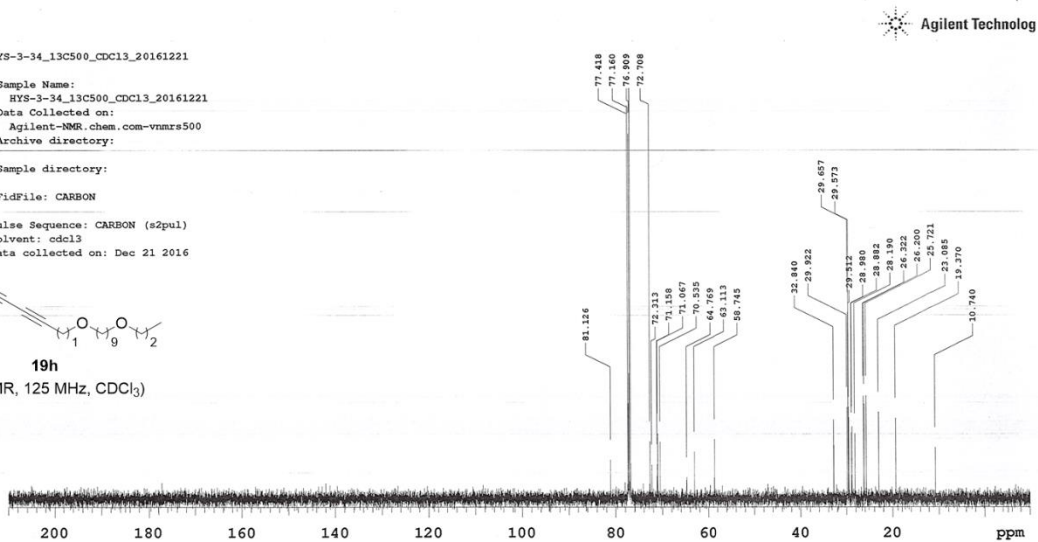

HYS-3-79\_1H400\_CDCl3\_20170330

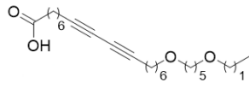

**20a**  
(<sup>1</sup>H NMR, 400 MHz, CDCl<sub>3</sub>)

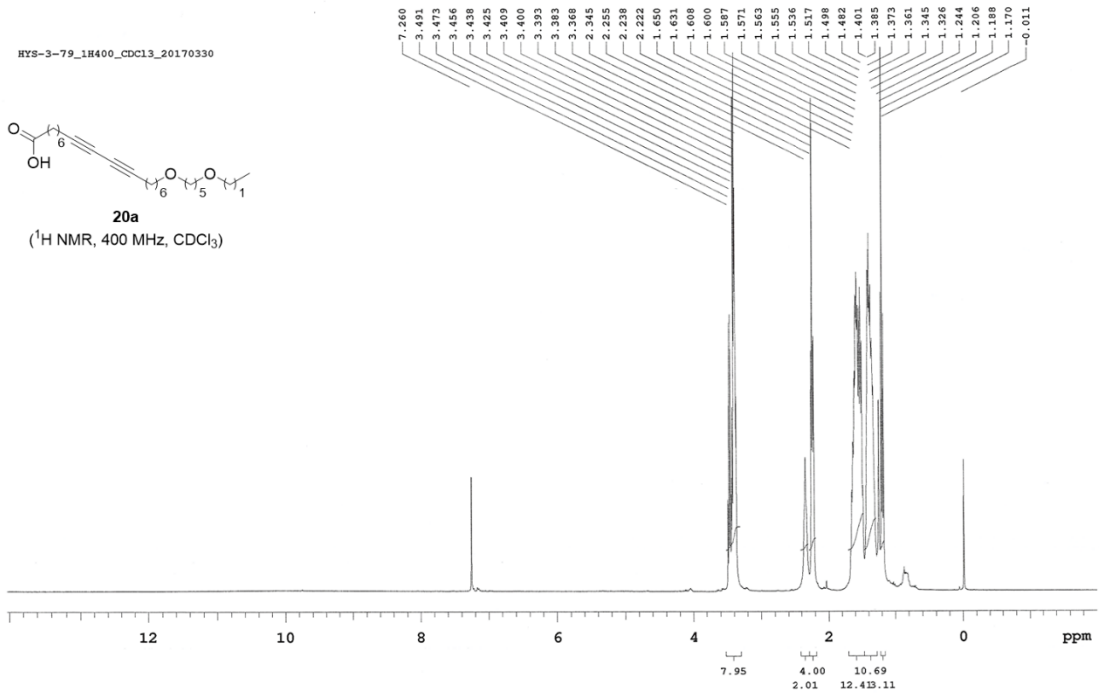

HYS-3-79\_13C400\_CDCl3\_20170331

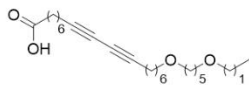

**20a**  
(<sup>13</sup>C NMR, 100 MHz, CDCl<sub>3</sub>)

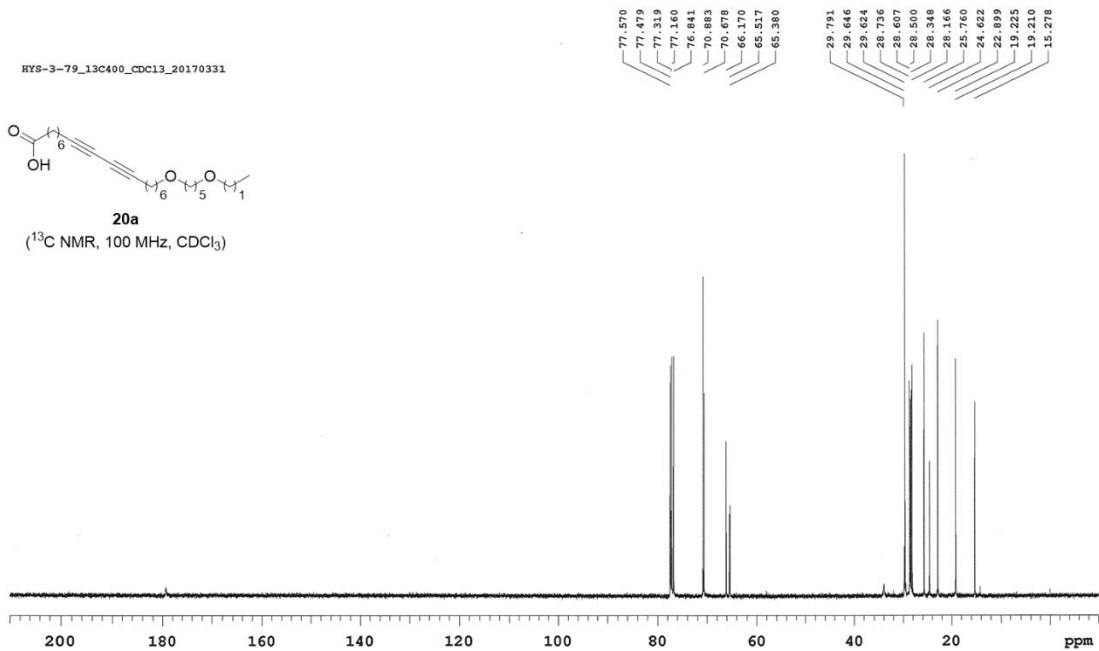

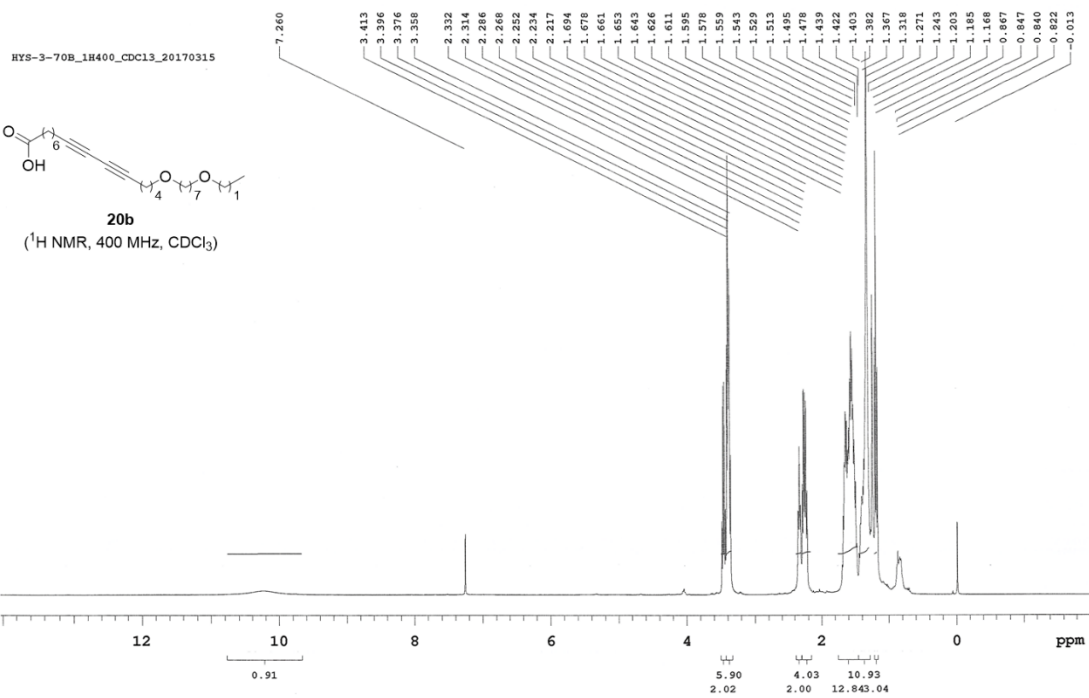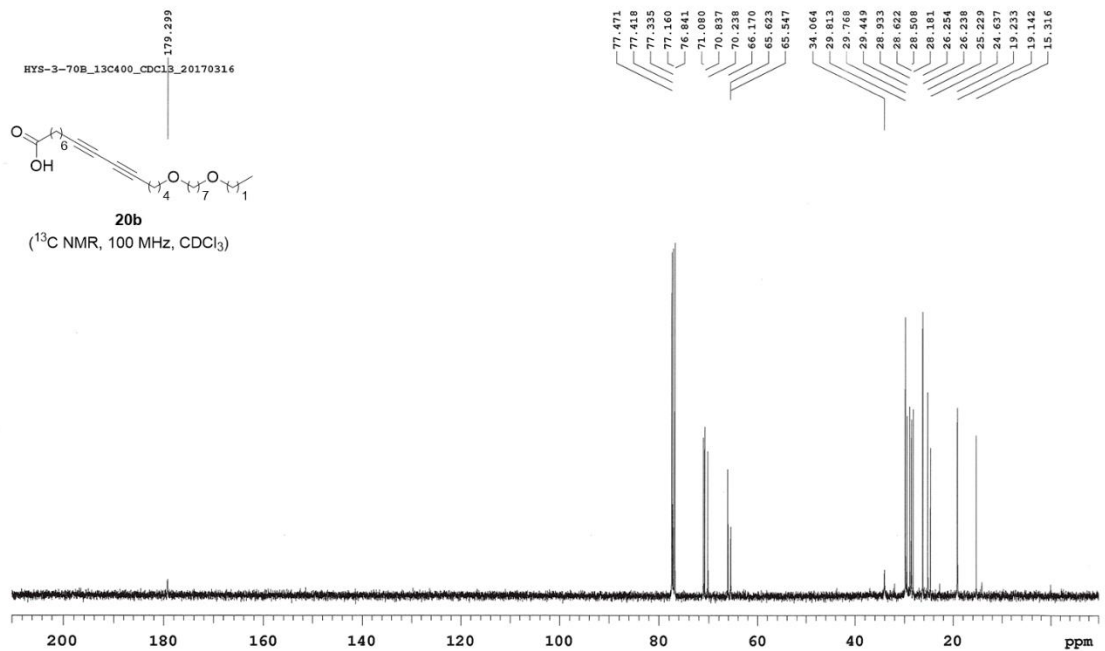

HYS-3-67\_1H400\_CDCl3\_20170305

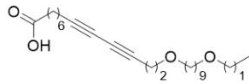

**20c**

(<sup>1</sup>H NMR, 400 MHz, CDCl<sub>3</sub>)

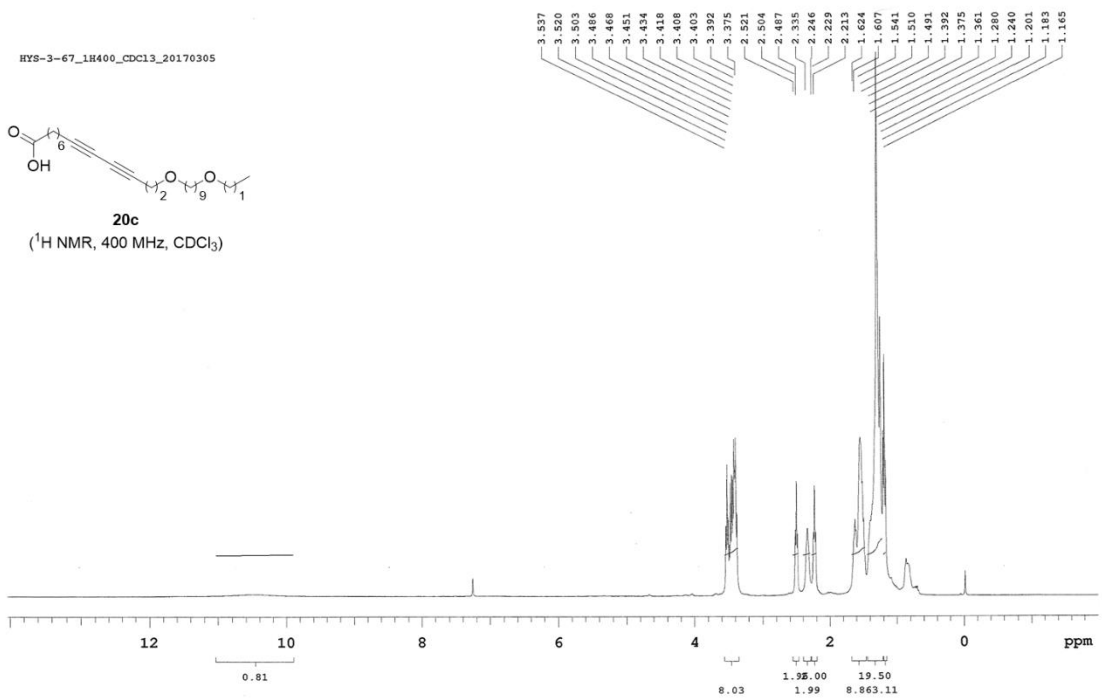

HYS-3-67\_13C400\_CDCl3\_20170305

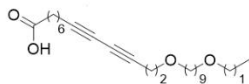

**20c**

(<sup>13</sup>C NMR, 100 MHz, CDCl<sub>3</sub>)

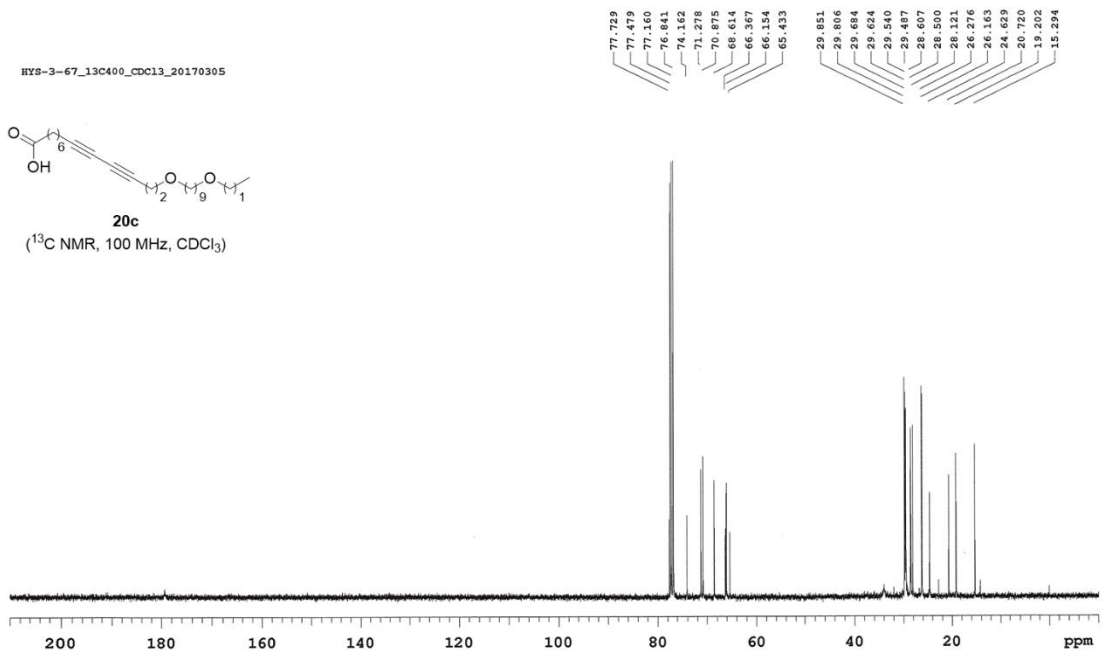



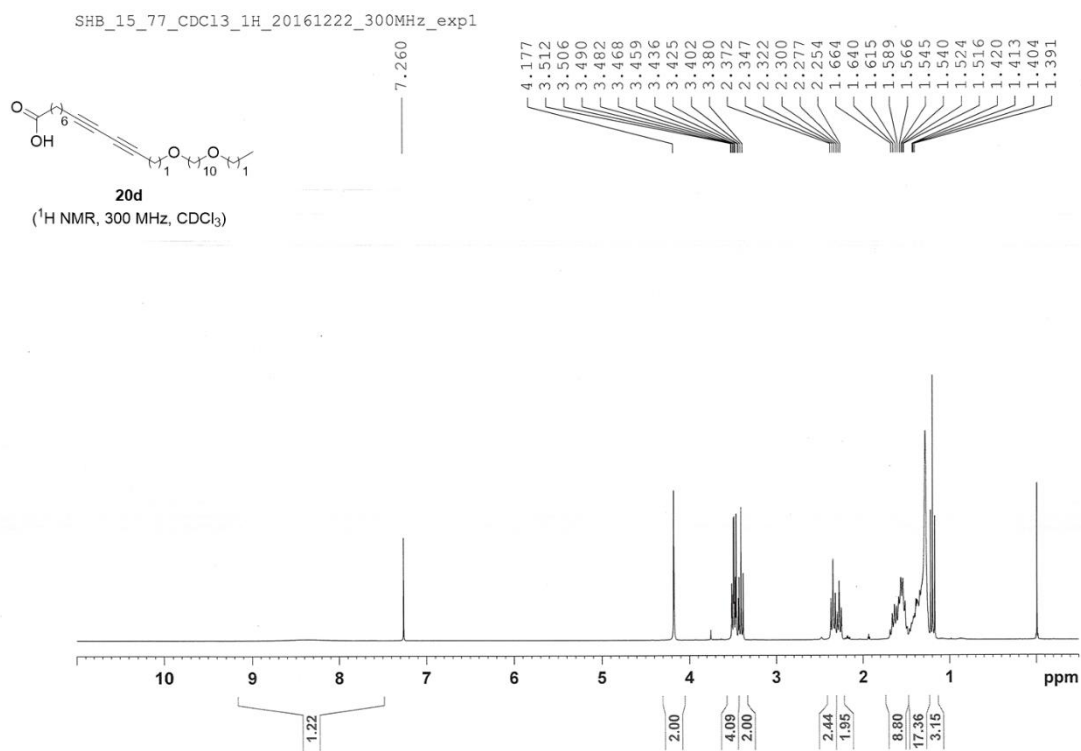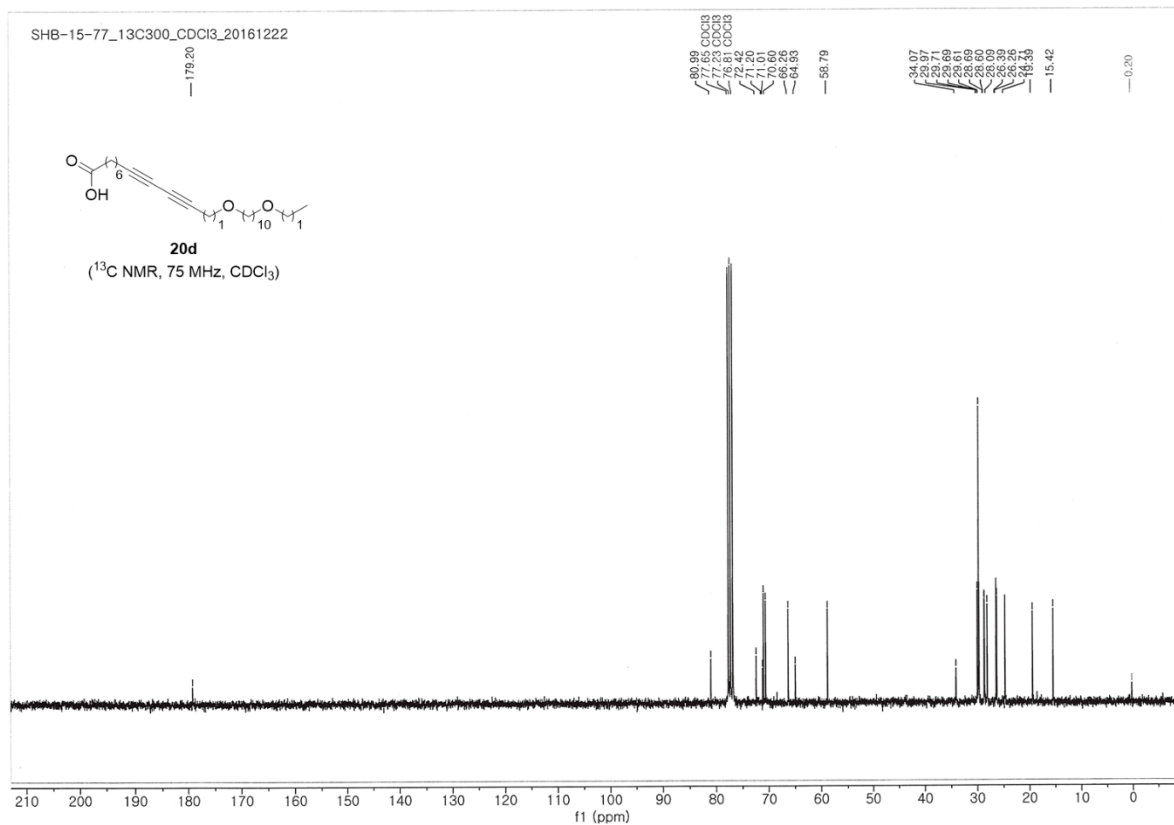

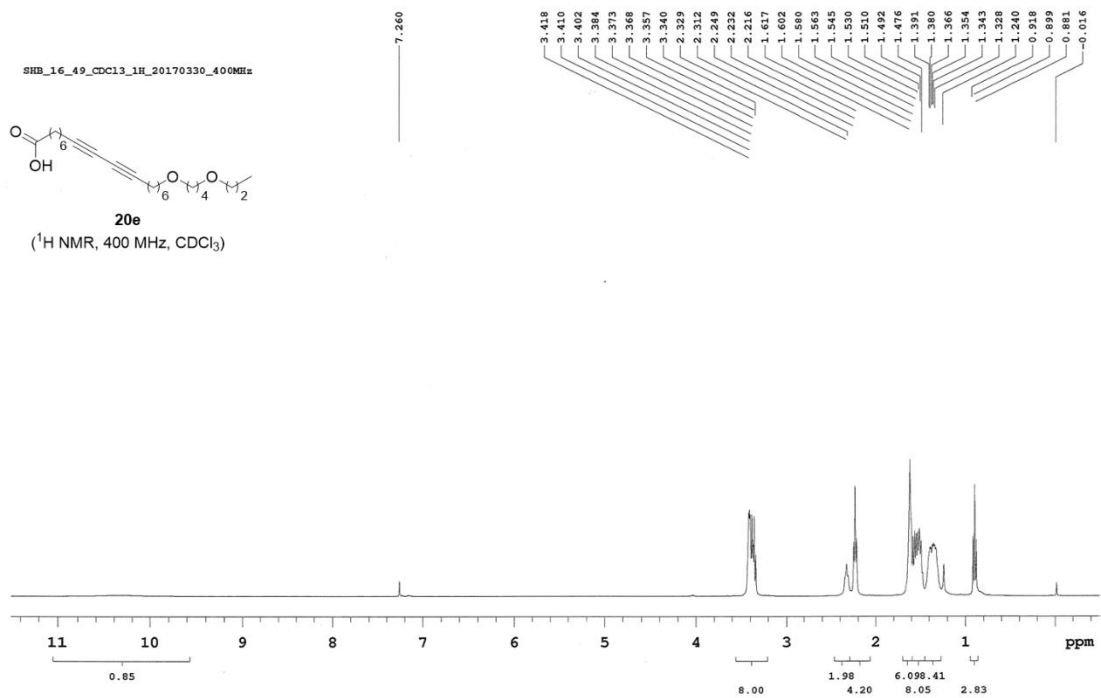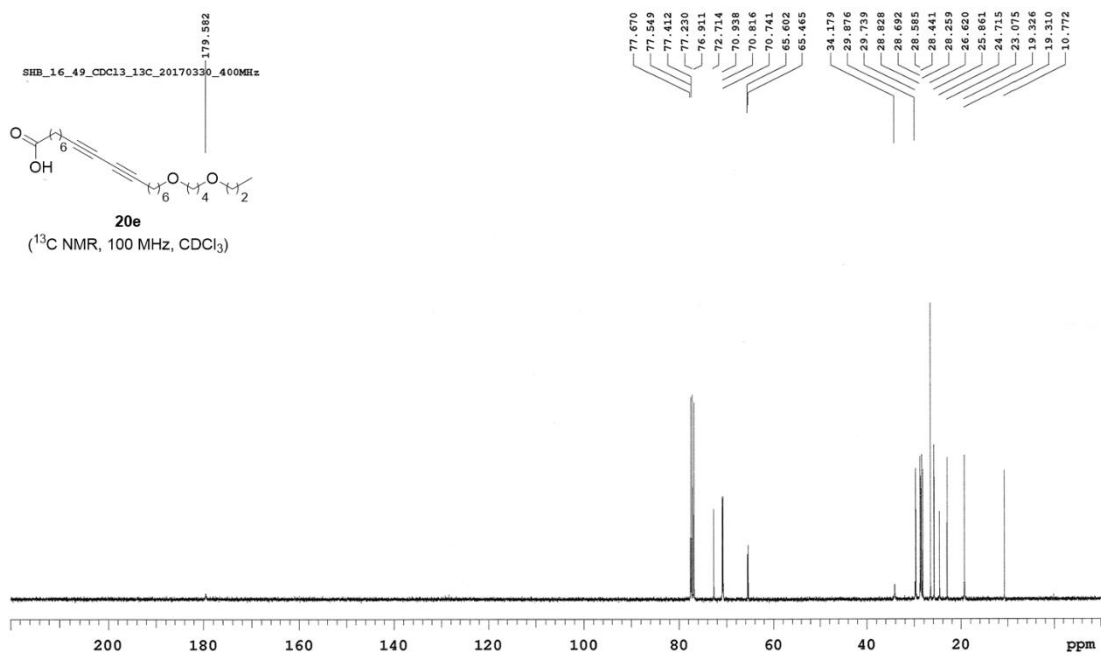

SHB\_16\_48\_CDCl3\_1H\_20170329\_400MHz

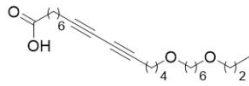

20f

(<sup>1</sup>H NMR, 400 MHz, CDCl<sub>3</sub>)

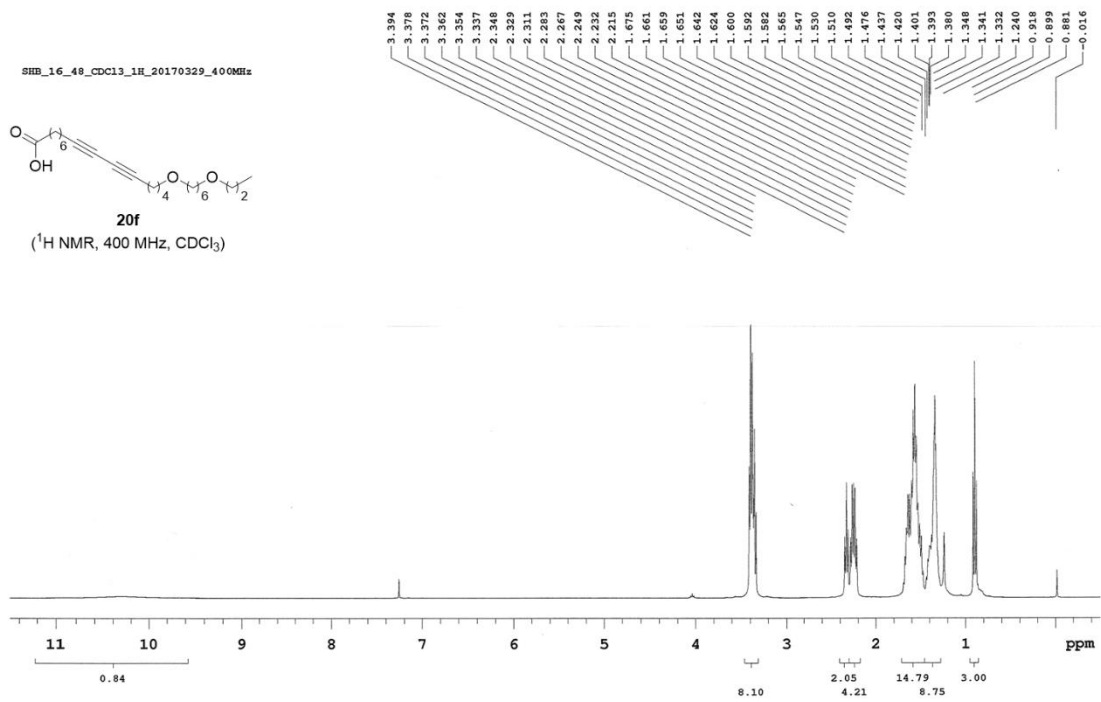

SHB\_16\_48\_CDCl3\_13C\_20170329\_400MHz

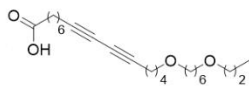

20f

(<sup>13</sup>C NMR, 100 MHz, CDCl<sub>3</sub>)

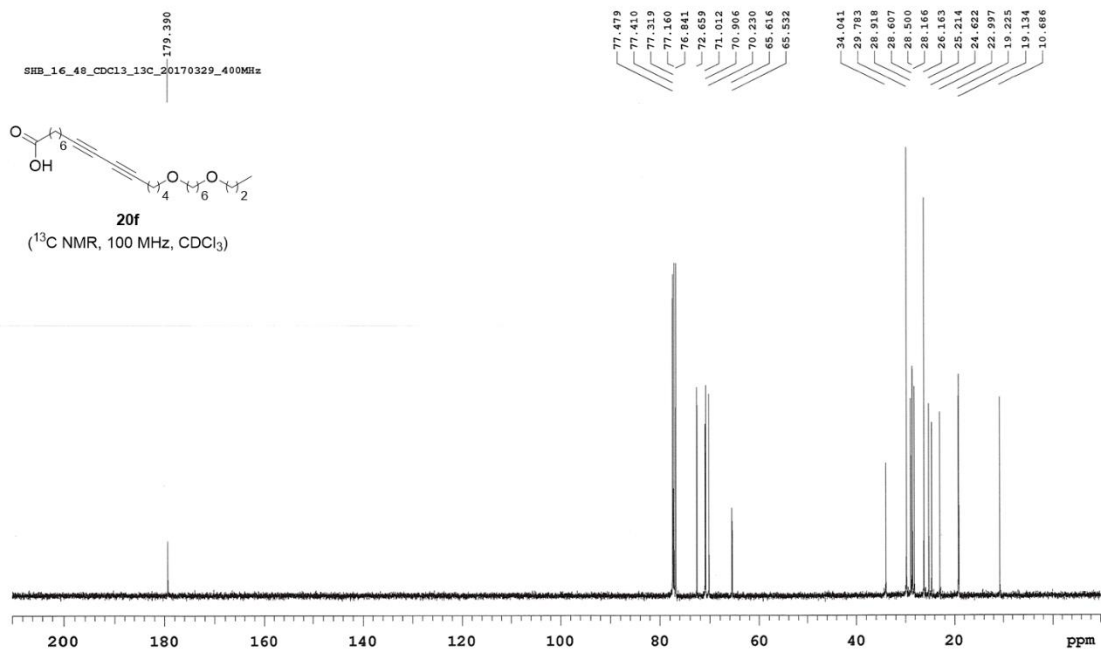

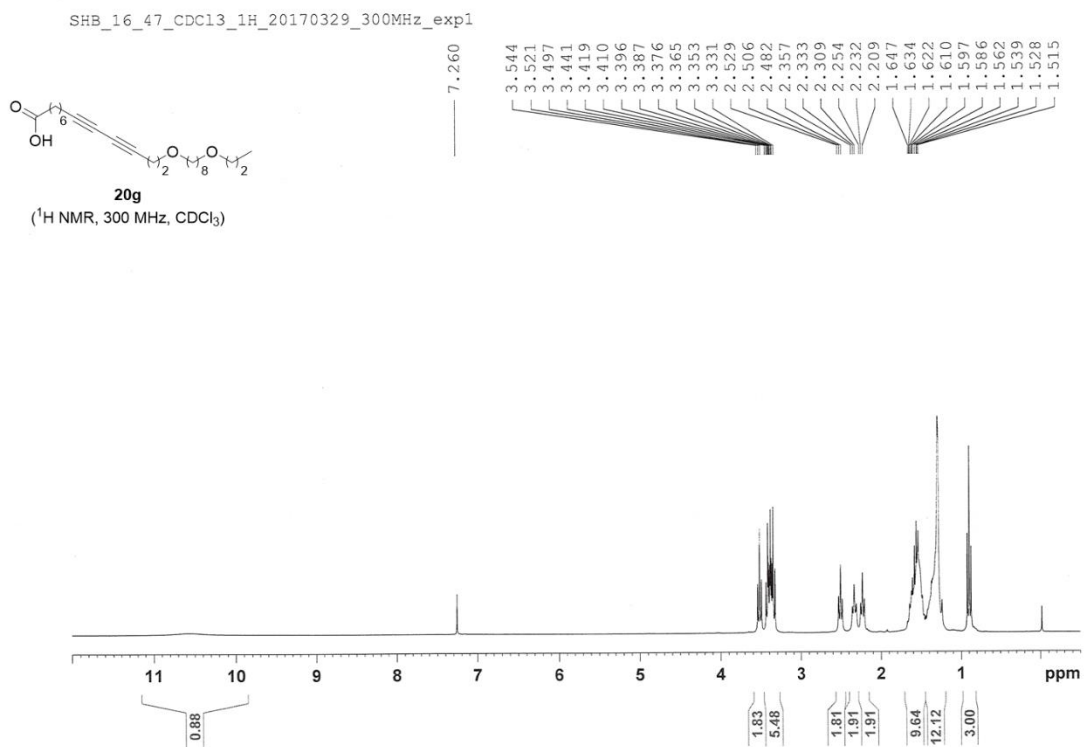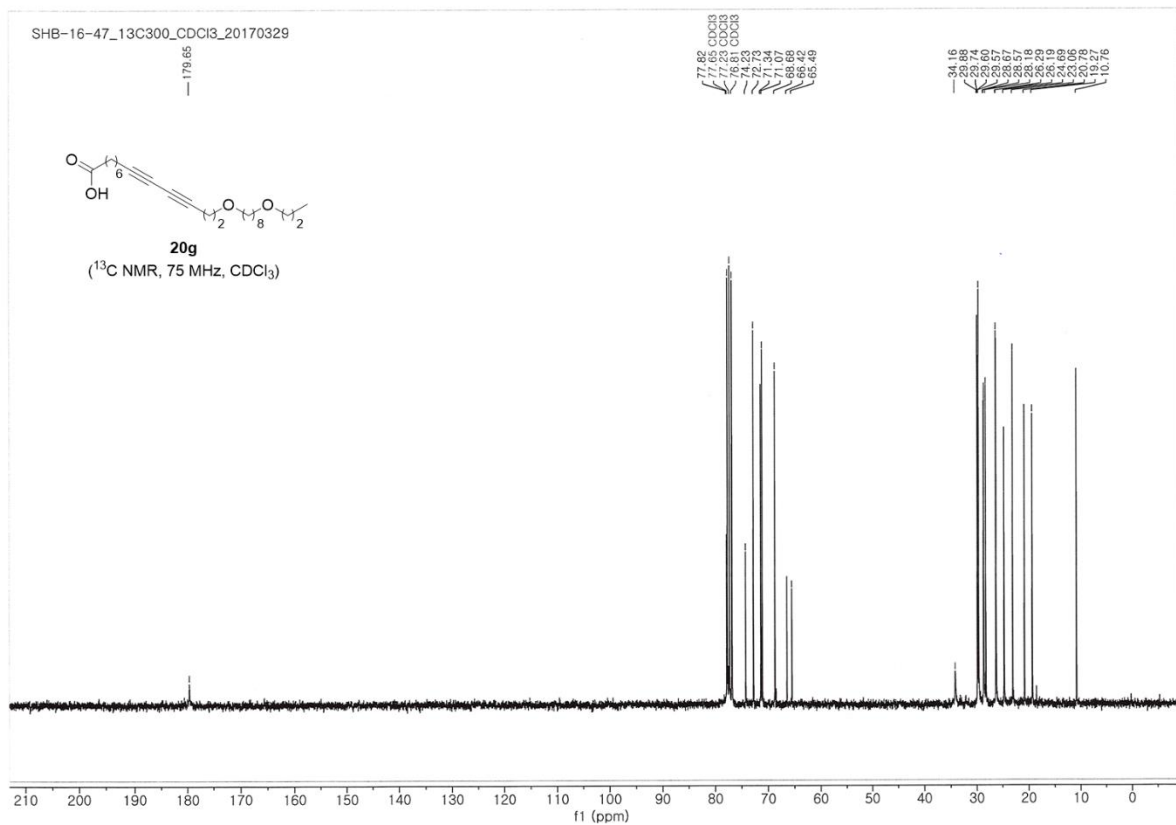

HYS-3-58\_1H400\_CDC13\_20170203

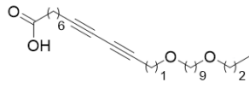

**20h**  
(<sup>1</sup>H NMR, 400 MHz, CDCl<sub>3</sub>)

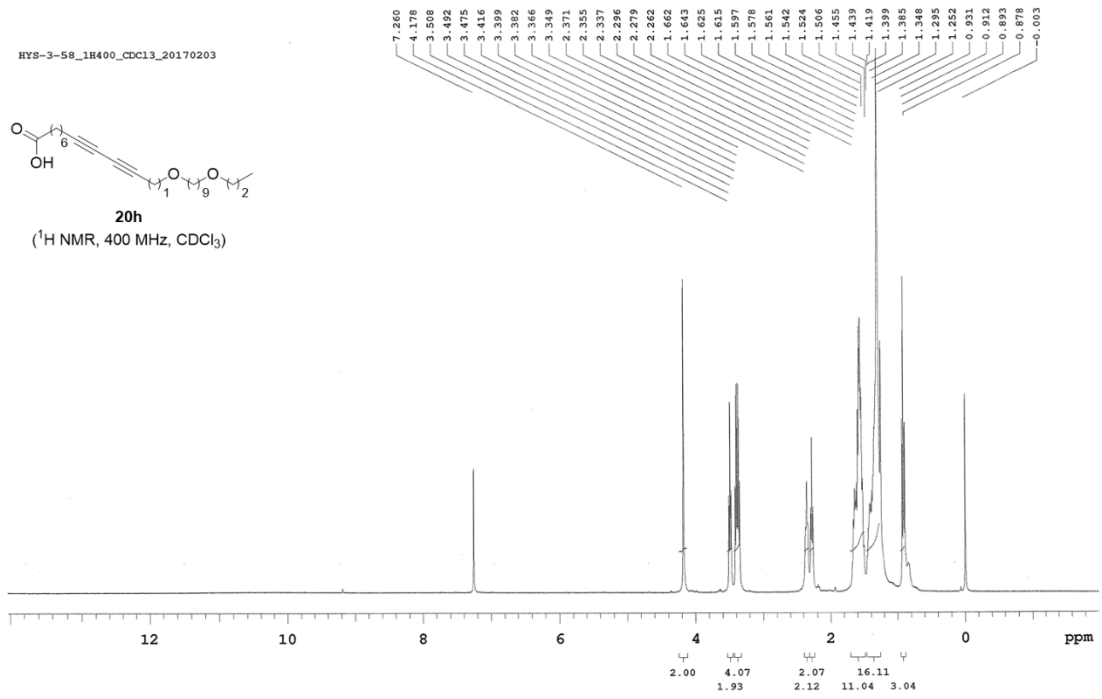

HYS-3-58\_13C400\_CDC13\_20170206

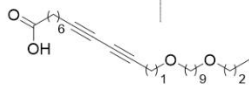

**20h**  
(<sup>13</sup>C NMR, 100 MHz, CDCl<sub>3</sub>)

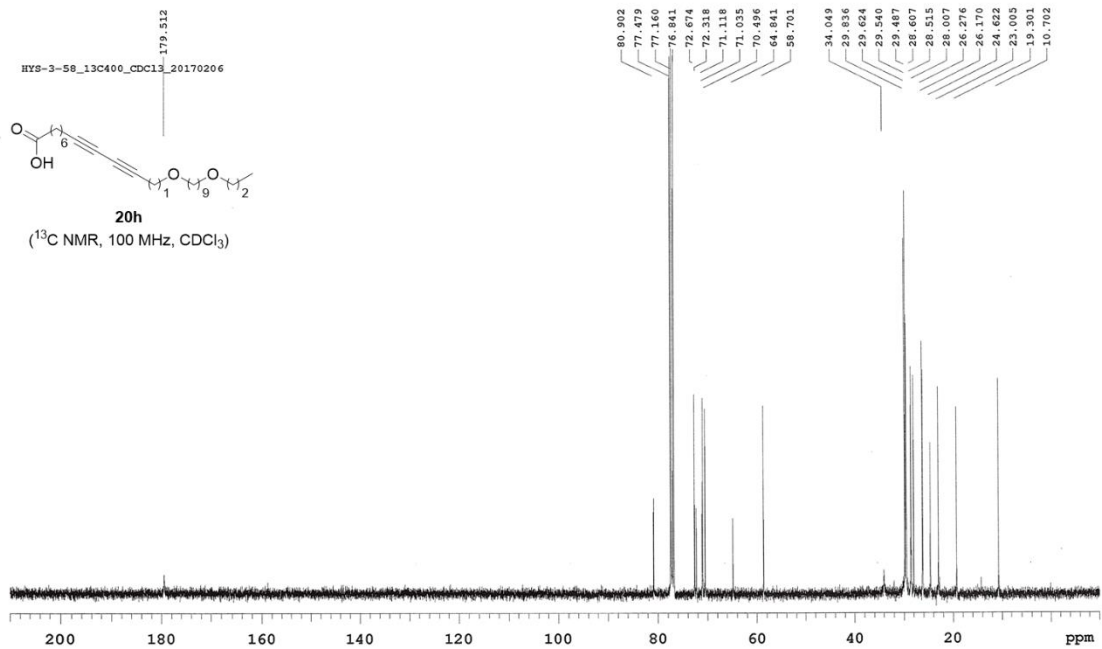

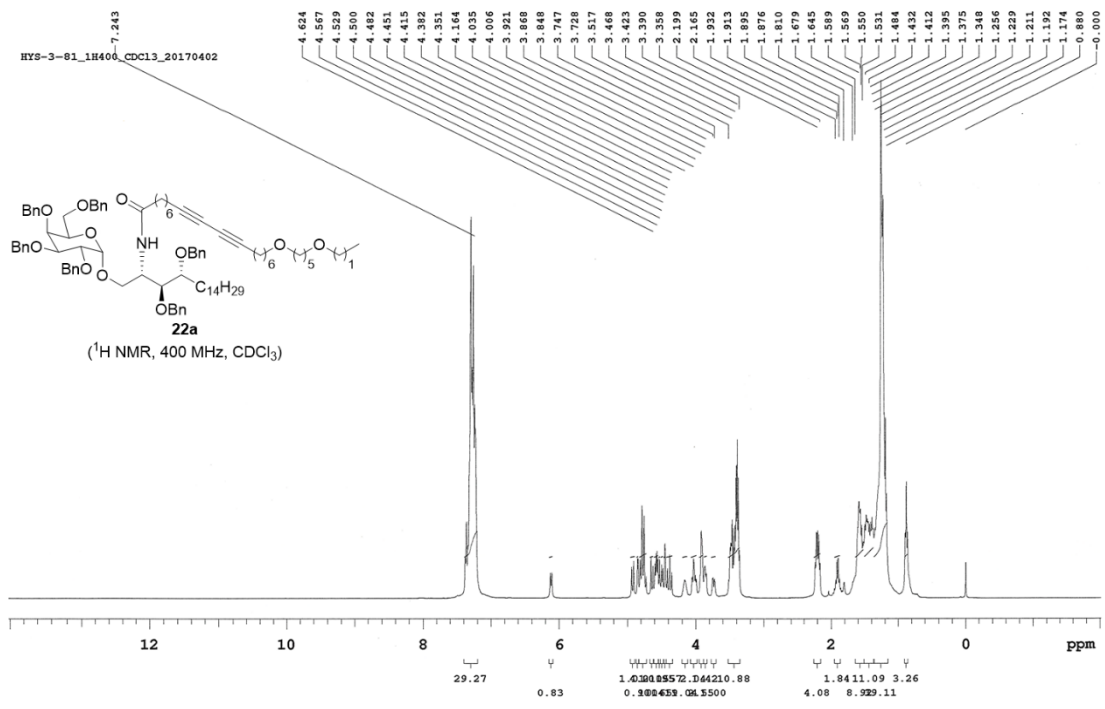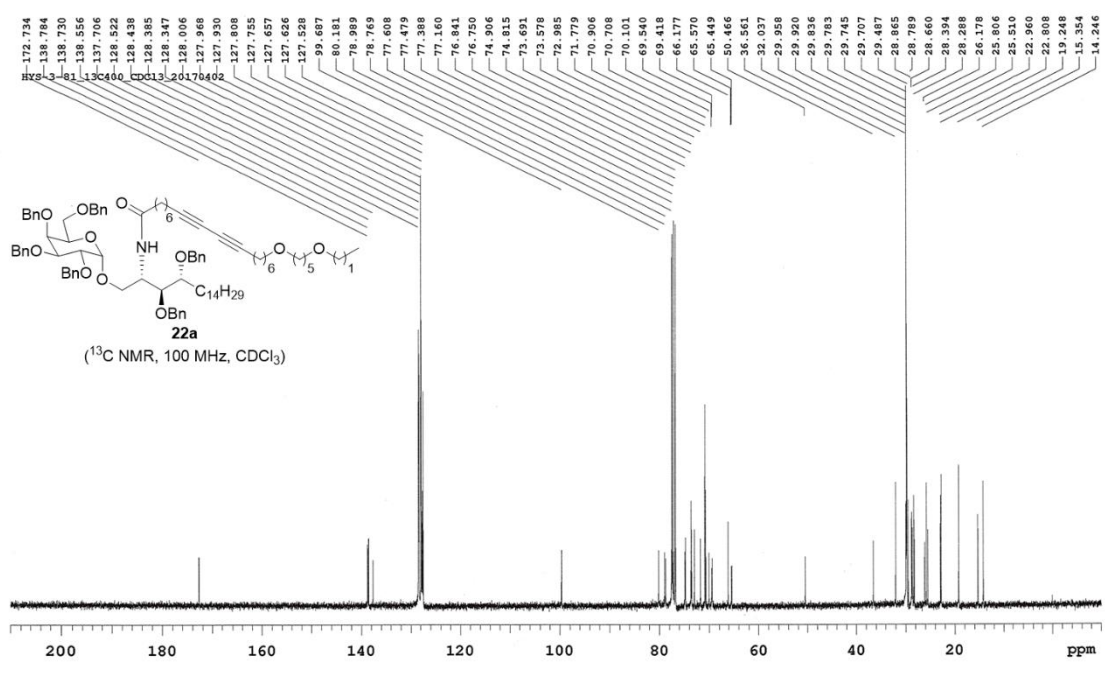

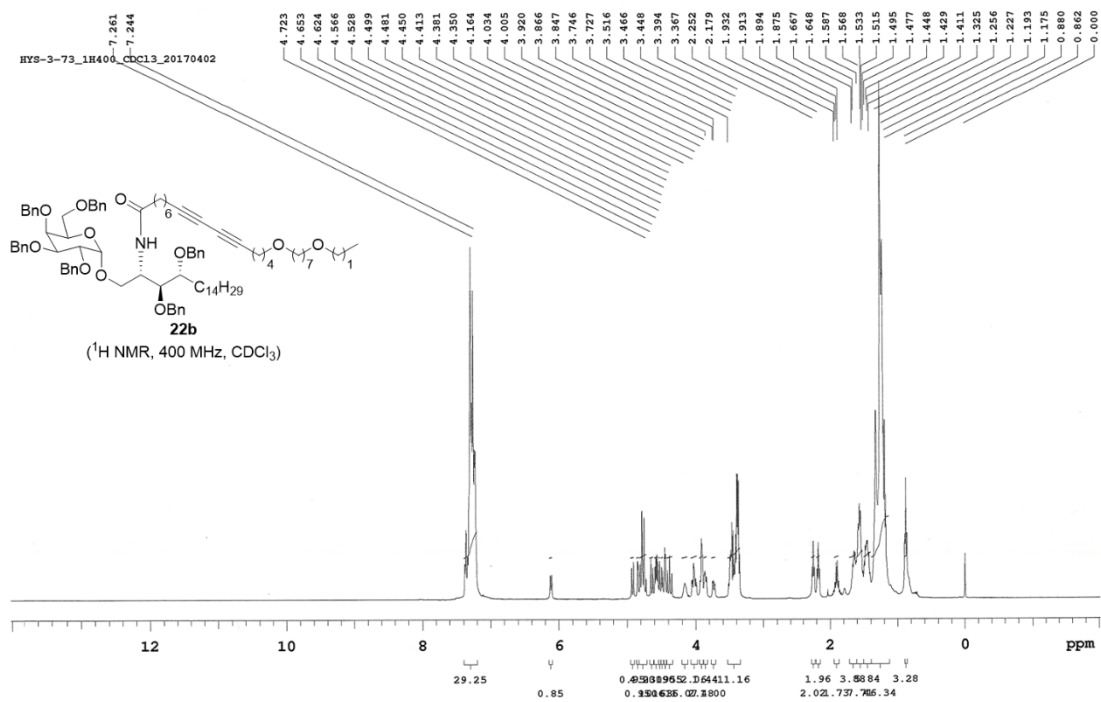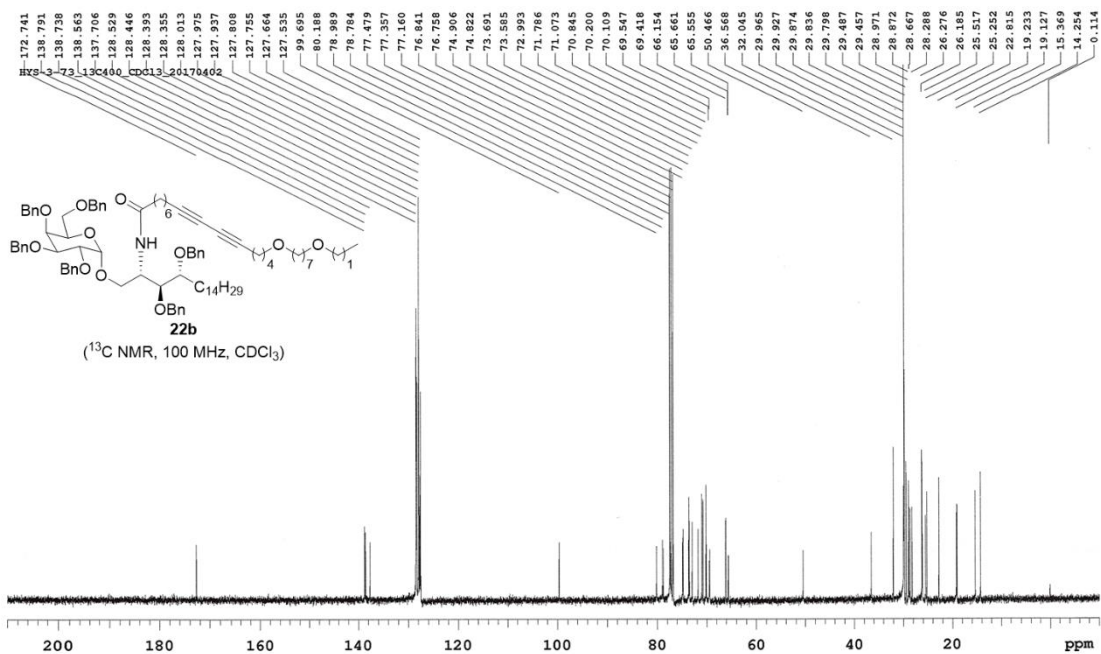

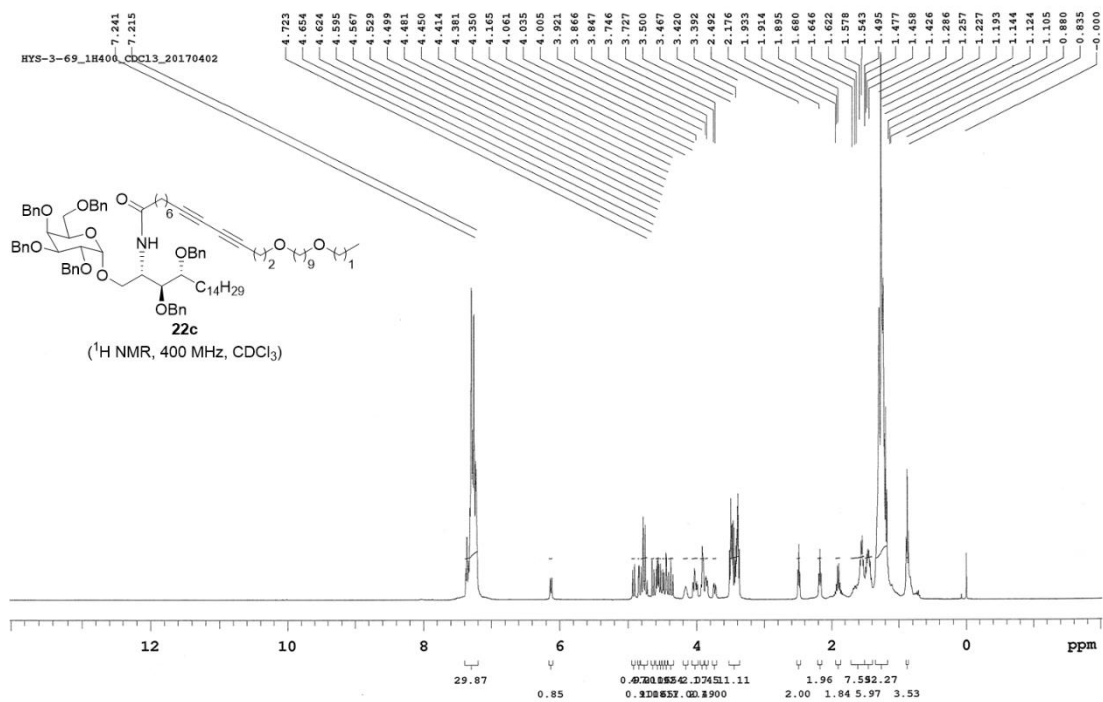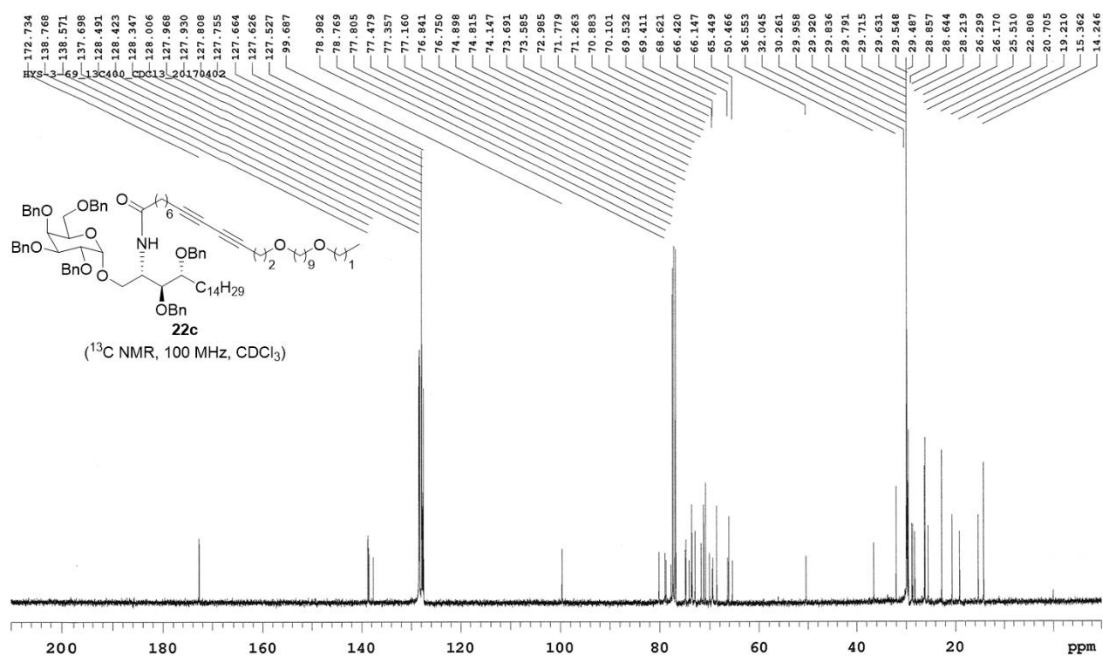



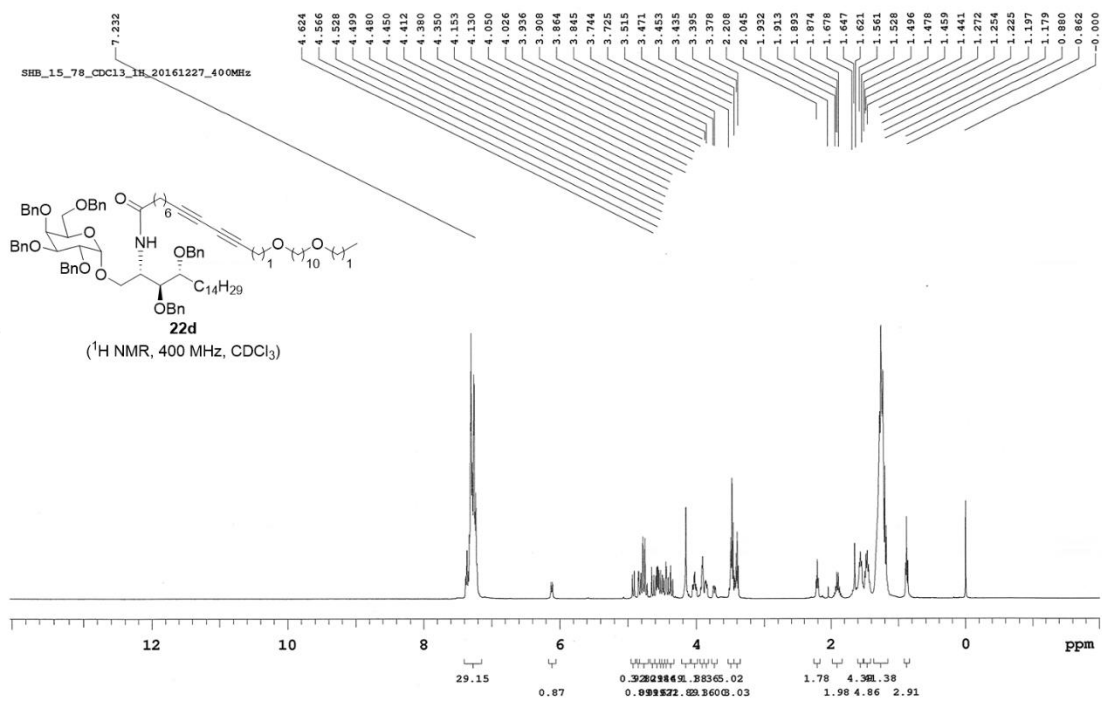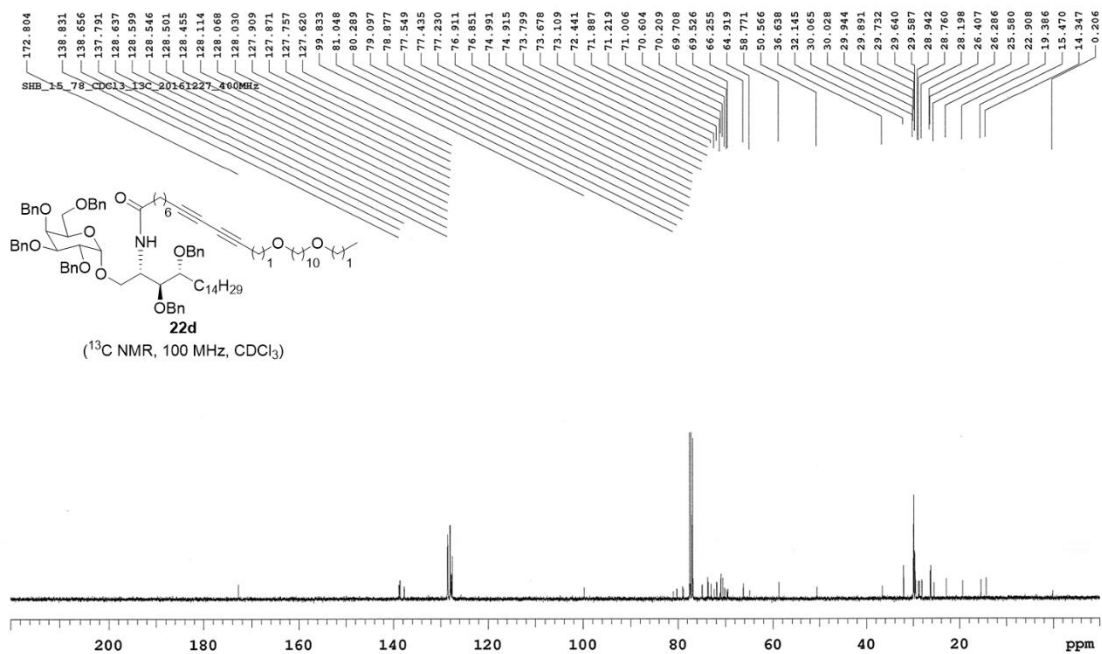

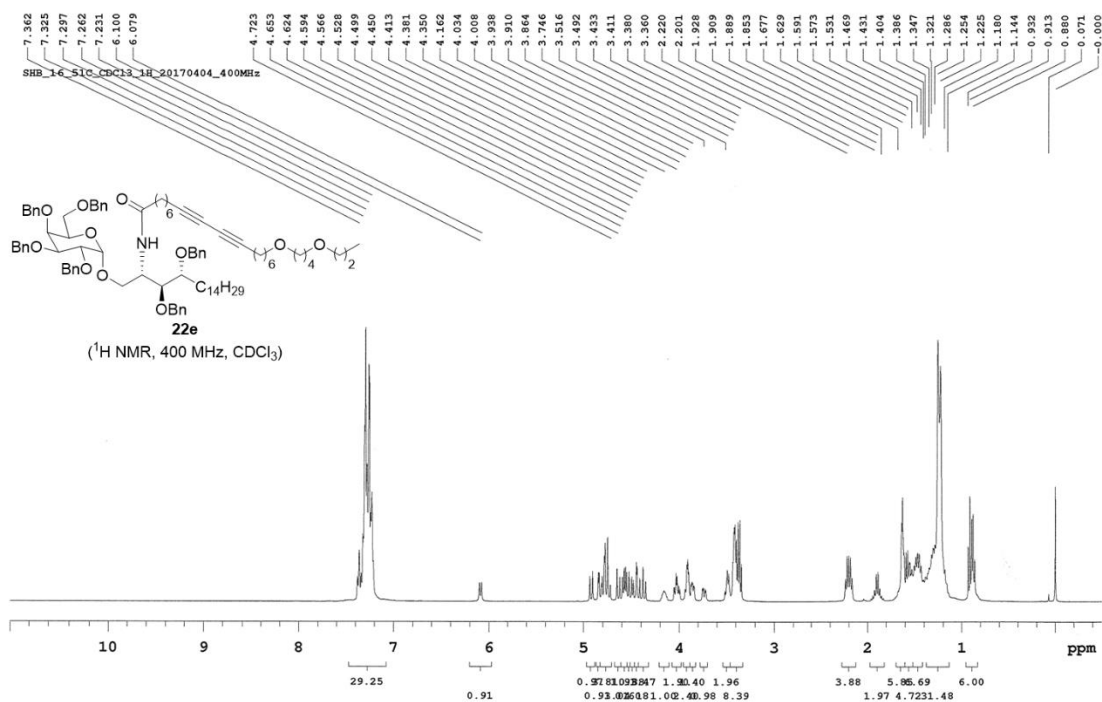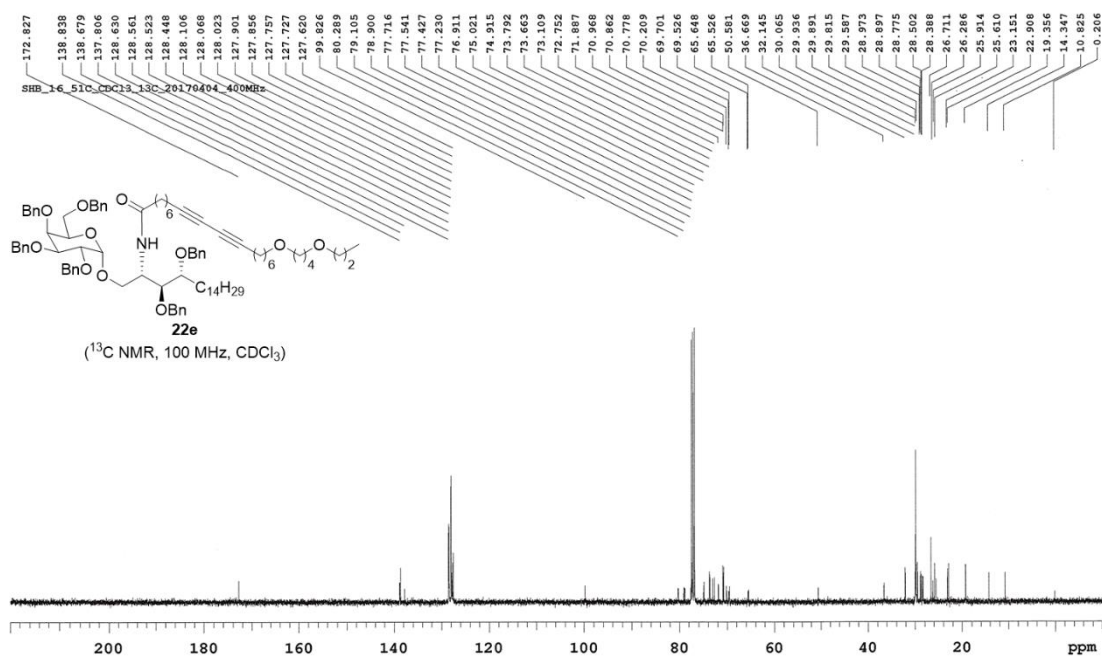

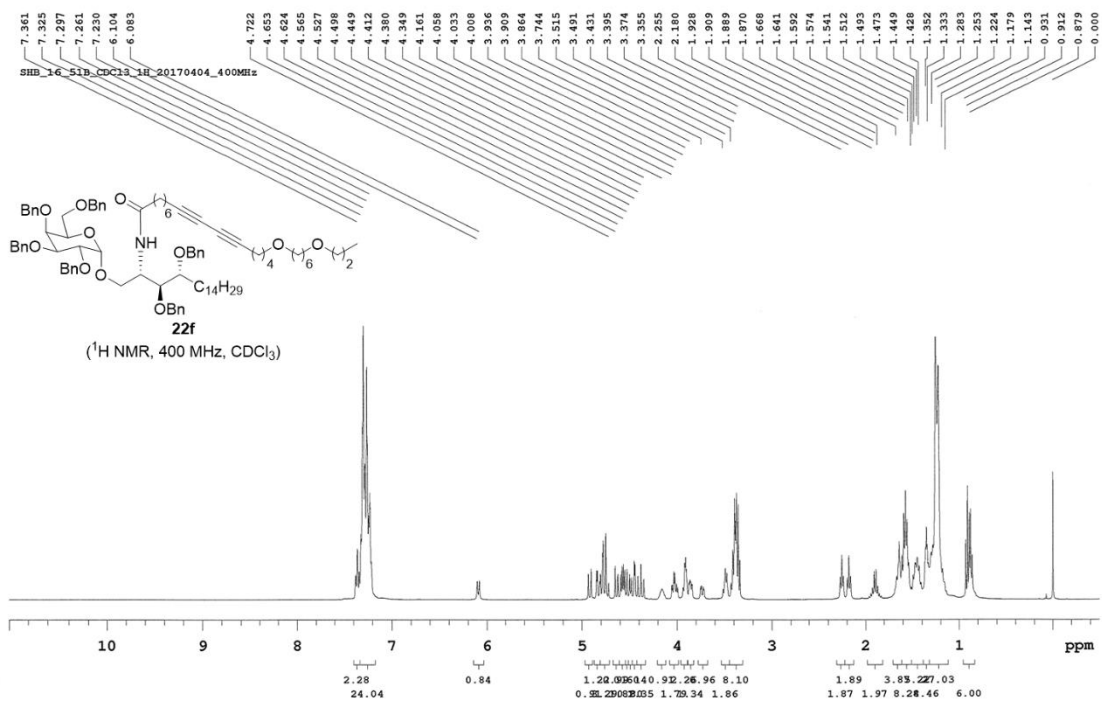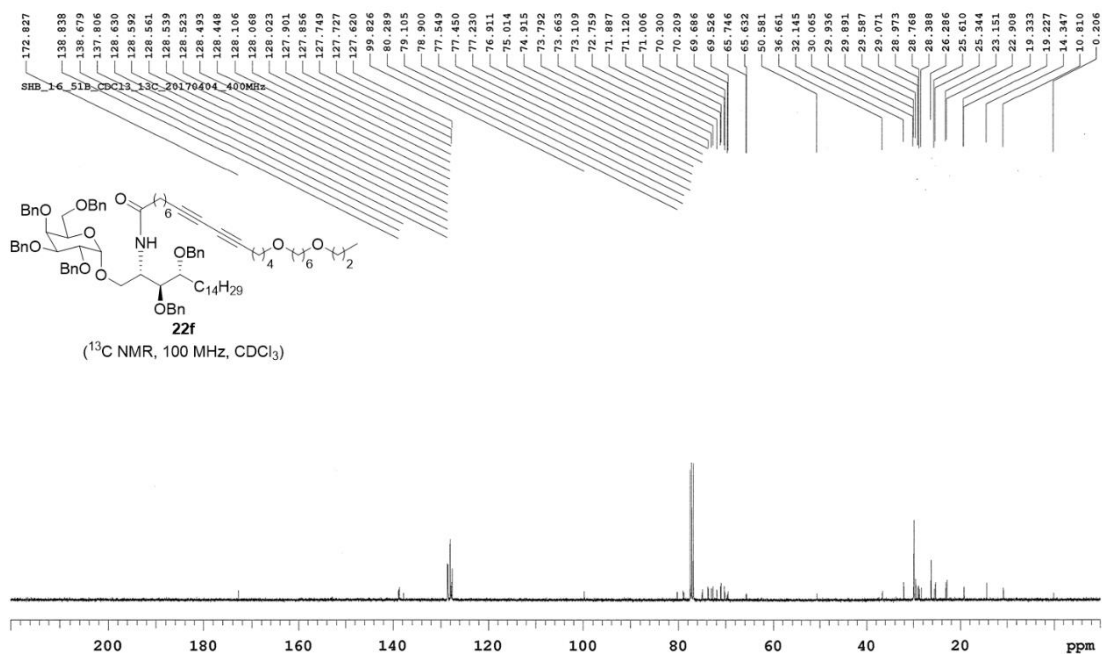

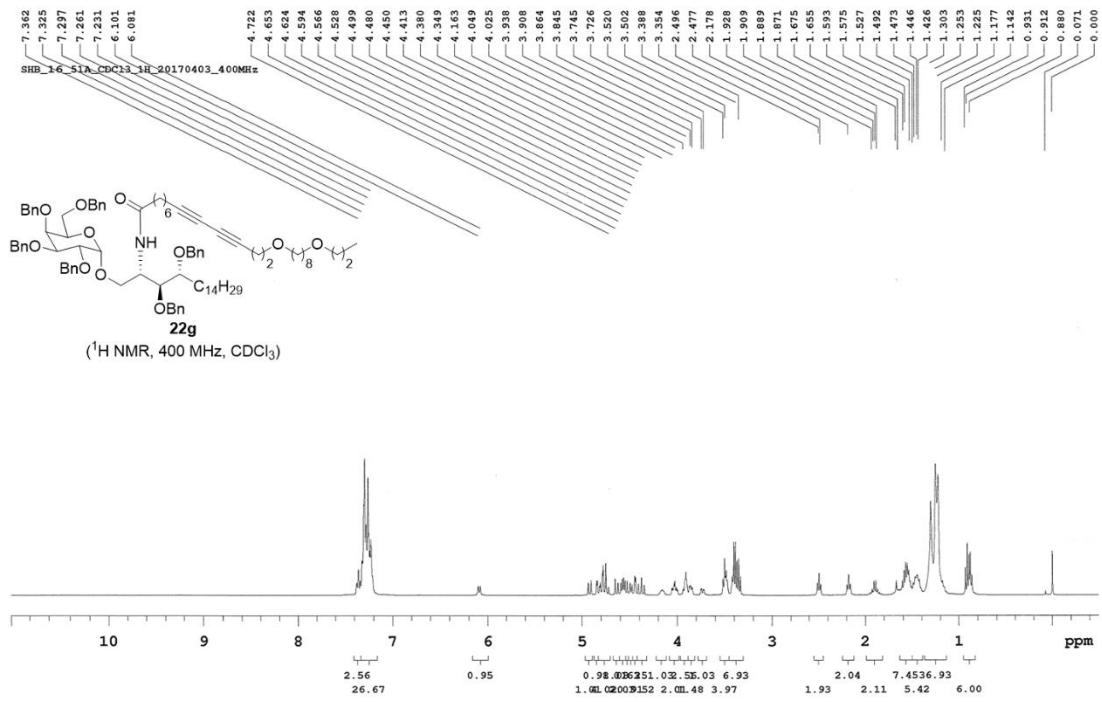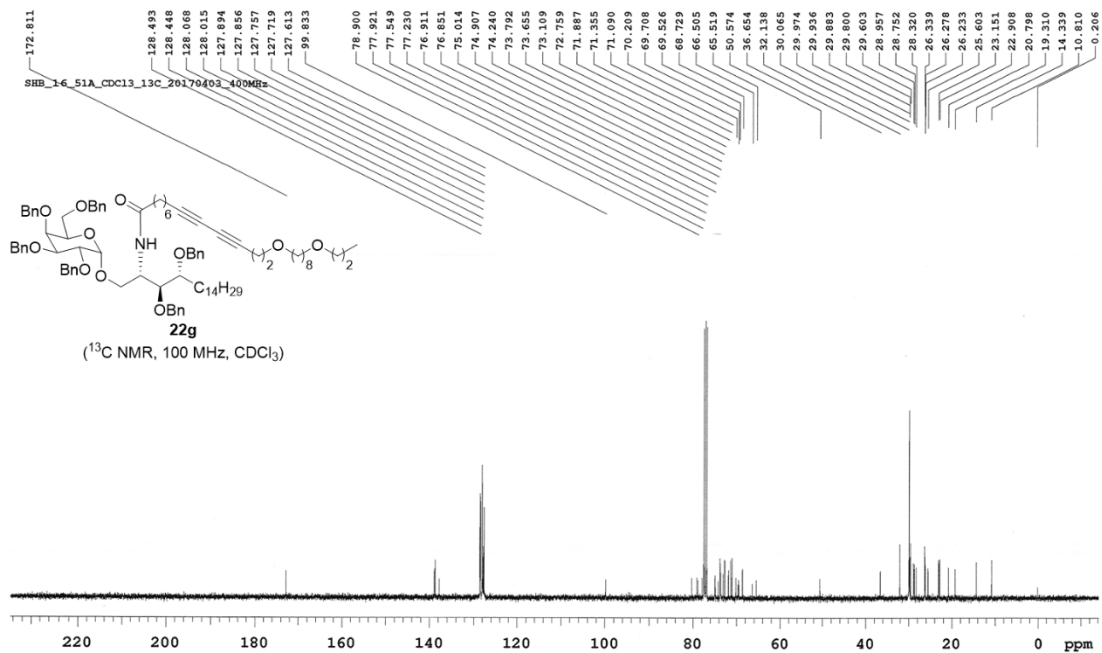

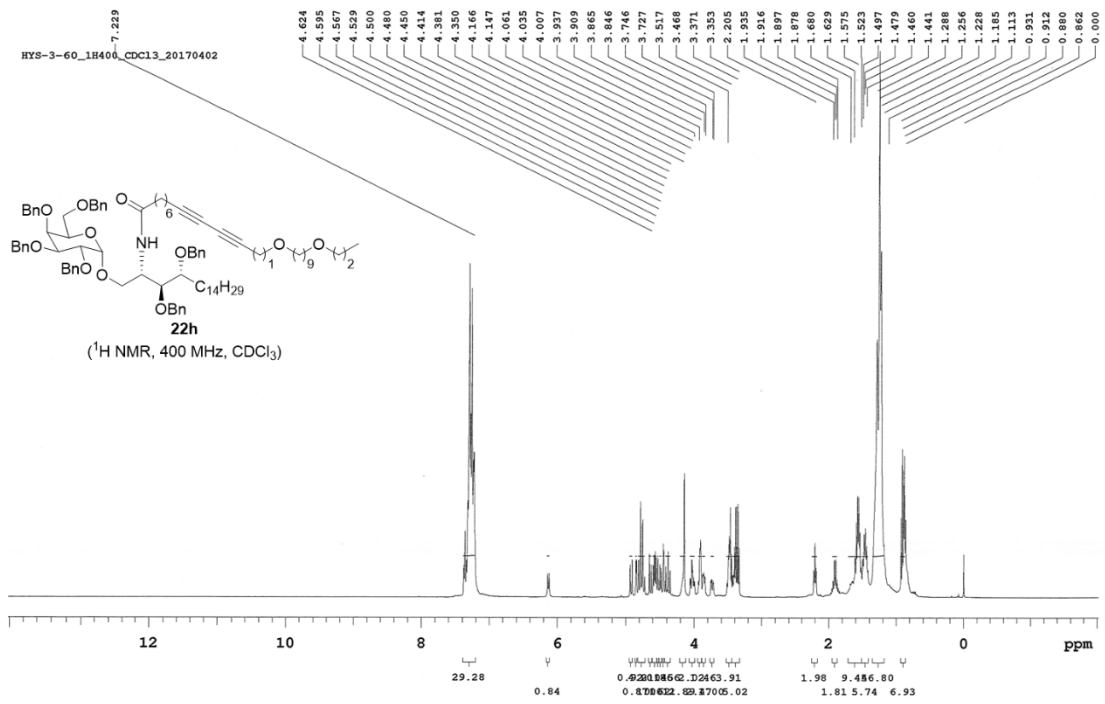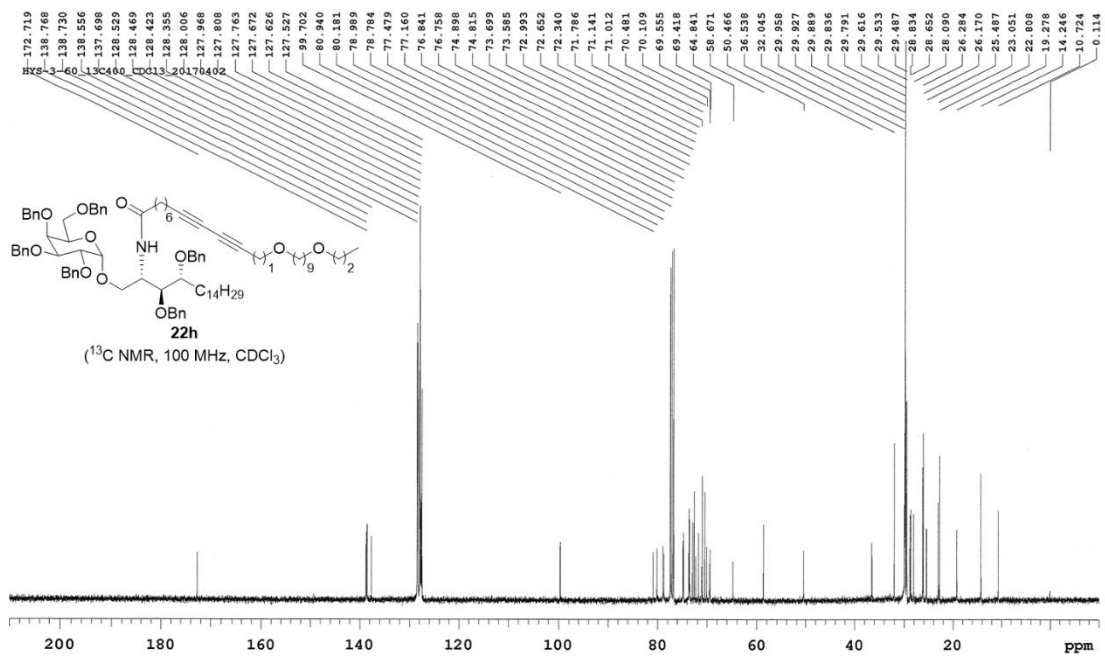

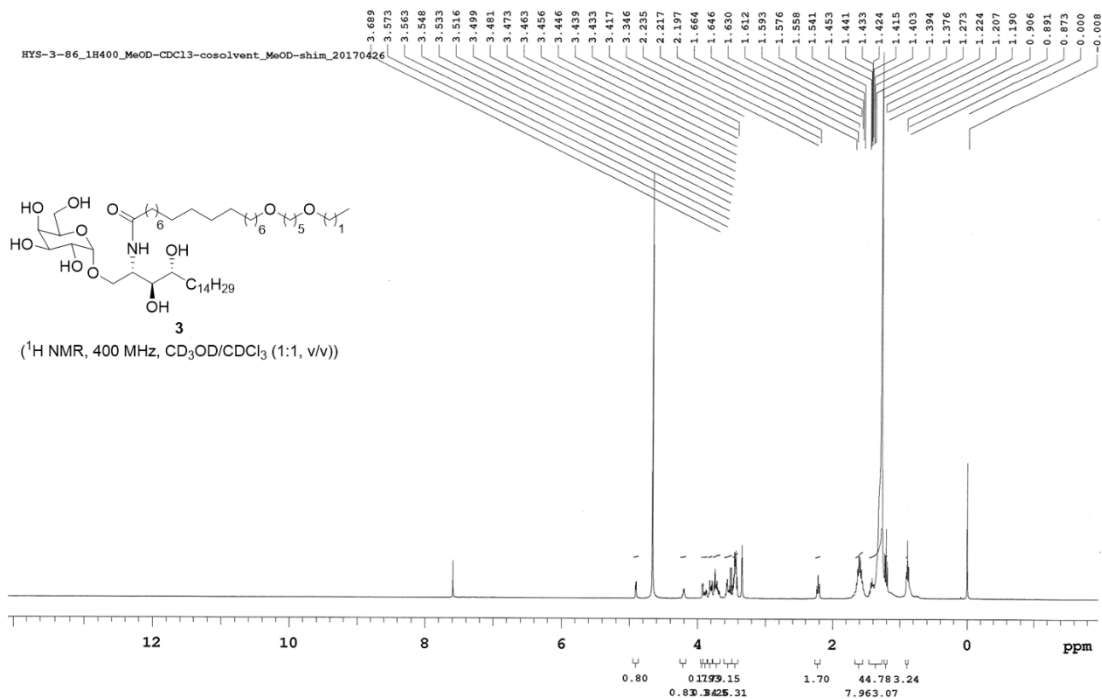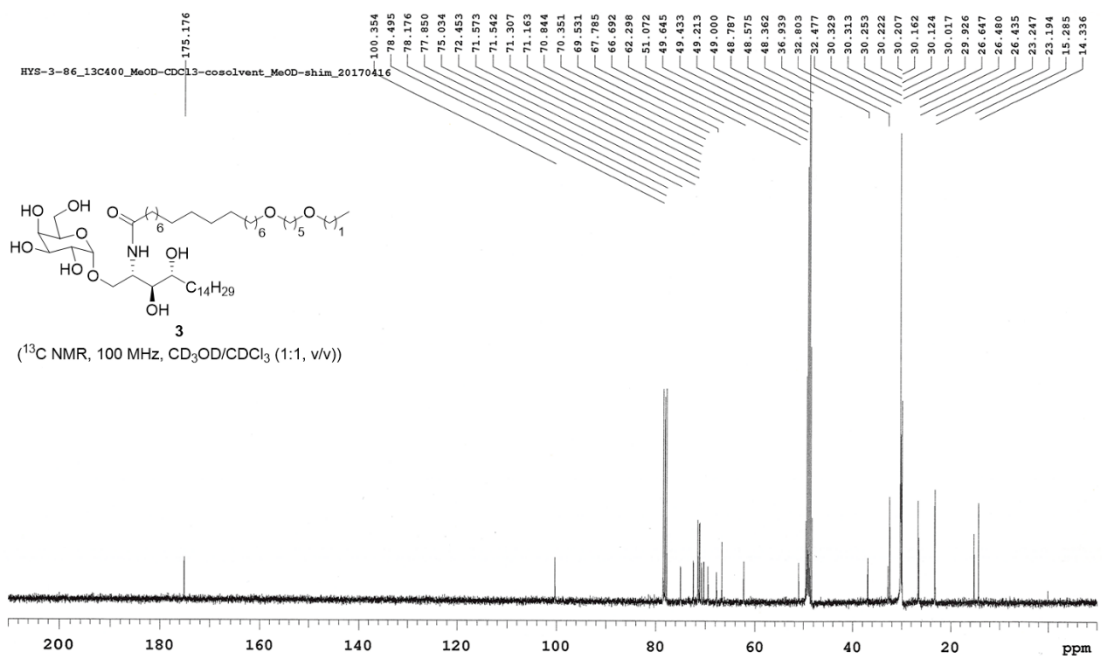



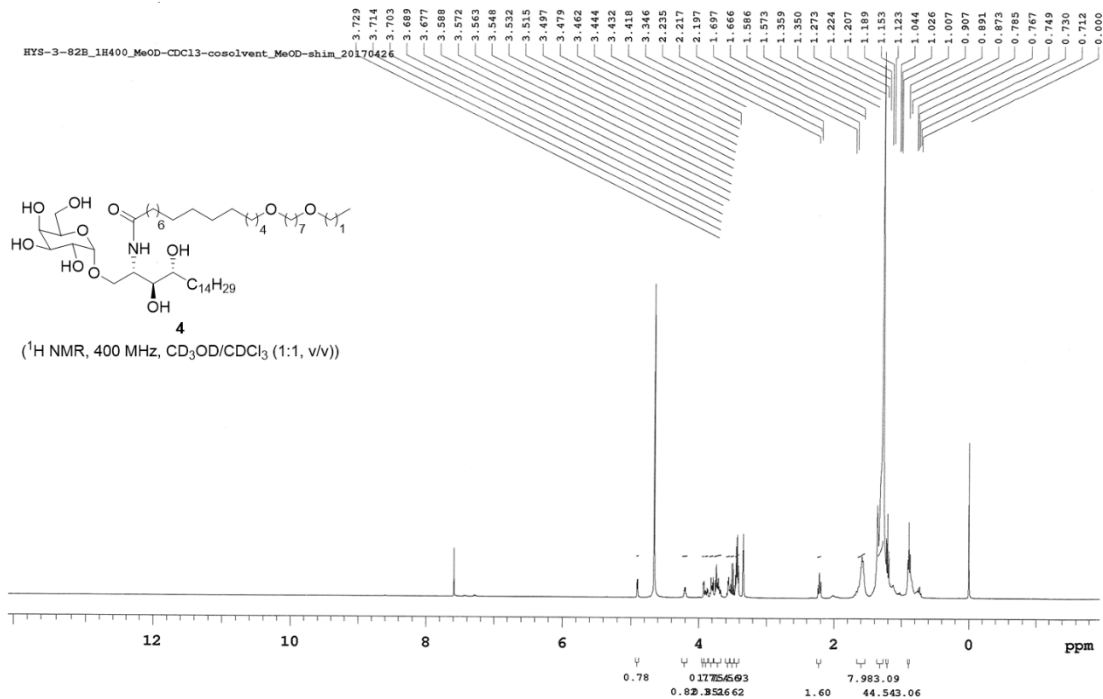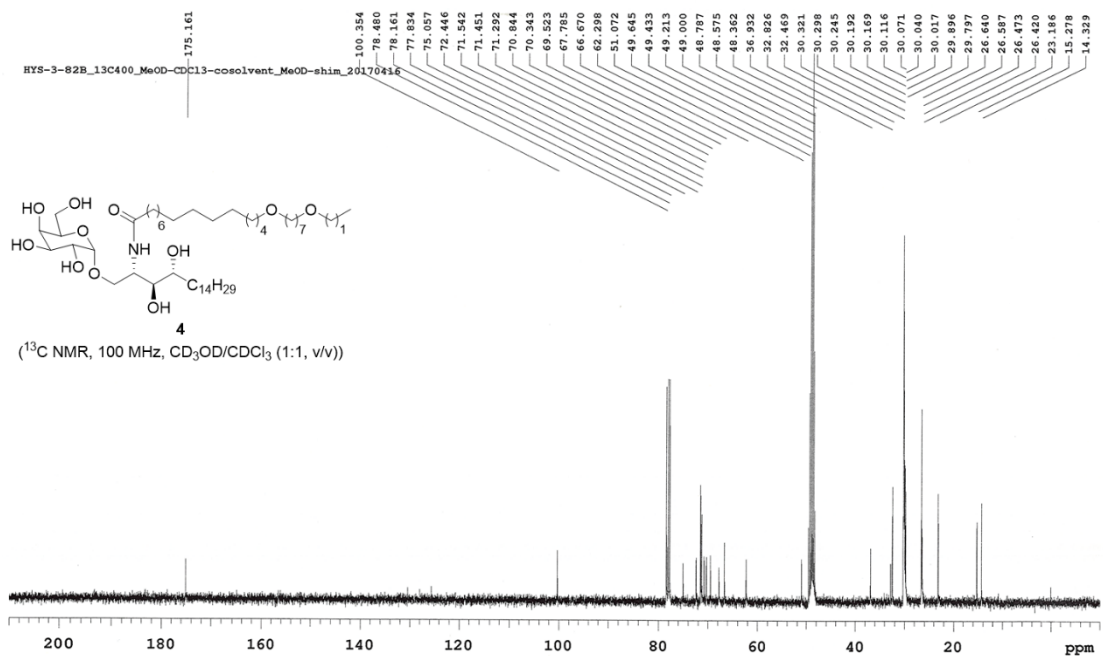

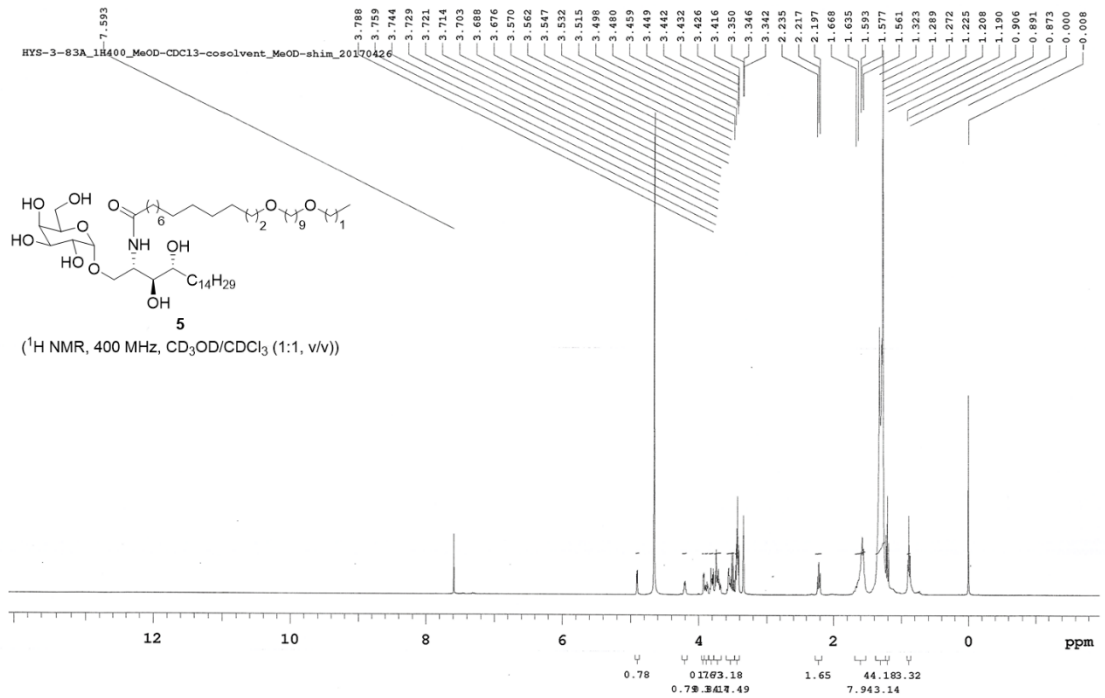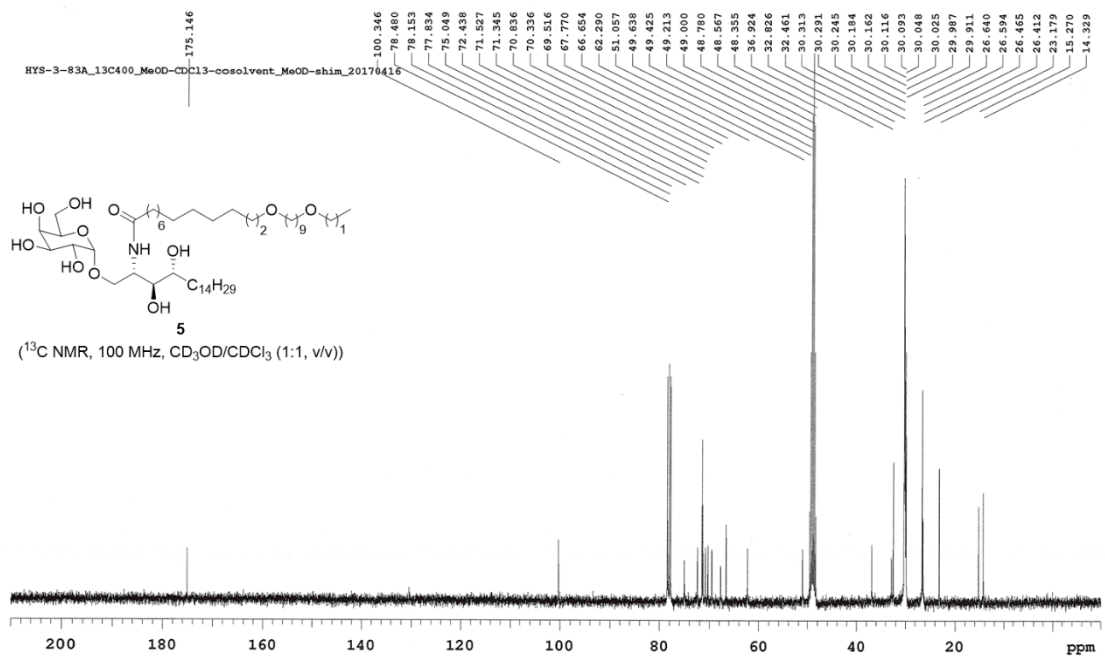



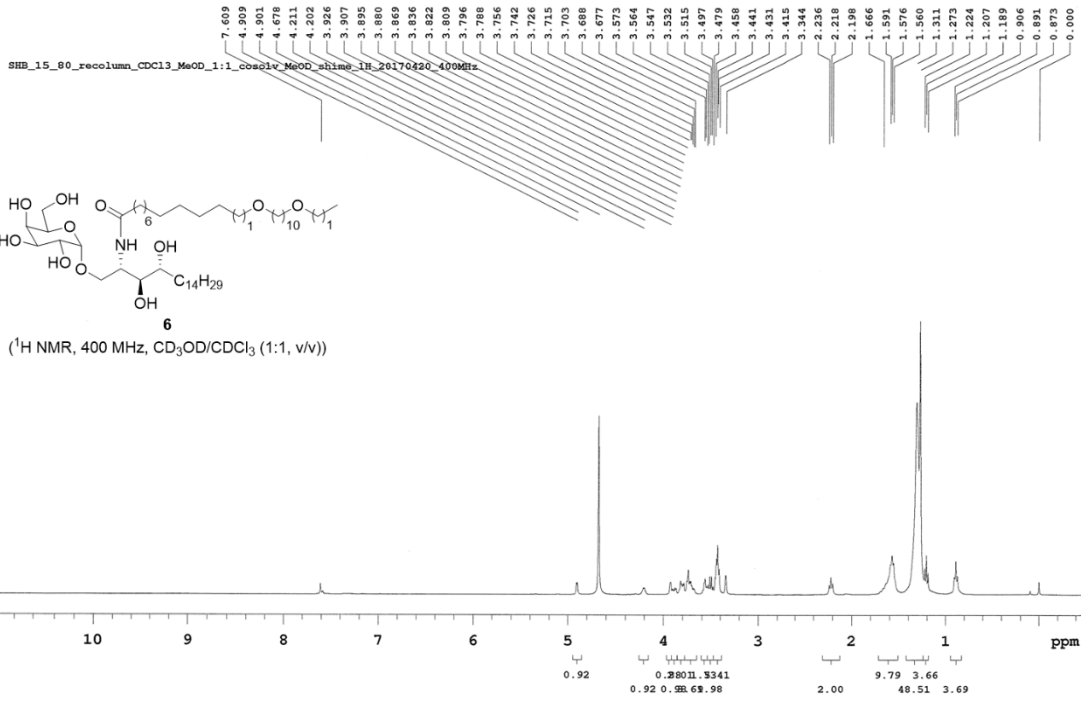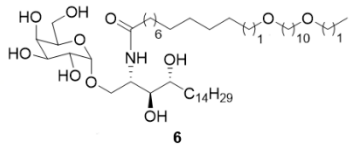

(<sup>1</sup>H NMR, 400 MHz, CD<sub>3</sub>OD/CDCl<sub>3</sub> (1:1, v/v))

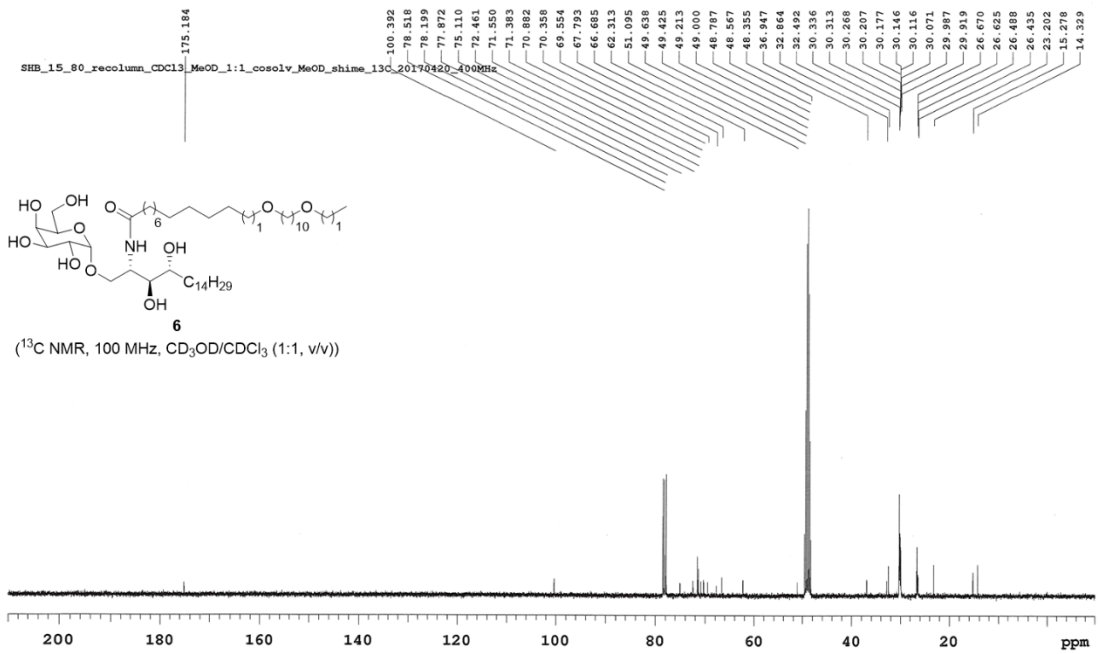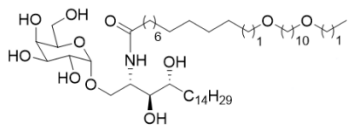

(<sup>13</sup>C NMR, 100 MHz, CD<sub>3</sub>OD/CDCl<sub>3</sub> (1:1, v/v))

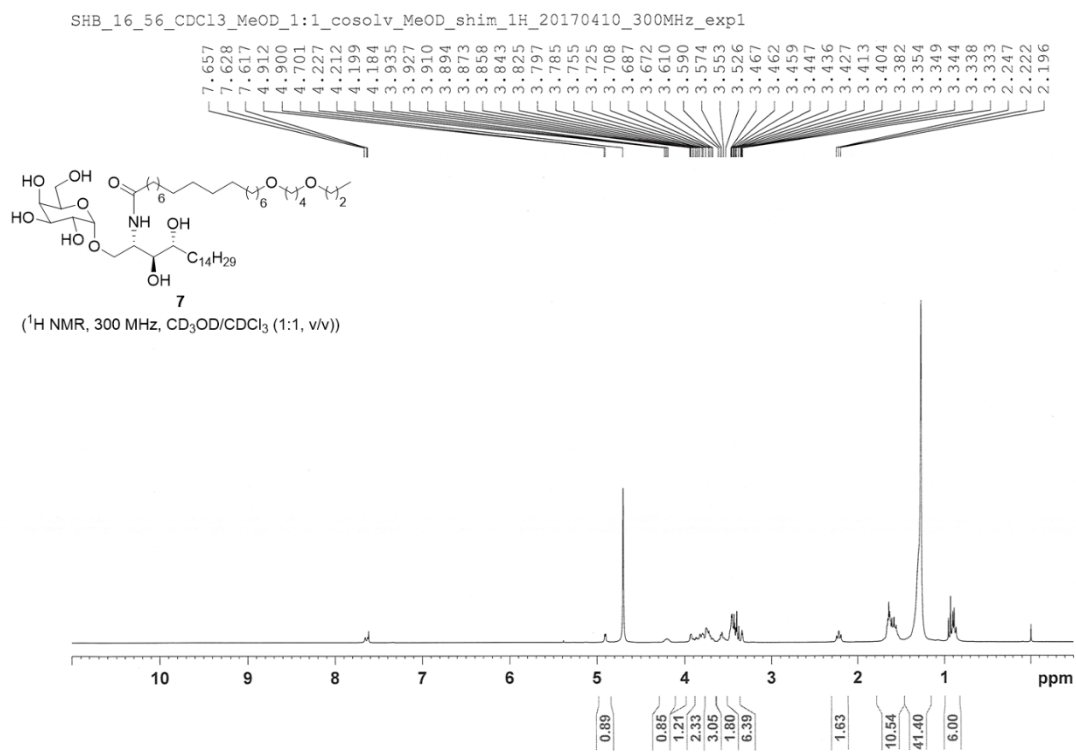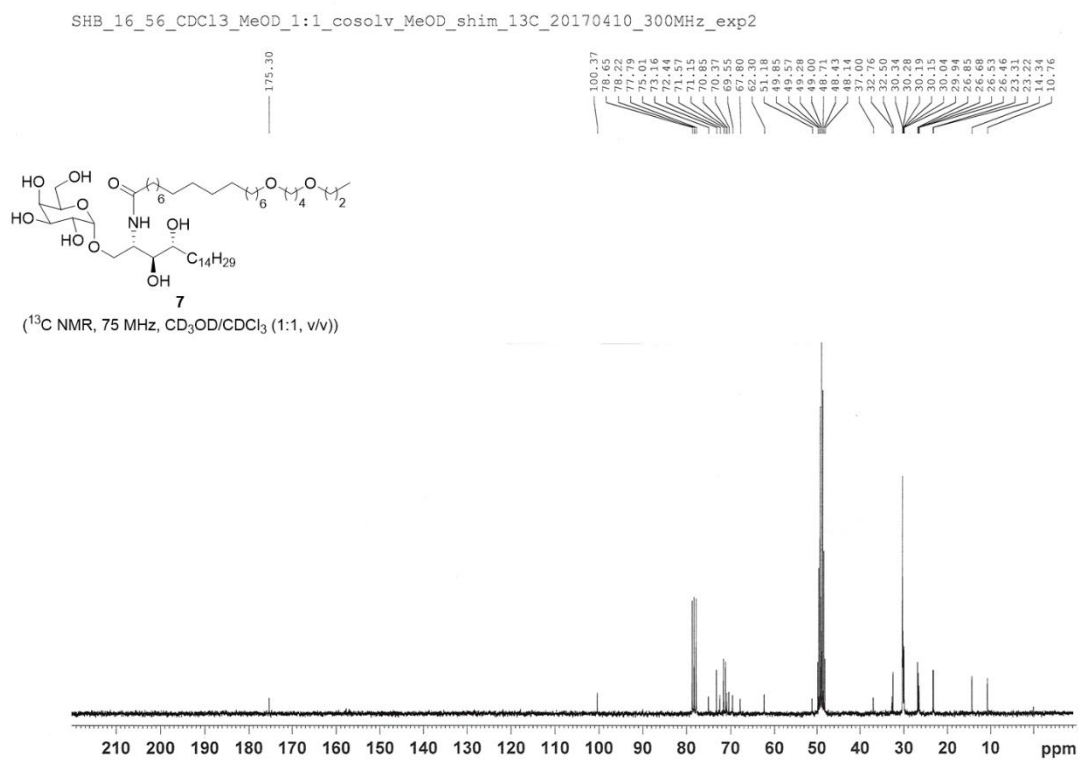

SHB\_16\_55\_CDC13\_MeOD\_1:1\_cosolv\_MeOD\_shim\_1H\_20170410\_300MHz\_exp3

7.614  
4.912  
4.901  
4.704  
4.209  
4.194  
3.928  
3.911  
3.895  
3.874  
3.859  
3.825  
3.797  
3.786  
3.756  
3.748  
3.725  
3.708  
3.687  
3.671  
3.608  
3.588  
3.573  
3.553  
3.462  
3.453  
3.444  
3.440  
3.432  
3.423  
3.410  
3.401  
3.378  
3.350  
3.345  
3.340  
2.246  
2.221  
1.657  
1.634  
1.610

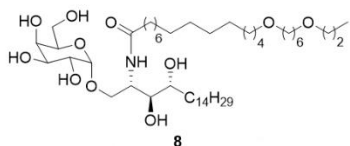

(<sup>1</sup>H NMR, 300 MHz, CD<sub>3</sub>OD/CDCl<sub>3</sub> (1:1, v/v))

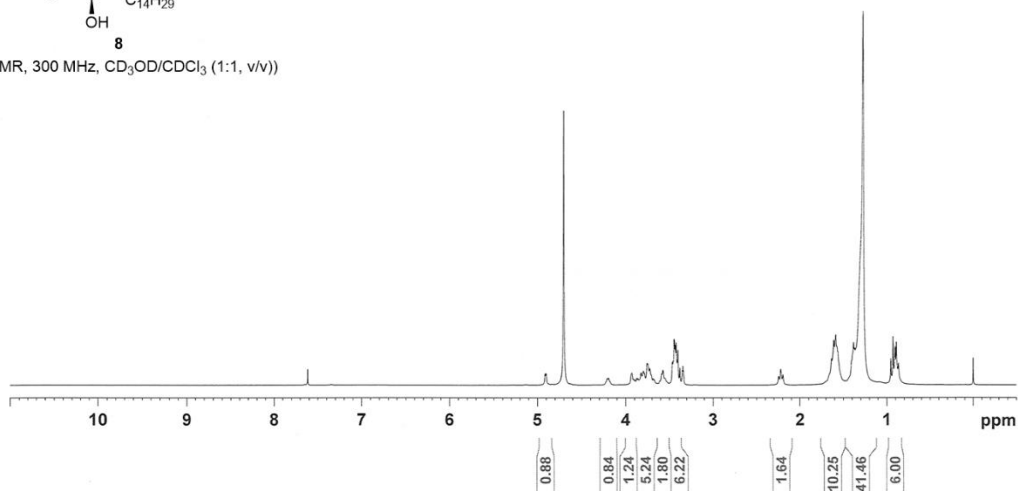

SHB-16-55\_13C400\_MeOD/CDCl3\_20170410

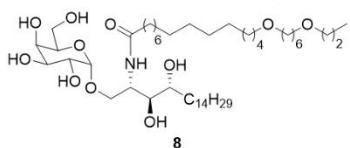

(<sup>13</sup>C NMR, 100 MHz, CD<sub>3</sub>OD/CDCl<sub>3</sub> (1:1, v/v))

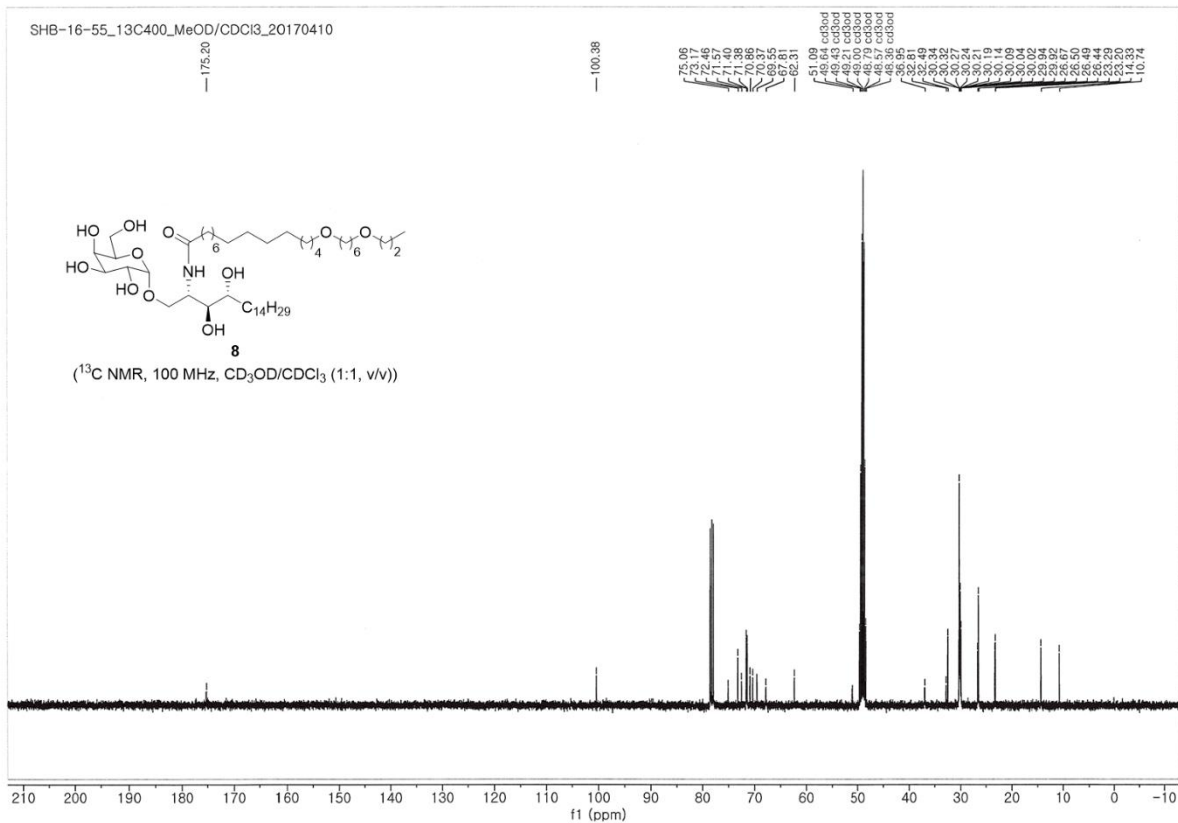

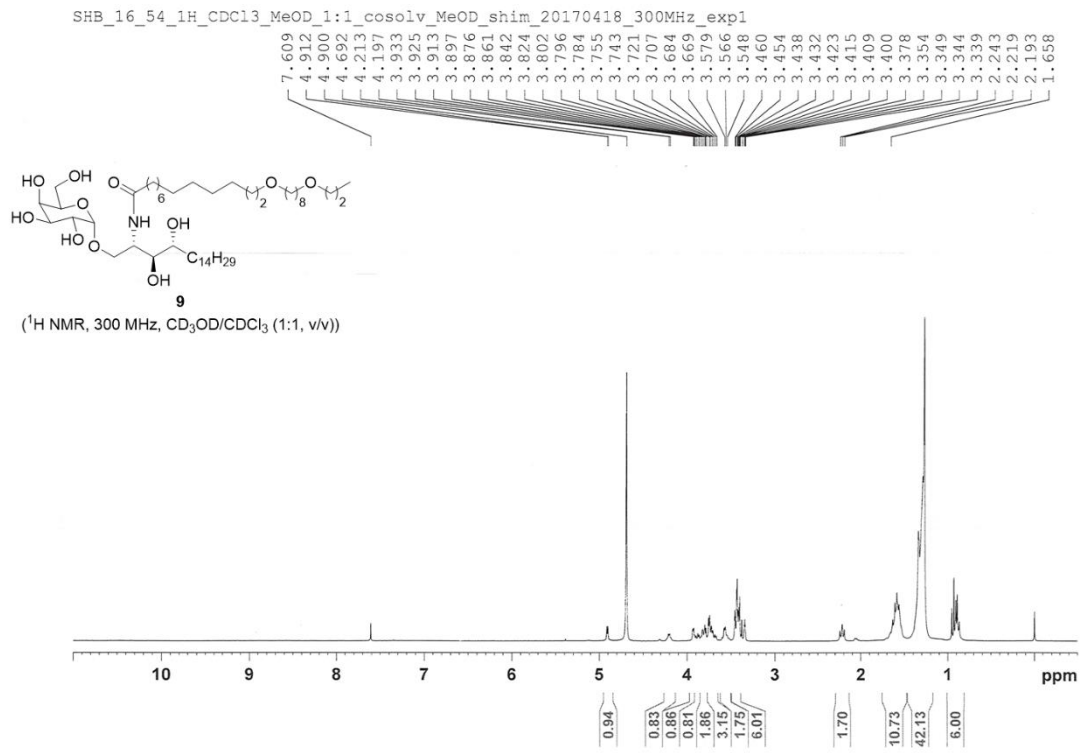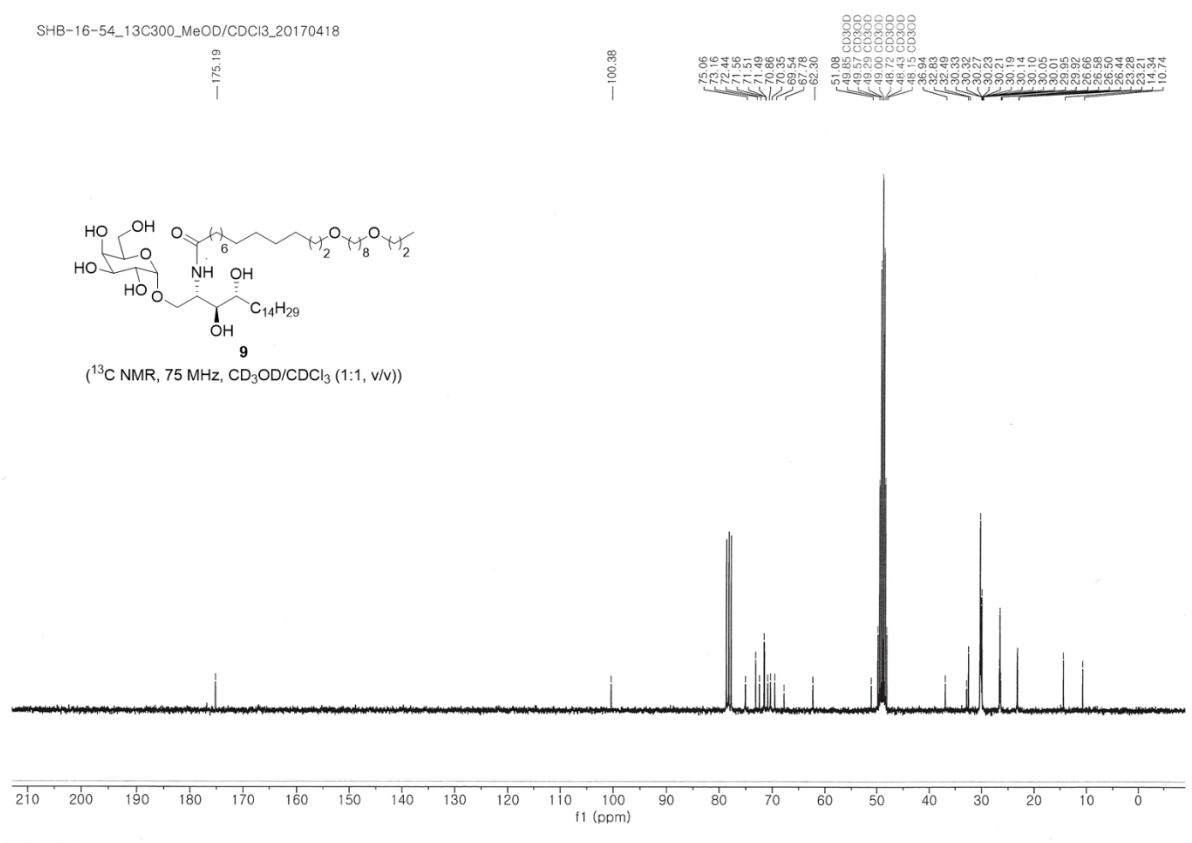

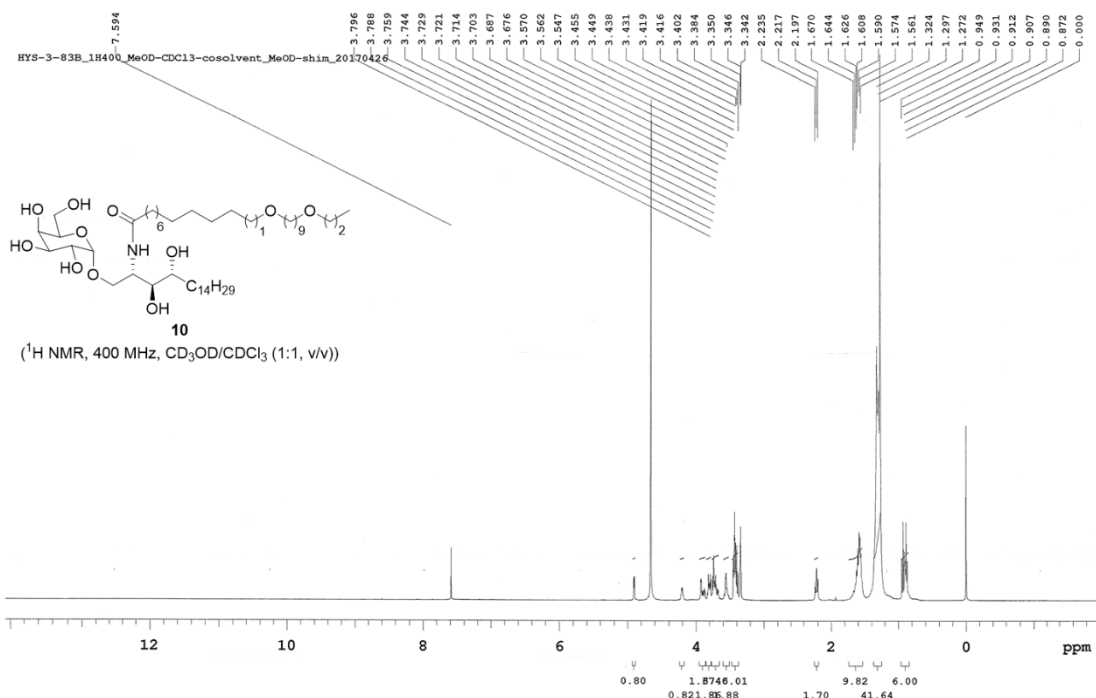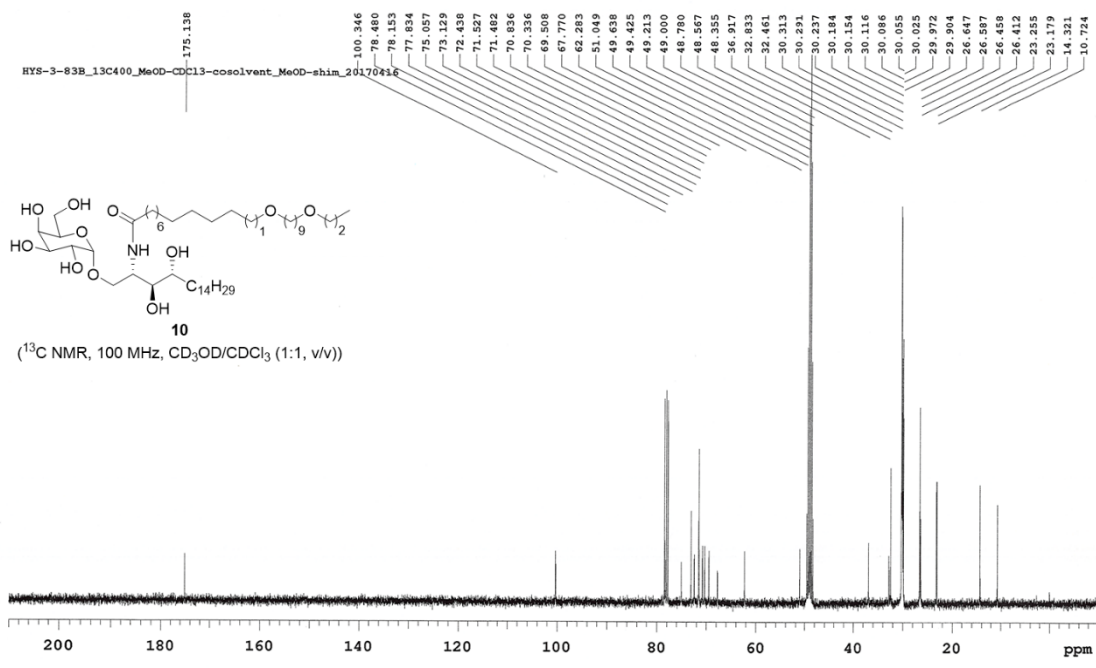

## 5. References

- 1) *J. Org. Chem.*, **2013**, *78*, 378–3801.
- 2) *Tetrahedron*, **2005**, *61*, 1855–1862.
